# Supplementary material
Source: publisher figshare collection journal article supplement (https://acs.figshare.com/ndownloader/files/22331751)
Supplement: Supplementary file 1 [file 22331751]

## Sheet: repeat 1
Checked	Protein FDR Confidence	Master	Accession	Description	Exp. q-value	Sum PEP Score	Coverage	# Peptides	# PSMs	# Unique Peptides	# Protein Groups	# AAs	MW [kDa]	calc. pI	Score Sequest HT	# Peptides Sequest HT
FALSE	High	Master Protein	G7XXM0	Uncharacterized protein OS=Aspergillus kawachii (strain NBRC 4308) OX=1033177 GN=AKAW_09800 PE=4 SV=1	0	144.943	11.0092	15	51	15	1	1417	151.4	5.58	167.38	15
FALSE	High	Master Protein	A0A146FUI4	Transketolase OS=Aspergillus luchuensis OX=1069201 GN=RIB2604_02602360 PE=3 SV=1	0	100.073	26.7544	16	32	16	1	684	74.7	6.37	91.14	16
FALSE	High	Master Protein	A0A1L9MZE6	Uncharacterized protein OS=Aspergillus tubingensis CBS 134.48 OX=767770 GN=ASPTUDRAFT_126184 PE=3 SV=1	0	96.979	28.4144	16	43	15	1	637	69.4	5.17	126.1	16
FALSE	High	Master Protein	A0A146FC89	Fructose-bisphosphate aldolase, class II OS=Aspergillus luchuensis OX=1069201 GN=RIB2604_01706270 PE=4 SV=1	0	96.69	27.5	10	20	10	1	360	39.4	5.81	79.14	10
FALSE	High	Master Protein	G7XK81	Conidiation-specific protein (Con-10) OS=Aspergillus kawachii (strain NBRC 4308) OX=1033177 GN=AKAW_05493 PE=4 SV=1	0	95.031	45.977	5	22	5	1	87	9.2	5.12	85.64	5
FALSE	High	Master Protein	A0A1M3TZ99	Uncharacterized protein OS=Aspergillus luchuensis CBS 106.47 OX=1137211 GN=ASPFODRAFT_39211 PE=4 SV=1	0	80.916	25.8294	20	40	20	1	844	93.6	6.9	107.83	20
FALSE	High	Master Protein	A0A100I1U7	Catalase OS=Aspergillus niger OX=5061 GN=ABL_00030 PE=3 SV=1	0	67.452	17.0564	11	18	10	1	727	80.2	5.26	59.88	11
FALSE	High	Master Protein	A0A1L9NPK9	Uncharacterized protein OS=Aspergillus tubingensis CBS 134.48 OX=767770 GN=ASPTUDRAFT_26610 PE=3 SV=1	0	67.401	32.5956	13	21	13	1	497	53.8	6.47	57.73	13
FALSE	High	Master Protein	A0A117DYT5	Cobalamin-independent methionine synthase OS=Aspergillus niger OX=5061 GN=ABL_02132 PE=3 SV=1	0	64.099	24.677	18	32	18	1	774	87.1	6.76	88.88	18
FALSE	High	Master Protein	A0A146FEW3	Exo-beta-1,3-glucanase OS=Aspergillus luchuensis OX=1069201 GN=RIB2604_01711360 PE=4 SV=1	0	62.681	9.11583	11	26	3	1	1459	159.3	6.04	79.14	11
FALSE	High	Master Protein	A0A146FP91	Endo-1,3-beta-glucanase Engl1 OS=Aspergillus luchuensis OX=1069201 GN=RIB2604_02111510 PE=4 SV=1	0	62.253	13.7072	12	26	12	1	963	103.7	5.67	63.21	12
FALSE	High	Master Protein	A0A146F1W8	Transaldolase OS=Aspergillus luchuensis OX=1069201 GN=RIB2604_00603220 PE=4 SV=1	0	62.039	37.963	13	35	13	1	324	35.4	6.02	110.97	13
FALSE	High	Master Protein	A0A1L9MW36	Aminopeptidase OS=Aspergillus tubingensis CBS 134.48 OX=767770 GN=ASPTUDRAFT_46577 PE=3 SV=1	0	58.718	21.0794	19	26	19	1	982	108.6	6.61	63.22	19
FALSE	High	Master Protein	A0A100IK75	ATP synthase subunit beta OS=Aspergillus niger OX=5061 GN=ABL_05426 PE=3 SV=1	0	58.556	23.3591	10	30	10	1	518	55.6	5.31	78.11	10
FALSE	High	Master Protein	A0A146FA76	Aconitate hydratase, mitochondrial OS=Aspergillus luchuensis OX=1069201 GN=RIB2604_01602440 PE=3 SV=1	0	58.243	19.6721	12	17	12	1	793	86.1	6.43	47.93	12
FALSE	High	Master Protein	A0A1M3TQL6	Glycoside hydrolase family 55 protein OS=Aspergillus luchuensis CBS 106.47 OX=1137211 GN=ASPFODRAFT_129345 PE=4 SV=1	0	53.171	13.7931	9	22	1	1	783	83.7	5.17	66.7	9
FALSE	High	Master Protein	G7XH77	Translation elongation factor eEF-1 subunit gamma OS=Aspergillus kawachii (strain NBRC 4308) OX=1033177 GN=AKAW_04399 PE=4 SV=1	0	52.994	29.0954	12	19	12	1	409	46.1	7.02	54.46	12
FALSE	High	Master Protein	A0A100ILI8	ATP synthase subunit alpha OS=Aspergillus niger OX=5061 GN=ABL_06100 PE=3 SV=1	0	52.871	21.5827	10	20	10	1	556	60	9.07	55.68	10
FALSE	High	Master Protein	A0A146F005	Hydrolase, CocE/NonD family OS=Aspergillus luchuensis OX=1069201 GN=RIB2604_00601180 PE=4 SV=1	0	51.417	21.8333	11	19	11	1	600	68.4	6.16	57.25	11
FALSE	High	Master Protein	A0A146F7G1	Phosphoenolpyruvate carboxykinase [ATP] OS=Aspergillus luchuensis OX=1069201 GN=RIB2604_01502570 PE=3 SV=1	0	50.327	20.6667	10	18	10	1	600	66.3	6.33	51.84	10
FALSE	High	Master Protein	A0A146FTU0	Similar to An08g06730 OS=Aspergillus luchuensis OX=1069201 GN=RIB2604_02602520 PE=4 SV=1	0	48.225	25.1366	5	21	5	1	183	19.4	4.46	72.02	5
FALSE	High	Master Protein	A0A1M3TU40	Uncharacterized protein OS=Aspergillus luchuensis CBS 106.47 OX=1137211 GN=ASPFODRAFT_67363 PE=4 SV=1	0	48.133	18.5612	10	15	10	1	695	77.8	6.89	35.85	10
FALSE	High	Master Protein	A0A254TLV6	14-3-3 protein family protein OS=Aspergillus niger OX=5061 GN=CAN33_44625 PE=3 SV=1	0	47.045	22.6471	8	12	7	1	340	38.5	6.46	37.14	8
FALSE	High	Master Protein	G7XGN1	Malate dehydrogenase OS=Aspergillus kawachii (strain NBRC 4308) OX=1033177 GN=AKAW_04204 PE=3 SV=1	0	46.887	33.8235	9	16	8	1	340	35.6	8.66	47.76	9
FALSE	High	Master Protein	F8WSL2	Enolase/allergen Asp F 22 OS=Aspergillus luchuensis OX=1069201 GN=ALenoA PE=3 SV=1	0	46.737	21.0046	7	14	7	1	438	47.3	5.48	42.66	7
FALSE	High	Master Protein	A0A124BX74	Adenosylhomocysteinase OS=Aspergillus niger OX=5061 GN=ABL_04200 PE=3 SV=1	0	45.917	30.2895	12	21	12	1	449	49	6.29	57.42	12
FALSE	High	Master Protein	A0A1L9N508	Uncharacterized protein OS=Aspergillus tubingensis CBS 134.48 OX=767770 GN=ASPTUDRAFT_56215 PE=3 SV=1	0	43.587	14.2857	11	14	11	1	840	91.5	7.99	39.76	11
FALSE	High	Master Protein	A0A1M3T2L8	Uncharacterized protein OS=Aspergillus luchuensis CBS 106.47 OX=1137211 GN=ASPFODRAFT_52687 PE=4 SV=1	0	43.291	23.0539	7	15	7	1	334	36.9	6.46	49.61	7
FALSE	High	Master Protein	G7XXB7	Glutathione-dependent formaldehyde-activating enzyme OS=Aspergillus kawachii (strain NBRC 4308) OX=1033177 GN=AKAW_09690 PE=4 SV=1	0	43.202	22.4199	6	12	6	1	281	30.4	6.83	34.45	6
FALSE	High	Master Protein	A0A1M3T512	Uncharacterized protein OS=Aspergillus luchuensis CBS 106.47 OX=1137211 GN=ASPFODRAFT_144852 PE=4 SV=1	0	42.743	21.813	7	14	7	1	353	38.2	5.54	39.7	7
FALSE	High	Master Protein	A0A100I837	RNA Polymerase II CTD phosphatase Fcp1 OS=Aspergillus niger OX=5061 GN=ABL_01670 PE=3 SV=1	0	42.432	2.06101	5	12	5	1	1213	133.7	4.78	40.47	5
FALSE	High	Master Protein	A0A100ITY0	Prolidase PepP OS=Aspergillus niger OX=5061 GN=ABL_09893 PE=3 SV=1	0	42.263	22.5322	9	13	9	1	466	51.7	5.71	36.16	9
FALSE	High	Master Protein	A0A146F5U9	Amine oxidase OS=Aspergillus luchuensis OX=1069201 GN=RIB2604_00901340 PE=3 SV=1	0	41.703	19.2982	10	15	10	1	684	76.4	6.74	39.64	10
FALSE	High	Master Protein	A0A100INE1	Elongation factor 1-alpha OS=Aspergillus niger OX=5061 GN=ABL_07058 PE=3 SV=1	0	40.016	21.087	10	24	5	1	460	49.9	8.92	63.85	10
FALSE	High	Master Protein	A0A100IQA3	60S ribosomal protein L2 OS=Aspergillus niger OX=5061 GN=ABL_08067 PE=4 SV=1	0	39.985	19.2913	3	9	3	1	254	27.4	10.98	29.92	3
FALSE	High	Master Protein	A0A1M3TCZ1	Triosephosphate isomerase OS=Aspergillus luchuensis CBS 106.47 OX=1137211 GN=ASPFODRAFT_138607 PE=3 SV=1	0	39.898	38.9558	8	16	8	1	249	26.8	5.78	41.93	8
FALSE	High	Master Protein	A0A1L9UFR2	Uncharacterized protein OS=Aspergillus brasiliensis CBS 101740 OX=767769 GN=ASPBRDRAFT_155391 PE=3 SV=1	0	39.61	30.8271	7	16	7	1	266	29.2	9.1	47.73	7
FALSE	High	Master Protein	A0A1L9N080	6-phosphogluconate dehydrogenase, decarboxylating OS=Aspergillus tubingensis CBS 134.48 OX=767770 GN=ASPTUDRAFT_30718 PE=3 SV=1	0	39.202	22.6378	9	16	9	1	508	55.7	6.64	46.66	9
FALSE	High	Master Protein	G7XRI2	Similar to An08g02170 OS=Aspergillus kawachii (strain NBRC 4308) OX=1033177 GN=AKAW_07655 PE=4 SV=1	0	39.038	33.5106	6	13	6	1	188	20.5	4.77	40.63	6
FALSE	High	Master Protein	A0A1M3TAS7	Beta-glucosidase OS=Aspergillus luchuensis CBS 106.47 OX=1137211 GN=ASPFODRAFT_35322 PE=3 SV=1	0	39.015	13.9211	11	18	11	1	862	93.5	4.84	51.81	11
FALSE	High	Master Protein	A0A1M3T691	Uncharacterized protein OS=Aspergillus luchuensis CBS 106.47 OX=1137211 GN=ASPFODRAFT_347443 PE=4 SV=1	0	38.761	6	11	11	11	1	2150	234.1	6.33	29.45	11
FALSE	High	Master Protein	A0A1M3TUB6	Uncharacterized protein OS=Aspergillus luchuensis CBS 106.47 OX=1137211 GN=ASPFODRAFT_40558 PE=4 SV=1	0	38.296	25.6684	4	14	1	1	187	20.3	5.57	42.36	4
FALSE	High	Master Protein	A0A1L9MYV0	Uncharacterized protein OS=Aspergillus tubingensis CBS 134.48 OX=767770 GN=ASPTUDRAFT_125988 PE=3 SV=1	0	37.543	33.4615	9	13	8	1	260	28.9	4.84	34.42	9
FALSE	High	Master Protein	A0A100IA53	Pyruvate carboxylase OS=Aspergillus niger OX=5061 GN=ABL_02163 PE=4 SV=1	0	37.514	12.5839	13	18	13	1	1192	130.9	6.51	44.96	13
FALSE	High	Master Protein	A0A146FPU4	Catalase-peroxidase OS=Aspergillus luchuensis OX=1069201 GN=katG PE=3 SV=1	0	37.204	12.8609	9	12	9	1	762	84.4	6.74	35.42	9
FALSE	High	Master Protein	A0A100I553	Ribose/galactose isomerase OS=Aspergillus niger OX=5061 GN=ABL_00941 PE=4 SV=1	0	36.693	34.5679	6	19	6	1	162	17.2	7.85	54.37	6
FALSE	High	Master Protein	A0A0S7DEQ6	Actin, gamma OS=Aspergillus lentulus OX=293939 GN=ALT_0877 PE=3 SV=1	0	36.648	22.3005	8	15	8	1	426	47	6.42	36.46	8
FALSE	High	Master Protein	A0A1L9NJE9	Uncharacterized protein OS=Aspergillus tubingensis CBS 134.48 OX=767770 GN=ASPTUDRAFT_49054 PE=4 SV=1	0	36.272	13.6264	9	16	9	1	455	51.7	7.25	41.78	9
FALSE	High	Master Protein	A0A146FPS5	Fumarylacetoacetate hydrolase family protein OS=Aspergillus luchuensis OX=1069201 GN=RIB2604_02109200 PE=4 SV=1	0	36.149	16.9492	4	8	4	1	295	31.5	5.67	24.4	4
FALSE	High	Master Protein	A0A117DZT2	Phosphoglycerate kinase OS=Aspergillus niger OX=5061 GN=ABL_04221 PE=3 SV=1	0	35.345	27.5779	11	14	11	1	417	44.3	6.6	33.76	11
FALSE	High	Master Protein	A0A1L9UVH3	Alpha-mannosidase OS=Aspergillus brasiliensis CBS 101740 OX=767769 GN=ASPBRDRAFT_115517 PE=3 SV=1	0	35.273	10.2847	9	10	9	1	1089	123.1	6.55	21.81	9
FALSE	High	Master Protein	A0A1L9N988	Uncharacterized protein OS=Aspergillus tubingensis CBS 134.48 OX=767770 GN=ASPTUDRAFT_118104 PE=4 SV=1	0	35.107	31.3589	8	15	8	1	287	32.3	5.36	37.28	8
FALSE	High	Master Protein	A0A100IQ27	60S ribosomal protein L7A OS=Aspergillus niger OX=5061 GN=ABL_07931 PE=4 SV=1	0	34.689	15.7658	7	13	7	1	444	49.2	9.77	40.74	7
FALSE	High	Master Protein	A0A1M3THH9	Malate dehydrogenase OS=Aspergillus luchuensis CBS 106.47 OX=1137211 GN=ASPFODRAFT_208041 PE=3 SV=1	0	34.441	24.8485	7	8	6	1	330	34.5	6.57	24.23	7
FALSE	High	Master Protein	A0A1M3T678	Uncharacterized protein OS=Aspergillus luchuensis CBS 106.47 OX=1137211 GN=ASPFODRAFT_196979 PE=4 SV=1	0	33.859	19.8925	6	10	6	1	372	40.3	10.95	30.02	6
FALSE	High	Master Protein	A0A100IHH4	Glutaredoxin OS=Aspergillus niger OX=5061 GN=ABL_04082 PE=4 SV=1	0	33.495	18.4652	6	8	6	1	417	46.4	9.06	27.4	6
FALSE	High	Master Protein	A0A146F0P2	Cupin domain protein OS=Aspergillus luchuensis OX=1069201 GN=RIB2604_00601170 PE=4 SV=1	0	33.446	26.2032	4	12	1	1	187	20.2	5.17	35.3	4
FALSE	High	Master Protein	A0A1L9MQS4	Uncharacterized protein OS=Aspergillus tubingensis CBS 134.48 OX=767770 GN=ASPTUDRAFT_155507 PE=4 SV=1	0	33.365	6.54673	11	11	11	1	2001	225.2	6.33	26.31	11
FALSE	High	Master Protein	P56205	Cytochrome c OS=Aspergillus niger OX=5061 GN=cycA PE=1 SV=1	0	32.803	35.1351	5	12	5	1	111	11.9	9.22	32.85	5
FALSE	High	Master Protein	A0A1M3TGY4	Lytic polysaccharide monooxygenase OS=Aspergillus luchuensis CBS 106.47 OX=1137211 GN=ASPFODRAFT_207846 PE=4 SV=1	0	32.787	13.1367	4	16	2	1	373	38.7	5.62	51.96	4
FALSE	High	Master Protein	A0A1M3TIT9	Uncharacterized protein OS=Aspergillus luchuensis CBS 106.47 OX=1137211 GN=ASPFODRAFT_32824 PE=4 SV=1	0	32.68	13.1313	3	12	3	1	198	21.5	5.55	41.6	3
FALSE	High	Master Protein	A0A146FXI1	Uncharacterized protein OS=Aspergillus luchuensis OX=1069201 GN=RIB2604_03000840 PE=4 SV=1	0	32.591	13.1016	4	9	2	1	374	38.8	5.63	27.42	4
FALSE	High	Master Protein	A0A146FMI1	Uncharacterized protein OS=Aspergillus luchuensis OX=1069201 GN=RIB2604_02101700 PE=4 SV=1	0	32.435	34.7222	6	12	6	1	144	15.7	6.18	36.39	6
FALSE	High	Master Protein	A0A1M3TA46	Uncharacterized protein OS=Aspergillus luchuensis CBS 106.47 OX=1137211 GN=ASPFODRAFT_83090 PE=4 SV=1	0	32.08	3.63498	12	13	12	1	3934	430.6	6.29	28.52	12
FALSE	High	Master Protein	G7XV40	Preproproctase B OS=Aspergillus kawachii (strain NBRC 4308) OX=1033177 GN=AKAW_08863 PE=3 SV=1	0	31.815	19.5431	6	14	6	1	394	41.3	4.69	43.83	6
FALSE	High	Master Protein	A0A146F8Z6	ATP citrate lyase subunit OS=Aspergillus luchuensis OX=1069201 GN=RIB2604_01500600 PE=4 SV=1	0	31.725	25.7732	12	20	12	1	485	52.9	6.23	44.88	12
FALSE	High	Master Protein	A0A1L9N7K0	Uncharacterized protein OS=Aspergillus tubingensis CBS 134.48 OX=767770 GN=ASPTUDRAFT_54933 PE=3 SV=1	0	31.242	17.2973	9	14	6	1	555	60.4	6.02	37.72	9
FALSE	High	Master Protein	A0A1L9N1J3	Uncharacterized protein OS=Aspergillus tubingensis CBS 134.48 OX=767770 GN=ASPTUDRAFT_57142 PE=4 SV=1	0	30.624	11.0105	11	12	7	1	1435	155.6	8.18	24.95	11
FALSE	High	Master Protein	A0A100IRD7	Beta-hexosaminidase OS=Aspergillus niger OX=5061 GN=ABL_08622 PE=3 SV=1	0	30.51	11.4809	6	12	1	1	601	67.4	4.94	33.91	6
FALSE	High	Master Protein	G7XB55	ATP-citrate synthase subunit 1 OS=Aspergillus kawachii (strain NBRC 4308) OX=1033177 GN=AKAW_02252 PE=4 SV=1	0	30.485	9.29878	5	10	5	1	656	71.5	8.05	23.83	5
FALSE	High	Master Protein	A0A1M3TUW4	Uncharacterized protein OS=Aspergillus luchuensis CBS 106.47 OX=1137211 GN=ASPFODRAFT_418059 PE=4 SV=1	0	30.395	8.37838	8	10	8	1	1110	122.8	6.74	28.51	8
FALSE	High	Master Protein	A0A1M3T6Z1	Beta-hexosaminidase OS=Aspergillus luchuensis CBS 106.47 OX=1137211 GN=ASPFODRAFT_36898 PE=3 SV=1	0	30.285	11.4618	6	11	1	1	602	67.6	4.93	31.28	6
FALSE	High	Master Protein	A0A124BXS3	Heat shock protein SSC1, mitochondrial OS=Aspergillus niger OX=5061 GN=ABL_05973 PE=3 SV=1	0	30.049	14.5646	8	11	8	1	666	72.1	5.83	30.47	8
FALSE	High	Master Protein	A0A117E363	Glyceraldehyde-3-phosphate dehydrogenase OS=Aspergillus niger OX=5061 GN=ABL_09274 PE=3 SV=1	0	29.891	21.7262	6	16	4	1	336	36.2	7.11	49.48	6
FALSE	High	Master Protein	A0A100IKP3	Peroxisomal multifunctional beta-oxidation protein OS=Aspergillus niger OX=5061 GN=ABL_05683 PE=4 SV=1	0	29.857	13.2075	9	12	9	1	901	97	8.22	28.36	9
FALSE	High	Master Protein	G7XZ66	Formate dehydrogenase OS=Aspergillus kawachii (strain NBRC 4308) OX=1033177 GN=AKAW_10339 PE=3 SV=1	0	29.732	16.9856	7	16	7	1	418	45.5	8.07	45.23	7
FALSE	High	Master Protein	A0A100IKY7	Phosphoglycerate mutase OS=Aspergillus niger OX=5061 GN=ABL_05814 PE=3 SV=1	0	29.675	15.9615	7	12	7	1	520	57	5.68	30.81	7
FALSE	High	Master Protein	A0A100IJB0	Dihydrodipicolinate synthetase family protein OS=Aspergillus niger OX=5061 GN=ABL_04910 PE=3 SV=1	0	29.575	23.2258	7	12	7	1	310	33.7	7.33	34.9	7
FALSE	High	Master Protein	A0A1M3TYR2	Uncharacterized protein OS=Aspergillus luchuensis CBS 106.47 OX=1137211 GN=ASPFODRAFT_27663 PE=4 SV=1	0	29.203	27.7778	7	10	7	1	306	32.1	6.87	28.14	7
FALSE	High	Master Protein	A0A1M3TNM2	Uncharacterized protein OS=Aspergillus luchuensis CBS 106.47 OX=1137211 GN=ASPFODRAFT_205398 PE=4 SV=1	0	29.071	26.3736	3	10	3	1	182	19.6	5.1	31.64	3
FALSE	High	Master Protein	G7X6H6	Glutamate dehydrogenase OS=Aspergillus kawachii (strain NBRC 4308) OX=1033177 GN=AKAW_00703 PE=3 SV=1	0	29.07	25.8696	9	9	9	1	460	49.4	6.1	21.56	9
FALSE	High	Master Protein	A0A100INV8	40S ribosomal protein S4 OS=Aspergillus niger OX=5061 GN=ABL_07316 PE=3 SV=1	0	29.011	26.7442	8	16	8	1	258	29	10.13	46.15	8
FALSE	High	Master Protein	G7X4S1	Telomere and ribosome associated protein Stm1 OS=Aspergillus kawachii (strain NBRC 4308) OX=1033177 GN=AKAW_00208 PE=4 SV=1	0	28.986	23.588	7	10	7	1	301	33.2	9.64	26.18	7
FALSE	High	Master Protein	A0A117DUY3	Conserved lysine-rich protein OS=Aspergillus niger OX=5061 GN=ABL_00502 PE=4 SV=1	0	28.95	19.403	9	12	9	1	536	56.2	4.93	24.37	9
FALSE	High	Master Protein	A0A100IL95	Protein GCY OS=Aspergillus niger OX=5061 GN=ABL_05949 PE=4 SV=1	0	28.741	15.674	4	6	4	1	319	34.8	7.11	21.01	4
FALSE	High	Master Protein	A0A1L9NPS3	Carboxypeptidase OS=Aspergillus tubingensis CBS 134.48 OX=767770 GN=ASPTUDRAFT_298164 PE=3 SV=1	0	28.668	10.2334	6	15	6	1	557	62.1	5.12	40.22	6
FALSE	High	Master Protein	A0A146F2R7	Glucanase OS=Aspergillus luchuensis OX=1069201 GN=RIB2604_00608030 PE=3 SV=1	0	28.612	14.3805	5	10	4	1	452	48.2	4.36	23.02	5
FALSE	High	Master Protein	A0A1M3T5V7	Uncharacterized protein OS=Aspergillus luchuensis CBS 106.47 OX=1137211 GN=ASPFODRAFT_210863 PE=3 SV=1	0	28.427	13.5328	10	10	10	1	702	79.7	5.02	25.52	10
FALSE	High	Master Protein	A0A100IDW3	Similar to An07g04590 OS=Aspergillus niger OX=5061 GN=ABL_03147 PE=4 SV=1	0	28.154	4.26955	7	11	7	1	1944	210.9	9.36	27.27	7
FALSE	High	Master Protein	A0A146F1R9	Serine proteinase OS=Aspergillus luchuensis OX=1069201 GN=RIB2604_00603240 PE=3 SV=1	0	28.109	11.1524	4	14	4	1	538	57.5	6.77	41.48	4
FALSE	High	Master Protein	A0A146F317	Peptidyl-prolyl cis-trans isomerase OS=Aspergillus luchuensis OX=1069201 GN=RIB2604_00607100 PE=3 SV=1	0	27.888	49.4253	7	17	6	1	174	18.9	8.43	42.47	7
FALSE	High	Master Protein	Q5AWS6	Cell division control protein 48 OS=Emericella nidulans (strain FGSC A4 / ATCC 38163 / CBS 112.46 / NRRL 194 / M139) OX=227321 GN=cdc48 PE=1 SV=2	0	27.659	15.5529	11	11	11	1	823	90.5	5.15	25.6	11
FALSE	High	Master Protein	G7X936	Mitochondrial dihydroxy acid dehydratase OS=Aspergillus kawachii (strain NBRC 4308) OX=1033177 GN=AKAW_01534 PE=3 SV=1	0	27.622	10.6908	5	6	5	1	608	64.6	6.92	16.67	5
FALSE	High	Master Protein	A0A146FWE3	Saponin hydrolase OS=Aspergillus luchuensis OX=1069201 GN=RIB2604_03300260 PE=4 SV=1	0	27.594	9.22659	5	7	5	1	737	79.4	6.32	17.87	5
FALSE	High	Master Protein	G7XDN4	Uncharacterized protein OS=Aspergillus kawachii (strain NBRC 4308) OX=1033177 GN=AKAW_02999 PE=4 SV=1	0	27.524	11.7324	11	11	11	1	1091	122.6	7.52	25.89	11
FALSE	High	Master Protein	A0A146EZJ7	UTP--glucose-1-phosphate uridylyltransferase OS=Aspergillus luchuensis OX=1069201 GN=RIB2604_00300890 PE=3 SV=1	0	27.336	14.7793	7	9	7	1	521	57.9	7.24	24.48	7
FALSE	High	Master Protein	A0A124BXM2	Uncharacterized protein OS=Aspergillus niger OX=5061 GN=ABL_05492 PE=4 SV=1	0	27.297	16.5517	6	10	6	1	435	50.5	6.06	28.22	6
FALSE	High	Master Protein	G7XV12	Cell surface protein OS=Aspergillus kawachii (strain NBRC 4308) OX=1033177 GN=AKAW_08835 PE=4 SV=1	0	27.083	23.4266	3	3	3	1	286	29.3	7.09	14.66	3
FALSE	High	Master Protein	A0A1L9N3T7	Glucose-6-phosphate isomerase OS=Aspergillus tubingensis CBS 134.48 OX=767770 GN=ASPTUDRAFT_55950 PE=3 SV=1	0	27.07	13.3816	6	11	3	1	553	61.5	6.35	29.18	6
FALSE	High	Master Protein	A0A1M3TB08	Uncharacterized protein OS=Aspergillus luchuensis CBS 106.47 OX=1137211 GN=ASPFODRAFT_140389 PE=3 SV=1	0	26.853	17.2414	5	13	5	1	319	34.4	9.86	37.4	5
FALSE	High	Master Protein	A0A100IGI7	Ubiquitin-activating enzyme E1 1 OS=Aspergillus niger OX=5061 GN=ABL_03599 PE=3 SV=1	0	26.62	7.59322	9	11	9	1	1475	165.7	5.87	23.03	9
FALSE	High	Master Protein	A0A100I3Y5	Isocitrate lyase OS=Aspergillus niger OX=5061 GN=ABL_00610 PE=3 SV=1	0	26.547	15.0558	7	9	7	1	538	60.1	6.92	19.47	7
FALSE	High	Master Protein	A0A1L9NE82	Uncharacterized protein OS=Aspergillus tubingensis CBS 134.48 OX=767770 GN=ASPTUDRAFT_432662 PE=4 SV=1	0	25.54	31.677	4	6	4	1	161	18.9	4.98	18.86	4
FALSE	High	Master Protein	A0A100II52	Flavin-binding monooxygenase OS=Aspergillus niger OX=5061 GN=ABL_04330 PE=4 SV=1	0	25.201	11.6061	8	10	8	1	853	95.5	8.37	23.59	8
FALSE	High	Master Protein	A0A146FSK2	Aflatoxin B1-aldehyde reductase GliO-like OS=Aspergillus luchuensis OX=1069201 GN=RIB2604_02602170 PE=4 SV=1	0	24.533	26	8	10	8	1	350	39.3	6.2	25.29	8
FALSE	High	Master Protein	A0A1L9UCP6	Uncharacterized protein OS=Aspergillus brasiliensis CBS 101740 OX=767769 GN=ASPBRDRAFT_131528 PE=4 SV=1	0	24.5	28.2946	6	8	6	1	258	27.3	5.74	17.98	6
FALSE	High	Master Protein	A0A146G0J4	Actin-bundling protein Sac6 OS=Aspergillus luchuensis OX=1069201 GN=RIB2604_03303930 PE=4 SV=1	0	24.364	13.6628	8	9	8	1	688	77.4	6.33	21.01	8
FALSE	High	Master Protein	A0A2K4ZX86	40S ribosomal protein S8 OS=Aspergillus niger OX=5061 GN=ATCC64974_20570 PE=3 SV=1	0	24.363	16.6259	5	7	5	1	409	45.8	10.33	20.12	5
FALSE	High	Master Protein	A0A100IK79	Oxidoreductase OS=Aspergillus niger OX=5061 GN=ABL_05412 PE=4 SV=1	0	24.007	11.293	5	7	5	1	611	65.1	6.73	19.68	5
FALSE	High	Master Protein	A0A146F124	Dihydrolipoyl dehydrogenase OS=Aspergillus luchuensis OX=1069201 GN=RIB2604_00605780 PE=3 SV=1	0	23.976	12.2568	5	6	5	1	514	54.9	8.06	19.91	5
FALSE	High	Master Protein	A0A1M3U0W0	NADH-cytochrome b5 reductase OS=Aspergillus luchuensis CBS 106.47 OX=1137211 GN=ASPFODRAFT_40076 PE=3 SV=1	0	23.86	22.3602	6	8	6	1	322	36.1	8.85	20.14	6
FALSE	High	Master Protein	A0A146F2G5	3-ketoacyl-CoA thiolase OS=Aspergillus luchuensis OX=1069201 GN=RIB2604_00701680 PE=3 SV=1	0	23.838	22.0339	7	11	6	1	413	43.3	6.89	25.93	7
FALSE	High	Master Protein	G7X9G9	6-phosphogluconolactonase OS=Aspergillus kawachii (strain NBRC 4308) OX=1033177 GN=AKAW_01702 PE=4 SV=1	0	23.676	10.7232	3	7	3	1	401	42.8	4.6	18.43	3
FALSE	High	Master Protein	A0A146F537	Demethylmenaquinone methyltransferase family protein OS=Aspergillus luchuensis OX=1069201 GN=RIB2604_00803430 PE=4 SV=1	0	23.662	16.1572	6	9	5	1	458	49	5.3	24.71	6
FALSE	High	Master Protein	A0A254U4M8	S-(Hydroxymethyl)glutathione dehydrogenase/class III alcohol dehydrogenase OS=Aspergillus niger OX=5061 GN=CAN33_8050 PE=4 SV=1	0	23.432	9.88701	8	10	8	1	708	75.8	7.68	30.24	8
FALSE	High	Master Protein	A0A100I3B3	Reductase-like protein OS=Aspergillus niger OX=5061 GN=ABL_00434 PE=4 SV=1	0	23.294	20.6154	6	12	6	1	325	36.8	6.47	31.94	6
FALSE	High	Master Protein	A0A1L9MVH2	Aspartate aminotransferase OS=Aspergillus tubingensis CBS 134.48 OX=767770 GN=ASPTUDRAFT_127946 PE=4 SV=1	0	23.285	19.3473	7	8	7	1	429	46.9	8.72	19.33	7
FALSE	High	Master Protein	A0A1M3TBQ3	60S ribosomal protein L13 OS=Aspergillus luchuensis CBS 106.47 OX=1137211 GN=ASPFODRAFT_208713 PE=3 SV=1	0	23.258	7.93651	5	7	5	1	693	76.9	9.99	20.38	5
FALSE	High	Master Protein	A0A0K8LEU7	Heat shock protein 60 OS=Aspergillus udagawae OX=91492 GN=AUD_5825 PE=3 SV=1	0	23.151	17.8571	9	10	9	1	588	62	5.64	24	9
FALSE	High	Master Protein	A0A100IT99	Gibberellin 20-oxidase OS=Aspergillus niger OX=5061 GN=ABL_09594 PE=3 SV=1	0	22.85	18.9349	6	7	6	1	338	38.7	5.57	17.79	6
FALSE	High	Master Protein	A2R2W0	Aspergillus niger contig An14c0100, genomic contig OS=Aspergillus niger (strain CBS 513.88 / FGSC A1513) OX=425011 GN=An14g02140 PE=4 SV=1	0	22.803	31.8681	2	5	2	1	91	10.6	5.2	12.75	2
FALSE	High	Master Protein	A0A1M3TR80	Uncharacterized protein OS=Aspergillus luchuensis CBS 106.47 OX=1137211 GN=ASPFODRAFT_57993 PE=3 SV=1	0	22.7	15.5629	8	9	4	1	604	66.4	5.57	21.94	8
FALSE	High	Master Protein	A0A1M3TDJ6	Histidinol dehydrogenase OS=Aspergillus luchuensis CBS 106.47 OX=1137211 GN=ASPFODRAFT_139176 PE=3 SV=1	0	22.365	18.0587	6	7	6	1	443	47.6	6.47	18.96	6
FALSE	High	Master Protein	A0A100IMC3	Nucleoside diphosphate kinase OS=Aspergillus niger OX=5061 GN=ABL_06504 PE=3 SV=1	0	22.249	26.7974	3	6	3	1	153	17	7.9	22.08	3
FALSE	High	Master Protein	G7XD23	Quinone oxidoreductase OS=Aspergillus kawachii (strain NBRC 4308) OX=1033177 GN=AKAW_02809 PE=4 SV=1	0	21.896	20.3966	6	6	6	1	353	38.2	6.8	16.46	6
FALSE	High	Master Protein	G7XZ33	Uncharacterized protein OS=Aspergillus kawachii (strain NBRC 4308) OX=1033177 GN=AKAW_10297 PE=4 SV=1	0	21.741	44.3182	3	9	3	1	88	9.6	7.06	22.73	3
FALSE	High	Master Protein	A0A1L9N920	Isocitrate dehydrogenase [NADP] OS=Aspergillus tubingensis CBS 134.48 OX=767770 GN=ASPTUDRAFT_42052 PE=3 SV=1	0	21.541	17.6707	8	12	8	1	498	55.5	8.38	25.55	8
FALSE	High	Master Protein	A0A1L9N423	Uncharacterized protein OS=Aspergillus tubingensis CBS 134.48 OX=767770 GN=ASPTUDRAFT_29947 PE=4 SV=1	0	21.541	24.1245	4	5	4	1	257	27.7	6.23	16.01	4
FALSE	High	Master Protein	A0A1M3TPR6	Protein disulfide-isomerase OS=Aspergillus luchuensis CBS 106.47 OX=1137211 GN=ASPFODRAFT_128775 PE=3 SV=1	0	21.399	15.534	7	8	7	1	515	56.4	4.65	20.32	7
FALSE	High	Master Protein	A0A146FSU8	60S ribosomal protein L5 OS=Aspergillus luchuensis OX=1069201 GN=RIB2604_02601580 PE=3 SV=1	0	21.332	13.5593	4	6	4	1	354	40.2	8.92	16.61	4
FALSE	High	Master Protein	A0A1M3T1H7	Uncharacterized protein OS=Aspergillus luchuensis CBS 106.47 OX=1137211 GN=ASPFODRAFT_200165 PE=4 SV=1	0	21.229	13.7546	4	7	4	1	269	30	4.87	22.29	4
FALSE	High	Master Protein	A0A117DZV1	S-adenosylmethionine synthase OS=Aspergillus niger OX=5061 GN=ABL_04247 PE=3 SV=1	0	21.143	15.2455	5	9	4	1	387	42.1	5.88	27.1	5
FALSE	High	Master Protein	A0A1L9UJE3	Uncharacterized protein OS=Aspergillus brasiliensis CBS 101740 OX=767769 GN=ASPBRDRAFT_125145 PE=4 SV=1	0	21.106	14.3541	5	8	5	1	418	46.2	7.33	21.64	5
FALSE	High	Master Protein	A0A100I4E3	Mannitol-1-phosphate 5-dehydrogenase OS=Aspergillus niger OX=5061 GN=ABL_00738 PE=3 SV=1	0	21.076	19.5876	7	11	7	1	388	43.2	5.62	24.47	7
FALSE	High	Master Protein	A0A117DZF6	ER to Golgi transport protein Yif1 OS=Aspergillus niger OX=5061 GN=ABL_03897 PE=4 SV=1	0	20.983	9.10714	5	8	5	1	560	62.6	9.77	19.1	5
FALSE	High	Master Protein	A0A146FBA9	alpha-1,2-Mannosidase OS=Aspergillus luchuensis OX=1069201 GN=RIB2604_01703360 PE=3 SV=1	0	20.955	9.94152	4	8	4	1	513	55.9	5.1	26.92	4
FALSE	High	Master Protein	A0A100IQP6	3,4-dihydroxy-2-butanone 4-phosphate synthase OS=Aspergillus niger OX=5061 GN=ABL_07942 PE=3 SV=1	0	20.856	23.7069	4	8	4	1	232	24.6	5.05	23.58	4
FALSE	High	Master Protein	A0A0F4Z550	Elongation factor 1-alpha OS=Rasamsonia emersonii CBS 393.64 OX=1408163 GN=T310_0494 PE=3 SV=1	0	20.839	12.8261	6	14	1	1	460	50	8.92	35.08	6
FALSE	High	Master Protein	A0A1L9NMI3	Uncharacterized protein OS=Aspergillus tubingensis CBS 134.48 OX=767770 GN=ASPTUDRAFT_52378 PE=3 SV=1	0	20.65	8.11725	6	7	6	1	887	97.5	6.64	17.21	6
FALSE	High	Master Protein	A0A1L9UHR9	Uncharacterized protein OS=Aspergillus brasiliensis CBS 101740 OX=767769 GN=ASPBRDRAFT_44112 PE=4 SV=1	0	20.631	23.4234	7	12	7	1	222	24.6	5.64	31.44	7
FALSE	High	Master Protein	A0A1M3TGM5	Glycoside hydrolase family 43 protein OS=Aspergillus luchuensis CBS 106.47 OX=1137211 GN=ASPFODRAFT_136217 PE=3 SV=1	0	20.627	16.3636	4	5	4	1	330	35.9	5	15.99	4
FALSE	High	Master Protein	A0A1M3T912	Uncharacterized protein OS=Aspergillus luchuensis CBS 106.47 OX=1137211 GN=ASPFODRAFT_49880 PE=4 SV=1	0	20.575	18.0645	8	10	2	1	465	49.4	6.02	27.83	8
FALSE	High	Master Protein	A0A146FPX6	Similar to An09g05330 OS=Aspergillus luchuensis OX=1069201 GN=RIB2604_02301530 PE=4 SV=1	0	20.412	20.339	3	10	3	1	177	19.4	5.41	26.59	3
FALSE	High	Master Protein	A0A100I6K6	Allergenic cerato-platanin Asp F13 OS=Aspergillus niger OX=5061 GN=ABL_01045 PE=4 SV=1	0	20.385	29.5302	3	8	3	1	149	15.2	4.59	26.63	3
FALSE	High	Master Protein	A0A1S9DDI7	50S ribosomal protein L30e OS=Aspergillus oryzae OX=5062 GN=OAory_01093700 PE=3 SV=1	0	20.305	14.7849	4	7	3	1	372	41.4	10.26	18.35	4
FALSE	High	Master Protein	A0A100IUJ8	Cupin domain protein OS=Aspergillus niger OX=5061 GN=ABL_10273 PE=4 SV=1	0	20.206	16.5775	2	5	2	1	187	20.3	5.38	13.54	2
FALSE	High	Master Protein	G7XGG7	Uncharacterized protein OS=Aspergillus kawachii (strain NBRC 4308) OX=1033177 GN=AKAW_04140 PE=4 SV=1	0	20.185	40.2174	3	4	3	1	92	10.2	6.77	9.78	3
FALSE	High	Master Protein	A0A1M3TM85	Glycoside hydrolase family 125 protein OS=Aspergillus luchuensis CBS 106.47 OX=1137211 GN=ASPFODRAFT_206585 PE=4 SV=1	0	20.153	9.14179	4	5	4	1	536	58.9	5.31	14.84	4
FALSE	High	Master Protein	A0A1M3T705	Uncharacterized protein OS=Aspergillus luchuensis CBS 106.47 OX=1137211 GN=ASPFODRAFT_326765 PE=4 SV=1	0	19.824	11.976	3	10	3	1	334	37.1	4.82	29.59	3
FALSE	High	Master Protein	A0A1M3T633	Uncharacterized protein OS=Aspergillus luchuensis CBS 106.47 OX=1137211 GN=ASPFODRAFT_143419 PE=4 SV=1	0	19.773	11.2245	5	10	5	1	392	43.5	5.5	26.41	5
FALSE	High	Master Protein	A0A1L9NBJ8	Succinate dehydrogenase assembly factor 2, mitochondrial OS=Aspergillus tubingensis CBS 134.48 OX=767770 GN=ASPTUDRAFT_64050 PE=3 SV=1	0	19.748	5.51432	6	10	6	1	943	104.8	8	26.19	6
FALSE	High	Master Protein	G7XEC8	DJ-1/PfpI family protein OS=Aspergillus kawachii (strain NBRC 4308) OX=1033177 GN=AKAW_03621 PE=4 SV=1	0	19.643	12.9278	3	6	3	1	263	28.4	5.66	17.11	3
FALSE	High	Master Protein	A0A146FF54	Sec14 cytosolic factor OS=Aspergillus luchuensis OX=1069201 GN=RIB2604_01802550 PE=4 SV=1	0	19.5	17.9811	5	5	5	1	317	35.5	5.5	9.66	5
FALSE	High	Master Protein	A0A1L9MZ71	Pyruvate kinase OS=Aspergillus tubingensis CBS 134.48 OX=767770 GN=ASPTUDRAFT_77487 PE=3 SV=1	0	19.414	17.8707	8	8	8	1	526	58.1	7.25	13.51	8
FALSE	High	Master Protein	A0A1L9NBD9	Uncharacterized protein OS=Aspergillus tubingensis CBS 134.48 OX=767770 GN=ASPTUDRAFT_27587 PE=4 SV=1	0	19.193	14.1463	3	4	3	1	205	22	6.92	10.77	3
FALSE	High	Master Protein	A0A100II13	60S ribosomal protein L6 OS=Aspergillus niger OX=5061 GN=ABL_04295 PE=4 SV=1	0	19.168	28.7129	5	8	5	1	202	22.5	10.17	15.45	5
FALSE	High	Master Protein	A0A1L9NPQ6	Uncharacterized protein OS=Aspergillus tubingensis CBS 134.48 OX=767770 GN=ASPTUDRAFT_38226 PE=3 SV=1	0	19.026	44.5161	7	10	7	1	155	17.9	10.45	27.21	7
FALSE	High	Master Protein	A0A0F0IF51	40S ribosomal protein S0 OS=Aspergillus parasiticus (strain ATCC 56775 / NRRL 5862 / SRRC 143 / SU-1) OX=1403190 GN=RPS0 PE=3 SV=1	0	19.019	3.81526	3	6	3	1	996	112	6.77	20.35	3
FALSE	High	Master Protein	A0A1L9NKL5	Uncharacterized protein OS=Aspergillus tubingensis CBS 134.48 OX=767770 GN=ASPTUDRAFT_60524 PE=4 SV=1	0	19.016	27.1062	7	7	7	1	273	31.5	9.96	18.59	7
FALSE	High	Master Protein	A0A254TPE5	Choline/Carnitine o-acyltransferase family protein OS=Aspergillus niger OX=5061 GN=CAN33_42805 PE=3 SV=1	0	18.935	12.0051	8	8	8	1	783	88.7	6.62	18.7	8
FALSE	High	Master Protein	A0A100IMS1	Glutathione reductase OS=Aspergillus niger OX=5061 GN=ABL_06745 PE=3 SV=1	0	18.893	4.86486	4	5	4	1	925	100	8.18	11.77	4
FALSE	High	Master Protein	A0A1M3TXB9	Uncharacterized protein OS=Aspergillus luchuensis CBS 106.47 OX=1137211 GN=ASPFODRAFT_41919 PE=4 SV=1	0	18.844	11.3594	5	7	5	1	537	60	6.11	17.89	5
FALSE	High	Master Protein	A2QGC3	Aspergillus niger contig An03c0080, genomic contig OS=Aspergillus niger (strain CBS 513.88 / FGSC A1513) OX=425011 GN=An03g02650 PE=4 SV=1	0	18.804	17.2352	7	9	1	1	557	60.4	8.21	24.97	7
FALSE	High	Master Protein	A0A117E1I5	L-ascorbate oxidase OS=Aspergillus niger OX=5061 GN=ABL_06754 PE=3 SV=1	0	18.757	9.23825	5	13	5	1	617	68.3	5.27	31.13	5
FALSE	High	Master Protein	A0A1L9MWS5	Uncharacterized protein OS=Aspergillus tubingensis CBS 134.48 OX=767770 GN=ASPTUDRAFT_32878 PE=4 SV=1	0	18.735	14.2857	4	8	4	1	350	37.6	9.44	23.06	4
FALSE	High	Master Protein	A0A117E3U1	3-hydroxyisobutyrate dehydrogenase OS=Aspergillus niger OX=5061 GN=ABL_10279 PE=4 SV=1	0	18.718	11.8943	4	6	4	1	454	49.3	6.55	16.92	4
FALSE	High	Master Protein	A0A1L9N8L0	Uncharacterized protein OS=Aspergillus tubingensis CBS 134.48 OX=767770 GN=ASPTUDRAFT_117665 PE=3 SV=1	0	18.685	20.7675	7	9	7	1	443	49.7	5.8	25.92	7
FALSE	High	Master Protein	G3Y6L1	Uncharacterized protein OS=Aspergillus niger (strain ATCC 1015 / CBS 113.46 / FGSC A1144 / LSHB Ac4 / NCTC 3858a / NRRL 328 / USDA 3528.7) OX=380704 GN=ASPNIDRAFT_45588 PE=4 SV=1	0	18.608	5.72519	2	2	2	1	262	27.7	4.86	8.71	2
FALSE	High	Master Protein	A0A100IR24	NAD binding Rossmann fold oxidoreductase OS=Aspergillus niger OX=5061 GN=ABL_08152 PE=4 SV=1	0	18.498	18.8889	5	5	5	1	360	40	7.08	13.45	5
FALSE	High	Master Protein	A0A2P2HI43	Solute carrier family 25 member 42 OS=Aspergillus flavus (strain ATCC MYA-384 / AF70) OX=1392242 GN=AFLA70_385g000940 PE=3 SV=1	0	18.467	8.18182	4	7	4	1	550	60.3	10.61	18.12	4
FALSE	High	Master Protein	A0A1M3TBY4	Succinate--CoA ligase [ADP-forming] subunit beta, mitochondrial OS=Aspergillus luchuensis CBS 106.47 OX=1137211 GN=ASPFODRAFT_671518 PE=3 SV=1	0	18.254	13.9955	6	7	6	1	443	47.7	5.85	13.33	6
FALSE	High	Master Protein	A0A0S7E2T9	60S ribosomal protein L25 OS=Aspergillus lentulus OX=293939 GN=ALT_6362 PE=3 SV=1	0	18.228	30.5195	4	9	4	1	154	17	10.42	25.77	4
FALSE	High	Master Protein	A0A1L9N810	Uncharacterized protein OS=Aspergillus tubingensis CBS 134.48 OX=767770 GN=ASPTUDRAFT_74721 PE=3 SV=1	0	18.192	13.1343	3	6	3	1	335	35.8	6.7	18.86	3
FALSE	High	Master Protein	A0A1M3TRV9	Uncharacterized protein OS=Aspergillus luchuensis CBS 106.47 OX=1137211 GN=ASPFODRAFT_204416 PE=3 SV=1	0	18.158	18.663	6	6	6	1	359	38.9	6.71	16.1	6
FALSE	High	Master Protein	A0A1M3T9U5	Adenylate kinase OS=Aspergillus luchuensis CBS 106.47 OX=1137211 GN=ADK1 PE=3 SV=1	0	18.128	15.1163	3	4	3	1	258	28.6	8.22	13.86	3
FALSE	High	Master Protein	A0A117E3B4	Mandelate racemase/muconate lactonizing enzyme family protein OS=Aspergillus niger OX=5061 GN=ABL_09496 PE=4 SV=1	0	18.116	17.6471	6	8	6	1	425	46.6	6.29	19.11	6
FALSE	High	Master Protein	A0A1L9UGR1	Uncharacterized protein OS=Aspergillus brasiliensis CBS 101740 OX=767769 GN=ASPBRDRAFT_196370 PE=4 SV=1	0	18.093	25.5319	3	5	3	1	141	15.3	5.19	13.17	3
FALSE	High	Master Protein	A0A1L9NIB9	Uncharacterized protein OS=Aspergillus tubingensis CBS 134.48 OX=767770 GN=ASPTUDRAFT_133926 PE=4 SV=1	0	17.962	15.9011	4	4	4	1	283	31.5	6.32	11.89	4
FALSE	High	Master Protein	A0A1M3TBX5	Rhamnogalacturonate lyase OS=Aspergillus luchuensis CBS 106.47 OX=1137211 GN=ASPFODRAFT_138568 PE=3 SV=1	0	17.959	9.84848	4	5	4	1	528	57	4.65	17.17	4
FALSE	High	Master Protein	A0A100IE90	Hydrophobin OS=Aspergillus niger OX=5061 GN=ABL_03228 PE=3 SV=1	0	17.926	16.2651	3	28	2	1	166	16.6	4.48	66.16	3
FALSE	High	Master Protein	A0A100I890	NAD binding Rossmann fold oxidoreductase OS=Aspergillus niger OX=5061 GN=ABL_01709 PE=4 SV=1	0	17.796	8.73786	3	5	3	1	412	45.3	6.6	12.18	3
FALSE	High	Master Protein	A0A1L9N6X0	Uncharacterized protein OS=Aspergillus tubingensis CBS 134.48 OX=767770 GN=ASPTUDRAFT_54722 PE=3 SV=1	0	17.781	7.80856	5	6	5	1	794	87.3	5.76	16.81	5
FALSE	High	Master Protein	A0A124BVF1	Mitochondrial phosphate carrier protein OS=Aspergillus niger OX=5061 GN=ABL_01401 PE=3 SV=1	0	17.703	16.879	5	5	5	1	314	32.7	9.29	13.62	5
FALSE	High	Master Protein	G7XSF5	Acyl-CoA dehydrogenase family protein OS=Aspergillus kawachii (strain NBRC 4308) OX=1033177 GN=AKAW_07954 PE=3 SV=1	0	17.562	15.625	6	6	6	1	448	49.7	8.7	12.48	6
FALSE	High	Master Protein	A0A100IJD8	Alpha-1,4 glucan phosphorylase OS=Aspergillus niger OX=5061 GN=ABL_04462 PE=3 SV=1	0	17.545	8.85358	7	8	7	1	881	100.5	6.13	15.81	7
FALSE	High	Master Protein	A0A1L9N8J9	Uncharacterized protein OS=Aspergillus tubingensis CBS 134.48 OX=767770 GN=ASPTUDRAFT_118261 PE=3 SV=1	0	17.379	5.6338	2	3	2	1	497	53.9	6.73	10.98	2
FALSE	High	Master Protein	A0A1M3TTZ1	Glycoside hydrolase family 132 protein OS=Aspergillus luchuensis CBS 106.47 OX=1137211 GN=ASPFODRAFT_40701 PE=4 SV=1	0	17.336	13.1765	4	5	4	1	425	44.3	5.29	13.57	4
FALSE	High	Master Protein	A0A100IA47	Bifunctional purine biosynthesis protein Ade16 OS=Aspergillus niger OX=5061 GN=ABL_02161 PE=3 SV=1	0	17.238	7.56303	6	6	6	1	952	104.6	8.24	14.2	6
FALSE	High	Master Protein	A0A1M3TI57	Uncharacterized protein OS=Aspergillus luchuensis CBS 106.47 OX=1137211 GN=ASPFODRAFT_45916 PE=4 SV=1	0	17.23	11.8095	5	5	5	1	525	58.2	6.49	13.49	5
FALSE	High	Master Protein	G7XUM9	Short-chain dehydrogenases/reductase OS=Aspergillus kawachii (strain NBRC 4308) OX=1033177 GN=AKAW_08687 PE=4 SV=1	0	17.117	21.5278	5	7	5	1	288	31.4	5.48	15.98	5
FALSE	High	Master Protein	G7XIZ6	Exo-beta-1,3-glucanase OS=Aspergillus kawachii (strain NBRC 4308) OX=1033177 GN=AKAW_04805 PE=4 SV=1	0	17.041	4.09234	3	12	3	1	953	100.1	4.7	35.37	3
FALSE	High	Master Protein	A0A146F611	Exo-beta-1,3-glucanase OS=Aspergillus luchuensis OX=1069201 GN=RIB2604_01003980 PE=3 SV=1	0	16.885	12.7404	4	6	4	1	416	45.5	5.25	16.74	4
FALSE	High	Master Protein	A0A117DVZ2	Peptide hydrolase OS=Aspergillus niger OX=5061 GN=ABL_01267 PE=3 SV=1	0	16.841	6.8254	3	5	3	1	630	68.8	4.84	16.51	3
FALSE	High	Master Protein	A0A100IME6	Uncharacterized protein LOC100191558 OS=Aspergillus niger OX=5061 GN=ABL_06566 PE=4 SV=1	0	16.821	14.8148	5	5	5	1	459	47.7	8.63	14.45	5
FALSE	High	Master Protein	A0A146FHC5	Tat pathway signal sequence domain-containing protein OS=Aspergillus luchuensis OX=1069201 GN=RIB2604_01807360 PE=4 SV=1	0	16.601	5.82242	3	4	3	1	687	75.9	4.97	9.19	3
FALSE	High	Master Protein	A0A146FL86	Aha1 domain family OS=Aspergillus luchuensis OX=1069201 GN=RIB2604_02004910 PE=4 SV=1	0	16.575	19.0909	5	5	5	1	330	36.5	5.58	8.47	5
FALSE	High	Master Protein	A0A146F8D9	Beta-glucosidase OS=Aspergillus luchuensis OX=1069201 GN=RIB2604_01500380 PE=4 SV=1	0	16.465	5.75163	4	6	4	1	765	82.1	4.79	14.85	4
FALSE	High	Master Protein	A0A1L9NFH0	Uncharacterized protein OS=Aspergillus tubingensis CBS 134.48 OX=767770 GN=ASPTUDRAFT_136174 PE=4 SV=1	0	16.394	9.71429	3	6	3	1	350	38.8	5.05	19.21	3
FALSE	High	Master Protein	G3XN35	Uncharacterized protein OS=Aspergillus niger (strain ATCC 1015 / CBS 113.46 / FGSC A1144 / LSHB Ac4 / NCTC 3858a / NRRL 328 / USDA 3528.7) OX=380704 GN=ASPNIDRAFT_49373 PE=4 SV=1	0	16.317	11.3712	4	5	4	1	299	29.6	4.96	12.93	4
FALSE	High	Master Protein	A0A146FMI6	3-isopropylmalate dehydrogenase OS=Aspergillus luchuensis OX=1069201 GN=RIB2604_02008930 PE=3 SV=1	0	16.294	19.0104	6	6	6	1	384	41.9	5.26	12.3	6
FALSE	High	Master Protein	A0A1M3TXM4	2-dehydropantoate 2-reductase OS=Aspergillus luchuensis CBS 106.47 OX=1137211 GN=ASPFODRAFT_38665 PE=3 SV=1	0	16.154	16.1491	4	5	4	1	322	35.1	6.8	10.84	4
FALSE	High	Master Protein	A0A146FV20	Oligopeptidase family protein OS=Aspergillus luchuensis OX=1069201 GN=RIB2604_02701070 PE=4 SV=1	0	16.079	7.42779	4	4	4	1	727	79.8	6.18	10.87	4
FALSE	High	Master Protein	A0A146FG16	Similar to An12g02680 OS=Aspergillus luchuensis OX=1069201 GN=RIB2604_01806770 PE=4 SV=1	0	16.074	25.4054	5	6	5	1	185	20.5	4.61	14.99	5
FALSE	High	Master Protein	A0A1L9NG99	Uncharacterized protein OS=Aspergillus tubingensis CBS 134.48 OX=767770 GN=ASPTUDRAFT_51203 PE=3 SV=1	0	16.074	9.88372	4	5	4	1	516	55.9	6.64	15.49	4
FALSE	High	Master Protein	A0A1M3T6Q6	Catalase OS=Aspergillus luchuensis CBS 106.47 OX=1137211 GN=ASPFODRAFT_356374 PE=3 SV=1	0	16.06	7.9118	5	5	5	1	771	86.9	6.4	14.38	5
FALSE	High	Master Protein	A0A1R3RS12	Uncharacterized protein OS=Aspergillus carbonarius (strain ITEM 5010) OX=602072 GN=ASPCADRAFT_395503 PE=3 SV=1	0	16.054	27.5	5	8	5	1	200	23.1	10.35	20.17	5
FALSE	High	Master Protein	A0A100IQ98	UV excision repair protein OS=Aspergillus niger OX=5061 GN=ABL_08036 PE=4 SV=1	0	16.036	11.1111	3	4	3	1	369	39.5	4.56	11.37	3
FALSE	High	Master Protein	A0A146FIB9	Uncharacterized protein OS=Aspergillus luchuensis OX=1069201 GN=RIB2604_02002970 PE=4 SV=1	0	16.023	19.697	3	4	3	1	198	19.9	8.78	12.43	3
FALSE	High	Master Protein	A0A100I2G0	Alcohol dehydrogenase OS=Aspergillus niger OX=5061 GN=ABL_00195 PE=3 SV=1	0	15.966	16.092	5	7	5	1	348	37.8	6.07	16.39	5
FALSE	High	Master Protein	A0A117E2I1	Dienelactone hydrolase family protein OS=Aspergillus niger OX=5061 GN=ABL_08284 PE=4 SV=1	0	15.924	23.506	6	7	6	1	251	27.5	6.9	17.69	6
FALSE	High	Master Protein	A0A1M3TBX6	Uncharacterized protein OS=Aspergillus luchuensis CBS 106.47 OX=1137211 GN=ASPFODRAFT_48255 PE=4 SV=1	0	15.875	9.6475	5	9	5	1	539	59.2	5.71	21.39	5
FALSE	High	Master Protein	G3Y8M6	Uncharacterized protein OS=Aspergillus niger (strain ATCC 1015 / CBS 113.46 / FGSC A1144 / LSHB Ac4 / NCTC 3858a / NRRL 328 / USDA 3528.7) OX=380704 GN=ASPNIDRAFT_203639 PE=4 SV=1	0	15.831	4.52518	6	7	6	1	1569	171.4	5.96	17.64	6
FALSE	High	Master Protein	A0A1M3TK23	Uncharacterized protein OS=Aspergillus luchuensis CBS 106.47 OX=1137211 GN=ASPFODRAFT_59539 PE=4 SV=1	0	15.724	5.53719	6	8	6	1	1210	132.9	5.22	18.21	6
FALSE	High	Master Protein	P51044	Citrate synthase, mitochondrial OS=Aspergillus niger OX=5061 GN=cit-1 PE=2 SV=1	0	15.722	10.9474	5	9	5	1	475	52.1	8.22	18.43	5
FALSE	High	Master Protein	A0A0L1J7Z9	Glucose-6-phosphate isomerase OS=Aspergillus nomius NRRL 13137 OX=1509407 GN=ANOM_004402 PE=3 SV=1	0	15.542	8.13743	4	8	1	1	553	61.2	6.3	16.64	4
FALSE	High	Master Protein	A0A1M3TXS5	Uncharacterized protein OS=Aspergillus luchuensis CBS 106.47 OX=1137211 GN=ASPFODRAFT_57604 PE=4 SV=1	0	15.529	13.9394	4	6	4	1	330	36.8	5.1	14.22	4
FALSE	High	Master Protein	A0A117E139	Uncharacterized protein OS=Aspergillus niger OX=5061 GN=ABL_06079 PE=4 SV=1	0	15.456	7.89889	4	4	4	1	633	67.7	6.81	9.81	4
FALSE	High	Master Protein	A0A1M3TVA6	Uncharacterized protein OS=Aspergillus luchuensis CBS 106.47 OX=1137211 GN=ASPFODRAFT_29087 PE=4 SV=1	0	15.395	11.4865	4	5	4	1	444	48.8	5.59	13.62	4
FALSE	High	Master Protein	A0A1L9MVS8	Uncharacterized protein OS=Aspergillus tubingensis CBS 134.48 OX=767770 GN=ASPTUDRAFT_193047 PE=3 SV=1	0	15.388	13.2394	4	4	4	1	355	38.8	5.68	12.37	4
FALSE	High	Master Protein	B0Y722	Isocitrate dehydrogenase [NAD] subunit, mitochondrial OS=Neosartorya fumigata (strain CEA10 / CBS 144.89 / FGSC A1163) OX=451804 GN=AFUB_072290 PE=3 SV=1	0	15.345	7.25275	3	4	3	1	455	49.7	8.15	12.47	3
FALSE	High	Master Protein	A0A100IP55	Dihydrolipoamide succinyltransferase OS=Aspergillus niger OX=5061 GN=ABL_07464 PE=4 SV=1	0	15.227	10.661	4	5	4	1	469	50.6	8.91	10.27	4
FALSE	High	Master Protein	Q0CNL0	Phosphoglucomutase OS=Aspergillus terreus (strain NIH 2624 / FGSC A1156) OX=341663 GN=ATEG_04724 PE=3 SV=1	0	15.211	9.54955	4	6	1	1	555	60.1	6.3	17.98	4
FALSE	High	Master Protein	A0A100INX9	Sulfate adenylyltransferase OS=Aspergillus niger OX=5061 GN=MET3 PE=3 SV=1	0	15.197	10.1045	5	5	5	1	574	63.9	7.21	13.52	5
FALSE	High	Master Protein	A0A1L9X198	Uncharacterized protein OS=Aspergillus aculeatus ATCC 16872 OX=690307 GN=ASPACDRAFT_76666 PE=4 SV=1	0	15.015	10.7822	4	4	4	1	473	48.9	7.18	9.32	4
FALSE	High	Master Protein	A0A117DUZ4	Phosphoserine phosphatase OS=Aspergillus niger OX=5061 GN=ABL_00528 PE=4 SV=1	0	14.97	14.7727	3	5	3	1	264	29.5	5.02	12.43	3
FALSE	High	Master Protein	A0A146FVX9	Cofactor for methionyl-and glutamyl-tRNA synthetase OS=Aspergillus luchuensis OX=1069201 GN=RIB2604_02800350 PE=4 SV=1	0	14.947	14.7982	4	4	4	1	446	47.3	7.46	8.3	4
FALSE	High	Master Protein	A0A146FTM1	Uncharacterized protein OS=Aspergillus luchuensis OX=1069201 GN=RIB2604_02604530 PE=4 SV=1	0	14.927	18.552	5	8	5	1	221	25.2	6.57	22.02	5
FALSE	High	Master Protein	A0A0L1IMY4	Transport protein SEC23 OS=Aspergillus nomius NRRL 13137 OX=1509407 GN=ANOM_010112 PE=3 SV=1	0	14.584	5.17598	4	5	2	1	966	107.1	6.62	13.56	4
FALSE	High	Master Protein	A0A146F1X2	Cell wall integrity signaling protein Lsp1 OS=Aspergillus luchuensis OX=1069201 GN=RIB2604_00607600 PE=4 SV=1	0	14.553	11.7347	4	5	4	1	392	44.3	6.62	12.35	4
FALSE	High	Master Protein	A0A1L9UXM0	Uncharacterized protein OS=Aspergillus brasiliensis CBS 101740 OX=767769 GN=ASPBRDRAFT_192519 PE=3 SV=1	0	14.497	11.271	4	5	1	1	417	47.3	10.15	15.02	4
FALSE	High	Master Protein	A2QF85	Uncharacterized protein OS=Aspergillus niger (strain CBS 513.88 / FGSC A1513) OX=425011 GN=An02g13650 PE=4 SV=1	0	14.487	15.2047	2	3	2	1	171	18.1	4.88	9.73	2
FALSE	High	Master Protein	Q5B4I4	KH domain RNA-binding protein (AFU_orthologue AFUA_2G02780) OS=Emericella nidulans (strain FGSC A4 / ATCC 38163 / CBS 112.46 / NRRL 194 / M139) OX=227321 GN=ANIA_04546 PE=4 SV=1	0	14.421	11.6236	5	5	5	1	542	58.7	7.43	10.63	5
FALSE	High	Master Protein	A0A100I820	Ribonuclease T2 family OS=Aspergillus niger OX=5061 GN=ABL_01654 PE=3 SV=1	0	14.409	9.51276	3	4	3	1	431	47.4	5.88	10.34	3
FALSE	High	Master Protein	G7XXP6	Transcription factor RfeF OS=Aspergillus kawachii (strain NBRC 4308) OX=1033177 GN=AKAW_09858 PE=4 SV=1	0	14.408	8.82353	5	5	5	1	646	67.4	5.83	14.34	5
FALSE	High	Master Protein	G3YG33	Uncharacterized protein OS=Aspergillus niger (strain ATCC 1015 / CBS 113.46 / FGSC A1144 / LSHB Ac4 / NCTC 3858a / NRRL 328 / USDA 3528.7) OX=380704 GN=ASPNIDRAFT_52545 PE=4 SV=1	0	14.383	11.7284	4	4	4	1	486	51.8	9.72	9	4
FALSE	High	Master Protein	A0A1L9NNX3	Isocitrate dehydrogenase [NAD] subunit, mitochondrial OS=Aspergillus tubingensis CBS 134.48 OX=767770 GN=ASPTUDRAFT_72702 PE=3 SV=1	0	14.364	14.0665	5	6	5	1	391	42.4	8.25	16.88	5
FALSE	High	Master Protein	A0A117DZM2	S-formylglutathione hydrolase OS=Aspergillus niger OX=5061 GN=ABL_03245 PE=3 SV=1	0	14.29	19.0972	5	5	5	1	288	31.6	6.54	12.89	5
FALSE	High	Master Protein	A0A254TXY2	Uncharacterized protein OS=Aspergillus niger OX=5061 GN=CAN33_39795 PE=4 SV=1	0	14.288	17.7165	4	5	4	1	254	28	7.85	14.66	4
FALSE	High	Master Protein	A0A146G2H5	Quinate 5-dehydrogenase QutB OS=Aspergillus luchuensis OX=1069201 GN=RIB2604_04300010 PE=4 SV=1	0	14.238	15.3623	4	5	4	1	345	37.2	6.1	13.71	4
FALSE	High	Master Protein	A0A100IS80	FAD binding oxidoreductase OS=Aspergillus niger OX=5061 GN=ABL_08976 PE=3 SV=1	0	14.179	8.7234	4	5	4	1	470	51.4	6.55	14.34	4
FALSE	High	Master Protein	A0A0K8L2L9	Succinate--CoA ligase [ADP-forming] subunit alpha, mitochondrial OS=Aspergillus udagawae OX=91492 GN=AUD_1203 PE=3 SV=1	0	14.153	3.47222	3	3	3	1	1152	125	7.01	9.56	3
FALSE	High	Master Protein	A0A100IQV6	Fumarate hydratase OS=Aspergillus niger OX=5061 GN=ABL_08348 PE=3 SV=1	0	14.138	4.73047	4	5	4	1	909	99.7	7.21	11.88	4
FALSE	High	Master Protein	A0A100IK03	Beta-galactosidase OS=Aspergillus niger OX=5061 GN=ABL_05321 PE=3 SV=1	0	14.086	4.85909	4	4	4	1	1029	113.4	5.1	10.74	4
FALSE	High	Master Protein	A0A2P2HPR9	Pathogenesis associated protein OS=Aspergillus flavus (strain ATCC MYA-384 / AF70) OX=1392242 GN=AFLA70_459g000881 PE=4 SV=1	0	14.084	10	3	6	3	1	320	36	9.69	15.9	3
FALSE	High	Master Protein	A0A1L9N3R7	Uncharacterized protein OS=Aspergillus tubingensis CBS 134.48 OX=767770 GN=ASPTUDRAFT_122485 PE=4 SV=1	0	14.045	5.54608	6	6	5	1	1172	128.7	5.97	13.31	6
FALSE	High	Master Protein	A0A0F4YMS6	Vacuolar ATP synthase catalytic subunit A OS=Rasamsonia emersonii CBS 393.64 OX=1408163 GN=T310_6466 PE=3 SV=1	0	14.042	3.81016	5	6	1	1	1496	164.3	6.87	14.47	5
FALSE	High	Master Protein	A0A100IMW6	Uncharacterized protein OS=Aspergillus niger OX=5061 GN=ABL_06780 PE=3 SV=1	0	14.031	2.89444	4	6	4	1	1762	195.3	5.83	17.1	4
FALSE	High	Master Protein	A0A0M3M4Y7	Pectate lyase family protein OS=Aspergillus niger OX=5061 GN=pelA PE=2 SV=1	0	14.026	8.97098	3	9	3	1	379	39.7	4.34	26.68	3
FALSE	High	Master Protein	A0A146F4I8	Similar to An10g00970 OS=Aspergillus luchuensis OX=1069201 GN=RIB2604_00901010 PE=4 SV=1	0	14.006	20.4444	3	5	3	1	225	23.4	4.56	14.23	3
FALSE	High	Master Protein	A0A1L9NC44	Uncharacterized protein OS=Aspergillus tubingensis CBS 134.48 OX=767770 GN=ASPTUDRAFT_114910 PE=4 SV=1	0	13.983	9.03361	4	6	4	1	476	52.2	5.58	15.04	4
FALSE	High	Master Protein	A0A1M3T3A7	Glycoside hydrolase family 17 protein OS=Aspergillus luchuensis CBS 106.47 OX=1137211 GN=ASPFODRAFT_211928 PE=4 SV=1	0	13.98	12.0219	4	4	4	1	366	39.5	6.55	10.9	4
FALSE	High	Master Protein	A0A1L9UBG7	Uncharacterized protein OS=Aspergillus brasiliensis CBS 101740 OX=767769 GN=ASPBRDRAFT_32760 PE=4 SV=1	0	13.968	19.6676	6	6	6	1	361	38.5	5.91	13.82	6
FALSE	High	Master Protein	G7XZX5	Similar to An02g00330 OS=Aspergillus kawachii (strain NBRC 4308) OX=1033177 GN=AKAW_10631 PE=4 SV=1	0	13.949	20.2312	3	4	3	1	173	18.5	4.94	6.48	3
FALSE	High	Master Protein	A0A1L9UWK4	Uncharacterized protein OS=Aspergillus brasiliensis CBS 101740 OX=767769 GN=ASPBRDRAFT_51745 PE=3 SV=1	0	13.933	4.93708	5	5	5	1	1033	115	7.42	10.57	5
FALSE	High	Master Protein	A0A1L9UBK7	Citrate synthase OS=Aspergillus brasiliensis CBS 101740 OX=767769 GN=ASPBRDRAFT_46350 PE=3 SV=1	0	13.93	10.0858	5	5	5	1	466	51.3	8.43	13.61	5
FALSE	High	Master Protein	G7XCM1	Phospholipase, PLC-D OS=Aspergillus kawachii (strain NBRC 4308) OX=1033177 GN=AKAW_03077 PE=4 SV=1	0	13.918	10.7066	5	6	5	1	467	53.8	5.12	15	5
FALSE	High	Master Protein	A0A1L9N7N1	Proteasome subunit alpha type OS=Aspergillus tubingensis CBS 134.48 OX=767770 GN=ASPTUDRAFT_28913 PE=3 SV=1	0	13.875	21.3439	5	6	5	1	253	27.7	6.13	12.96	5
FALSE	High	Master Protein	G7XCK6	Glycosyl hydrolase, family 18 OS=Aspergillus kawachii (strain NBRC 4308) OX=1033177 GN=AKAW_02399 PE=3 SV=1	0	13.869	10.4651	4	8	4	1	430	46.7	5.03	20.4	4
FALSE	High	Master Protein	A0A1L9NMY0	Uncharacterized protein OS=Aspergillus tubingensis CBS 134.48 OX=767770 GN=ASPTUDRAFT_113102 PE=3 SV=1	0	13.806	11.1399	4	6	4	1	386	41.7	6.6	14.82	4
FALSE	High	Master Protein	G3YG02	Oxidoreductase OS=Aspergillus niger (strain ATCC 1015 / CBS 113.46 / FGSC A1144 / LSHB Ac4 / NCTC 3858a / NRRL 328 / USDA 3528.7) OX=380704 GN=ASPNIDRAFT_38546 PE=4 SV=1	0	13.802	19.0476	5	6	3	1	315	35.4	6.8	11.85	5
FALSE	High	Master Protein	A0A1E3BT63	Uncharacterized protein OS=Aspergillus cristatus OX=573508 GN=SI65_01763 PE=4 SV=1	0	13.794	5.24554	4	5	4	1	896	97.7	6.79	11.61	4
FALSE	High	Master Protein	A0A1L9N5Y1	1,3-beta-glucanosyltransferase OS=Aspergillus tubingensis CBS 134.48 OX=767770 GN=ASPTUDRAFT_121162 PE=3 SV=1	0	13.718	10.4803	5	6	5	1	458	48.5	4.97	11.28	5
FALSE	High	Master Protein	A0A254UAW8	Superoxide dismutase [Cu-Zn] OS=Aspergillus niger OX=5061 GN=CAN33_1470 PE=3 SV=1	0	13.668	16.4103	3	6	3	1	195	20.4	5.53	17.53	3
FALSE	High	Master Protein	A0A146FTF8	Oxidoreductase, short chain dehydrogenase/reductase family OS=Aspergillus luchuensis OX=1069201 GN=RIB2604_02604030 PE=4 SV=1	0	13.576	14.4487	3	4	3	1	263	28.3	5.48	9.35	3
FALSE	High	Master Protein	A0A0F8VLI8	Uncharacterized protein OS=Aspergillus rambellii OX=308745 GN=ARAM_005364 PE=3 SV=1	0	13.572	4.59893	3	4	1	1	935	103.4	6.51	13.25	3
FALSE	High	Master Protein	A0A117DYJ9	Signal transduction protein Syg1 OS=Aspergillus niger OX=5061 GN=ABL_03206 PE=4 SV=1	0	13.563	1.9039	2	6	2	1	1103	125.8	8.85	13.2	2
FALSE	High	Master Protein	A0A0S7E593	Obg-like ATPase 1 OS=Aspergillus lentulus OX=293939 GN=ALT_8263 PE=3 SV=1	0	13.562	3.79581	5	5	5	1	1528	166.2	7.94	12.51	5
FALSE	High	Master Protein	A0A0F8UEE6	Transcriptional corepressor Cyc8 OS=Aspergillus rambellii OX=308745 GN=ARAM_006771 PE=3 SV=1	0	13.539	3.34661	4	5	1	1	1255	138.6	9.33	14.47	4
FALSE	High	Master Protein	A0A100IFI2	Translation initiation factor 4B OS=Aspergillus niger OX=5061 GN=ABL_03542 PE=4 SV=1	0	13.469	10.8652	4	5	4	1	497	53.7	8.87	13.4	4
FALSE	High	Master Protein	A2QYC9	Aspergillus niger contig An12c0030, genomic contig OS=Aspergillus niger (strain CBS 513.88 / FGSC A1513) OX=425011 GN=An12g00790 PE=4 SV=1	0	13.447	7.47218	4	4	4	1	629	69.8	6.35	9.92	4
FALSE	High	Master Protein	A0A2I1DDI3	Plasma membrane ATPase OS=Aspergillus campestris IBT 28561 OX=1392248 GN=P168DRAFT_286107 PE=3 SV=1	0	13.431	6.95565	6	7	6	1	992	108.8	5.07	15.2	6
FALSE	High	Master Protein	A0A146F8W5	Cytochrome b5 OS=Aspergillus luchuensis OX=1069201 GN=RIB2604_01504480 PE=3 SV=1	0	13.421	19.8758	3	4	3	1	161	17.4	5.03	10.6	3
FALSE	High	Master Protein	A0A146FWB0	1,3-beta-glucanosyltransferase Bgt1 OS=Aspergillus luchuensis OX=1069201 GN=RIB2604_02903120 PE=3 SV=1	0	13.328	16.2252	4	4	4	1	302	32.4	4.78	9.82	4
FALSE	High	Master Protein	A2Q7S0	Aspergillus niger contig An01c0070, genomic contig OS=Aspergillus niger (strain CBS 513.88 / FGSC A1513) OX=425011 GN=An01g01720 PE=4 SV=1	0	13.314	10.5058	4	4	4	1	514	57.9	6.49	8.36	4
FALSE	High	Master Protein	A1CD39	Glyceraldehyde-3-phosphate dehydrogenase OS=Aspergillus clavatus (strain ATCC 1007 / CBS 513.65 / DSM 816 / NCTC 3887 / NRRL 1) OX=344612 GN=ACLA_064170 PE=3 SV=1	0	13.297	7.4184	2	8	1	1	337	36.7	7.15	23.51	2
FALSE	High	Master Protein	A0A1L9UK97	Uncharacterized protein OS=Aspergillus brasiliensis CBS 101740 OX=767769 GN=ASPBRDRAFT_196173 PE=4 SV=1	0	13.291	12.9032	3	3	3	1	310	34.8	4.77	7.73	3
FALSE	High	Master Protein	A0A1M3TBD5	Arabinogalactan endo-beta-1,4-galactanase OS=Aspergillus luchuensis CBS 106.47 OX=1137211 GN=ASPFODRAFT_49559 PE=3 SV=1	0	13.281	11.2994	4	7	4	1	354	39.2	4.11	20.41	4
FALSE	High	Master Protein	A0A100IHQ6	NADP(+) coupled glycerol dehydrogenase OS=Aspergillus niger OX=5061 GN=ABL_04165 PE=4 SV=1	0	13.211	14.791	4	6	4	1	311	35	7.74	10.55	4
FALSE	High	Master Protein	A0A146EZE9	Uncharacterized protein OS=Aspergillus luchuensis OX=1069201 GN=RIB2604_00600010 PE=4 SV=1	0	13.2	5.81683	4	5	4	1	808	86.5	4.93	10.24	4
FALSE	High	Master Protein	A0A1L9V0K5	Uncharacterized protein OS=Aspergillus brasiliensis CBS 101740 OX=767769 GN=ASPBRDRAFT_70871 PE=3 SV=1	0	13.125	10.7981	4	4	4	1	426	45.7	4.78	11.46	4
FALSE	High	Master Protein	A0A100I7I4	Fibrillarin OS=Aspergillus niger OX=5061 GN=ABL_01499 PE=3 SV=1	0	13.078	7.92079	4	4	4	1	606	64.8	8.87	10.1	4
FALSE	High	Master Protein	A0A1L9UJK7	Uncharacterized protein OS=Aspergillus brasiliensis CBS 101740 OX=767769 GN=ASPBRDRAFT_55138 PE=3 SV=1	0	13.03	26.1111	4	5	4	1	180	20.8	9.95	9.61	4
FALSE	High	Master Protein	A0A146FDH1	Methionine synthase, vitamin-B12 independent OS=Aspergillus luchuensis OX=1069201 GN=RIB2604_01706620 PE=4 SV=1	0	12.919	14.1791	5	6	5	1	402	45.3	5.48	15.64	5
FALSE	High	Master Protein	A0A117DYK9	2-nitropropane dioxygenase family oxidoreductase OS=Aspergillus niger OX=5061 GN=ABL_03230 PE=4 SV=1	0	12.872	12.0482	3	3	3	1	332	35.7	8.66	9.32	3
FALSE	High	Master Protein	A0A117DVB7	ATP synthase oligomycin sensitivity conferral protein OS=Aspergillus niger OX=5061 GN=ABL_00820 PE=3 SV=1	0	12.757	26.3158	6	7	6	1	228	24.2	9.48	16.52	6
FALSE	High	Master Protein	A0A1L9MW74	Uncharacterized protein OS=Aspergillus tubingensis CBS 134.48 OX=767770 GN=ASPTUDRAFT_128889 PE=3 SV=1	0	12.669	6.38686	3	5	3	1	548	59	6.81	12.01	3
FALSE	High	Master Protein	A0A1M3TJQ9	Uncharacterized protein OS=Aspergillus luchuensis CBS 106.47 OX=1137211 GN=ASPFODRAFT_618865 PE=4 SV=1	0	12.626	12.8814	3	4	3	1	295	32.7	6.8	8.29	3
FALSE	High	Master Protein	A0A117E266	Alpha/beta hydrolase OS=Aspergillus niger OX=5061 GN=ABL_06721 PE=4 SV=1	0	12.545	8.42491	4	5	4	1	546	61.1	5.85	11.79	4
FALSE	High	Master Protein	A0A1R3RZC0	Uncharacterized protein OS=Aspergillus carbonarius (strain ITEM 5010) OX=602072 GN=ASPCADRAFT_203662 PE=4 SV=1	0	12.518	8.42697	2	3	2	1	178	20.1	9.42	10.63	2
FALSE	High	Master Protein	A0A146FQY4	D-xylose reductase OS=Aspergillus luchuensis OX=1069201 GN=RIB2604_02110920 PE=4 SV=1	0	12.504	2.96443	1	2	1	1	506	56.4	6.49	7.57	1
FALSE	High	Master Protein	A0A1L9NE67	Uncharacterized protein OS=Aspergillus tubingensis CBS 134.48 OX=767770 GN=ASPTUDRAFT_28357 PE=4 SV=1	0	12.482	11.2299	4	4	4	1	374	40.3	7.3	10.28	4
FALSE	High	Master Protein	A0A100IKP8	Eukaryotic translation initiation factor 3 subunit C OS=Aspergillus niger OX=5061 GN=NIP1 PE=3 SV=1	0	12.478	5.6713	4	4	4	1	864	97.6	5.38	10.1	4
FALSE	High	Master Protein	A0A146FQ17	Ketol-acid reductoisomerase, mitochondrial OS=Aspergillus luchuensis OX=1069201 GN=RIB2604_02301830 PE=3 SV=1	0	12.437	9.47631	3	4	3	1	401	44.6	8.7	10.94	3
FALSE	High	Master Protein	A0A1L9UT68	Peptidylprolyl isomerase OS=Aspergillus brasiliensis CBS 101740 OX=767769 GN=ASPBRDRAFT_463782 PE=4 SV=1	0	12.39	28.5714	3	3	3	1	140	14.9	6.3	8.13	3
FALSE	High	Master Protein	A0A146EXG2	Phosphotransferase OS=Aspergillus luchuensis OX=1069201 GN=RIB2604_00102120 PE=3 SV=1	0	12.384	9.49495	4	4	4	1	495	54.3	5.68	8.32	4
FALSE	High	Master Protein	A0A1L9NQH5	Uncharacterized protein OS=Aspergillus tubingensis CBS 134.48 OX=767770 GN=ASPTUDRAFT_38602 PE=4 SV=1	0	12.372	25.9615	2	3	2	1	104	11.4	7.61	9.55	2
FALSE	High	Master Protein	A0A0L1ILR2	Proteasome subunit alpha type OS=Aspergillus nomius NRRL 13137 OX=1509407 GN=ANOM_010322 PE=3 SV=1	0	12.345	13.1868	3	3	3	1	273	30.1	5.87	8.21	3
FALSE	High	Master Protein	A0A146FM63	Uncharacterized protein OS=Aspergillus luchuensis OX=1069201 GN=RIB2604_02104190 PE=4 SV=1	0	12.333	15.7692	3	4	3	1	260	29	5.14	10.21	3
FALSE	High	Master Protein	A0A1L9MYP5	Uncharacterized protein OS=Aspergillus tubingensis CBS 134.48 OX=767770 GN=ASPTUDRAFT_67877 PE=4 SV=1	0	12.225	11.7647	4	4	4	1	323	34.9	5.74	10.52	4
FALSE	High	Master Protein	A0A1L9N8A0	Uncharacterized protein OS=Aspergillus tubingensis CBS 134.48 OX=767770 GN=ASPTUDRAFT_119649 PE=3 SV=1	0	12.114	11.5607	4	4	4	1	346	39.7	5.5	10.52	4
FALSE	High	Master Protein	A0A1L9NPD9	Uncharacterized protein OS=Aspergillus tubingensis CBS 134.48 OX=767770 GN=ASPTUDRAFT_52810 PE=4 SV=1	0	12.088	32.3944	4	5	4	1	142	15.5	6.39	11.26	4
FALSE	High	Master Protein	A0A124BVH4	Acyl-CoA dehydrogenase, mitochondrial OS=Aspergillus niger OX=5061 GN=ABL_01447 PE=4 SV=1	0	12.073	6.36492	4	4	4	1	707	78.2	7.02	8.96	4
FALSE	High	Master Protein	A0A1M3TRE2	Uncharacterized protein OS=Aspergillus luchuensis CBS 106.47 OX=1137211 GN=ASPFODRAFT_127725 PE=4 SV=1	0	12.06	9.21053	4	4	4	1	532	59.3	6.76	10.75	4
FALSE	High	Master Protein	B0XTP8	Histone H4 OS=Neosartorya fumigata (strain CEA10 / CBS 144.89 / FGSC A1163) OX=451804 GN=AFUB_029490 PE=3 SV=1	0	12.022	28.169	4	7	3	1	142	15.8	10.21	17.89	4
FALSE	High	Master Protein	A0A124BZ38	Glucose-6-phosphate 1-dehydrogenase OS=Aspergillus niger OX=5061 GN=ABL_10158 PE=3 SV=1	0	11.996	5.53964	6	7	6	1	1047	117.6	7.21	13.58	6
FALSE	High	Master Protein	A0A1L9UWJ4	Homoserine dehydrogenase OS=Aspergillus brasiliensis CBS 101740 OX=767769 GN=ASPBRDRAFT_38465 PE=3 SV=1	0	11.924	11.8598	4	4	4	1	371	39	5.38	10.69	4
FALSE	High	Master Protein	A0A100IU93	Fumarylacetoacetate hydrolase family protein OS=Aspergillus niger OX=5061 GN=ABL_10123 PE=4 SV=1	0	11.852	15.5172	3	3	3	1	232	25.8	8.24	6.7	3
FALSE	High	Master Protein	A0A100IU49	Catalase OS=Aspergillus niger OX=5061 GN=ABL_10033 PE=4 SV=1	0	11.803	6.05096	3	3	3	1	628	69.8	7.72	8.79	3
FALSE	High	Master Protein	A0A1M3T4Q9	40S ribosomal protein S1 OS=Aspergillus luchuensis CBS 106.47 OX=1137211 GN=RPS1 PE=3 SV=1	0	11.798	13.6719	3	5	3	1	256	29.2	10.04	11.79	3
FALSE	High	Master Protein	G0W2Q8	Calmodulin (Fragment) OS=Aspergillus fumigatiaffinis OX=340414 GN=caM PE=4 SV=1	0	11.706	29.3651	3	4	3	1	126	14.3	4.27	10.41	3
FALSE	High	Master Protein	A0A146F345	Carboxymethylcellulase B OS=Aspergillus luchuensis OX=1069201 GN=RIB2604_00607630 PE=3 SV=1	0	11.631	11.3744	4	4	2	1	422	47.1	4.37	8.08	4
FALSE	High	Master Protein	A0A146FMX0	Uncharacterized protein OS=Aspergillus luchuensis OX=1069201 GN=RIB2604_02108310 PE=4 SV=1	0	11.629	14.4144	2	2	2	1	222	24.3	4.93	5.89	2
FALSE	High	Master Protein	A0A1L9N524	Uncharacterized protein OS=Aspergillus tubingensis CBS 134.48 OX=767770 GN=ASPTUDRAFT_172216 PE=3 SV=1	0	11.598	12.0482	5	7	3	1	498	55.7	8.09	9.7	5
FALSE	High	Master Protein	A0A100IRN4	Asparaginyl-tRNA synthetase OS=Aspergillus niger OX=5061 GN=ABL_08760 PE=4 SV=1	0	11.547	8.88502	4	4	4	1	574	64.9	6.19	8.51	4
FALSE	High	Master Protein	A0A124BZ06	Tubulin-specific chaperone A OS=Aspergillus niger OX=5061 GN=ABL_09844 PE=3 SV=1	0	11.477	20.339	2	2	2	1	118	13.4	5.43	8.89	2
FALSE	High	Master Protein	A0A229YET8	Uncharacterized protein OS=Aspergillus turcosus OX=1245748 GN=CDV55_09895 PE=4 SV=1	0	11.47	7.15667	3	6	3	1	517	56.8	9.85	13.42	3
FALSE	High	Master Protein	A2QIU5	Aspergillus niger contig An04c0140, genomic contig OS=Aspergillus niger (strain CBS 513.88 / FGSC A1513) OX=425011 GN=An04g04750 PE=4 SV=1	0	11.332	4.36019	4	4	4	1	1055	118.4	6.8	10.14	4
FALSE	High	Master Protein	A0A1L9MW25	Peroxidase OS=Aspergillus tubingensis CBS 134.48 OX=767770 GN=ASPTUDRAFT_128090 PE=3 SV=1	0	11.309	7.48663	4	4	4	1	561	62.1	6.02	8.52	4
FALSE	High	Master Protein	A0A1M3U0X5	Ribosomal protein L15 OS=Aspergillus luchuensis CBS 106.47 OX=1137211 GN=ASPFODRAFT_67028 PE=3 SV=1	0	11.281	16.6667	3	4	3	1	228	26.9	11.19	11.03	3
FALSE	High	Master Protein	A0A1L9N4R0	Alanine--tRNA ligase OS=Aspergillus tubingensis CBS 134.48 OX=767770 GN=ALA1 PE=3 SV=1	0	11.275	3.92542	3	3	3	1	1019	113.9	6.23	6.34	3
FALSE	High	Master Protein	A0A100IMW5	Polyubiquitin binding protein OS=Aspergillus niger OX=5061 GN=ABL_06807 PE=4 SV=1	0	11.226	6.13027	4	4	4	1	783	84.3	5.29	9.31	4
FALSE	High	Master Protein	A0A0K8L5P6	Hydrophobin OS=Aspergillus udagawae OX=91492 GN=AUD_2550 PE=3 SV=1	0	11.205	8.84354	2	9	1	1	147	15	4.53	30.71	2
FALSE	High	Master Protein	A0A2G7GAI2	3-isopropylmalate dehydrogenase OS=Aspergillus arachidicola OX=656916 GN=AARAC_008596 PE=3 SV=1	0	11.166	4.45151	2	3	2	1	629	67.7	6.99	8.98	2
FALSE	High	Master Protein	A0A100IJ10	Unnamed protein product OS=Aspergillus niger OX=5061 GN=ABL_04812 PE=4 SV=1	0	11.13	3.80435	4	4	3	1	1104	119.2	6.07	10.5	4
FALSE	High	Master Protein	A0A1M3U1K1	Endo-1,4-beta-xylanase OS=Aspergillus luchuensis CBS 106.47 OX=1137211 GN=ASPFODRAFT_122170 PE=3 SV=1	0	11.122	14.6667	2	3	2	1	225	24.2	6.16	5.51	2
FALSE	High	Master Protein	A0A1M3U1E5	Uncharacterized protein OS=Aspergillus luchuensis CBS 106.47 OX=1137211 GN=ASPFODRAFT_178154 PE=4 SV=1	0	11.119	8.94309	3	4	3	1	369	40	5.45	11.01	3
FALSE	High	Master Protein	A0A146FC27	Superoxide dismutase OS=Aspergillus luchuensis OX=1069201 GN=RIB2604_01703370 PE=3 SV=1	0	11.119	17.1429	4	8	4	1	210	23.8	6.52	21.9	4
FALSE	High	Master Protein	A0A146FJB4	3-ketoacyl-coA thiolase peroxisomal A OS=Aspergillus luchuensis OX=1069201 GN=RIB2604_02005360 PE=3 SV=1	0	11.099	11.6945	4	5	4	1	419	43.4	7.91	11.85	4
FALSE	High	Master Protein	A0A100I395	5-methyltetrahydropteroyltriglutamate-homocysteine methyltransferase OS=Aspergillus niger OX=5061 GN=ABL_00425 PE=4 SV=1	0	11.099	6.96296	4	4	4	1	675	76.5	6.4	8.19	4
FALSE	High	Master Protein	A0A124BWF4	Alkaline phosphatase OS=Aspergillus niger OX=5061 GN=ABL_02941 PE=3 SV=1	0	11.09	2.9093	4	4	4	1	1753	193.9	6.77	9.61	4
FALSE	High	Master Protein	A0A1L9NQJ9	Uncharacterized protein OS=Aspergillus tubingensis CBS 134.48 OX=767770 GN=ASPTUDRAFT_27003 PE=4 SV=1	0	11.086	7.97546	1	5	1	1	163	17.2	4.96	17.33	1
FALSE	High	Master Protein	A0A1L9NJS8	Cytochrome b-c1 complex subunit Rieske, mitochondrial OS=Aspergillus tubingensis CBS 134.48 OX=767770 GN=ASPTUDRAFT_195059 PE=4 SV=1	0	11.001	20.1681	4	4	4	1	238	25.9	8.44	10.55	4
FALSE	High	Master Protein	A0A117DVE1	Proteasome subunit alpha type OS=Aspergillus niger OX=5061 GN=ABL_00903 PE=3 SV=1	0	10.999	10.8108	2	2	2	1	259	28.2	4.82	6.38	2
FALSE	High	Master Protein	A0A1M3TQZ2	Uncharacterized protein OS=Aspergillus luchuensis CBS 106.47 OX=1137211 GN=ASPFODRAFT_181499 PE=4 SV=1	0	10.982	8.61759	4	4	4	1	557	61.4	5.44	9.68	4
FALSE	High	Master Protein	G7XWY9	Similar to An14g06050 OS=Aspergillus kawachii (strain NBRC 4308) OX=1033177 GN=AKAW_09562 PE=4 SV=1	0	10.965	31.1475	2	4	2	1	122	13.4	7.62	11.39	2
FALSE	High	Master Protein	G7XFX3	Glutaminase OS=Aspergillus kawachii (strain NBRC 4308) OX=1033177 GN=AKAW_04012 PE=4 SV=1	0	10.958	7.89474	5	5	1	1	722	79.5	5.88	9.18	5
FALSE	High	Master Protein	A0A146F085	Electron transfer flavoprotein alpha subunit OS=Aspergillus luchuensis OX=1069201 GN=RIB2604_00602270 PE=4 SV=1	0	10.948	10.3448	3	3	3	1	348	36.1	5.78	8.94	3
FALSE	High	Master Protein	A0A1M3T7Y4	Uncharacterized protein OS=Aspergillus luchuensis CBS 106.47 OX=1137211 GN=ASPFODRAFT_143079 PE=3 SV=1	0	10.943	6.66667	3	4	3	1	570	62.7	4.77	8.15	3
FALSE	High	Master Protein	A0A1L9MSB3	Malate synthase OS=Aspergillus tubingensis CBS 134.48 OX=767770 GN=ASPTUDRAFT_48566 PE=3 SV=1	0	10.849	7.01107	3	3	3	1	542	61.1	7.44	8.04	3
FALSE	High	Master Protein	A0A1L9UB71	Uncharacterized protein OS=Aspergillus brasiliensis CBS 101740 OX=767769 GN=ASPBRDRAFT_184765 PE=3 SV=1	0	10.844	9.18367	4	4	4	1	490	53.5	6.05	9.76	4
FALSE	High	Master Protein	A0A146FYX9	Pectinesterase OS=Aspergillus luchuensis OX=1069201 GN=RIB2604_03102460 PE=4 SV=1	0	10.811	7.79944	2	2	2	1	359	38.8	4.63	5.23	2
FALSE	High	Master Protein	A0A0B4UL66	Endo-polygalacturonase OS=Aspergillus niger OX=5061 PE=2 SV=1	0	10.643	5.40541	2	4	2	1	370	38.7	4.18	8.12	2
FALSE	High	Master Protein	A0A100II27	Uncharacterized protein OS=Aspergillus niger OX=5061 GN=ABL_04309 PE=4 SV=1	0	10.616	13.7143	2	4	2	1	175	18.8	5.52	10.94	2
FALSE	High	Master Protein	A0A100IS87	UDP-N-acetylglucosamine pyrophosphorylase OS=Aspergillus niger OX=5061 GN=ABL_09055 PE=4 SV=1	0	10.59	10.4536	5	6	5	1	507	55.9	6.16	13.07	5
FALSE	High	Master Protein	A0A1L9NPG4	Uncharacterized protein OS=Aspergillus tubingensis CBS 134.48 OX=767770 GN=ASPTUDRAFT_52811 PE=4 SV=1	0	10.58	10.9023	2	3	2	1	266	27.5	5.26	8.69	2
FALSE	High	Master Protein	A2QXI7	Aspergillus niger contig An11c0300, genomic contig OS=Aspergillus niger (strain CBS 513.88 / FGSC A1513) OX=425011 GN=An11g09120 PE=4 SV=1	0	10.555	23.8806	3	6	3	1	134	15	11.14	15.68	3
FALSE	High	Master Protein	A0A100IKY5	Oxidoreductase, short chain dehydrogenase/reductase family protein OS=Aspergillus niger OX=5061 GN=ABL_05790 PE=4 SV=1	0	10.542	18.4314	3	3	3	1	255	26.8	6.64	7.26	3
FALSE	High	Master Protein	A0A254U1V7	3-hydroxyacyl-CoA dehydrogenase NAD binding domain family protein OS=Aspergillus niger OX=5061 GN=CAN33_18995 PE=4 SV=1	0	10.526	11.7284	3	4	3	1	324	34.4	8.65	10.27	3
FALSE	High	Master Protein	A0A100IEA6	Glycosyl hydrolase OS=Aspergillus niger OX=5061 GN=ABL_02927 PE=4 SV=1	0	10.506	5.97738	3	5	3	1	619	68.5	5.01	14.22	3
FALSE	High	Master Protein	A0A023UH08	Endo-beta-1, 4-glucanase OS=Aspergillus niger OX=5061 GN=eg1 PE=2 SV=1	0	10.499	12.9518	3	4	1	1	332	36.8	4.59	11.1	3
FALSE	High	Master Protein	A0A1L9NLP6	Uncharacterized protein OS=Aspergillus tubingensis CBS 134.48 OX=767770 GN=ASPTUDRAFT_52027 PE=4 SV=1	0	10.481	6.7086	3	3	3	1	477	53.7	5.1	7.41	3
FALSE	High	Master Protein	A0A146FWH8	Tubulin beta chain OS=Aspergillus luchuensis OX=1069201 GN=RIB2604_02902750 PE=3 SV=1	0	10.459	7.09534	3	4	3	1	451	50.3	5.26	9.56	3
FALSE	High	Master Protein	A0A100I669	Rab GDP dissociation inhibitor OS=Aspergillus niger OX=5061 GN=ABL_00928 PE=3 SV=1	0	10.379	6.35838	4	6	4	1	692	77.9	7.03	14.15	4
FALSE	High	Master Protein	G3XNA5	Uncharacterized protein OS=Aspergillus niger (strain ATCC 1015 / CBS 113.46 / FGSC A1144 / LSHB Ac4 / NCTC 3858a / NRRL 328 / USDA 3528.7) OX=380704 GN=ASPNIDRAFT_210876 PE=4 SV=1	0	10.361	28.1818	2	2	2	1	110	11.2	7.81	6.33	2
FALSE	High	Master Protein	A0A1L9MU41	Uncharacterized protein OS=Aspergillus tubingensis CBS 134.48 OX=767770 GN=ASPTUDRAFT_59269 PE=4 SV=1	0	10.356	8.07692	2	3	2	1	260	28.9	6.05	8.04	2
FALSE	High	Master Protein	A0A1L9N741	Beta-galactosidase OS=Aspergillus tubingensis CBS 134.48 OX=767770 GN=ASPTUDRAFT_28744 PE=3 SV=1	0	10.317	3.34975	3	4	3	1	1015	110.6	5.21	11.81	3
FALSE	High	Master Protein	A0A1L9N2M4	Uncharacterized protein OS=Aspergillus tubingensis CBS 134.48 OX=767770 GN=ASPTUDRAFT_55580 PE=4 SV=1	0	10.285	8.33333	4	4	4	1	588	65.3	6.89	9.6	4
FALSE	High	Master Protein	A0A117E1Y9	ATP-dependent RNA helicase chl1 OS=Aspergillus niger OX=5061 GN=ABL_07444 PE=3 SV=1	0	10.245	2.17391	2	4	2	1	1058	119.4	8.9	7.51	2
FALSE	High	Master Protein	A0A1L9N9A7	Uncharacterized protein OS=Aspergillus tubingensis CBS 134.48 OX=767770 GN=ASPTUDRAFT_189799 PE=4 SV=1	0	10.205	18.0791	3	6	3	1	177	19.4	5.05	13.77	3
FALSE	High	Master Protein	A0A1L9NMZ2	Uncharacterized protein OS=Aspergillus tubingensis CBS 134.48 OX=767770 GN=ASPTUDRAFT_52434 PE=3 SV=1	0	10.172	14.6341	5	5	5	1	451	48.9	4.65	10.33	5
FALSE	High	Master Protein	G7XWQ6	Nitroreductase family protein OS=Aspergillus kawachii (strain NBRC 4308) OX=1033177 GN=AKAW_09479 PE=4 SV=1	0	10.171	14.2857	3	4	3	1	217	24.1	5.29	6.65	3
FALSE	High	Master Protein	A0A124BVY9	Aldehyde reductase 1 OS=Aspergillus niger OX=5061 GN=ABL_02212 PE=4 SV=1	0	10.165	10.2719	3	3	3	1	331	37.8	5.85	8.77	3
FALSE	High	Master Protein	E0WH82	Ribulose bisphosphate carboxylase large chain (Fragment) OS=Cosmarium laeve OX=328285 GN=rbcL PE=3 SV=1	0	10.149	7.3991	3	4	3	1	446	49.3	6.6	10.72	3
FALSE	High	Master Protein	A0A146FP77	Glutamyl-tRNA synthetase OS=Aspergillus luchuensis OX=1069201 GN=RIB2604_02301000 PE=3 SV=1	0	10.116	4.63483	3	3	3	1	712	80.5	6.92	8.02	3
FALSE	High	Master Protein	A0A146FXS3	ATP synthase subunit d, mitochondrial OS=Aspergillus luchuensis OX=1069201 GN=RIB2604_03001550 PE=4 SV=1	0	10.098	22.1154	4	4	4	1	208	23.1	9.1	8.2	4
FALSE	High	Master Protein	A0A124BXN7	Steroid monooxygenase OS=Aspergillus niger OX=5061 GN=ABL_05624 PE=4 SV=1	0	10.061	2.37929	3	3	3	1	1429	157.2	5.26	8.59	3
FALSE	High	Master Protein	A0A1L9SRF8	S-adenosylmethionine synthase OS=Penicilliopsis zonata CBS 506.65 OX=1073090 GN=ASPZODRAFT_128203 PE=3 SV=1	0	10.041	7.84884	2	3	1	1	344	38	7.25	9.07	2
FALSE	High	Master Protein	A0A117E187	Alpha-xylosidase OS=Aspergillus niger OX=5061 GN=ABL_06329 PE=3 SV=1	0	10.013	4.4837	3	4	3	1	736	82.4	5.55	8.48	3
FALSE	High	Master Protein	A0A1F7ZKJ7	Acetyl-CoA acetyltransferase IA (Fragment) OS=Aspergillus bombycis OX=109264 GN=ABOM_011259 PE=3 SV=1	0	10.011	7.2093	2	2	2	1	430	44.2	6.87	6.14	2
FALSE	High	Master Protein	A0A1L9N7P7	Uncharacterized protein OS=Aspergillus tubingensis CBS 134.48 OX=767770 GN=ASPTUDRAFT_118036 PE=3 SV=1	0	9.957	7.02247	2	3	2	1	356	39.3	6.54	6.58	2
FALSE	High	Master Protein	A0A100IND6	HAD superfamily hydrolase OS=Aspergillus niger OX=5061 GN=ABL_06801 PE=4 SV=1	0	9.949	15.9836	3	3	3	1	244	27.1	5.15	8.92	3
FALSE	High	Master Protein	A0A117DW12	Catechol dioxygenase OS=Aspergillus niger OX=5061 GN=ABL_01312 PE=4 SV=1	0	9.941	10.7937	3	6	3	1	315	35.4	5.76	15.51	3
FALSE	High	Master Protein	A0A1L9UTA8	Uncharacterized protein OS=Aspergillus brasiliensis CBS 101740 OX=767769 GN=ASPBRDRAFT_40114 PE=4 SV=1	0	9.931	12.3223	2	2	2	1	211	23.6	5.5	6.42	2
FALSE	High	Master Protein	A0A146FSJ4	Tripeptidyl peptidase A OS=Aspergillus luchuensis OX=1069201 GN=RIB2604_02600670 PE=4 SV=1	0	9.824	6.21762	3	3	3	1	579	61.9	4.5	7.93	3
FALSE	High	Master Protein	A0A1L9UA72	Uncharacterized protein OS=Aspergillus brasiliensis CBS 101740 OX=767769 GN=ASPBRDRAFT_33164 PE=4 SV=1	0	9.823	3.98724	2	3	2	1	627	67.6	4.34	8.91	2
FALSE	High	Master Protein	A0A146FQT6	Eukaryotic translation initiation factor 3 subunit A OS=Aspergillus luchuensis OX=1069201 GN=TIF32 PE=3 SV=1	0	9.811	3.6019	3	3	3	1	1055	120.5	9.41	9.25	3
FALSE	High	Master Protein	A0A0L1IKM1	Aminopeptidase OS=Aspergillus nomius NRRL 13137 OX=1509407 GN=ANOM_011122 PE=4 SV=1	0	9.77	3.39303	3	5	2	1	1061	118.7	5.57	12.01	3
FALSE	High	Master Protein	G3XP44	Uncharacterized protein OS=Aspergillus niger (strain ATCC 1015 / CBS 113.46 / FGSC A1144 / LSHB Ac4 / NCTC 3858a / NRRL 328 / USDA 3528.7) OX=380704 GN=ASPNIDRAFT_41640 PE=4 SV=1	0	9.768	8.2397	2	3	2	1	267	27.3	4.98	5.7	2
FALSE	High	Master Protein	A0A117E3S3	Vacuolar ATP synthase subunit E OS=Aspergillus niger OX=5061 GN=ABL_08298 PE=3 SV=1	0	9.759	14.2857	3	4	3	1	231	26	5.27	8.11	3
FALSE	High	Master Protein	A0A2I2GB70	GTP-binding nuclear protein OS=Aspergillus steynii IBT 23096 OX=1392250 GN=P170DRAFT_380516 PE=3 SV=1	0	9.75	19.9074	5	6	5	1	216	24.2	6.92	16.93	5
FALSE	High	Master Protein	A0A117E273	Uncharacterized protein OS=Aspergillus niger OX=5061 GN=ABL_05867 PE=4 SV=1	0	9.723	4.26136	2	2	2	1	704	71.7	5.05	4.6	2
FALSE	High	Master Protein	Q4WHU8	40S ribosomal protein S11 OS=Neosartorya fumigata (strain ATCC MYA-4609 / Af293 / CBS 101355 / FGSC A1100) OX=330879 GN=AFUA_2G04130 PE=3 SV=1	0	9.723	17.0455	4	5	4	1	176	20.4	10.81	13.09	4
FALSE	High	Master Protein	A0A2K4ZY90	Uncharacterized protein OS=Aspergillus niger OX=5061 GN=ATCC64974_23430 PE=3 SV=1	0	9.698	2.35043	4	4	4	1	1872	205.3	6.23	7.47	4
FALSE	High	Master Protein	A0A124BX67	Hsc70 cochaperone OS=Aspergillus niger OX=5061 GN=ABL_04175 PE=4 SV=1	0	9.665	13.7427	3	4	3	1	342	35.4	5.06	8.55	3
FALSE	High	Master Protein	A0A117DXS9	Class V chitinase OS=Aspergillus niger OX=5061 GN=ABL_01657 PE=3 SV=1	0	9.663	7.15884	3	5	3	1	447	49	5.36	11.44	3
FALSE	High	Master Protein	A0A146FP49	Methylmalonate-semialdehyde dehydrogenase OS=Aspergillus luchuensis OX=1069201 GN=RIB2604_02106950 PE=4 SV=1	0	9.646	6.5	3	3	3	1	600	63.8	7.9	8.68	3
FALSE	High	Master Protein	Q1JTV6	Acetyl-CoA carboxylase OS=Aspergillus niger OX=5061 GN=accA PE=4 SV=1	0	9.644	2.30937	4	4	4	1	2295	255.7	6.3	6.78	4
FALSE	High	Master Protein	A0A100I8N1	1,3-beta-glucanosyltransferase OS=Aspergillus niger OX=5061 GN=ABL_01828 PE=3 SV=1	0	9.642	4.53686	2	5	2	1	529	56.8	4.78	15.45	2
FALSE	High	Master Protein	A0A117E4K6	Short chain dehydrogenase/reductase family OS=Aspergillus niger OX=5061 GN=ABL_09513 PE=3 SV=1	0	9.607	4.08163	1	3	1	1	294	31.5	5.9	7.79	1
FALSE	High	Master Protein	A0A117DXA8	Glucose-6-phosphate 1-epimerase OS=Aspergillus niger OX=5061 GN=ABL_02292 PE=3 SV=1	0	9.603	9.6875	3	5	3	1	320	35.1	5.15	12.44	3
FALSE	High	Master Protein	A0A0U5GB69	Putative 60S ribosomal protein L43 OS=Aspergillus calidoustus OX=454130 GN=ASPCAL11948 PE=3 SV=1	0	9.546	28.2609	2	2	2	1	92	10.1	10.45	5.65	2
FALSE	High	Master Protein	A0A117DZU9	Elongation factor 1-beta OS=Aspergillus niger OX=5061 GN=ABL_04301 PE=3 SV=1	0	9.485	4.84848	2	2	2	1	330	36.3	4.81	6.51	2
FALSE	High	Master Protein	A0A1L9UBK0	Uncharacterized protein OS=Aspergillus brasiliensis CBS 101740 OX=767769 GN=ASPBRDRAFT_46365 PE=4 SV=1	0	9.475	5.55556	3	4	3	1	558	61.9	8.09	10.56	3
FALSE	High	Master Protein	A0A100IFS8	Sorbitol/xylulose reductase OS=Aspergillus niger OX=5061 GN=ABL_03636 PE=4 SV=1	0	9.446	9.02256	2	3	2	1	266	28.4	6.13	8.64	2
FALSE	High	Master Protein	G7XFA2	Monooxygenase OS=Aspergillus kawachii (strain NBRC 4308) OX=1033177 GN=AKAW_03363 PE=4 SV=1	0	9.421	10.1351	3	4	3	1	444	48.5	6.61	6.01	3
FALSE	High	Master Protein	A0A1M3T7Y6	Glycoside hydrolase family 17 protein OS=Aspergillus luchuensis CBS 106.47 OX=1137211 GN=ASPFODRAFT_221803 PE=3 SV=1	0	9.4	7.28477	3	5	3	1	453	45.9	4.51	15.03	3
FALSE	High	Master Protein	A0A1M3T246	Lactoylglutathione lyase OS=Aspergillus luchuensis CBS 106.47 OX=1137211 GN=ASPFODRAFT_52486 PE=3 SV=1	0	9.392	9.74212	3	4	3	1	349	40	6.86	9.07	3
FALSE	High	Master Protein	A0A100IUG6	Catalase OS=Aspergillus niger OX=5061 GN=ABL_10073 PE=4 SV=1	0	9.307	6.49573	3	3	3	1	585	66	7.65	8.95	3
FALSE	High	Master Protein	A0A254UAR6	Eukaryotic translation initiation factor 3 subunit M OS=Aspergillus niger OX=5061 GN=CAN33_10595 PE=3 SV=1	0	9.284	5.41401	3	3	3	1	628	66.8	4.88	7.13	3
FALSE	High	Master Protein	A0A100IMH6	Pectin lyase D OS=Aspergillus niger OX=5061 GN=ABL_06612 PE=3 SV=1	0	9.27	6.43432	2	5	2	1	373	39	4.49	13.59	2
FALSE	High	Master Protein	A0A100ITM3	FAD/FMN-containing isoamyl alcohol oxidase MreA OS=Aspergillus niger OX=5061 GN=ABL_09770 PE=3 SV=1	0	9.238	6.89046	3	3	3	1	566	61.4	5.57	7.11	3
FALSE	High	Master Protein	A0A100IJ01	Homogentisate 1,2-dioxygenase OS=Aspergillus niger OX=5061 GN=ABL_04775 PE=4 SV=1	0	9.231	7.64192	3	3	3	1	458	51.3	6.2	8.52	3
FALSE	High	Master Protein	A0A2K5ACY3	Uncharacterized protein OS=Aspergillus niger OX=5061 GN=ATCC64974_74490 PE=4 SV=1	0	9.201	2.26415	2	3	2	1	1060	119.4	6.28	8.55	2
FALSE	High	Master Protein	A0A100I5R0	Uncharacterized protein OS=Aspergillus niger OX=5061 GN=ABL_01096 PE=4 SV=1	0	9.182	2.63505	1	1	1	1	759	74.2	4.35	5.67	1
FALSE	High	Master Protein	A0A146F7G7	Quinone oxidoreductase OS=Aspergillus luchuensis OX=1069201 GN=RIB2604_01004520 PE=4 SV=1	0	9.171	7.50552	3	3	3	1	453	49.7	7.14	7.24	3
FALSE	High	Master Protein	A0A100ISK7	Threonine synthase OS=Aspergillus niger OX=5061 GN=ABL_09210 PE=4 SV=1	0	9.11	6.36704	3	3	3	1	534	59	5.68	7.1	3
FALSE	High	Master Protein	A0A100IEJ2	Metallopeptidase MepB OS=Aspergillus niger OX=5061 GN=ABL_03327 PE=3 SV=1	0	9.107	3.17965	4	4	4	1	1258	142.6	7.24	9.31	4
FALSE	High	Master Protein	A0A146EXH9	ATP dependent RNA helicase OS=Aspergillus luchuensis OX=1069201 GN=RIB2604_00102520 PE=4 SV=1	0	9.107	9.45674	4	4	4	1	497	55.9	6.34	9.67	4
FALSE	High	Master Protein	A0A100IAH9	Calcium homeostasis protein Regucalcin OS=Aspergillus niger OX=5061 GN=ABL_02272 PE=4 SV=1	0	9.071	9.25	4	4	4	1	400	44.4	5.35	9.02	4
FALSE	High	Master Protein	A0A100I8W6	1,4-beta-D-glucan cellobiohydrolase B OS=Aspergillus niger OX=5061 GN=ABL_01546 PE=4 SV=1	0	9.067	2.2929	3	4	2	1	1352	144.9	4.72	9	3
FALSE	High	Master Protein	Q0CE96	O-acetylhomoserine OS=Aspergillus terreus (strain NIH 2624 / FGSC A1156) OX=341663 GN=ATEG_07988 PE=3 SV=1	0	9.055	7.48299	3	3	3	1	441	48	9.69	5.28	3
FALSE	High	Master Protein	A0A0L1J251	Proteasome endopeptidase complex OS=Aspergillus nomius NRRL 13137 OX=1509407 GN=ANOM_005170 PE=3 SV=1	0	9.007	8.07453	2	2	2	1	322	35.7	7.75	6.56	2
FALSE	High	Master Protein	A0A146FSH5	Similar to An08g04540 OS=Aspergillus luchuensis OX=1069201 GN=RIB2604_02600570 PE=4 SV=1	0	9.004	8.20669	2	3	2	1	329	37	5.25	7.98	2
FALSE	High	Master Protein	A0A124BXM8	Tripeptidyl-peptidase OS=Aspergillus niger OX=5061 GN=ABL_05568 PE=4 SV=1	0	8.992	4.0783	2	2	2	1	613	65.9	5.59	5.99	2
FALSE	High	Master Protein	A0A0J5PI13	Acetylglutamate kinase OS=Aspergillus fumigatus Z5 OX=1437362 GN=Y699_07410 PE=3 SV=1	0	8.935	1.22699	2	3	2	1	1956	216.5	6.83	7.98	2
FALSE	High	Master Protein	A2QK49	Aspergillus niger contig An04c0330, genomic contig OS=Aspergillus niger (strain CBS 513.88 / FGSC A1513) OX=425011 GN=An04g09360 PE=4 SV=1	0	8.922	9.35252	2	3	2	1	278	30.1	4.81	7.53	2
FALSE	High	Master Protein	A0A146FHT1	Peptidylprolyl isomerase OS=Aspergillus luchuensis OX=1069201 GN=RIB2604_01902830 PE=4 SV=1	0	8.919	33.3333	3	4	3	1	114	12.2	6.02	9.82	3
FALSE	High	Master Protein	A0A2G7FS33	Histone H2B OS=Aspergillus arachidicola OX=656916 GN=AARAC_009149 PE=3 SV=1	0	8.91	3.73711	3	4	3	1	776	85.3	8.68	9.5	3
FALSE	High	Master Protein	A0A1L9MRG9	Uncharacterized protein OS=Aspergillus tubingensis CBS 134.48 OX=767770 GN=ASPTUDRAFT_156027 PE=4 SV=1	0	8.902	16.5049	2	2	2	1	206	21	5.45	6.71	2
FALSE	High	Master Protein	A0A100IPJ6	Dipeptidyl-peptidase V OS=Aspergillus niger OX=5061 GN=ABL_07633 PE=4 SV=1	0	8.898	3.44353	2	3	2	1	726	79.2	4.42	7.73	2
FALSE	High	Master Protein	G7XH32	Isovaleryl-CoA dehydrogenase IvdA OS=Aspergillus kawachii (strain NBRC 4308) OX=1033177 GN=AKAW_04355 PE=3 SV=1	0	8.888	8.13187	3	3	3	1	455	49.7	7.93	7.36	3
FALSE	High	Master Protein	A0A1M3TLT4	Uncharacterized protein OS=Aspergillus luchuensis CBS 106.47 OX=1137211 GN=ASPFODRAFT_32278 PE=4 SV=1	0	8.87	21.5054	3	4	3	1	186	20.8	4.78	6.65	3
FALSE	High	Master Protein	A0A1L9NIG3	Arginine biosynthesis bifunctional protein ArgJ, mitochondrial OS=Aspergillus tubingensis CBS 134.48 OX=767770 GN=ASPTUDRAFT_49943 PE=3 SV=1	0	8.835	7.69231	3	3	3	1	468	49.1	6.33	7.18	3
FALSE	High	Master Protein	A0A254UAQ7	Cation efflux family protein OS=Aspergillus niger OX=5061 GN=CAN33_1225 PE=4 SV=1	0	8.798	3.27684	2	2	2	1	885	96.5	6.01	5.26	2
FALSE	High	Master Protein	A0A146FEN8	Vacuolar carboxypeptidase Cps1 OS=Aspergillus luchuensis OX=1069201 GN=RIB2604_01712020 PE=4 SV=1	0	8.775	7.08117	4	4	4	1	579	63.7	4.89	10.86	4
FALSE	High	Master Protein	A0A1M3TYJ1	Uncharacterized protein OS=Aspergillus luchuensis CBS 106.47 OX=1137211 GN=ASPFODRAFT_66230 PE=3 SV=1	0	8.772	6.58915	4	4	4	1	516	57.7	6.11	10.66	4
FALSE	High	Master Protein	A0A146FIK0	Peptide hydrolase OS=Aspergillus luchuensis OX=1069201 GN=RIB2604_01903040 PE=3 SV=1	0	8.771	6.13811	2	2	2	1	391	43.4	5.53	3.37	2
FALSE	High	Master Protein	A0A1L9N677	Uncharacterized protein OS=Aspergillus tubingensis CBS 134.48 OX=767770 GN=ASPTUDRAFT_40872 PE=3 SV=1	0	8.75	4.90798	4	4	4	1	815	92	6.95	10.31	4
FALSE	High	Master Protein	A0A1S9DRG7	NADH-quinone oxidoreductase, chain G OS=Aspergillus oryzae OX=5062 GN=OAory_01081450 PE=4 SV=1	0	8.726	4.08432	3	3	3	1	759	83.4	6.7	7.55	3
FALSE	High	Master Protein	A0A254U087	AAR2 protein family protein OS=Aspergillus niger OX=5061 GN=CAN33_53525 PE=3 SV=1	0	8.695	6.93878	3	4	3	1	490	54.3	6.23	9.66	3
FALSE	High	Master Protein	G3Y4N1	1-(5-phosphoribosyl)-5-[(5-phosphoribosylamino)methylideneamino] imidazole-4-carboxamide isomerase OS=Aspergillus niger (strain ATCC 1015 / CBS 113.46 / FGSC A1144 / LSHB Ac4 / NCTC 3858a / NRRL 328 / USDA 3528.7) OX=380704 GN=ASPNIDRAFT_51056 PE=3 SV=1	0	8.68	8.91473	2	3	2	1	258	28.3	5.66	7.19	2
FALSE	High	Master Protein	A0A100IIJ3	Spermidine synthase OS=Aspergillus niger OX=5061 GN=ABL_04515 PE=3 SV=1	0	8.68	12.2642	3	3	3	1	318	36.2	5.78	9.79	3
FALSE	High	Master Protein	A0A100ITZ9	Alpha-L-arabinofuranosidase A OS=Aspergillus niger OX=5061 GN=ABL_09965 PE=4 SV=1	0	8.68	2.38854	1	3	1	1	628	67.9	4.28	11.29	1
FALSE	High	Master Protein	A0A146FCM0	Succinate dehydrogenase [ubiquinone] flavoprotein subunit, mitochondrial OS=Aspergillus luchuensis OX=1069201 GN=RIB2604_01710970 PE=3 SV=1	0	8.675	3.67107	2	3	2	1	681	75.2	6.55	8.31	2
FALSE	High	Master Protein	A0A1M3U1I5	Uncharacterized protein OS=Aspergillus luchuensis CBS 106.47 OX=1137211 GN=ASPFODRAFT_56338 PE=4 SV=1	0	8.671	9.49721	1	3	1	1	179	19.8	4.96	11.29	1
FALSE	High	Master Protein	A0A100IRC9	Uncharacterized protein OS=Aspergillus niger OX=5061 GN=ABL_08585 PE=4 SV=1	0	8.668	12.2137	1	2	1	1	131	13	4.22	8.86	1
FALSE	High	Master Protein	A0A100I925	Uncharacterized protein LOC100192528 OS=Aspergillus niger OX=5061 GN=ABL_01914 PE=4 SV=1	0	8.642	12.2807	4	4	4	1	342	38.2	5.68	9.22	4
FALSE	High	Master Protein	A0A146F605	Uncharacterized protein OS=Aspergillus luchuensis OX=1069201 GN=RIB2604_00901220 PE=4 SV=1	0	8.639	25.8065	2	2	2	1	93	10.7	6.92	3.04	2
FALSE	High	Master Protein	A0A254UAR3	Ribosomal S13/S15 N-terminal domain family protein OS=Aspergillus niger OX=5061 GN=CAN33_1150 PE=3 SV=1	0	8.612	8.44595	3	3	3	1	296	33.3	9.73	7.9	3
FALSE	High	Master Protein	A0A117E118	Mandelate racemase/muconate lactonizing enzyme family protein OS=Aspergillus niger OX=5061 GN=ABL_05989 PE=4 SV=1	0	8.588	7.9646	3	5	3	1	452	50.1	5.39	9.37	3
FALSE	High	Master Protein	A0A1L9UAX1	Inosine triphosphate pyrophosphatase OS=Aspergillus brasiliensis CBS 101740 OX=767769 GN=ASPBRDRAFT_46999 PE=3 SV=1	0	8.583	11.2903	2	3	2	1	186	20.5	6.35	6.6	2
FALSE	High	Master Protein	A0A1M3T551	Uncharacterized protein OS=Aspergillus luchuensis CBS 106.47 OX=1137211 GN=ASPFODRAFT_211336 PE=4 SV=1	0	8.579	7.61099	3	3	3	1	473	53.2	5.43	4.97	3
FALSE	High	Master Protein	A0A146F9L3	Dienelactone hydrolase family protein OS=Aspergillus luchuensis OX=1069201 GN=RIB2604_01602260 PE=4 SV=1	0	8.55	16.0643	4	4	4	1	249	27.4	6.42	11.15	4
FALSE	High	Master Protein	A0A100ISN4	Similar to An16g01890 OS=Aspergillus niger OX=5061 GN=ABL_09270 PE=4 SV=1	0	8.543	3.4375	2	3	2	1	640	70.4	5.59	9.08	2
FALSE	High	Master Protein	A0A146FIV0	Saccharopine dehydrogenase OS=Aspergillus luchuensis OX=1069201 GN=RIB2604_02004900 PE=4 SV=1	0	8.479	8.92857	4	4	4	1	448	49.1	5.82	8.5	4
FALSE	High	Master Protein	A0A1L9UIG1	Uncharacterized protein OS=Aspergillus brasiliensis CBS 101740 OX=767769 GN=ASPBRDRAFT_196966 PE=3 SV=1	0	8.432	14.791	4	4	4	1	311	34.3	6.34	8.31	4
FALSE	High	Master Protein	A0A1R3RWM9	Uncharacterized protein OS=Aspergillus carbonarius (strain ITEM 5010) OX=602072 GN=ASPCADRAFT_204602 PE=4 SV=1	0	8.413	1.79969	2	2	2	1	1278	140.2	5.15	6.11	2
FALSE	High	Master Protein	A0A0K8LG81	Proteasome subunit beta type-1 OS=Aspergillus udagawae OX=91492 GN=AUD_5574 PE=4 SV=1	0	8.376	2.84605	2	2	2	1	773	85	7.23	5.9	2
FALSE	High	Master Protein	A0A146F3V9	Uncharacterized protein OS=Aspergillus luchuensis OX=1069201 GN=RIB2604_00900040 PE=4 SV=1	0	8.37	9.79228	2	2	2	1	337	37.4	6.44	5.63	2
FALSE	High	Master Protein	A0A146FG11	Lipase OS=Aspergillus luchuensis OX=1069201 GN=RIB2604_01800760 PE=4 SV=1	0	8.336	4.30464	1	2	1	1	302	32	5.22	5.84	1
FALSE	High	Master Protein	A2QA64	Probable beta-galactosidase B OS=Aspergillus niger (strain CBS 513.88 / FGSC A1513) OX=425011 GN=lacB PE=3 SV=2	0	8.33	2.65487	2	2	2	1	1017	111.7	5	5.09	2
FALSE	High	Master Protein	A0A1M3TA65	Uncharacterized protein OS=Aspergillus luchuensis CBS 106.47 OX=1137211 GN=ASPFODRAFT_697896 PE=4 SV=1	0	8.33	13.125	4	4	4	1	320	35.2	6.7	9.31	4
FALSE	High	Master Protein	A0A100I4P6	Carboxypeptidase OS=Aspergillus niger OX=5061 GN=ABL_00808 PE=3 SV=1	0	8.25	5.38462	3	3	3	1	520	57.8	4.78	8.24	3
FALSE	High	Master Protein	G3XW67	Methylisocitrate lyase OS=Aspergillus niger (strain ATCC 1015 / CBS 113.46 / FGSC A1144 / LSHB Ac4 / NCTC 3858a / NRRL 328 / USDA 3528.7) OX=380704 GN=ASPNIDRAFT_42171 PE=4 SV=1	0	8.2	4.07166	2	2	2	1	614	67.6	6.81	5.54	2
FALSE	High	Master Protein	A0A124BY49	T-complex protein 1 subunit eta OS=Aspergillus niger OX=5061 GN=ABL_07112 PE=3 SV=1	0	8.19	2.66667	2	2	2	1	975	106.3	6.71	5.17	2
FALSE	High	Master Protein	A0A254TUL3	Diphosphomevalonate decarboxylase OS=Aspergillus niger OX=5061 GN=ATCC64974_77580 PE=3 SV=1	0	8.175	8.66337	3	3	3	1	404	43.4	6.19	7.84	3
FALSE	High	Master Protein	A0A0L1JGM7	Argininosuccinate synthase OS=Aspergillus nomius NRRL 13137 OX=1509407 GN=ANOM_001491 PE=3 SV=1	0	8.168	5.9952	2	3	2	1	417	46.8	5.67	6.5	2
FALSE	High	Master Protein	A0A0K8LDS5	40S ribosomal protein S24 OS=Aspergillus udagawae OX=91492 GN=AUD_4734 PE=3 SV=1	0	8.139	9.63303	2	3	2	1	218	24.2	10.35	8.15	2
FALSE	High	Master Protein	A0A100IAN6	Thioredoxin OS=Aspergillus niger OX=5061 GN=ABL_02313 PE=4 SV=1	0	8.136	7.83133	2	2	2	1	332	36.5	4.92	5.97	2
FALSE	High	Master Protein	A0A1L9UUL6	NAD-specific glutamate dehydrogenase OS=Aspergillus brasiliensis CBS 101740 OX=767769 GN=ASPBRDRAFT_51188 PE=3 SV=1	0	8.117	4.15537	4	5	4	1	1107	124.7	6.44	8.54	4
FALSE	High	Master Protein	A0A100IE53	Transcription factor OS=Aspergillus niger OX=5061 GN=ABL_03198 PE=4 SV=1	0	8.108	4.53001	4	4	4	1	883	98.4	6.18	4.41	4
FALSE	High	Master Protein	A0A0U4ZH87	Polyadenylate-binding protein OS=Aspergillus calidoustus OX=454130 GN=ASPCAL12172 PE=3 SV=1	0	8.084	6.01915	4	4	4	1	731	79.2	5.91	8.42	4
FALSE	High	Master Protein	A0A1M3TBG8	Uncharacterized protein OS=Aspergillus luchuensis CBS 106.47 OX=1137211 GN=ASPFODRAFT_49570 PE=4 SV=1	0	8.083	11.1554	2	3	2	1	251	26.9	6.77	8.89	2
FALSE	High	Master Protein	A0A1S9DD40	Ribosomal protein S9 OS=Aspergillus oryzae OX=5062 GN=OAory_01092240 PE=3 SV=1	0	8.072	2.84153	2	3	2	1	915	102.9	7.42	8.46	2
FALSE	High	Master Protein	A0A100I4B0	Uncharacterized protein OS=Aspergillus niger OX=5061 GN=ABL_00708 PE=4 SV=1	0	8.064	7.96813	4	5	3	1	502	54.5	9.31	13.98	4
FALSE	High	Master Protein	A0A100IRW4	Uncharacterized protein LOC100273618 OS=Aspergillus niger OX=5061 GN=ABL_08873 PE=3 SV=1	0	8.063	13.3705	4	4	4	1	359	38.6	5.68	7.4	4
FALSE	High	Master Protein	A0A117E1V8	NADH-ubiquinone oxidoreductase 21 kDa subunit OS=Aspergillus niger OX=5061 GN=ABL_07304 PE=4 SV=1	0	8.016	7.31707	2	4	2	1	287	31.9	9.69	4.14	2
FALSE	High	Master Protein	A0A146FFB7	Allergen OS=Aspergillus luchuensis OX=1069201 GN=RIB2604_01805200 PE=4 SV=1	0	8.011	18.6747	3	4	3	1	166	17.9	5.96	12.21	3
FALSE	High	Master Protein	A0A2K5A558	Uncharacterized protein OS=Aspergillus niger OX=5061 GN=ATCC64974_48020 PE=3 SV=1	0	7.977	2.89017	2	4	2	1	692	79.6	8.32	7.72	2
FALSE	High	Master Protein	A0A146F662	40S ribosomal protein S19 OS=Aspergillus luchuensis OX=1069201 GN=RIB2604_01004060 PE=4 SV=1	0	7.976	18.6047	4	4	4	1	215	24	8.78	6.47	4
FALSE	High	Master Protein	A0A1L9UL25	Uncharacterized protein OS=Aspergillus brasiliensis CBS 101740 OX=767769 GN=ASPBRDRAFT_42048 PE=4 SV=1	0	7.968	8.41683	4	4	4	1	499	54.4	5.24	9.62	4
FALSE	High	Master Protein	A0A0F8UL99	Uncharacterized protein (Fragment) OS=Aspergillus rambellii OX=308745 GN=ARAM_003098 PE=4 SV=1	0	7.967	3.37349	1	2	1	1	415	45.1	7.21	5.68	1
FALSE	High	Master Protein	A0A1L9N5Y7	Carboxylic ester hydrolase OS=Aspergillus tubingensis CBS 134.48 OX=767770 GN=ASPTUDRAFT_190898 PE=3 SV=1	0	7.963	5.27157	3	3	3	1	626	68.1	4.98	7.5	3
FALSE	High	Master Protein	A0A100I3F9	RNA polymerase I specific transcription initiation factor Rrn7 OS=Aspergillus niger OX=5061 GN=ABL_00146 PE=4 SV=1	0	7.949	3.82244	3	6	3	1	811	91.8	6.18	16.14	3
FALSE	High	Master Protein	A0A146FY87	Uncharacterized protein OS=Aspergillus luchuensis OX=1069201 GN=RIB2604_03200120 PE=4 SV=1	0	7.941	13.8462	3	3	3	1	260	30.1	8.53	7.67	3
FALSE	High	Master Protein	A0A254TW79	PHD-finger family protein OS=Aspergillus niger OX=5061 GN=CAN33_7290 PE=4 SV=1	0	7.915	2.8181	2	2	2	1	1171	126.7	6.87	5.09	2
FALSE	High	Master Protein	A0A254TWE9	Ribosomal protein L22 OS=Aspergillus niger OX=5061 GN=CAN33_37145 PE=3 SV=1	0	7.906	14.4404	4	5	4	1	277	30.6	10.45	10.03	4
FALSE	High	Master Protein	A2QG95	Aspergillus niger contig An03c0070, genomic contig OS=Aspergillus niger (strain CBS 513.88 / FGSC A1513) OX=425011 GN=An03g02370 PE=4 SV=1	0	7.905	7.277	3	3	3	1	426	48.4	5.5	7.77	3
FALSE	High	Master Protein	B8NDA6	4-aminobutyrate transaminase GatA OS=Aspergillus flavus (strain ATCC 200026 / FGSC A1120 / NRRL 3357 / JCM 12722 / SRRC 167) OX=332952 GN=AFLA_056670 PE=3 SV=1	0	7.883	6.18956	3	4	1	1	517	57.2	8.94	9.17	3
FALSE	High	Master Protein	A0A1M3TTT1	Glycoside hydrolase family 30 protein OS=Aspergillus luchuensis CBS 106.47 OX=1137211 GN=ASPFODRAFT_58763 PE=3 SV=1	0	7.864	9.61924	3	3	3	1	499	53.3	4.3	6.8	3
FALSE	High	Master Protein	G7XGV7	Transaldolase OS=Aspergillus kawachii (strain NBRC 4308) OX=1033177 GN=AKAW_04280 PE=4 SV=1	0	7.862	7.50751	2	2	2	1	333	36.4	6.27	6.45	2
FALSE	High	Master Protein	A0A1S9DR07	Thiolase OS=Aspergillus oryzae OX=5062 GN=OAory_01078840 PE=4 SV=1	0	7.846	3.41207	2	5	1	1	762	81.3	5.62	13.4	2
FALSE	High	Master Protein	A0A100ICN3	Pyruvate dehydrogenase E1 component subunit alpha OS=Aspergillus niger OX=5061 GN=ABL_02800 PE=4 SV=1	0	7.842	6.09952	4	4	4	1	623	69	8.78	10.23	4
FALSE	High	Master Protein	G7XHC8	Leukotriene A(4) hydrolase OS=Aspergillus kawachii (strain NBRC 4308) OX=1033177 GN=AKAW_04451 PE=3 SV=1	0	7.834	5.52239	3	4	3	1	670	75.9	5.96	5.87	3
FALSE	High	Master Protein	A0A100IHF7	Short-chain dehydrogenase/reductase family protein OS=Aspergillus niger OX=5061 GN=ABL_03883 PE=4 SV=1	0	7.828	10.3571	2	2	2	1	280	29.7	6.95	6.06	2
FALSE	High	Master Protein	A0A146FWN9	Carboxylic ester hydrolase OS=Aspergillus luchuensis OX=1069201 GN=RIB2604_03102720 PE=3 SV=1	0	7.826	5.69395	3	5	3	1	562	61.2	4.64	12.61	3
FALSE	High	Master Protein	A0A0F8WVV2	Uncharacterized protein OS=Aspergillus ochraceoroseus OX=138278 GN=AOCH_002383 PE=4 SV=1	0	7.802	1.01302	1	2	1	1	1382	149	9.52	5.65	1
FALSE	High	Master Protein	A0A100IAP3	Sterol carrier protein OS=Aspergillus niger OX=5061 GN=ABL_02053 PE=3 SV=1	0	7.791	8.0786	3	3	3	1	458	49	7.12	7.38	3
FALSE	High	Master Protein	A0A1L9U8A4	Uncharacterized protein OS=Aspergillus brasiliensis CBS 101740 OX=767769 GN=ASPBRDRAFT_134464 PE=4 SV=1	0	7.772	3.67647	1	3	1	1	408	43.6	5.03	9.08	1
FALSE	High	Master Protein	A0A0U5FX40	Putative Small GTPase AvaA OS=Aspergillus calidoustus OX=454130 GN=ASPCAL04443 PE=4 SV=1	0	7.763	18.932	3	4	2	1	206	23	5.02	6.89	3
FALSE	High	Master Protein	A0A100IQT8	Unnamed protein product OS=Aspergillus niger OX=5061 GN=ABL_08002 PE=4 SV=1	0	7.73	6.85484	3	3	3	1	496	55.4	5.49	5.98	3
FALSE	High	Master Protein	A0A124BYG4	DUF803 domain membrane protein OS=Aspergillus niger OX=5061 GN=ABL_08147 PE=4 SV=1	0	7.686	1.71592	3	3	3	1	2098	229.1	6.74	7.26	3
FALSE	High	Master Protein	A0A1M3T2D0	4-hydroxyphenylpyruvate dioxygenase OS=Aspergillus luchuensis CBS 106.47 OX=1137211 GN=ASPFODRAFT_52591 PE=3 SV=1	0	7.685	5.92593	2	2	2	1	405	45.8	5.8	4.93	2
FALSE	High	Master Protein	A0A1L9NPX2	Uncharacterized protein OS=Aspergillus tubingensis CBS 134.48 OX=767770 GN=ASPTUDRAFT_112470 PE=4 SV=1	0	7.658	9.83607	4	7	4	1	427	47	9.29	16.84	4
FALSE	High	Master Protein	A2QQ10	Eukaryotic translation initiation factor 3 subunit F OS=Aspergillus niger (strain CBS 513.88 / FGSC A1513) OX=425011 GN=An08g00880 PE=3 SV=1	0	7.658	8.26667	3	3	3	1	375	40.9	5.05	7.47	3
FALSE	High	Master Protein	G7X9B2	Uncharacterized protein OS=Aspergillus kawachii (strain NBRC 4308) OX=1033177 GN=AKAW_01645 PE=4 SV=1	0	7.65	14.4144	1	1	1	1	111	12.2	4.09	3.93	1
FALSE	High	Master Protein	A0A100IC39	Endo-xylogalacturonan hydrolase A OS=Aspergillus niger OX=5061 GN=ABL_02686 PE=3 SV=1	0	7.599	5.66502	2	2	2	1	406	42	4.54	6.54	2
FALSE	High	Master Protein	A0A1M3U060	Glycoside hydrolase family 78 protein OS=Aspergillus luchuensis CBS 106.47 OX=1137211 GN=ASPFODRAFT_202200 PE=4 SV=1	0	7.526	3.51145	2	3	2	1	655	70.2	5.35	5.93	2
FALSE	High	Master Protein	A0A146EY76	Uncharacterized protein OS=Aspergillus luchuensis OX=1069201 GN=RIB2604_00100650 PE=4 SV=1	0	7.525	14.4231	1	2	1	1	104	10.8	5.94	5.13	1
FALSE	High	Master Protein	A0A1L9RXM1	Uroporphyrinogen decarboxylase OS=Aspergillus wentii DTO 134E9 OX=1073089 GN=ASPWEDRAFT_169533 PE=3 SV=1	0	7.495	7.14286	3	4	3	1	364	40.8	6.87	7.94	3
FALSE	High	Master Protein	A0A254TWJ0	NAD dependent epimerase/dehydratase family protein OS=Aspergillus niger OX=5061 GN=CAN33_37575 PE=4 SV=1	0	7.495	6.00343	3	3	2	1	583	65.8	5.47	6.18	3
FALSE	High	Master Protein	A2QHP2	Aspergillus niger contig An04c0030, genomic contig OS=Aspergillus niger (strain CBS 513.88 / FGSC A1513) OX=425011 GN=An04g00560 PE=3 SV=1	0	7.491	18.9024	2	3	2	1	164	18.4	7.24	7.32	2
FALSE	High	Master Protein	A0A2K5AM88	Uncharacterized protein OS=Aspergillus niger OX=5061 GN=ATCC64974_107410 PE=4 SV=1	0	7.486	8.08081	1	1	1	1	198	20.5	6.35	4.17	1
FALSE	High	Master Protein	A0A124BYH9	Allergen Asp F3 OS=Aspergillus niger OX=5061 GN=ABL_08314 PE=4 SV=1	0	7.471	25.5952	4	5	4	1	168	18.5	5.38	12.41	4
FALSE	High	Master Protein	A0A1M3T7X1	Uncharacterized protein OS=Aspergillus luchuensis CBS 106.47 OX=1137211 GN=ASPFODRAFT_64007 PE=4 SV=1	0	7.444	14.4487	3	3	3	1	263	29.1	6.07	6.22	3
FALSE	High	Master Protein	A0A124BXT9	Dihydrodipicolinate synthetase family protein OS=Aspergillus niger OX=5061 GN=ABL_06122 PE=3 SV=1	0	7.441	4.80769	1	1	1	1	312	33	6.06	3.44	1
FALSE	High	Master Protein	A0A146G015	Short chain type dehydrogenase OS=Aspergillus luchuensis OX=1069201 GN=RIB2604_03800380 PE=4 SV=1	0	7.433	14.3911	3	3	3	1	271	28.7	6.68	6.1	3
FALSE	High	Master Protein	G7XP37	Oxidoreductase OS=Aspergillus kawachii (strain NBRC 4308) OX=1033177 GN=AKAW_06902 PE=3 SV=1	0	7.428	12.963	3	3	3	1	270	29.1	6.62	8.37	3
FALSE	High	Master Protein	G7XY80	Similar to An10g00810 OS=Aspergillus kawachii (strain NBRC 4308) OX=1033177 GN=AKAW_10003 PE=4 SV=1	0	7.407	22.4806	2	3	2	1	129	14.8	6.28	4.15	2
FALSE	High	Master Protein	A0A254UBB7	Aspartate--tRNA(Asn) ligase OS=Aspergillus niger OX=5061 GN=CAN33_2200 PE=3 SV=1	0	7.4	2.58418	3	3	3	1	1277	141.4	5.76	7.24	3
FALSE	High	Master Protein	A0A1L9MX74	Uncharacterized protein OS=Aspergillus tubingensis CBS 134.48 OX=767770 GN=ASPTUDRAFT_44889 PE=3 SV=1	0	7.359	9.9631	2	3	2	1	271	30.8	7.68	6.94	2
FALSE	High	Master Protein	A0A100IA86	MICOS complex subunit MIC60 OS=Aspergillus niger OX=5061 GN=ABL_02193 PE=3 SV=1	0	7.349	1.30881	3	3	2	1	2827	311.9	8.16	7.04	3
FALSE	High	Master Protein	G7Y086	Uncharacterized protein OS=Aspergillus kawachii (strain NBRC 4308) OX=1033177 GN=AKAW_10692 PE=4 SV=1	0	7.324	7.52688	1	2	1	1	186	20	4.92	4.18	1
FALSE	High	Master Protein	A2QMI1	Acetyltransferase component of pyruvate dehydrogenase complex OS=Aspergillus niger (strain CBS 513.88 / FGSC A1513) OX=425011 GN=An07g02180 PE=3 SV=1	0	7.28	4.59259	3	3	3	1	675	72.6	8.24	7.73	3
FALSE	High	Master Protein	A0A1M3T717	Uncharacterized protein OS=Aspergillus luchuensis CBS 106.47 OX=1137211 GN=ASPFODRAFT_63745 PE=4 SV=1	0	7.279	14.7887	2	3	2	1	142	16.3	5.54	7.03	2
FALSE	High	Master Protein	G7XQU2	RNA polymerase Rpb1 C-terminal repeat domain-containing protein OS=Aspergillus kawachii (strain NBRC 4308) OX=1033177 GN=AKAW_07480 PE=4 SV=1	0	7.272	3.51682	4	4	4	1	1308	145.6	4.73	4.65	4
FALSE	High	Master Protein	A0A100IMB1	Uracil-DNA glycosylase OS=Aspergillus niger OX=5061 GN=ABL_06507 PE=4 SV=1	0	7.214	8.25688	2	3	2	1	327	36	6.2	8.59	2
FALSE	High	Master Protein	A0A100I8V0	WD40 domain protein OS=Aspergillus niger OX=5061 GN=ABL_01619 PE=4 SV=1	0	7.199	3.15457	3	3	3	1	634	69.8	8.76	8.87	3
FALSE	High	Master Protein	A0A100I3T1	60S acidic ribosomal protein P0 OS=Aspergillus niger OX=5061 GN=ABL_00241 PE=3 SV=1	0	7.19	7.37179	2	5	2	1	312	33.4	4.92	9.97	2
FALSE	High	Master Protein	A0A146FIA4	Peptidyl-prolyl cis-trans isomerase OS=Aspergillus luchuensis OX=1069201 GN=RIB2604_02002020 PE=3 SV=1	0	7.181	11.9048	3	3	3	1	294	32.5	6.81	7.47	3
FALSE	High	Master Protein	A0A146FUW8	Alpha-n-arabinofuranosidase B OS=Aspergillus luchuensis OX=1069201 GN=RIB2604_03001060 PE=4 SV=1	0	7.178	4.40882	2	7	2	1	499	52.6	4.46	15.63	2
FALSE	High	Master Protein	A0A146FEM5	Alpha/beta hydrolase OS=Aspergillus luchuensis OX=1069201 GN=RIB2604_01800730 PE=4 SV=1	0	7.176	7.66667	2	2	2	1	300	32.9	5.35	5.38	2
FALSE	High	Master Protein	A0A1L9UUC2	Succinyl-CoA:3-ketoacid-coenzyme A transferase OS=Aspergillus brasiliensis CBS 101740 OX=767769 GN=ASPBRDRAFT_119640 PE=3 SV=1	0	7.138	7.53968	3	3	2	1	504	54.5	7.02	6.61	3
FALSE	High	Master Protein	G3YD57	S-methyl-5'-thioadenosine phosphorylase OS=Aspergillus niger (strain ATCC 1015 / CBS 113.46 / FGSC A1144 / LSHB Ac4 / NCTC 3858a / NRRL 328 / USDA 3528.7) OX=380704 GN=ASPNIDRAFT_178461 PE=3 SV=1	0	7.12	3.4565	2	2	2	1	839	92.5	6.25	6.09	2
FALSE	High	Master Protein	A0A100IB46	Acetyl-coenzyme A synthetase OS=Aspergillus niger OX=5061 GN=ABL_02424 PE=3 SV=1	0	7.087	6.1194	4	4	4	1	670	74.3	6.27	9.33	4
FALSE	High	Master Protein	A0A1U8QVL2	GR78_NEUCR 78 kDa GLUCOSE-REGULATED PROTEIN HOMOLOG (GRP 78) (IMMUNOGLOBULIN HEAVY CHAIN BINDING PROTEIN HOMOLOG) (BIP) OS=Emericella nidulans (strain FGSC A4 / ATCC 38163 / CBS 112.46 / NRRL 194 / M139) OX=227321 GN=AN2062.2 PE=3 SV=1	0	7.044	4.45104	3	12	2	1	674	73.7	4.97	26.29	3
FALSE	High	Master Protein	A0A100IE58	Uncharacterized protein OS=Aspergillus niger OX=5061 GN=ABL_03218 PE=4 SV=1	0	7.012	3.67299	3	3	3	1	844	93.3	8.32	3.82	3
FALSE	High	Master Protein	A0A100IT92	YkgB OS=Aspergillus niger OX=5061 GN=ABL_09565 PE=4 SV=1	0	7	6.28141	2	2	2	1	398	42.5	6.11	6.08	2
FALSE	High	Master Protein	A0A117E149	Eukaryotic translation initiation factor 3 subunit H OS=Aspergillus niger OX=5061 GN=ABL_04188 PE=3 SV=1	0	6.97	3.14208	2	2	2	1	732	81	8.51	4.86	2
FALSE	High	Master Protein	A0A1L9PL65	Uncharacterized protein OS=Aspergillus versicolor CBS 583.65 OX=1036611 GN=ASPVEDRAFT_664982 PE=4 SV=1	0	6.951	8.30565	2	2	2	1	301	33.4	6.95	4.44	2
FALSE	High	Master Protein	A0A1L9N7E5	Uncharacterized protein OS=Aspergillus tubingensis CBS 134.48 OX=767770 GN=ASPTUDRAFT_120061 PE=4 SV=1	0	6.949	2.7366	2	2	2	1	877	95.3	5.68	5.47	2
FALSE	High	Master Protein	A0A100IES2	Glutathione S-transferase OS=Aspergillus niger OX=5061 GN=ABL_03381 PE=4 SV=1	0	6.937	13.0252	3	3	3	1	238	26.3	6.89	4.59	3
FALSE	High	Master Protein	A0A146EZM3	Sorbitol dehydrogenase OS=Aspergillus luchuensis OX=1069201 GN=RIB2604_00301620 PE=3 SV=1	0	6.927	10.585	3	3	3	1	359	38.1	7.18	6.33	3
FALSE	High	Master Protein	A0A1M3TB78	Uncharacterized protein OS=Aspergillus luchuensis CBS 106.47 OX=1137211 GN=ASPFODRAFT_63097 PE=4 SV=1	0	6.926	3.36474	2	2	2	1	743	84.3	6.74	4.79	2
FALSE	High	Master Protein	A0A100IQN7	DUF1688 domain protein OS=Aspergillus niger OX=5061 GN=ABL_08250 PE=4 SV=1	0	6.903	7.02576	3	3	3	1	427	47.7	6.33	8.15	3
FALSE	High	Master Protein	Q4WGK7	Septin AspB OS=Neosartorya fumigata (strain ATCC MYA-4609 / Af293 / CBS 101355 / FGSC A1100) OX=330879 GN=AFUA_7G05370 PE=3 SV=1	0	6.898	4.74383	2	2	2	1	527	59.3	6.29	4.31	2
FALSE	High	Master Protein	A0A2V5HW89	Uncharacterized protein OS=Aspergillus indologenus CBS 114.80 OX=1450541 GN=BP00DRAFT_417796 PE=4 SV=1	0	6.86	1.99203	3	4	3	1	1506	168.6	9.13	9.8	3
FALSE	High	Master Protein	A0A100IPG1	60S ribosomal protein L10 OS=Aspergillus niger OX=5061 GN=ABL_07617 PE=4 SV=1	0	6.847	9.86547	2	3	1	1	223	25.5	10.24	5.35	2
FALSE	High	Master Protein	A0A146F6E9	Glucose-methanol-choline oxidoreductase OS=Aspergillus luchuensis OX=1069201 GN=RIB2604_01005190 PE=4 SV=1	0	6.837	6.29685	3	3	3	1	667	74.5	7.14	6.74	3
FALSE	High	Master Protein	A0A1M3T5M5	Uncharacterized protein OS=Aspergillus luchuensis CBS 106.47 OX=1137211 GN=ASPFODRAFT_64811 PE=4 SV=1	0	6.814	4.58599	3	3	3	1	785	84.7	6.44	5.26	3
FALSE	High	Master Protein	A0A1L9N3H7	Uncharacterized protein OS=Aspergillus tubingensis CBS 134.48 OX=767770 GN=ASPTUDRAFT_42711 PE=4 SV=1	0	6.813	17.3228	2	2	2	1	127	13.5	8.76	5.39	2
FALSE	High	Master Protein	A0A1S9DUY1	Cytochrome c1 OS=Aspergillus oryzae OX=5062 GN=OAory_01006380 PE=4 SV=1	0	6.802	3.10811	2	2	2	1	740	82.4	5.55	4.11	2
FALSE	High	Master Protein	A0A146FMZ8	Similar to An01g08080 OS=Aspergillus luchuensis OX=1069201 GN=RIB2604_02107210 PE=4 SV=1	0	6.773	3.80022	3	3	3	1	921	102.3	8.66	6.71	3
FALSE	High	Master Protein	A0A124BYX7	Versicolorin B synthase OS=Aspergillus niger OX=5061 GN=ABL_09618 PE=4 SV=1	0	6.762	3.41463	2	4	2	1	615	65.6	4.88	11.7	2
FALSE	High	Master Protein	G3XN08	UDP-glucose 4-epimerase OS=Aspergillus niger (strain ATCC 1015 / CBS 113.46 / FGSC A1144 / LSHB Ac4 / NCTC 3858a / NRRL 328 / USDA 3528.7) OX=380704 GN=ASPNIDRAFT_56583 PE=3 SV=1	0	6.755	12.7321	4	4	4	1	377	41.2	6.19	9.76	4
FALSE	High	Master Protein	A0A100IRD4	2,4-dihydroxyhept-2-ene-1,7-dioic acid aldolase OS=Aspergillus niger OX=5061 GN=ABL_08588 PE=4 SV=1	0	6.754	8.39695	2	4	2	1	262	28.1	5.96	7.82	2
FALSE	High	Master Protein	Q5BDV6	Uncharacterized protein OS=Emericella nidulans (strain FGSC A4 / ATCC 38163 / CBS 112.46 / NRRL 194 / M139) OX=227321 GN=AN1274.2 PE=4 SV=1	0	6.698	5.1532	3	4	1	1	718	78.7	8.43	7.3	3
FALSE	High	Master Protein	A0A1L9MYU7	Uncharacterized protein OS=Aspergillus tubingensis CBS 134.48 OX=767770 GN=ASPTUDRAFT_32018 PE=4 SV=1	0	6.662	11.8812	1	2	1	1	101	11.3	9.41	5.48	1
FALSE	High	Master Protein	A0A146EZL6	F5/8 type C domain protein OS=Aspergillus luchuensis OX=1069201 GN=RIB2604_00600350 PE=4 SV=1	0	6.645	7.6087	2	5	2	1	276	30.5	4.11	11.82	2
FALSE	High	Master Protein	A0A1L9N732	Uncharacterized protein OS=Aspergillus tubingensis CBS 134.48 OX=767770 GN=ASPTUDRAFT_926274 PE=4 SV=1	0	6.524	6.64062	2	2	1	1	512	57.8	5.27	5.34	2
FALSE	High	Master Protein	A0A2J5HLY3	HET-C protein OS=Aspergillus taichungensis OX=482145 GN=BDW42DRAFT_175390 PE=4 SV=1	0	6.478	7.57576	1	2	1	1	198	22	7.56	6.15	1
FALSE	High	Master Protein	G7XNL3	O-methyltransferase OS=Aspergillus kawachii (strain NBRC 4308) OX=1033177 GN=AKAW_06697 PE=4 SV=1	0	6.468	5.55556	2	2	2	1	414	46.3	6.6	5.34	2
FALSE	High	Master Protein	A0A124BXQ3	26S protease subunit rpt4 OS=Aspergillus niger OX=5061 GN=ABL_05759 PE=3 SV=1	0	6.463	6.42674	2	2	1	1	389	43.4	8.18	3.16	2
FALSE	High	Master Protein	A0A1M3T559	Carboxylic ester hydrolase OS=Aspergillus luchuensis CBS 106.47 OX=1137211 GN=ASPFODRAFT_211341 PE=3 SV=1	0	6.461	3.78007	2	3	1	1	582	64.1	4.78	6.26	2
FALSE	High	Master Protein	G7XQL0	NACHT domain protein OS=Aspergillus kawachii (strain NBRC 4308) OX=1033177 GN=AKAW_07164 PE=4 SV=1	0	6.457	1.52559	3	4	3	1	2032	229.7	6.47	6.31	3
FALSE	High	Master Protein	A0A1L9RWM1	Uncharacterized protein OS=Aspergillus wentii DTO 134E9 OX=1073089 GN=ASPWEDRAFT_57751 PE=3 SV=1	0	6.445	4.6748	2	2	1	1	492	54.7	6.38	5.54	2
FALSE	High	Master Protein	A0A146FBL9	Importin beta-1 subunit OS=Aspergillus luchuensis OX=1069201 GN=RIB2604_01702080 PE=4 SV=1	0	6.404	2.75229	2	3	2	1	872	96.4	4.78	6.39	2
FALSE	High	Master Protein	A0A2K5AKS5	Uncharacterized protein OS=Aspergillus niger OX=5061 GN=ATCC64974_102280 PE=4 SV=1	0	6.399	6.21891	2	2	2	1	402	41.1	4.56	5.52	2
FALSE	High	Master Protein	A0A2I1CM15	Orotidine 5'-phosphate decarboxylase OS=Aspergillus novofumigatus IBT 16806 OX=1392255 GN=P174DRAFT_399623 PE=3 SV=1	0	6.358	8.04196	2	3	2	1	286	31.1	6.65	5.7	2
FALSE	High	Master Protein	A0A146F7A4	Uncharacterized protein OS=Aspergillus luchuensis OX=1069201 GN=RIB2604_01502060 PE=4 SV=1	0	6.328	17.5182	2	2	2	1	137	15.5	6.33	5.74	2
FALSE	High	Master Protein	A0A1L9UD75	Uncharacterized protein OS=Aspergillus brasiliensis CBS 101740 OX=767769 GN=ASPBRDRAFT_182692 PE=3 SV=1	0	6.324	5.81162	2	2	2	1	499	51.4	4.55	3.4	2
FALSE	High	Master Protein	A0A117E4L6	Aspartic endopeptidase OS=Aspergillus niger OX=5061 GN=ABL_09962 PE=3 SV=1	0	6.31	6.80751	3	3	3	1	426	46.7	4.96	7.55	3
FALSE	High	Master Protein	A0A1M3T5T7	Aminopeptidase OS=Aspergillus luchuensis CBS 106.47 OX=1137211 GN=ASPFODRAFT_50928 PE=3 SV=1	0	6.285	2.16049	2	2	2	1	972	109.1	6.74	5.32	2
FALSE	High	Master Protein	A0A146FIC4	Alpha-galactosidase OS=Aspergillus luchuensis OX=1069201 GN=RIB2604_01901850 PE=3 SV=1	0	6.276	5.58214	3	3	3	1	627	67.7	4.86	6.83	3
FALSE	High	Master Protein	A0A100I6Z0	Putative glutathione-dependent formaldehyde-activating enzyme OS=Aspergillus niger OX=5061 GN=ABL_01149 PE=3 SV=1	0	6.264	12.5654	2	2	2	1	191	20.5	6.98	5.14	2
FALSE	High	Master Protein	A0A1M3TKJ9	Uncharacterized protein OS=Aspergillus luchuensis CBS 106.47 OX=1137211 GN=ASPFODRAFT_131665 PE=4 SV=1	0	6.238	19.8529	2	2	2	1	136	15.1	10.23	5.94	2
FALSE	High	Master Protein	A0A100IPW8	Peroxidase OS=Aspergillus niger OX=5061 GN=ABL_07813 PE=4 SV=1	0	6.231	4.49438	1	1	1	1	267	29.6	5.92	3.65	1
FALSE	High	Master Protein	A0A146FKD4	Zinc-containing alcohol dehydrogenase OS=Aspergillus luchuensis OX=1069201 GN=RIB2604_02002700 PE=4 SV=1	0	6.211	10.3746	3	3	3	1	347	37.4	6.73	5.26	3
FALSE	High	Master Protein	A0A100II62	Protein SEY1 OS=Aspergillus niger OX=5061 GN=SEY1 PE=3 SV=1	0	6.205	1.53694	3	3	1	1	2017	223.4	5.66	6.96	3
FALSE	High	Master Protein	A0A1L9UHY9	Pyrroline-5-carboxylate reductase OS=Aspergillus brasiliensis CBS 101740 OX=767769 GN=ASPBRDRAFT_196747 PE=3 SV=1	0	6.198	2.75862	2	2	2	1	870	93.9	6.19	5.46	2
FALSE	High	Master Protein	A0A1M3TVR5	Uncharacterized protein OS=Aspergillus luchuensis CBS 106.47 OX=1137211 GN=ASPFODRAFT_57040 PE=4 SV=1	0	6.194	8.33333	2	2	2	1	276	29.6	6.55	5.52	2
FALSE	High	Master Protein	A0A2I1D4K9	Nagb/rpia/CoA transferase-like protein OS=Aspergillus campestris IBT 28561 OX=1392248 GN=P168DRAFT_235324 PE=4 SV=1	0	6.19	1.52284	1	3	1	1	788	86.3	8.07	4.52	1
FALSE	High	Master Protein	A0A146EYZ2	RNA annealing protein Yra1 OS=Aspergillus luchuensis OX=1069201 GN=RIB2604_00402020 PE=4 SV=1	0	6.19	9.18367	2	2	2	1	294	30.9	9.99	5.15	2
FALSE	High	Master Protein	A0A1R3RB91	Uncharacterized protein OS=Aspergillus carbonarius (strain ITEM 5010) OX=602072 GN=ASPCADRAFT_9174 PE=4 SV=1	0	6.13	9.92366	1	2	1	1	131	13.8	4.41	6.37	1
FALSE	High	Master Protein	Q2U6G4	Uncharacterized protein OS=Aspergillus oryzae (strain ATCC 42149 / RIB 40) OX=510516 GN=AO090120000247 PE=4 SV=1	0	6.094	5.59611	2	2	2	1	411	45.8	6.18	6.48	2
FALSE	High	Master Protein	A0A1M3TFZ8	Uncharacterized protein OS=Aspergillus luchuensis CBS 106.47 OX=1137211 GN=ASPFODRAFT_207553 PE=3 SV=1	0	6.08	5.29801	2	2	2	1	604	67.2	6.89	4.44	2
FALSE	High	Master Protein	G3XN33	Glycogen branching enzyme OS=Aspergillus niger (strain ATCC 1015 / CBS 113.46 / FGSC A1144 / LSHB Ac4 / NCTC 3858a / NRRL 328 / USDA 3528.7) OX=380704 GN=ASPNIDRAFT_211162 PE=4 SV=1	0	6.076	3	2	2	2	1	700	80	5.99	5.24	2
FALSE	High	Master Protein	A0A100ICN8	Cyclin OS=Aspergillus niger OX=5061 GN=ABL_02795 PE=3 SV=1	0	6.051	4.91071	3	4	3	1	672	76.5	6.76	3.93	3
FALSE	High	Master Protein	A0A1L9UW25	Uncharacterized protein OS=Aspergillus brasiliensis CBS 101740 OX=767769 GN=ASPBRDRAFT_38094 PE=4 SV=1	0	6.049	12.037	3	4	3	1	324	36.2	6.34	6.45	3
FALSE	High	Master Protein	G3Y8Y3	Uncharacterized protein OS=Aspergillus niger (strain ATCC 1015 / CBS 113.46 / FGSC A1144 / LSHB Ac4 / NCTC 3858a / NRRL 328 / USDA 3528.7) OX=380704 GN=ASPNIDRAFT_57034 PE=4 SV=1	0	6.048	4.0367	2	2	2	1	545	60.8	7.72	5.84	2
FALSE	High	Master Protein	A0A100I8Y6	Fumarylacetoacetate hydrolase OS=Aspergillus niger OX=5061 GN=ABL_01893 PE=4 SV=1	0	6.032	7.17703	3	3	3	1	418	44.6	5.83	7.1	3
FALSE	High	Master Protein	A0A124BYH6	GDSL lipase/acylhydrolase family protein OS=Aspergillus niger OX=5061 GN=ABL_08177 PE=4 SV=1	0	6.029	6.19718	2	3	2	1	355	39.9	5.16	7.65	2
FALSE	High	Master Protein	A0A1L9NLC1	Uncharacterized protein OS=Aspergillus tubingensis CBS 134.48 OX=767770 GN=ASPTUDRAFT_113156 PE=4 SV=1	0	6.025	8.36653	2	4	2	1	251	29.1	7.05	8.26	2
FALSE	High	Master Protein	A0A100IGP4	Sarcosine oxidase OS=Aspergillus niger OX=5061 GN=ABL_03871 PE=4 SV=1	0	6.008	2.31481	1	2	1	1	432	48.3	5.85	4.89	1
FALSE	High	Master Protein	A0A1M3TRT2	Uncharacterized protein OS=Aspergillus luchuensis CBS 106.47 OX=1137211 GN=ASPFODRAFT_30449 PE=4 SV=1	0	6.008	18	2	2	2	1	150	15.2	9.82	5.9	2
FALSE	High	Master Protein	A0A146FMZ4	FAD binding domain containing protein OS=Aspergillus luchuensis OX=1069201 GN=RIB2604_02103910 PE=4 SV=1	0	5.999	2.10728	1	2	1	1	522	56.6	8.1	5.44	1
FALSE	High	Master Protein	A0A100IAT1	Carboxylic ester hydrolase OS=Aspergillus niger OX=5061 GN=ABL_02339 PE=3 SV=1	0	5.993	4.00697	2	3	1	1	574	62.7	4.58	6.24	2
FALSE	High	Master Protein	A0A1L9N1A6	Uncharacterized protein OS=Aspergillus tubingensis CBS 134.48 OX=767770 GN=ASPTUDRAFT_124442 PE=4 SV=1	0	5.99	4.91803	2	4	2	1	488	52.1	5.36	10.09	2
FALSE	High	Master Protein	A0A146F3Z8	Integral membrane protein OS=Aspergillus luchuensis OX=1069201 GN=RIB2604_00802820 PE=4 SV=1	0	5.98	2.04082	1	1	1	1	637	69.7	8.13	3.17	1
FALSE	High	Master Protein	A0A0F4IWR0	Peptidyl-prolyl cis-trans isomerase OS=Streptomyces katrae OX=68223 GN=VR44_33345 PE=3 SV=1	0	5.958	15.1515	2	3	1	1	165	17.8	6.18	6.59	2
FALSE	High	Master Protein	A0A1L9N9K0	Carboxylic ester hydrolase OS=Aspergillus tubingensis CBS 134.48 OX=767770 GN=ASPTUDRAFT_116643 PE=3 SV=1	0	5.935	3.77358	2	3	1	1	583	63.7	4.83	6.2	2
FALSE	High	Master Protein	A0A146FSM5	NADH-ubiquinone oxidoreductase OS=Aspergillus luchuensis OX=1069201 GN=RIB2604_02600970 PE=3 SV=1	0	5.908	16.3522	2	2	2	1	159	18.2	7.31	5.45	2
FALSE	High	Master Protein	A0A0L1J5Z6	Uncharacterized protein OS=Aspergillus nomius NRRL 13137 OX=1509407 GN=ANOM_005280 PE=3 SV=1	0	5.868	2.25352	2	2	2	1	1065	117.8	7.47	4.88	2
FALSE	High	Master Protein	A5ABN7	Aspergillus niger contig An11c0340, genomic contig OS=Aspergillus niger (strain CBS 513.88 / FGSC A1513) OX=425011 GN=An11g09880 PE=4 SV=1	0	5.85	9.78723	2	2	2	1	235	25.9	10.36	5.83	2
FALSE	High	Master Protein	A0A1L9N6T5	Uncharacterized protein OS=Aspergillus tubingensis CBS 134.48 OX=767770 GN=ASPTUDRAFT_168337 PE=4 SV=1	0	5.845	8.15217	3	3	3	1	368	38.9	7.03	6.43	3
FALSE	High	Master Protein	A0A1L9NIB8	Uncharacterized protein OS=Aspergillus tubingensis CBS 134.48 OX=767770 GN=ASPTUDRAFT_195663 PE=4 SV=1	0	5.835	10.628	2	3	2	1	207	23.2	4.81	6.41	2
FALSE	High	Master Protein	A0A1M3TNG2	Elongation factor Tu OS=Aspergillus luchuensis CBS 106.47 OX=1137211 GN=ASPFODRAFT_43973 PE=3 SV=1	0	5.811	7.04545	3	3	1	1	440	48.3	6.93	6.99	3
FALSE	High	Master Protein	A0A254U647	NAD(P)H:quinone oxidoreductase type IV OS=Aspergillus niger OX=5061 GN=CAN33_39965 PE=4 SV=1	0	5.809	5.81717	2	3	2	1	361	39.1	7.05	8.98	2
FALSE	High	Master Protein	A0A100ILU3	Carboxypeptidase OS=Aspergillus niger OX=5061 GN=ABL_06225 PE=3 SV=1	0	5.804	5.43478	2	2	2	1	552	61.2	4.67	4.51	2
FALSE	High	Master Protein	Q0CSG6	Uncharacterized protein OS=Aspergillus terreus (strain NIH 2624 / FGSC A1156) OX=341663 GN=ATEG_03368 PE=4 SV=1	0	5.791	10.4348	1	2	1	1	115	12.6	5.25	7.25	1
FALSE	High	Master Protein	A0A2I2F4D8	Cu,Zn superoxide dismutase-like protein OS=Aspergillus candidus OX=41067 GN=BDW47DRAFT_62212 PE=4 SV=1	0	5.788	5.47264	1	3	1	1	201	21.3	5.92	8.62	1
FALSE	High	Master Protein	A0A146EXX5	Similar to An12g07160 OS=Aspergillus luchuensis OX=1069201 GN=RIB2604_00103450 PE=4 SV=1	0	5.78	7.56881	3	3	3	1	436	48.3	9.16	6.66	3
FALSE	High	Master Protein	A0A1M3TZR2	Uncharacterized protein OS=Aspergillus luchuensis CBS 106.47 OX=1137211 GN=ASPFODRAFT_39440 PE=3 SV=1	0	5.778	5.47945	2	3	2	1	219	24.1	5.49	7.15	2
FALSE	High	Master Protein	A0A1L9MWE5	Uncharacterized protein OS=Aspergillus tubingensis CBS 134.48 OX=767770 GN=ASPTUDRAFT_818561 PE=4 SV=1	0	5.775	7.53296	3	3	3	1	531	57.6	8.24	6.04	3
FALSE	High	Master Protein	A0A1M3TP78	Uncharacterized protein OS=Aspergillus luchuensis CBS 106.47 OX=1137211 GN=ASPFODRAFT_79935 PE=4 SV=1	0	5.74	8.62745	2	2	2	1	255	27.6	5.64	5.19	2
FALSE	High	Master Protein	A0A146FU89	Heat shock protein Hsp88 OS=Aspergillus luchuensis OX=1069201 GN=RIB2604_02601210 PE=3 SV=1	0	5.738	5.61798	4	4	4	1	712	79.8	5.19	6.72	4
FALSE	High	Master Protein	A0A117E0D6	NADH-ubiquinone oxidoreductase 304 kDa subunit OS=Aspergillus niger OX=5061 GN=ABL_05089 PE=3 SV=1	0	5.738	4.52962	1	2	1	1	287	32.5	8.21	5.56	1
FALSE	High	Master Protein	A0A117E493	Nitrogen assimilation transcription factor NirA OS=Aspergillus niger OX=5061 GN=ABL_09377 PE=4 SV=1	0	5.736	2.24509	2	2	2	1	1069	118.9	7.21	5.26	2
FALSE	High	Master Protein	A0A017SGE7	Succinate dehydrogenase [ubiquinone] iron-sulfur subunit, mitochondrial OS=Aspergillus ruber CBS 135680 OX=1388766 GN=EURHEDRAFT_412000 PE=3 SV=1	0	5.73	7.35786	2	2	2	1	299	34	8.38	4.02	2
FALSE	High	Master Protein	A0A1R3RK11	Uncharacterized protein OS=Aspergillus carbonarius (strain ITEM 5010) OX=602072 GN=ASPCADRAFT_208482 PE=4 SV=1	0	5.719	7.91139	2	3	2	1	316	35.5	8.7	7	2
FALSE	High	Master Protein	A0A100ILS2	Serine hydroxymethyltransferase OS=Aspergillus niger OX=5061 GN=ABL_05812 PE=3 SV=1	0	5.692	5.9448	3	3	3	1	471	51.9	7.77	4.53	3
FALSE	High	Master Protein	A0A146FK32	Gluconate 5-dehydrogenase OS=Aspergillus luchuensis OX=1069201 GN=RIB2604_02008160 PE=3 SV=1	0	5.688	8.24742	2	2	2	1	291	31.8	7.85	4.79	2
FALSE	High	Master Protein	A0A0F8XBN8	60S ribosomal protein OS=Aspergillus rambellii OX=308745 GN=ARAM_006058 PE=3 SV=1	0	5.68	10.7527	2	2	2	1	186	21.6	11.18	7.07	2
FALSE	High	Master Protein	A0A117E2D6	NADPH-dependent diflavin oxidoreductase 1 OS=Aspergillus niger OX=5061 GN=TAH18 PE=3 SV=1	0	5.67	3.33681	3	3	3	1	959	106	6.81	4.44	3
FALSE	High	Master Protein	A0A1M3TT87	Histidine biosynthesis trifunctional protein OS=Aspergillus luchuensis CBS 106.47 OX=1137211 GN=ASPFODRAFT_30657 PE=3 SV=1	0	5.641	2.53456	2	3	2	1	868	92.5	5.71	4.01	2
FALSE	High	Master Protein	A0A1M3THP7	Carboxylic ester hydrolase OS=Aspergillus luchuensis CBS 106.47 OX=1137211 GN=ASPFODRAFT_134507 PE=3 SV=1	0	5.64	2.60223	1	1	1	1	538	59	5.68	3.4	1
FALSE	High	Master Protein	A2QVR8	Lysine--tRNA ligase OS=Aspergillus niger (strain CBS 513.88 / FGSC A1513) OX=425011 GN=An11g02400 PE=3 SV=1	0	5.633	5.01618	3	3	3	1	618	70.4	5.9	6.63	3
FALSE	High	Master Protein	A0A117E3J5	Ribosomal protein L19 OS=Aspergillus niger OX=5061 GN=ABL_09859 PE=3 SV=1	0	5.595	0.91247	3	4	3	1	2959	323.8	6.77	5.96	3
FALSE	High	Master Protein	A0A100ICX1	Allergen Asp f 4 OS=Aspergillus niger OX=5061 GN=ABL_02873 PE=4 SV=1	0	5.562	4.26829	1	1	1	1	328	34	5.33	3.34	1
FALSE	High	Master Protein	A0A100IB39	Kynurenine aminotransferase OS=Aspergillus niger OX=5061 GN=ABL_02409 PE=4 SV=1	0	5.559	4.90405	2	2	2	1	469	52.3	6.8	5.67	2
FALSE	High	Master Protein	Q45U61	Actibind OS=Aspergillus niger OX=5061 GN=ACTIB-I PE=1 SV=1	0	5.534	7.77778	2	3	2	1	270	29.9	4.21	8.89	2
FALSE	High	Master Protein	A0A1M3TJ54	cAMP-dependent protein kinase regulatory subunit OS=Aspergillus luchuensis CBS 106.47 OX=1137211 GN=ASPFODRAFT_207100 PE=3 SV=1	0	5.533	5.59611	2	2	2	1	411	44.5	5.02	5.19	2
FALSE	High	Master Protein	A0A100IRN0	Mannitol dehydrogenase OS=Aspergillus niger OX=5061 GN=ABL_08586 PE=4 SV=1	0	5.529	4.58167	2	2	2	1	502	56.1	5.82	4.58	2
FALSE	High	Master Protein	G7X6C3	CobW/P47K family protein OS=Aspergillus kawachii (strain NBRC 4308) OX=1033177 GN=AKAW_00588 PE=4 SV=1	0	5.484	9	2	2	2	1	300	32.2	6.23	5.26	2
FALSE	High	Master Protein	B8N2H2	Proteasome regulatory particle subunit Rpt4, putative OS=Aspergillus flavus (strain ATCC 200026 / FGSC A1120 / NRRL 3357 / JCM 12722 / SRRC 167) OX=332952 GN=AFLA_037470 PE=3 SV=1	0	5.47	5.32688	2	2	1	1	413	46.4	5.66	5	2
FALSE	High	Master Protein	A0A017SCX7	60S ribosomal protein L11 OS=Aspergillus ruber CBS 135680 OX=1388766 GN=EURHEDRAFT_73589 PE=3 SV=1	0	5.452	7.95455	1	1	1	1	176	20.2	9.95	3.81	1
FALSE	High	Master Protein	A0A1L9URF5	Glycerol-3-phosphate dehydrogenase OS=Aspergillus brasiliensis CBS 101740 OX=767769 GN=ASPBRDRAFT_122007 PE=3 SV=1	0	5.419	3.37553	2	3	2	1	711	77.8	7.23	4.98	2
FALSE	High	Master Protein	A0A1M3TST3	Uncharacterized protein OS=Aspergillus luchuensis CBS 106.47 OX=1137211 GN=ASPFODRAFT_42921 PE=4 SV=1	0	5.419	6.06061	1	1	1	1	198	20.8	10.68	2.79	1
FALSE	High	Master Protein	A0A146FFE9	Aldo-keto reductase OS=Aspergillus luchuensis OX=1069201 GN=RIB2604_01804360 PE=4 SV=1	0	5.418	6.74847	2	3	2	1	326	36.5	6.67	6.99	2
FALSE	High	Master Protein	A0A146FHU4	Beta-mannanase OS=Aspergillus luchuensis OX=1069201 GN=RIB2604_01807470 PE=3 SV=1	0	5.414	3.52645	1	1	1	1	397	43	4.6	2.65	1
FALSE	High	Master Protein	A0A2V5HB49	Glutamine synthetase OS=Aspergillus violaceofuscus CBS 115571 OX=1450538 GN=BO99DRAFT_423226 PE=4 SV=1	0	5.411	1.58311	1	1	1	1	1137	123.5	5.4	2.58	1
FALSE	High	Master Protein	A0A2G7GA31	Alanine aminotransferase OS=Aspergillus arachidicola OX=656916 GN=AARAC_006709 PE=4 SV=1	0	5.38	1.96464	2	2	1	1	1018	112.1	6.21	4.93	2
FALSE	High	Master Protein	A0A146FAT1	Chaperone/heat shock protein Hsp12 OS=Aspergillus luchuensis OX=1069201 GN=RIB2604_01601940 PE=4 SV=1	0	5.335	24.7191	2	2	2	1	89	9.5	6.55	5.14	2
FALSE	High	Master Protein	A0A1L9N5I5	Protein YOP1 OS=Aspergillus tubingensis CBS 134.48 OX=767770 GN=ASPTUDRAFT_120544 PE=3 SV=1	0	5.334	12.426	2	2	2	1	169	19.1	7.39	4.15	2
FALSE	High	Master Protein	A0A117E1R3	Translation release factor eRF3 OS=Aspergillus niger OX=5061 GN=ABL_04968 PE=4 SV=1	0	5.324	4.52675	3	3	3	1	729	78	8.68	5.04	3
FALSE	High	Master Protein	A0A100IEM4	DNA damage-inducible v-SNARE binding protein Ddi1 OS=Aspergillus niger OX=5061 GN=ABL_03356 PE=4 SV=1	0	5.317	2.22985	1	1	1	1	583	63.4	5.97	2.58	1
FALSE	High	Master Protein	A0A1F7ZTC5	NADH-ubiquinone oxidoreductase subunit OS=Aspergillus bombycis OX=109264 GN=ABOM_008968 PE=4 SV=1	0	5.308	1.21837	1	1	1	1	1067	118.4	5.91	2.29	1
FALSE	High	Master Protein	A0A146FGW9	Glycoside hydrolase family 2 protein OS=Aspergillus luchuensis OX=1069201 GN=RIB2604_01808640 PE=4 SV=1	0	5.299	3.07692	2	2	2	1	650	72.9	5.77	4.51	2
FALSE	High	Master Protein	A0A146F294	26S proteasome regulatory subunit rpn-8 OS=Aspergillus luchuensis OX=1069201 GN=RIB2604_00608900 PE=4 SV=1	0	5.297	6.94444	2	2	2	1	360	40.1	6.01	4.26	2
FALSE	High	Master Protein	A0A0L1IZY1	Uncharacterized protein OS=Aspergillus nomius NRRL 13137 OX=1509407 GN=ANOM_005546 PE=4 SV=1	0	5.279	1.13177	1	1	1	1	1237	134.1	6.87	2.63	1
FALSE	High	Master Protein	A2QXP0	Aspergillus niger contig An11c0330, genomic contig OS=Aspergillus niger (strain CBS 513.88 / FGSC A1513) OX=425011 GN=An11g09650 PE=4 SV=1	0	5.257	9.0379	3	4	1	1	343	39.5	9.2	9.43	3
FALSE	High	Master Protein	A0A146FE74	Mitochondrial phosphate carrier protein OS=Aspergillus luchuensis OX=1069201 GN=RIB2604_01710440 PE=3 SV=1	0	5.254	6.49652	2	2	2	1	431	46.8	8.79	4.53	2
FALSE	High	Master Protein	A0A1M3U1H0	Uncharacterized protein OS=Aspergillus luchuensis CBS 106.47 OX=1137211 GN=ASPFODRAFT_56400 PE=4 SV=1	0	5.246	10.6667	2	2	2	1	225	25.9	7.33	5.61	2
FALSE	High	Master Protein	A0A1L9S3L8	Hydrophobin OS=Aspergillus wentii DTO 134E9 OX=1073089 GN=ASPWEDRAFT_35354 PE=3 SV=1	0	5.242	7.45342	1	5	1	1	161	16	4.54	16.19	1
FALSE	High	Master Protein	G8B4N8	Histone H4 (Fragment) OS=Cloeosiphon aspergillus OX=210794 GN=h4 PE=3 SV=1	0	5.214	37.7358	2	3	1	1	53	6	10.98	8.97	2
FALSE	High	Master Protein	A0A100I6J0	Phospholipase/carboxylesterase OS=Aspergillus niger OX=5061 GN=ABL_01239 PE=4 SV=1	0	5.196	9.12863	2	2	2	1	241	27.1	5.82	4.75	2
FALSE	High	Master Protein	A0A2J5I2U6	GTP-binding protein rhoA OS=Aspergillus taichungensis OX=482145 GN=BDW42DRAFT_183753 PE=4 SV=1	0	5.19	7.73196	1	1	1	1	194	21.9	6.67	3.66	1
FALSE	High	Master Protein	A0A1M3TMB5	Uncharacterized protein OS=Aspergillus luchuensis CBS 106.47 OX=1137211 GN=ASPFODRAFT_129882 PE=3 SV=1	0	5.173	4.42748	2	2	2	1	655	72.8	6.77	4.13	2
FALSE	High	Master Protein	A0A100I8W1	Carboxylic ester hydrolase OS=Aspergillus niger OX=5061 GN=ABL_01874 PE=3 SV=1	0	5.17	3.56506	2	3	2	1	561	61.6	4.86	6.85	2
FALSE	High	Master Protein	A0A2P2HAB4	Putative NADH-ubiquinone oxidoreductase 39 kDa subunit OS=Aspergillus flavus (strain ATCC MYA-384 / AF70) OX=1392242 GN=AFLA70_176g002491 PE=4 SV=1	0	5.167	3.73134	2	2	2	1	670	76	6.86	4.82	2
FALSE	High	Master Protein	A0A146FFJ5	Glutathione S-transferase OS=Aspergillus luchuensis OX=1069201 GN=RIB2604_01800480 PE=4 SV=1	0	5.163	13.6585	3	3	3	1	205	23.8	5.52	7.03	3
FALSE	High	Master Protein	A0A100IQE2	Succinyl-CoA:3-ketoacid-coenzyme A transferase OS=Aspergillus niger OX=5061 GN=ABL_07866 PE=3 SV=1	0	5.146	4.82625	2	2	1	1	518	55.5	7.61	4.86	2
FALSE	High	Master Protein	A0A1M3TY87	Uncharacterized protein OS=Aspergillus luchuensis CBS 106.47 OX=1137211 GN=ASPFODRAFT_66247 PE=4 SV=1	0	5.145	0.509604	1	1	1	1	2551	280	6.7	2.32	1
FALSE	High	Master Protein	A0A0F8V4Z7	Uncharacterized protein OS=Aspergillus rambellii OX=308745 GN=ARAM_003391 PE=4 SV=1	0	5.113	1.24858	2	3	2	1	1762	192.4	5.31	8.11	2
FALSE	High	Master Protein	G3YG03	Glucanase (Fragment) OS=Aspergillus niger (strain ATCC 1015 / CBS 113.46 / FGSC A1144 / LSHB Ac4 / NCTC 3858a / NRRL 328 / USDA 3528.7) OX=380704 GN=ASPNIDRAFT_133986 PE=3 SV=1	0	5.111	3.64078	1	2	1	1	412	43.4	4.35	6.83	1
FALSE	High	Master Protein	A0A100IC23	Sarcosine oxidase OS=Aspergillus niger OX=5061 GN=ABL_02695 PE=4 SV=1	0	5.105	4.84581	2	2	2	1	454	49.3	6.7	5.8	2
FALSE	High	Master Protein	A0A124BWT6	Cyanate hydratase OS=Aspergillus niger OX=5061 GN=cyn1 PE=3 SV=1	0	5.096	1.61725	1	1	1	1	742	83.7	5.91	2.82	1
FALSE	High	Master Protein	A0A1M3TRT3	Glutathione peroxidase OS=Aspergillus luchuensis CBS 106.47 OX=1137211 GN=ASPFODRAFT_58169 PE=3 SV=1	0	5.091	10.9434	3	3	3	1	265	29.4	9.17	6.04	3
FALSE	High	Master Protein	A0A1L9N7Z6	Uncharacterized protein OS=Aspergillus tubingensis CBS 134.48 OX=767770 GN=ASPTUDRAFT_577483 PE=4 SV=1	0	5.086	3.31858	1	2	1	1	452	49.3	5.11	4.67	1
FALSE	High	Master Protein	A0A124BXS7	Oxidoreductase, 2-nitropropane dioxygenase family OS=Aspergillus niger OX=5061 GN=ABL_05984 PE=4 SV=1	0	5.078	5.35211	2	2	2	1	355	37.6	7.56	4.22	2
FALSE	High	Master Protein	A0A1L9N8S5	T-complex protein 1 subunit delta OS=Aspergillus tubingensis CBS 134.48 OX=767770 GN=ASPTUDRAFT_145653 PE=3 SV=1	0	5.067	2.74223	1	1	1	1	547	59	7.72	2.8	1
FALSE	High	Master Protein	A0A100IUA9	Beta-glucuronidase OS=Aspergillus niger OX=5061 GN=ABL_10137 PE=4 SV=1	0	5.057	2.21811	1	1	1	1	541	58.9	5.38	2.66	1
FALSE	High	Master Protein	A0A229XP88	Uncharacterized protein OS=Aspergillus turcosus OX=1245748 GN=CFD26_00413 PE=4 SV=1	0	5.056	1.15986	2	2	2	1	1983	221.6	6.49	4.44	2
FALSE	High	Master Protein	A0A0K8L0G8	Uncharacterized protein OS=Aspergillus udagawae OX=91492 GN=AUD_0816 PE=4 SV=1	0	5.038	5.50964	2	3	2	1	363	39.1	5.31	8.81	2
FALSE	High	Master Protein	A0A100IB18	V-type proton ATPase subunit a OS=Aspergillus niger OX=5061 GN=ABL_02399 PE=3 SV=1	0	5.021	2.58824	2	2	2	1	850	96.8	5.59	1.99	2
FALSE	High	Master Protein	A0A1M3T0P8	Uncharacterized protein OS=Aspergillus luchuensis CBS 106.47 OX=1137211 GN=ASPFODRAFT_212740 PE=4 SV=1	0	4.974	2.98063	2	2	2	1	671	74.5	6.57	5.22	2
FALSE	High	Master Protein	A0A100IJW1	Thiamine thiazole synthase OS=Aspergillus niger OX=5061 GN=ABL_04732 PE=3 SV=1	0	4.966	7.25076	2	2	2	1	331	35.5	5.69	6.69	2
FALSE	High	Master Protein	A0A1L9WSI9	Catalase OS=Aspergillus aculeatus ATCC 16872 OX=690307 GN=ASPACDRAFT_29928 PE=3 SV=1	0	4.962	3.58621	2	2	1	1	725	79.9	6.01	4.65	2
FALSE	High	Master Protein	A0A0F4YZR5	T-complex protein 1 subunit gamma OS=Rasamsonia emersonii CBS 393.64 OX=1408163 GN=T310_2356 PE=3 SV=1	0	4.956	2.26501	2	2	2	1	883	98.1	6.98	5.18	2
FALSE	High	Master Protein	A0A117E3R8	Uncharacterized protein OS=Aspergillus niger OX=5061 GN=ABL_09376 PE=4 SV=1	0	4.955	6.68896	2	3	2	1	299	33.5	6.67	6.43	2
FALSE	High	Master Protein	A2QWD1	Prolyl aminopeptidase papA-Aspergillus niger OS=Aspergillus niger (strain CBS 513.88 / FGSC A1513) OX=425011 GN=papA PE=4 SV=1	0	4.925	4.89237	2	2	2	1	511	57.7	6.67	4.64	2
FALSE	High	Master Protein	A0A100IPR0	Extracellular invertase OS=Aspergillus niger OX=5061 GN=ABL_07765 PE=3 SV=1	0	4.924	2.07006	1	1	1	1	628	68	5.08	3.67	1
FALSE	High	Master Protein	A0A100IKI2	5-methyltetrahydropteroyltriglutamate-homocysteine methyltransferase OS=Aspergillus niger OX=5061 GN=ABL_05558 PE=4 SV=1	0	4.913	3.50877	1	1	1	1	399	45.1	5.72	2.74	1
FALSE	High	Master Protein	A0A146EXU9	HHE domain protein OS=Aspergillus luchuensis OX=1069201 GN=RIB2604_00100060 PE=4 SV=1	0	4.89	10.8597	2	2	2	1	221	25.2	6.35	4.67	2
FALSE	High	Master Protein	A0A124BXH6	Delta-1-pyrroline-5-carboxylate dehydrogenase PrnC OS=Aspergillus niger OX=5061 GN=ABL_05084 PE=3 SV=1	0	4.888	2.41265	2	3	2	1	1202	130.7	7.42	6.53	2
FALSE	High	Master Protein	A0A100ICU6	ABC transporter OS=Aspergillus niger OX=5061 GN=ABL_02825 PE=4 SV=1	0	4.871	1.92132	2	2	2	1	1093	120.1	5.6	4.3	2
FALSE	High	Master Protein	A0A100I8D7	Fatty acid oxygenase OS=Aspergillus niger OX=5061 GN=ABL_01732 PE=4 SV=1	0	4.869	1.08108	1	1	1	1	1110	125.1	6.7	2.81	1
FALSE	High	Master Protein	A0A254TNE2	Tubulin/FtsZ family GTPase domain family protein OS=Aspergillus niger OX=5061 GN=CAN33_47340 PE=3 SV=1	0	4.852	2.47453	1	1	1	1	687	75.4	5.71	2.72	1
FALSE	High	Master Protein	A0A1L9NC60	Uncharacterized protein OS=Aspergillus tubingensis CBS 134.48 OX=767770 GN=ASPTUDRAFT_495968 PE=4 SV=1	0	4.839	3.26264	2	2	2	1	613	69.2	5.44	4.61	2
FALSE	High	Master Protein	A0A117E041	Ribose 5-phosphate isomerase A OS=Aspergillus niger OX=5061 GN=ABL_04649 PE=4 SV=1	0	4.837	8.79121	2	3	2	1	273	28.4	5.76	6.61	2
FALSE	High	Master Protein	A0A0F8VC96	Eukaryotic translation initiation factor 2 subunit gamma OS=Aspergillus rambellii OX=308745 GN=ARAM_000323 PE=4 SV=1	0	4.824	3.0185	3	3	3	1	1027	111.7	6.68	4.51	3
FALSE	High	Master Protein	A0A254UEI1	MOSC N-terminal beta barrel domain family protein OS=Aspergillus niger OX=5061 GN=CAN33_22615 PE=4 SV=1	0	4.817	3.38164	2	2	2	1	621	69	6.8	3.84	2
FALSE	High	Master Protein	A0A254TM29	Uncharacterized protein OS=Aspergillus niger OX=5061 GN=CAN33_45000 PE=4 SV=1	0	4.794	12.6316	2	2	2	1	190	21.9	9.2	5.43	2
FALSE	High	Master Protein	A0A124BWE4	Oxidoreductase, short-chain dehydrogenase/reductase family OS=Aspergillus niger OX=5061 GN=ABL_02892 PE=4 SV=1	0	4.768	3.7037	1	1	1	1	297	31.9	6.25	2.64	1
FALSE	High	Master Protein	A0A117E3N6	Tripeptidyl peptidase Sed3 OS=Aspergillus niger OX=5061 GN=ABL_09241 PE=4 SV=1	0	4.745	3.57143	2	3	2	1	588	64	4.74	7.55	2
FALSE	High	Master Protein	A0A100IP62	Amidohydrolase OS=Aspergillus niger OX=5061 GN=ABL_07481 PE=4 SV=1	0	4.715	5.63063	2	2	2	1	444	48	5.47	5.28	2
FALSE	High	Master Protein	A0A146F4J4	GMC oxidoreductase OS=Aspergillus luchuensis OX=1069201 GN=RIB2604_01001210 PE=3 SV=1	0	4.691	5.39216	3	3	3	1	612	66	5.16	6.01	3
FALSE	High	Master Protein	A0A2T5LW81	Peptidyl-prolyl cis-trans isomerase OS=Aspergillus ochraceoroseus IBT 24754 OX=1392256 GN=P175DRAFT_0457923 PE=4 SV=1	0	4.671	10.6061	1	1	1	1	132	14.3	9.41	2.39	1
FALSE	High	Master Protein	A0A117DYY8	Uncharacterized protein OS=Aspergillus niger OX=5061 GN=ABL_03499 PE=4 SV=1	0	4.667	13.5417	1	1	1	1	96	10.2	5.49	2.87	1
FALSE	High	Master Protein	A0A1L9U8L4	Uncharacterized protein OS=Aspergillus brasiliensis CBS 101740 OX=767769 GN=ASPBRDRAFT_58604 PE=3 SV=1	0	4.632	10.0402	2	2	2	1	249	27.1	4.21	4.35	2
FALSE	High	Master Protein	A0A1L9N4W9	Uncharacterized protein OS=Aspergillus tubingensis CBS 134.48 OX=767770 GN=ASPTUDRAFT_190681 PE=4 SV=1	0	4.629	4.85232	2	2	2	1	474	54	6.13	4.14	2
FALSE	High	Master Protein	A0A146FMR3	GrpE protein homolog OS=Aspergillus luchuensis OX=1069201 GN=RIB2604_02100570 PE=3 SV=1	0	4.615	8.01527	2	2	2	1	262	30.1	9.54	4.7	2
FALSE	High	Master Protein	A0A1L9N1Z0	Uncharacterized protein OS=Aspergillus tubingensis CBS 134.48 OX=767770 GN=ASPTUDRAFT_57254 PE=4 SV=1	0	4.614	9.06736	3	4	1	1	386	43.8	8.65	9.87	3
FALSE	High	Master Protein	A0A117E4E4	Proteasome regulatory particle subunit OS=Aspergillus niger OX=5061 GN=ABL_09243 PE=4 SV=1	0	4.597	8.63309	2	2	2	1	278	30.9	4.89	3.96	2
FALSE	High	Master Protein	A0A117E0U5	Serine peptidase, family S28 OS=Aspergillus niger OX=5061 GN=ABL_05671 PE=4 SV=1	0	4.577	2.31317	1	1	1	1	562	61.8	4.48	3.05	1
FALSE	High	Master Protein	A0A0L1J7S7	Conidiation-specific protein 10 OS=Aspergillus nomius NRRL 13137 OX=1509407 GN=ANOM_004413 PE=4 SV=1	0	4.56	17.8571	1	2	1	1	84	8.9	8.59	5.33	1
FALSE	High	Master Protein	A0A1L9NMT7	Uncharacterized protein OS=Aspergillus tubingensis CBS 134.48 OX=767770 GN=ASPTUDRAFT_250486 PE=4 SV=1	0	4.549	4.79616	2	2	2	1	417	45.3	4.92	4.39	2
FALSE	High	Master Protein	A0A100ITT4	Patatin-like serine hydrolase OS=Aspergillus niger OX=5061 GN=ABL_09867 PE=4 SV=1	0	4.545	2.2619	1	1	1	1	840	91.2	7.97	2.42	1
FALSE	High	Master Protein	A0A0L1JE34	Mitogen-activated protein kinase OS=Aspergillus nomius NRRL 13137 OX=1509407 GN=ANOM_001559 PE=3 SV=1	0	4.544	2.00348	2	2	2	1	1148	129	5.52	4.83	2
FALSE	High	Master Protein	A0A146F4B3	Glyoxalase family protein OS=Aspergillus luchuensis OX=1069201 GN=RIB2604_00804290 PE=4 SV=1	0	4.539	9.48905	1	1	1	1	137	15.2	6.51	2.33	1
FALSE	High	Master Protein	A0A117E1I3	Extracellular cellulase CelA/allergen Asp F7-like OS=Aspergillus niger OX=5061 GN=ABL_06779 PE=4 SV=1	0	4.526	2.24299	1	1	1	1	535	53.5	4.11	2.86	1
FALSE	High	Master Protein	A2QWJ9	Aspergillus niger contig An11c0210, genomic contig (Fragment) OS=Aspergillus niger (strain CBS 513.88 / FGSC A1513) OX=425011 GN=An11g05460 PE=3 SV=1	0	4.514	4.09357	2	2	2	1	513	56.2	7.08	4.56	2
FALSE	High	Master Protein	A0A2V5HAE2	Amidase OS=Aspergillus violaceofuscus CBS 115571 OX=1450538 GN=BO99DRAFT_400955 PE=4 SV=1	0	4.509	2.37624	1	1	1	1	505	55.3	6.62	2.64	1
FALSE	High	Master Protein	A0A1F7ZVU9	Triosephosphate isomerase OS=Aspergillus bombycis OX=109264 GN=ABOM_008839 PE=3 SV=1	0	4.491	8.04196	2	2	2	1	286	30.4	5.87	4.18	2
FALSE	High	Master Protein	A0A100ISJ8	Coatomer subunit alpha OS=Aspergillus niger OX=5061 GN=ABL_09216 PE=4 SV=1	0	4.479	1.23762	1	1	1	1	1212	136	6.28	3.09	1
FALSE	High	Master Protein	A0A2V5H4Y5	RNA-binding domain-containing protein OS=Aspergillus violaceofuscus CBS 115571 OX=1450538 GN=BO99DRAFT_484167 PE=4 SV=1	0	4.477	6.13333	2	3	2	1	375	39.5	5.78	6.87	2
FALSE	High	Master Protein	G7X7I7	Similar to An04g02920 OS=Aspergillus kawachii (strain NBRC 4308) OX=1033177 GN=AKAW_00880 PE=4 SV=1	0	4.476	8.125	1	2	1	1	160	17.7	4.41	6.33	1
FALSE	High	Master Protein	A0A146FCV0	LRP16 family protein OS=Aspergillus luchuensis OX=1069201 GN=RIB2604_01708540 PE=4 SV=1	0	4.455	5.71429	2	2	2	1	350	38.3	4.78	3.97	2
FALSE	High	Master Protein	A5ABE5	Carboxylic ester hydrolase OS=Aspergillus niger (strain CBS 513.88 / FGSC A1513) OX=425011 GN=An11g00100 PE=3 SV=1	0	4.405	2.40964	1	1	1	1	581	62.8	4.93	2.43	1
FALSE	High	Master Protein	A0A100I6G0	Probable alpha-L-arabinofuranosidase axhA OS=Aspergillus niger OX=5061 GN=ABL_01224 PE=4 SV=1	0	4.37	8.43373	2	3	2	1	332	36	4.87	4.66	2
FALSE	High	Master Protein	A0A1L9NIW0	Uncharacterized protein OS=Aspergillus tubingensis CBS 134.48 OX=767770 GN=ASPTUDRAFT_50254 PE=4 SV=1	0	4.368	7.84314	1	1	1	1	153	16.3	7.66	2.87	1
FALSE	High	Master Protein	A0A254U6S5	Cytochrome P450 family protein OS=Aspergillus niger OX=5061 GN=CAN33_28535 PE=3 SV=1	0	4.358	1.92555	1	1	1	1	779	88.5	6.21	2.53	1
FALSE	High	Master Protein	A0A0K8L782	Conidiation-specific protein 10 OS=Aspergillus udagawae OX=91492 GN=AUD_3125 PE=4 SV=1	0	4.349	16.129	1	1	1	1	93	9.8	8.56	2.44	1
FALSE	High	Master Protein	G7Y1Y7	Dynamin family protein OS=Aspergillus kawachii (strain NBRC 4308) OX=1033177 GN=AKAW_11308 PE=3 SV=1	0	4.346	2.81481	2	3	2	1	675	75.6	5.97	5.71	2
FALSE	High	Master Protein	A0A100I3U9	Thioredoxin reductase OS=Aspergillus niger OX=5061 GN=ABL_00553 PE=3 SV=1	0	4.327	0.659341	1	1	1	1	1820	200	6.95	1.9	1
FALSE	High	Master Protein	A0A1L9UC97	Uncharacterized protein OS=Aspergillus brasiliensis CBS 101740 OX=767769 GN=ASPBRDRAFT_77492 PE=4 SV=1	0	4.298	4.23012	3	3	3	1	591	64.3	7.02	5.87	3
FALSE	High	Master Protein	A0A1L9V0Y8	Uncharacterized protein OS=Aspergillus brasiliensis CBS 101740 OX=767769 GN=ASPBRDRAFT_25232 PE=4 SV=1	0	4.288	3.00668	2	2	2	1	898	100.5	5.88	2.42	2
FALSE	High	Master Protein	A0A124BUR9	Glycogen debranching enzyme Gdb1 OS=Aspergillus niger OX=5061 GN=ABL_00375 PE=4 SV=1	0	4.268	0.847817	2	2	2	1	2359	266.8	6.47	2.05	2
FALSE	High	Master Protein	A0A1L9N697	Uncharacterized protein OS=Aspergillus tubingensis CBS 134.48 OX=767770 GN=ASPTUDRAFT_64793 PE=4 SV=1	0	4.247	9.32203	1	2	1	1	118	13	5.02	5.07	1
FALSE	High	Master Protein	A0A1L9NP82	Uncharacterized protein OS=Aspergillus tubingensis CBS 134.48 OX=767770 GN=ASPTUDRAFT_26490 PE=4 SV=1	0	4.228	8.05369	1	1	1	1	149	17.1	5.21	2.73	1
FALSE	High	Master Protein	G7XW03	Translation initiation inhibitor OS=Aspergillus kawachii (strain NBRC 4308) OX=1033177 GN=AKAW_09226 PE=4 SV=1	0	4.223	7.10059	1	2	1	1	169	18.3	8.72	5.56	1
FALSE	High	Master Protein	A0A1R3S0S0	Uncharacterized protein OS=Aspergillus carbonarius (strain ITEM 5010) OX=602072 GN=ASPCADRAFT_502671 PE=4 SV=1	0	4.216	1.28205	2	2	2	1	1872	205.7	6.28	4.94	2
FALSE	High	Master Protein	A0A1L9RWE9	Eukaryotic translation initiation factor 3 subunit E OS=Aspergillus wentii DTO 134E9 OX=1073089 GN=INT6 PE=3 SV=1	0	4.21	2.54777	1	1	1	1	471	54.3	5.43	2.16	1
FALSE	High	Master Protein	A0A117E2P4	Thioredoxin OS=Aspergillus niger OX=5061 GN=ABL_08624 PE=4 SV=1	0	4.208	13.3803	2	2	2	1	142	15.8	8.84	5.36	2
FALSE	High	Master Protein	A0A0K8L818	60S ribosomal protein L24 OS=Aspergillus udagawae OX=91492 GN=AUD_3207 PE=4 SV=1	0	4.202	2.83912	2	2	2	1	634	69.5	9.8	3.95	2
FALSE	High	Master Protein	A0A1L9NI83	Uncharacterized protein OS=Aspergillus tubingensis CBS 134.48 OX=767770 GN=ASPTUDRAFT_49900 PE=4 SV=1	0	4.197	12.3377	2	2	2	1	154	16.8	10.89	5.71	2
FALSE	High	Master Protein	A0A142HXW6	Glyceraldehyde-3-phosphate dehydrogenase OS=Mucilaginibacter sp. PAMC 26640 OX=1300914 GN=A0256_20950 PE=3 SV=1	0	4.192	6.0423	2	3	1	1	331	35.5	6.19	8.03	2
FALSE	High	Master Protein	A0A1M3U1Z9	Inositol-1-monophosphatase OS=Aspergillus luchuensis CBS 106.47 OX=1137211 GN=ASPFODRAFT_178446 PE=3 SV=1	0	4.183	8.88158	2	2	2	1	304	33.4	5.3	4.3	2
FALSE	High	Master Protein	A0A254TTC9	LSM domain family protein OS=Aspergillus niger OX=5061 GN=CAN33_54270 PE=4 SV=1	0	4.162	2.80488	2	3	2	1	820	92.1	6.06	5.95	2
FALSE	High	Master Protein	A0A146FC71	Methylglutaconyl-CoA hydratase, mitochondrial OS=Aspergillus luchuensis OX=1069201 GN=RIB2604_01706070 PE=4 SV=1	0	4.158	6.95364	2	2	2	1	302	32.6	8.43	5.25	2
FALSE	High	Master Protein	A0A1F7ZK42	Transport protein SEC61 subunit alpha OS=Aspergillus bombycis OX=109264 GN=ABOM_011586 PE=3 SV=1	0	4.15	2.18295	2	2	2	1	962	105.6	6.77	4.85	2
FALSE	High	Master Protein	A0A100IHT5	Fad NAD binding oxidoreductase OS=Aspergillus niger OX=5061 GN=ABL_03918 PE=4 SV=1	0	4.147	3.65854	1	1	1	1	410	43.4	7.03	2.36	1
FALSE	High	Master Protein	A0A146FZL5	Similar to An15g00620 OS=Aspergillus luchuensis OX=1069201 GN=RIB2604_03600590 PE=4 SV=1	0	4.127	9.34579	2	4	2	1	214	22.6	5.25	9.9	2
FALSE	High	Master Protein	A0A1L9U8W1	Uncharacterized protein OS=Aspergillus brasiliensis CBS 101740 OX=767769 GN=ASPBRDRAFT_318556 PE=4 SV=1	0	4.121	3.23529	2	2	2	1	680	75.8	4.68	5.82	2
FALSE	High	Master Protein	A0A2G7G4T2	D-galactonate dehydratase OS=Aspergillus arachidicola OX=656916 GN=AARAC_011800 PE=4 SV=1	0	4.11	3.71287	1	1	1	1	404	44.6	5.5	2.42	1
FALSE	High	Master Protein	A0A100IEB4	Splicing factor u2af large subunit OS=Aspergillus niger OX=5061 GN=ABL_03259 PE=4 SV=1	0	4.086	1.80723	1	1	1	1	664	74.8	5.44	2.54	1
FALSE	High	Master Protein	A0A100IQX0	Nascent polypeptide-associated complex subunit beta OS=Aspergillus niger OX=5061 GN=ABL_08353 PE=3 SV=1	0	4.081	1.91205	1	2	1	1	523	57.3	7.43	2.06	1
FALSE	High	Master Protein	A2QAU7	Aspergillus niger contig An01c0390, genomic contig OS=Aspergillus niger (strain CBS 513.88 / FGSC A1513) OX=425011 GN=An01g12810 PE=4 SV=1	0	4.074	9.90991	2	2	2	1	222	25	8.87	4	2
FALSE	High	Master Protein	A0A124BWQ1	Extracellular dioxygenase OS=Aspergillus niger OX=5061 GN=ABL_03409 PE=4 SV=1	0	4.073	6.21622	1	1	1	1	370	40.1	5.11	2.78	1
FALSE	High	Master Protein	A0A2G7EM30	Putative aminotransferase OS=Aspergillus arachidicola OX=656916 GN=AARAC_008741 PE=4 SV=1	0	4.056	0.77332	1	1	1	1	2069	231.5	6.23	4.28	1
FALSE	High	Master Protein	A0A1L9N8M2	Uncharacterized protein OS=Aspergillus tubingensis CBS 134.48 OX=767770 GN=ASPTUDRAFT_189586 PE=4 SV=1	0	4.051	9.01639	2	2	2	1	244	27.5	7.66	3.94	2
FALSE	High	Master Protein	A0A117E2E5	Beta-glucosidase OS=Aspergillus niger OX=5061 GN=ABL_08131 PE=3 SV=1	0	4.047	0.33389	1	2	1	1	3594	397.2	7.01	5.05	1
FALSE	High	Master Protein	G7XTZ9	Beta-glucosidase 1 OS=Aspergillus kawachii (strain NBRC 4308) OX=1033177 GN=AKAW_08522 PE=4 SV=1	0	4.015	2.08768	2	2	2	1	958	104.2	5.94	1.89	2
FALSE	High	Master Protein	A0A1L9RR31	Uncharacterized protein OS=Aspergillus wentii DTO 134E9 OX=1073089 GN=ASPWEDRAFT_26781 PE=3 SV=1	0	4.011	3.03797	1	1	1	1	395	41.4	4.92	3.24	1
FALSE	High	Master Protein	A0A1S9D633	Recombination/repair protein Rad50 OS=Aspergillus oryzae OX=5062 GN=OAory_01051210 PE=3 SV=1	0	4.002	1.1713	2	2	2	1	2049	232.2	6.16	4.16	2
FALSE	High	Master Protein	A0A100IK30	Cell wall glycosyl hydrolase YteR OS=Aspergillus niger OX=5061 GN=ABL_05350 PE=4 SV=1	0	3.994	3.09524	1	1	1	1	420	47	4.51	2.75	1
FALSE	High	Master Protein	A0A1V0VGU7	Histidine kinase OS=Kitasatospora albolonga OX=68173 GN=B7C62_33550 PE=4 SV=1	0	3.983	2.00364	1	2	1	1	549	60.3	6.21	5.07	1
FALSE	High	Master Protein	A0A1L9U3Z0	1,3-beta-glucanosyltransferase OS=Aspergillus brasiliensis CBS 101740 OX=767769 GN=ASPBRDRAFT_49018 PE=3 SV=1	0	3.954	2.21811	1	1	1	1	541	57	4.35	2.24	1
FALSE	High	Master Protein	A0A146FQW3	Secretion-associated GTP-binding protein OS=Aspergillus luchuensis OX=1069201 GN=RIB2604_02110720 PE=4 SV=1	0	3.945	7.49064	2	2	2	1	267	30.2	6.8	0	2
FALSE	High	Master Protein	G7X932	Similar to An18g04120 OS=Aspergillus kawachii (strain NBRC 4308) OX=1033177 GN=AKAW_01530 PE=4 SV=1	0	3.924	22.9508	2	3	2	1	122	13.2	5.12	5.96	2
FALSE	High	Master Protein	A0A1L9U6U4	Uncharacterized protein OS=Aspergillus brasiliensis CBS 101740 OX=767769 GN=ASPBRDRAFT_135783 PE=4 SV=1	0	3.91	5.04451	1	2	1	1	337	36.8	9.03	0	1
FALSE	High	Master Protein	A0A146F7B7	Fumarylacetoacetase OS=Aspergillus luchuensis OX=1069201 GN=RIB2604_01502160 PE=4 SV=1	0	3.91	4.87239	2	2	2	1	431	47.1	6.39	4.94	2
FALSE	High	Master Protein	A0A1M3U137	Uncharacterized protein OS=Aspergillus luchuensis CBS 106.47 OX=1137211 GN=ASPFODRAFT_77209 PE=4 SV=1	0	3.904	6.63717	1	1	1	1	226	24.7	8.7	2.52	1
FALSE	High	Master Protein	G3YA88	Uncharacterized protein OS=Aspergillus niger (strain ATCC 1015 / CBS 113.46 / FGSC A1144 / LSHB Ac4 / NCTC 3858a / NRRL 328 / USDA 3528.7) OX=380704 GN=ASPNIDRAFT_55175 PE=4 SV=1	0	3.903	7.64331	1	1	1	1	157	17.1	6.54	2.52	1
FALSE	High	Master Protein	A0A1M3T5Y6	Uncharacterized protein OS=Aspergillus luchuensis CBS 106.47 OX=1137211 GN=ASPFODRAFT_143573 PE=4 SV=1	0	3.897	6.71141	3	3	3	1	447	48.5	6.37	1.89	3
FALSE	High	Master Protein	A0A100IL48	NPP1 domain protein OS=Aspergillus niger OX=5061 GN=ABL_05556 PE=4 SV=1	0	3.893	7.96813	2	2	2	1	251	26.8	4.63	4.17	2
FALSE	High	Master Protein	A0A1L9NBQ9	Uncharacterized protein OS=Aspergillus tubingensis CBS 134.48 OX=767770 GN=ASPTUDRAFT_27580 PE=4 SV=1	0	3.856	1.36646	1	1	1	1	805	87.3	4.87	2.96	1
FALSE	High	Master Protein	A0A117DYI9	GPI anchored cell wall protein OS=Aspergillus niger OX=5061 GN=ABL_02298 PE=4 SV=1	0	3.852	1.99275	1	1	1	1	552	55.5	3.99	2.84	1
FALSE	High	Master Protein	A0A117DVH6	Ring finger protein OS=Aspergillus niger OX=5061 GN=ABL_00963 PE=3 SV=1	0	3.844	1.07623	1	1	1	1	1115	120.8	6.64	2.82	1
FALSE	High	Master Protein	A0A1L9NEM5	Uncharacterized protein OS=Aspergillus tubingensis CBS 134.48 OX=767770 GN=ASPTUDRAFT_51358 PE=4 SV=1	0	3.842	8	2	2	2	1	300	31.6	6.37	4.51	2
FALSE	High	Master Protein	A0A2K4ZXD8	Uncharacterized protein OS=Aspergillus niger OX=5061 GN=ATCC64974_21050 PE=4 SV=1	0	3.793	10.4972	2	2	2	1	181	19.9	9.47	4.66	2
FALSE	High	Master Protein	A0A117E1A5	Palmitoyl-protein thioesterase OS=Aspergillus niger OX=5061 GN=ABL_06409 PE=4 SV=1	0	3.782	2.98507	1	1	1	1	402	45	5.3	2.79	1
FALSE	High	Master Protein	A0A146FPZ9	WD domain protein OS=Aspergillus luchuensis OX=1069201 GN=RIB2604_02301620 PE=3 SV=1	0	3.769	2.27273	1	1	1	1	572	63.3	6.84	2.51	1
FALSE	High	Master Protein	A0A100I7B5	Probable xaa-pro aminopeptidase An01g13040 OS=Aspergillus niger OX=5061 GN=ABL_01441 PE=3 SV=1	0	3.764	2.64766	1	1	1	1	491	55.1	6.33	2.69	1
FALSE	High	Master Protein	A0A146F5V4	Dolichyl-diphosphooligosaccharide--protein glycosyltransferase subunit OST2 OS=Aspergillus luchuensis OX=1069201 GN=RIB2604_01003770 PE=3 SV=1	0	3.755	11.9318	1	1	1	1	176	17.6	9.13	2.44	1
FALSE	High	Master Protein	A0A1L9UXG6	Uncharacterized protein OS=Aspergillus brasiliensis CBS 101740 OX=767769 GN=ASPBRDRAFT_408894 PE=4 SV=1	0	3.751	5.07614	1	1	1	1	197	22	5.08	3.34	1
FALSE	High	Master Protein	A0A254U227	Uncharacterized protein OS=Aspergillus niger OX=5061 GN=CAN33_19575 PE=4 SV=1	0	3.749	6.38298	1	1	1	1	188	19.9	6.15	3.07	1
FALSE	High	Master Protein	A0A117E1S6	Uncharacterized protein OS=Aspergillus niger OX=5061 GN=ABL_06046 PE=4 SV=1	0	3.74	12.8205	1	1	1	1	78	9.5	4.53	1.76	1
FALSE	High	Master Protein	A0A124BY56	Calcium-transporting ATPase OS=Aspergillus niger OX=5061 GN=ABL_07154 PE=3 SV=1	0	3.735	1.35135	1	1	1	1	1036	111.5	5.66	1.79	1
FALSE	High	Master Protein	A0A0F8X5H3	Uncharacterized protein OS=Aspergillus ochraceoroseus OX=138278 GN=AOCH_002755 PE=4 SV=1	0	3.729	2.8314	2	2	2	1	777	85.3	6.13	2.9	2
FALSE	High	Master Protein	A0A100IPI9	NADH-ubiquinone dehydrogenase 24 kDa subunit OS=Aspergillus niger OX=5061 GN=ABL_07625 PE=4 SV=1	0	3.723	2.47619	1	1	1	1	525	57.6	7.59	2.31	1
FALSE	High	Master Protein	A0A117E323	Phenylacetyl-CoA ligase OS=Aspergillus niger OX=5061 GN=ABL_08161 PE=4 SV=1	0	3.716	3.2646	2	2	2	1	582	63.8	8.03	3.69	2
FALSE	High	Master Protein	A0A2I1C9I2	Ubiquitin-like protein OS=Aspergillus novofumigatus IBT 16806 OX=1392255 GN=P174DRAFT_420837 PE=4 SV=1	0	3.714	8.8	1	1	1	1	125	14.6	8.75	2.17	1
FALSE	High	Master Protein	G7XER2	Dimeric dihydrodiol dehydrogenase OS=Aspergillus kawachii (strain NBRC 4308) OX=1033177 GN=AKAW_03717 PE=4 SV=1	0	3.696	6.03865	2	2	2	1	414	46	6.42	4.08	2
FALSE	High	Master Protein	A0A100IHZ5	Unnamed protein product OS=Aspergillus niger OX=5061 GN=ABL_04251 PE=4 SV=1	0	3.689	2.15558	2	2	2	1	1067	117.9	7.25	3.68	2
FALSE	High	Master Protein	A0A100ILY6	Similar to An16g04350 OS=Aspergillus niger OX=5061 GN=ABL_05917 PE=4 SV=1	0	3.681	1.67832	1	1	1	1	715	77.2	5.16	2.86	1
FALSE	High	Master Protein	A0A0J5Q854	Ubiquitin-like protein DskB OS=Aspergillus fumigatus Z5 OX=1437362 GN=Y699_04464 PE=4 SV=1	0	3.676	2.75424	1	1	1	1	472	48.6	5.26	2.27	1
FALSE	High	Master Protein	A0A254U1Z2	Lyase family protein OS=Aspergillus niger OX=5061 GN=CAN33_19390 PE=4 SV=1	0	3.665	1.22222	1	1	1	1	900	99.4	5.73	2.61	1
FALSE	High	Master Protein	A0A100ISA0	Malic enzyme OS=Aspergillus niger OX=5061 GN=ABL_09036 PE=3 SV=1	0	3.662	2.05415	2	2	2	1	1071	117.3	6.6	4.07	2
FALSE	High	Master Protein	A0A254UD77	Exportin 1-like protein family protein OS=Aspergillus niger OX=5061 GN=CAN33_0685 PE=4 SV=1	0	3.661	2.11268	2	2	2	1	994	111.2	5.05	3.88	2
FALSE	High	Master Protein	A0A100ISB6	Indoleamine 2,3-dioxygenase family protein OS=Aspergillus niger OX=5061 GN=ABL_09069 PE=4 SV=1	0	3.655	2.63158	1	1	1	1	494	55.5	5.48	3.43	1
FALSE	High	Master Protein	A0A1L9NKR5	Uncharacterized protein OS=Aspergillus tubingensis CBS 134.48 OX=767770 GN=ASPTUDRAFT_132937 PE=4 SV=1	0	3.648	1.49254	1	1	1	1	737	79.6	8.46	2.23	1
FALSE	High	Master Protein	A0A100I6Y0	Amidase family protein OS=Aspergillus niger OX=5061 GN=ABL_01138 PE=4 SV=1	0	3.636	1.42303	1	1	1	1	773	83.9	5.47	2.42	1
FALSE	High	Master Protein	A0A1M3SYU5	Uncharacterized protein OS=Aspergillus luchuensis CBS 106.47 OX=1137211 GN=ASPFODRAFT_201249 PE=4 SV=1	0	3.634	2.56917	1	1	1	1	506	55.6	7.21	2.71	1
FALSE	High	Master Protein	A0A0J5SE31	Polysaccharide deacetylase family protein OS=Aspergillus fumigatus Z5 OX=1437362 GN=Y699_07197 PE=4 SV=1	0	3.623	3.23529	1	1	1	1	340	39.3	6.18	2.8	1
FALSE	High	Master Protein	A0A117E189	Exo-1,3-beta-glucanase D OS=Aspergillus niger OX=5061 GN=ABL_05191 PE=4 SV=1	0	3.61	1.26024	2	2	2	1	1587	179.2	5.66	5.12	2
FALSE	High	Master Protein	A0A117DYP4	40S ribosomal protein S6 OS=Aspergillus niger OX=5061 GN=ABL_02441 PE=3 SV=1	0	3.608	6.32911	1	1	1	1	237	27.1	10.9	2.21	1
FALSE	High	Master Protein	A0A100IMP0	Class II aldolase/adducin domain protein OS=Aspergillus niger OX=5061 GN=ABL_06684 PE=4 SV=1	0	3.591	3.40136	1	1	1	1	294	31.7	6.46	2.21	1
FALSE	High	Master Protein	A0A117E376	ThiJ/PfpI family protein OS=Aspergillus niger OX=5061 GN=ABL_09346 PE=4 SV=1	0	3.586	5.12821	1	1	1	1	234	24.8	5.54	2.26	1
FALSE	High	Master Protein	A0A0F4YZQ7	Nucleolar protein 58 OS=Rasamsonia emersonii CBS 393.64 OX=1408163 GN=T310_2382 PE=4 SV=1	0	3.586	2.13115	1	1	1	1	610	67.2	7.05	2.46	1
FALSE	High	Master Protein	A0A0U5G9Z3	Putative Histone H1 OS=Aspergillus calidoustus OX=454130 GN=ASPCAL10911 PE=3 SV=1	0	3.581	6.51163	1	1	1	1	215	22.6	10.81	3.05	1
FALSE	High	Master Protein	A0A1R3RZ66	Uncharacterized protein OS=Aspergillus carbonarius (strain ITEM 5010) OX=602072 GN=ASPCADRAFT_203607 PE=3 SV=1	0	3.57	3.33333	2	2	2	1	570	62.5	5.55	5	2
FALSE	High	Master Protein	A0A146G0L5	Norsolorinic acid reductase OS=Aspergillus luchuensis OX=1069201 GN=RIB2604_04000320 PE=4 SV=1	0	3.56	6.78851	2	2	2	1	383	42.5	6.81	4.73	2
FALSE	High	Master Protein	A0A146F012	Proteasome endopeptidase complex OS=Aspergillus luchuensis OX=1069201 GN=RIB2604_00601650 PE=3 SV=1	0	3.555	6.35838	2	2	2	1	346	37.2	7.52	4.4	2
FALSE	High	Master Protein	A0A097KZT4	Cytochrome c oxidase subunit 2 OS=Aspergillus ustus OX=40382 GN=cox2 PE=3 SV=1	0	3.554	3.95257	1	2	1	1	253	29.1	4.77	5.16	1
FALSE	High	Master Protein	A0A146FZR2	O-methyltransferase OS=Aspergillus luchuensis OX=1069201 GN=RIB2604_03500040 PE=4 SV=1	0	3.536	4.62287	2	2	2	1	411	45.6	7.71	4.47	2
FALSE	High	Master Protein	A0A2G7G8Y2	Cytochrome b2 (Fragment) OS=Aspergillus arachidicola OX=656916 GN=AARAC_011580 PE=3 SV=1	0	3.533	2.27704	1	1	1	1	527	58.4	6.18	1.99	1
FALSE	High	Master Protein	A0A146FTG5	Phospholipase OS=Aspergillus luchuensis OX=1069201 GN=RIB2604_02801080 PE=3 SV=1	0	3.524	2.10356	2	2	2	1	1236	138.1	6.57	2.22	2
FALSE	High	Master Protein	A0A100IUA0	C1 tetrahydrofolate synthase OS=Aspergillus niger OX=5061 GN=ABL_10176 PE=3 SV=1	0	3.517	2.55591	2	2	2	1	939	100.6	6.87	4.11	2
FALSE	High	Master Protein	A0A1L9NAL5	Uncharacterized protein OS=Aspergillus tubingensis CBS 134.48 OX=767770 GN=ASPTUDRAFT_187722 PE=3 SV=1	0	3.515	12.1212	1	1	1	1	99	10.8	7.05	2.27	1
FALSE	High	Master Protein	A0A1L9UWI9	Uncharacterized protein OS=Aspergillus brasiliensis CBS 101740 OX=767769 GN=ASPBRDRAFT_117017 PE=4 SV=1	0	3.514	1.4333	1	1	1	1	907	94.2	6.55	2.36	1
FALSE	High	Master Protein	A0A254U3Y5	Uncharacterized protein OS=Aspergillus niger OX=5061 GN=ATCC64974_11410 PE=4 SV=1	0	3.513	2.95082	1	3	1	1	305	34	4.49	5.61	1
FALSE	High	Master Protein	A0A0F4Z006	Transcription factor (Sin3) OS=Rasamsonia emersonii CBS 393.64 OX=1408163 GN=T310_2124 PE=4 SV=1	0	3.497	0.508318	1	1	1	1	2164	244.5	7.01	1.96	1
FALSE	High	Master Protein	A0A2V5H3H3	Cysteine synthase OS=Aspergillus violaceofuscus CBS 115571 OX=1450538 GN=BO99DRAFT_219867 PE=4 SV=1	0	3.495	3.44828	1	1	1	1	377	40.2	7.75	2.64	1
FALSE	High	Master Protein	A0A0J5PPG1	Proteasome regulatory particle subunit Rpt5 OS=Aspergillus fumigatus Z5 OX=1437362 GN=Y699_06685 PE=3 SV=1	0	3.473	1.59091	2	2	2	1	1320	148.8	5.52	0	2
FALSE	High	Master Protein	A0A117E1S1	CFEM domain protein OS=Aspergillus niger OX=5061 GN=ABL_07158 PE=4 SV=1	0	3.471	5.39216	1	1	1	1	204	19.9	6.89	2.61	1
FALSE	High	Master Protein	A0A146FTG3	Bifunctional pyrimidine biosynthesis protein OS=Aspergillus luchuensis OX=1069201 GN=RIB2604_02603110 PE=3 SV=1	0	3.453	0.834431	2	2	1	1	2277	250.1	6.43	4.62	2
FALSE	High	Master Protein	A0A146F034	Dihydroxyacetone kinase OS=Aspergillus luchuensis OX=1069201 GN=RIB2604_00400930 PE=4 SV=1	0	3.421	3.60656	2	2	2	1	610	65.4	6.11	2.09	2
FALSE	High	Master Protein	A0A1M3T1Y2	Amine oxidase OS=Aspergillus luchuensis CBS 106.47 OX=1137211 GN=ASPFODRAFT_38151 PE=3 SV=1	0	3.42	3.71429	2	2	2	1	700	79.5	6.65	4.04	2
FALSE	High	Master Protein	A0A0K8LNK7	Actin-related protein 2/3 complex subunit 2 OS=Aspergillus udagawae OX=91492 GN=AUD_8880 PE=4 SV=1	0	3.416	0.884173	1	1	1	1	1131	127.9	7.11	2.38	1
FALSE	High	Master Protein	A0A0F4YU70	Septin OS=Rasamsonia emersonii CBS 393.64 OX=1408163 GN=T310_4178 PE=3 SV=1	0	3.402	3.1941	1	1	1	1	407	46	5.27	2.47	1
FALSE	High	Master Protein	A0A231MSY4	Uncharacterized protein OS=Aspergillus thermomutatus OX=41047 GN=CDV56_00145 PE=4 SV=1	0	3.39	0.677757	1	1	1	1	1623	179.9	7.5	1.96	1
FALSE	High	Master Protein	A0A254TU46	Phosphomannose isomerase type I family protein OS=Aspergillus niger OX=5061 GN=CAN33_5205 PE=3 SV=1	0	3.379	1.97628	1	1	1	1	506	56.8	6.25	2.34	1
FALSE	High	Master Protein	A0A100ILV1	AMP-binding enzyme OS=Aspergillus niger OX=5061 GN=ABL_05976 PE=4 SV=1	0	3.378	2.27596	1	1	1	1	703	77.6	7.18	1.82	1
FALSE	High	Master Protein	A0A1L9N3K5	Uncharacterized protein OS=Aspergillus tubingensis CBS 134.48 OX=767770 GN=ASPTUDRAFT_121660 PE=4 SV=1	0	3.368	2.02206	1	1	1	1	544	60.1	6.16	2.57	1
FALSE	High	Master Protein	A0A0K8LBQ6	AP-2 complex subunit beta OS=Aspergillus udagawae OX=91492 GN=AUD_4363 PE=4 SV=1	0	3.359	2.11931	2	2	2	1	1274	139.8	5.63	1.71	2
FALSE	High	Master Protein	A0A146FM90	Actin-related protein 2/3 complex subunit 5 OS=Aspergillus luchuensis OX=1069201 GN=RIB2604_02104710 PE=3 SV=1	0	3.355	7.32984	1	1	1	1	191	20.4	5.59	2.72	1
FALSE	High	Master Protein	A0A1M3TYA3	3-isopropylmalate dehydratase OS=Aspergillus luchuensis CBS 106.47 OX=1137211 GN=ASPFODRAFT_123077 PE=3 SV=1	0	3.355	2.84605	2	2	2	1	773	84	6.19	2.27	2
FALSE	High	Master Protein	A0A100IBX6	Epoxide hydrolase OS=Aspergillus niger OX=5061 GN=ABL_02632 PE=3 SV=1	0	3.352	1.4158	2	2	2	1	1342	149	6.19	4.43	2
FALSE	High	Master Protein	A0A100ISM8	MGS207 protein OS=Aspergillus niger OX=5061 GN=ABL_09263 PE=4 SV=1	0	3.31	3.1941	1	1	1	1	407	47	6.27	2.45	1
FALSE	High	Master Protein	A0A254TQ95	Ribosomal protein L21e family protein OS=Aspergillus niger OX=5061 GN=CAN33_50540 PE=4 SV=1	0	3.307	9.13706	2	2	2	1	197	22.5	10.42	4.92	2
FALSE	High	Master Protein	G3XP39	Cell wall biogenesis protein OS=Aspergillus niger (strain ATCC 1015 / CBS 113.46 / FGSC A1144 / LSHB Ac4 / NCTC 3858a / NRRL 328 / USDA 3528.7) OX=380704 GN=cwpA PE=4 SV=1	0	3.305	7.29167	2	2	2	1	288	28.3	4.55	4.27	2
FALSE	High	Master Protein	A0A100INA5	Vanillin dehydrogenase OS=Aspergillus niger OX=5061 GN=ABL_06999 PE=4 SV=1	0	3.302	2.90456	1	1	1	1	482	51.3	6.1	2.83	1
FALSE	High	Master Protein	A0A1M3TQS0	Carbohydrate esterase family 8 protein OS=Aspergillus luchuensis CBS 106.47 OX=1137211 GN=ASPFODRAFT_215818 PE=4 SV=1	0	3.299	3.25815	1	1	1	1	399	43.3	5.24	3.18	1
FALSE	High	Master Protein	A0A1M3TY72	Tryptophan synthase OS=Aspergillus luchuensis CBS 106.47 OX=1137211 GN=ASPFODRAFT_55372 PE=3 SV=1	0	3.274	1.52355	1	1	1	1	722	77.2	6.16	3.13	1
FALSE	High	Master Protein	Q5B366	Uncharacterized protein OS=Emericella nidulans (strain FGSC A4 / ATCC 38163 / CBS 112.46 / NRRL 194 / M139) OX=227321 GN=AN5014.2 PE=4 SV=1	0	3.262	16.6667	2	2	2	1	132	15	9.55	4.84	2
FALSE	High	Master Protein	A0A100ILA4	40S ribosomal protein S15 OS=Aspergillus niger OX=5061 GN=ABL_05964 PE=3 SV=1	0	3.231	7.97546	1	1	1	1	163	18.9	9.99	3.23	1
FALSE	High	Master Protein	A0A146EYA0	Exo-inulinase OS=Aspergillus luchuensis OX=1069201 GN=RIB2604_00102370 PE=3 SV=1	0	3.218	1.76991	1	1	1	1	678	74.7	5.92	0	1
FALSE	High	Master Protein	A0A100IR49	Short-chain dehydrogenase OS=Aspergillus niger OX=5061 GN=ABL_08495 PE=4 SV=1	0	3.217	1.85874	1	1	1	1	538	59.4	5.58	1.65	1
FALSE	High	Master Protein	A0A2I2F4F2	Chromatin remodeling and histone acetyltransferase complexes subunit OS=Aspergillus candidus OX=41067 GN=BDW47DRAFT_110223 PE=3 SV=1	0	3.215	4.43975	2	2	2	1	473	51.2	5.38	4.37	2
FALSE	High	Master Protein	A0A1M3TI21	Uncharacterized protein OS=Aspergillus luchuensis CBS 106.47 OX=1137211 GN=ASPFODRAFT_32635 PE=4 SV=1	0	3.212	3.60111	1	1	1	1	361	42	8.16	1.99	1
FALSE	High	Master Protein	A0A146F2G7	Inosine-5'-monophosphate dehydrogenase OS=Aspergillus luchuensis OX=1069201 GN=RIB2604_00606980 PE=3 SV=1	0	3.212	2.01835	1	1	1	1	545	57.9	7.21	2.32	1
FALSE	High	Master Protein	A0A100I7V8	L-arabitol dehydrogenase OS=Aspergillus niger OX=5061 GN=ABL_01603 PE=3 SV=1	0	3.209	4.66321	2	3	2	1	386	41.3	6.19	4.31	2
FALSE	High	Master Protein	A0A2K5AKR9	Uncharacterized protein OS=Aspergillus niger OX=5061 GN=ATCC64974_102250 PE=4 SV=1	0	3.208	2.78481	1	1	1	1	395	44.6	7.47	2.05	1
FALSE	High	Master Protein	A0A117E2H8	Choline oxidase OS=Aspergillus niger OX=5061 GN=ABL_06228 PE=4 SV=1	0	3.203	2.35081	1	1	1	1	553	61.4	6.43	2.12	1
FALSE	High	Master Protein	A0A1L9UQC8	Uncharacterized protein OS=Aspergillus brasiliensis CBS 101740 OX=767769 GN=ASPBRDRAFT_517510 PE=4 SV=1	0	3.2	15.3226	1	1	1	1	124	13.4	6.23	2.53	1
FALSE	High	Master Protein	A0A100IN41	Fungal specific transcription factor OS=Aspergillus niger OX=5061 GN=ABL_06651 PE=4 SV=1	0	3.189	1.03806	1	1	1	1	1156	128	6.54	2.37	1
FALSE	High	Master Protein	A0A146FBP5	Similar to An03g01060 OS=Aspergillus luchuensis OX=1069201 GN=RIB2604_01700270 PE=4 SV=1	0	3.184	11.2069	1	1	1	1	116	12.5	5.87	2.64	1
FALSE	High	Master Protein	A0A2K5A6Z9	Uncharacterized protein OS=Aspergillus niger OX=5061 GN=ATCC64974_54390 PE=4 SV=1	0	3.137	10.7438	1	1	1	1	121	12.6	8.46	4.33	1
FALSE	High	Master Protein	P33559	Endo-1,4-beta-xylanase A OS=Aspergillus kawachii (strain NBRC 4308) OX=1033177 GN=xynA PE=1 SV=2	0	3.133	6.72783	2	2	2	1	327	35.5	6.35	3.99	2
FALSE	High	Master Protein	A0A100IN28	Uncharacterized protein OS=Aspergillus niger OX=5061 GN=ABL_06547 PE=4 SV=1	0	3.129	4.41176	1	1	1	1	272	29.2	4.39	2.06	1
FALSE	High	Master Protein	A0A117DZ46	Delta(24(24(1)))-sterol reductase OS=Aspergillus niger OX=5061 GN=ABL_02788 PE=4 SV=1	0	3.125	1.69014	2	3	2	1	1065	120.1	6.87	1.62	2
FALSE	High	Master Protein	A0A124BZ01	CobW domain protein OS=Aspergillus niger OX=5061 GN=ABL_09812 PE=3 SV=1	0	3.12	1.10442	1	1	1	1	996	111.1	4.73	3.05	1
FALSE	High	Master Protein	A0A1L9MZD3	Uncharacterized protein OS=Aspergillus tubingensis CBS 134.48 OX=767770 GN=ASPTUDRAFT_58081 PE=3 SV=1	0	3.117	4.8583	2	2	2	1	494	53.6	6.42	5.06	2
FALSE	High	Master Protein	A0A124BYP1	Replication protein A subunit OS=Aspergillus niger OX=5061 GN=ABL_08822 PE=3 SV=1	0	3.087	1.81518	1	1	1	1	606	67.8	6	2.85	1
FALSE	High	Master Protein	A0A146FI21	MSP domain protein OS=Aspergillus luchuensis OX=1069201 GN=RIB2604_02001220 PE=4 SV=1	0	3.086	3.48432	1	1	1	1	287	31.3	5.19	2.38	1
FALSE	High	Master Protein	A0A1M3TWQ0	Uncharacterized protein OS=Aspergillus luchuensis CBS 106.47 OX=1137211 GN=ASPFODRAFT_41549 PE=4 SV=1	0	3.08	3.38462	1	1	1	1	325	35	6.11	3.09	1
FALSE	High	Master Protein	A0A117E0X7	60S ribosomal protein L28 OS=Aspergillus niger OX=5061 GN=ABL_04037 PE=4 SV=1	0	3.043	9.15033	1	1	1	1	153	16.6	10.36	3.04	1
FALSE	High	Master Protein	A0A100IMS3	Succinate-semialdehyde dehydrogenase OS=Aspergillus niger OX=5061 GN=ABL_06720 PE=4 SV=1	0	3.037	2.61044	1	1	1	1	498	53.9	6.48	2.46	1
FALSE	High	Master Protein	A0A1L9NBR6	Uncharacterized protein OS=Aspergillus tubingensis CBS 134.48 OX=767770 GN=ASPTUDRAFT_27704 PE=4 SV=1	0	3.035	4.5045	1	2	1	1	222	25.1	5.39	5.35	1
FALSE	High	Master Protein	A2R3I5	Aspergillus niger contig An14c0150, genomic contig OS=Aspergillus niger (strain CBS 513.88 / FGSC A1513) OX=425011 GN=An14g04410 PE=4 SV=1	0	3.021	3.38462	1	1	1	1	325	35.3	5.5	2.22	1
FALSE	High	Master Protein	G3XMW1	Uncharacterized protein OS=Aspergillus niger (strain ATCC 1015 / CBS 113.46 / FGSC A1144 / LSHB Ac4 / NCTC 3858a / NRRL 328 / USDA 3528.7) OX=380704 GN=ASPNIDRAFT_54353 PE=4 SV=1	0	3.018	2.58824	1	1	1	1	425	48.4	6.87	1.81	1
FALSE	High	Master Protein	A0A1M3TMJ9	Uncharacterized protein OS=Aspergillus luchuensis CBS 106.47 OX=1137211 GN=ASPFODRAFT_129990 PE=4 SV=1	0	3.012	3.34262	1	1	1	1	359	39.4	7.91	0	1
FALSE	High	Master Protein	A0A1L9WPD2	Uncharacterized protein OS=Aspergillus aculeatus ATCC 16872 OX=690307 GN=ASPACDRAFT_1858030 PE=4 SV=1	0	3.009	5.80357	1	3	1	1	224	26.1	10.32	6.92	1
FALSE	High	Master Protein	A2Q7X9	Aspergillus niger contig An01c0080, genomic contig OS=Aspergillus niger (strain CBS 513.88 / FGSC A1513) OX=425011 GN=An01g02320 PE=4 SV=1	0	3.008	12.2642	2	2	2	1	212	23.8	4.88	3.49	2
FALSE	High	Master Protein	A0A100I860	EstA OS=Aspergillus niger OX=5061 GN=ABL_01314 PE=3 SV=1	0	3.002	2.23267	2	2	2	1	851	92.8	5.29	4.87	2
FALSE	High	Master Protein	A0A1M3TG41	Uncharacterized protein OS=Aspergillus luchuensis CBS 106.47 OX=1137211 GN=ASPFODRAFT_33374 PE=4 SV=1	0	2.995	4.6683	2	2	2	1	407	44.7	7.8	4.48	2
FALSE	High	Master Protein	A0A1L9V1E3	Uncharacterized protein OS=Aspergillus brasiliensis CBS 101740 OX=767769 GN=ASPBRDRAFT_141850 PE=3 SV=1	0	2.988	2.43478	1	1	1	1	575	61.7	4.89	2.01	1
FALSE	High	Master Protein	A0A1M3TI98	Carbohydrate-binding module family 1 protein OS=Aspergillus luchuensis CBS 106.47 OX=1137211 GN=ASPFODRAFT_133732 PE=3 SV=1	0	2.987	2.10728	1	1	1	1	522	55.1	4.69	2.86	1
FALSE	High	Master Protein	A0A0L1JG03	Uncharacterized protein OS=Aspergillus nomius NRRL 13137 OX=1509407 GN=ANOM_001098 PE=3 SV=1	0	2.987	1.32979	1	1	1	1	752	83.1	6.18	2.64	1
FALSE	High	Master Protein	A0A1L9N5G2	Uncharacterized protein OS=Aspergillus tubingensis CBS 134.48 OX=767770 GN=ASPTUDRAFT_30469 PE=4 SV=1	0	2.985	2.12355	1	1	1	1	518	54.8	7.43	2.76	1
FALSE	High	Master Protein	A0A146F2M0	GPR/FUN34 family protein OS=Aspergillus luchuensis OX=1069201 GN=RIB2604_00607490 PE=4 SV=1	0	2.985	3.97351	1	2	1	1	302	32.5	6.19	5.72	1
FALSE	High	Master Protein	A2R426	Aspergillus niger contig An14c0190, genomic contig OS=Aspergillus niger (strain CBS 513.88 / FGSC A1513) OX=425011 GN=An14g06330 PE=4 SV=1	0	2.974	4.20712	1	1	1	1	309	34.4	5.96	2.18	1
FALSE	High	Master Protein	A0A100IAY6	Similar to An04g04940 OS=Aspergillus niger OX=5061 GN=ABL_02375 PE=4 SV=1	0	2.959	4.24242	1	1	1	1	330	35.5	9.19	2.11	1
FALSE	High	Master Protein	A2R7V9	Aspergillus niger contig An16c0170, genomic contig OS=Aspergillus niger (strain CBS 513.88 / FGSC A1513) OX=425011 GN=An16g04930 PE=3 SV=1	0	2.95	10.9091	1	1	1	1	110	11.1	4.17	2.22	1
FALSE	High	Master Protein	A0A124BY88	DNA repair protein Rad18 OS=Aspergillus niger OX=5061 GN=ABL_07458 PE=4 SV=1	0	2.948	0.656716	1	1	1	1	1675	190.1	6.57	2.3	1
FALSE	High	Master Protein	A0A100I5S5	RTA1 domain protein OS=Aspergillus niger OX=5061 GN=ABL_01117 PE=4 SV=1	0	2.945	2.86885	1	2	1	1	488	55	8.56	5.62	1
FALSE	High	Master Protein	G7XRN5	Uncharacterized protein OS=Aspergillus kawachii (strain NBRC 4308) OX=1033177 GN=AKAW_07790 PE=4 SV=1	0	2.927	4.88722	1	1	1	1	266	26.4	8.88	3.23	1
FALSE	High	Master Protein	A0A229WYT3	Uncharacterized protein OS=Aspergillus turcosus OX=1245748 GN=CDV55_05438 PE=4 SV=1	0	2.923	2.94118	1	1	1	1	510	57.3	9	2.7	1
FALSE	High	Master Protein	A0A117E027	NADPH--cytochrome P450 reductase OS=Aspergillus niger OX=5061 GN=cprA PE=3 SV=1	0	2.919	3.02158	2	2	2	1	695	76.5	5.33	3.25	2
FALSE	High	Master Protein	A0A1F7ZMZ8	Ribosomal protein S5 (Fragment) OS=Aspergillus bombycis OX=109264 GN=ABOM_010866 PE=3 SV=1	0	2.914	7.38255	2	2	2	1	298	32.8	10.54	4.33	2
FALSE	High	Master Protein	A0A1M3TKP3	Uncharacterized protein OS=Aspergillus luchuensis CBS 106.47 OX=1137211 GN=ASPFODRAFT_132682 PE=4 SV=1	0	2.887	11.6883	2	3	2	1	154	18.4	5.35	5.56	2
FALSE	High	Master Protein	A0A146EY10	Syntaxin OS=Aspergillus luchuensis OX=1069201 GN=RIB2604_00300430 PE=4 SV=1	0	2.866	2.98507	1	1	1	1	335	37.3	5.08	2.02	1
FALSE	High	Master Protein	A0A0L1J2Y9	Alcohol dehydrogenase OS=Aspergillus nomius NRRL 13137 OX=1509407 GN=ANOM_004866 PE=4 SV=1	0	2.858	3.06604	1	1	1	1	424	44.7	6.16	2.94	1
FALSE	High	Master Protein	A0A146F222	Similar to An01g15030 OS=Aspergillus luchuensis OX=1069201 GN=RIB2604_00700130 PE=4 SV=1	0	2.858	4.92611	1	1	1	1	203	23.6	9.44	2.07	1
FALSE	High	Master Protein	A0A146F2W4	Phospho-2-dehydro-3-deoxyheptonate aldolase OS=Aspergillus luchuensis OX=1069201 GN=RIB2604_00701710 PE=3 SV=1	0	2.85	3.2345	1	1	1	1	371	40.1	6.74	2.27	1
FALSE	High	Master Protein	A0A100IF68	Retinol dehydrogenase 12 OS=Aspergillus niger OX=5061 GN=ABL_03461 PE=4 SV=1	0	2.839	3.80117	1	1	1	1	342	37.1	6.35	0	1
FALSE	High	Master Protein	Q5BDT1	Uncharacterized protein OS=Emericella nidulans (strain FGSC A4 / ATCC 38163 / CBS 112.46 / NRRL 194 / M139) OX=227321 GN=AN1299.2 PE=3 SV=1	0	2.838	1.07239	1	1	1	1	1119	122.1	8.46	2.15	1
FALSE	High	Master Protein	A0A254U3X0	Pyridoxal-dependent decarboxylase conserved domain family protein OS=Aspergillus niger OX=5061 GN=CAN33_41190 PE=4 SV=1	0	2.821	1.70068	1	1	1	1	882	100.7	6.52	2.13	1
FALSE	High	Master Protein	A0A254U9J7	Piwi domain family protein OS=Aspergillus niger OX=5061 GN=CAN33_9570 PE=4 SV=1	0	2.812	1.10701	1	1	1	1	1084	118.5	9.01	2.85	1
FALSE	High	Master Protein	A0A1L9UZX1	Uncharacterized protein OS=Aspergillus brasiliensis CBS 101740 OX=767769 GN=ASPBRDRAFT_654468 PE=3 SV=1	0	2.802	2.58303	1	1	1	1	542	61.5	5.2	2.3	1
FALSE	High	Master Protein	A0A0F8V2T6	Uncharacterized protein (Fragment) OS=Aspergillus ochraceoroseus OX=138278 GN=AOCH_001800 PE=4 SV=1	0	2.791	2.48902	2	2	2	1	683	74.8	8.94	4.25	2
FALSE	High	Master Protein	A0A1L9UY66	Uncharacterized protein OS=Aspergillus brasiliensis CBS 101740 OX=767769 GN=ASPBRDRAFT_39094 PE=4 SV=1	0	2.786	3.87597	1	1	1	1	258	27.9	6.3	3.17	1
FALSE	High	Master Protein	A0A0U4ZGY3	Putative T-complex protein 1 subunit alpha OS=Aspergillus calidoustus OX=454130 GN=ASPCAL12062 PE=3 SV=1	0	2.772	1.93662	1	1	1	1	568	61.7	6.95	2.51	1
FALSE	High	Master Protein	A0A2K4ZYV3	Uncharacterized protein OS=Aspergillus niger OX=5061 GN=ATCC64974_26110 PE=4 SV=1	0	2.753	3.23625	1	1	1	1	309	34.1	5.45	3.08	1
FALSE	High	Master Protein	A0A2G7FTU3	Eukaryotic translation initiation factor 3 subunit L OS=Aspergillus arachidicola OX=656916 GN=AARAC_004430 PE=3 SV=1	0	2.744	1.00825	1	1	1	1	1091	124	5.77	2.24	1
FALSE	High	Master Protein	A0A1L9NPL1	Uncharacterized protein OS=Aspergillus tubingensis CBS 134.48 OX=767770 GN=ASPTUDRAFT_38184 PE=4 SV=1	0	2.741	2.28137	2	2	2	1	789	86.9	4.98	2.45	2
FALSE	High	Master Protein	A0A1R3RVA5	Uncharacterized protein OS=Aspergillus carbonarius (strain ITEM 5010) OX=602072 GN=ASPCADRAFT_205635 PE=3 SV=1	0	2.736	4.03226	1	1	1	1	248	27.8	10.02	2.48	1
FALSE	High	Master Protein	A0A124BXE6	Similar to An11g03160 OS=Aspergillus niger OX=5061 GN=ABL_04848 PE=4 SV=1	0	2.705	1.62095	1	1	1	1	802	91	8.41	2.13	1
FALSE	High	Master Protein	A0A1L9UWY1	Uncharacterized protein OS=Aspergillus brasiliensis CBS 101740 OX=767769 GN=ASPBRDRAFT_38431 PE=4 SV=1	0	2.699	5.62249	1	1	1	1	249	27.3	5.01	3.47	1
FALSE	High	Master Protein	A0A1M3U0L4	Glycoside hydrolase family 31 protein OS=Aspergillus luchuensis CBS 106.47 OX=1137211 GN=ASPFODRAFT_214212 PE=3 SV=1	0	2.693	1.67428	1	1	1	1	657	75.4	5.53	2.57	1
FALSE	High	Master Protein	A0A1M3TA21	Uncharacterized protein OS=Aspergillus luchuensis CBS 106.47 OX=1137211 GN=ASPFODRAFT_73045 PE=4 SV=1	0	2.685	5.53191	1	1	1	1	235	25.7	5.2	2.11	1
FALSE	High	Master Protein	A0A146FGG1	Acid phosphatase OS=Aspergillus luchuensis OX=1069201 GN=RIB2604_01802180 PE=4 SV=1	0	2.678	1.21269	1	1	1	1	1072	119.9	5.01	2.35	1
FALSE	High	Master Protein	G7XJ65	Uncharacterized protein OS=Aspergillus kawachii (strain NBRC 4308) OX=1033177 GN=AKAW_05203 PE=4 SV=1	0	2.669	3.60656	1	1	1	1	305	34.6	4.67	2.55	1
FALSE	High	Master Protein	A0A100IME3	Scramblase family protein OS=Aspergillus niger OX=5061 GN=ABL_06525 PE=4 SV=1	0	2.661	2.06677	1	1	1	1	629	67.8	5.19	2.36	1
FALSE	High	Master Protein	A0A1E3B6J9	Methylenetetrahydrofolate reductase OS=Aspergillus cristatus OX=573508 GN=SI65_08090 PE=3 SV=1	0	2.642	1.63205	1	1	1	1	674	75.6	6.16	2.05	1
FALSE	High	Master Protein	A0A100ILU9	2,4-dihydroxyhept-2-ene-1,7-dioic acid aldolase OS=Aspergillus niger OX=5061 GN=ABL_06263 PE=4 SV=1	0	2.616	3.90879	1	1	1	1	307	33.1	6.37	1.86	1
FALSE	High	Master Protein	A0A1R3RVX4	Uncharacterized protein OS=Aspergillus carbonarius (strain ITEM 5010) OX=602072 GN=ASPCADRAFT_2053 PE=3 SV=1	0	2.613	6.32184	1	1	1	1	174	19.8	11	2.68	1
FALSE	High	Master Protein	A0A0F8X9F9	Vesicle transport v-snare protein OS=Aspergillus rambellii OX=308745 GN=ARAM_000950 PE=4 SV=1	0	2.61	4.70588	1	1	1	1	255	29.2	5.78	2.38	1
FALSE	High	Master Protein	G3YBH9	40S ribosomal protein S27 (Fragment) OS=Aspergillus niger (strain ATCC 1015 / CBS 113.46 / FGSC A1144 / LSHB Ac4 / NCTC 3858a / NRRL 328 / USDA 3528.7) OX=380704 GN=ASPNIDRAFT_179599 PE=3 SV=1	0	2.608	20	1	1	1	1	80	8.6	9.03	1.92	1
FALSE	High	Master Protein	A0A146F5A4	ATP dependent RNA helicase OS=Aspergillus luchuensis OX=1069201 GN=RIB2604_00900390 PE=3 SV=1	0	2.607	3.37478	2	3	2	1	563	62.2	5.8	6.09	2
FALSE	High	Master Protein	Q0CTF7	Serine palmitoyltransferase 2 OS=Aspergillus terreus (strain NIH 2624 / FGSC A1156) OX=341663 GN=ATEG_03027 PE=3 SV=1	0	2.601	2.12766	2	2	2	1	893	99.1	9.64	5.22	2
FALSE	High	Master Protein	A0A100I2Z4	EF hand domain protein OS=Aspergillus niger OX=5061 GN=ABL_00339 PE=3 SV=1	0	2.598	0.677583	1	1	1	1	1771	190	4.82	3.01	1
FALSE	High	Master Protein	A0A100IGJ9	Acetylornithine aminotransferase OS=Aspergillus niger OX=5061 GN=ABL_03843 PE=3 SV=1	0	2.576	2.32068	1	1	1	1	474	50.9	7.93	2.5	1
FALSE	High	Master Protein	A0A0S7DG14	Putative mitochondrial 2-oxoglutarate/malate carrier protein OS=Aspergillus lentulus OX=293939 GN=ALT_0691 PE=3 SV=1	0	2.572	2.64706	1	1	1	1	340	36.8	10.18	1.75	1
FALSE	High	Master Protein	G7Y222	GTP cyclohydrolase I OS=Aspergillus kawachii (strain NBRC 4308) OX=1033177 GN=AKAW_11343 PE=3 SV=1	0	2.571	5.74713	1	1	1	1	174	19.6	8.6	2.12	1
FALSE	High	Master Protein	A0A1L9NKC5	Uncharacterized protein OS=Aspergillus tubingensis CBS 134.48 OX=767770 GN=ASPTUDRAFT_195204 PE=3 SV=1	0	2.565	2.39808	1	1	1	1	417	45.7	5.95	2.22	1
FALSE	High	Master Protein	Q0CWF9	Uncharacterized protein OS=Aspergillus terreus (strain NIH 2624 / FGSC A1156) OX=341663 GN=ATEG_01975 PE=4 SV=1	0	2.564	3.58974	1	1	1	1	390	43.5	6.14	2.14	1
FALSE	High	Master Protein	A0A1L9UNE9	Uncharacterized protein OS=Aspergillus brasiliensis CBS 101740 OX=767769 GN=ASPBRDRAFT_495303 PE=4 SV=1	0	2.562	6.04396	1	1	1	1	182	19.2	8.65	2.45	1
FALSE	High	Master Protein	A0A254U5M3	Cytoskeletal-regulatory complex EF hand family protein OS=Aspergillus niger OX=5061 GN=CAN33_10550 PE=4 SV=1	0	2.551	0.841424	1	1	1	1	1545	168.7	6.57	1.72	1
FALSE	High	Master Protein	A0A100IS51	Phosphotransferase OS=Aspergillus niger OX=5061 GN=ABL_08782 PE=3 SV=1	0	2.546	2.04082	1	1	1	1	490	54.1	5.33	2.89	1
FALSE	High	Master Protein	A0A0K8L2V0	Cofilin OS=Aspergillus udagawae OX=91492 GN=AUD_1636 PE=3 SV=1	0	2.545	5.58659	1	2	1	1	179	20.3	8.38	4.67	1
FALSE	High	Master Protein	A0A1L9NFY7	Uncharacterized protein OS=Aspergillus tubingensis CBS 134.48 OX=767770 GN=ASPTUDRAFT_135670 PE=4 SV=1	0	2.537	3.11751	1	1	1	1	417	46.1	6.38	1.85	1
FALSE	High	Master Protein	A0A117E2I5	NADH-ubiquinone oxidoreductase 105 kDa subunit OS=Aspergillus niger OX=5061 GN=ABL_08373 PE=4 SV=1	0	2.533	15.9574	1	1	1	1	94	10.7	9.86	2.18	1
FALSE	High	Master Protein	A0A231M134	Uncharacterized protein OS=Aspergillus thermomutatus OX=41047 GN=CDV56_09850 PE=4 SV=1	0	2.533	0.668648	1	1	1	1	1346	149.9	8.38	0	1
FALSE	High	Master Protein	A0A1L9WK58	Uncharacterized protein OS=Aspergillus aculeatus ATCC 16872 OX=690307 GN=ASPACDRAFT_125190 PE=3 SV=1	0	2.529	2.81955	1	1	1	1	532	59.4	6.89	1.8	1
FALSE	High	Master Protein	A0A0F8V2F0	Uncharacterized protein OS=Aspergillus rambellii OX=308745 GN=ARAM_004848 PE=3 SV=1	0	2.519	1.77134	1	1	1	1	621	67.8	6.99	3.07	1
FALSE	High	Master Protein	A0A1L9NMU1	Uncharacterized protein OS=Aspergillus tubingensis CBS 134.48 OX=767770 GN=ASPTUDRAFT_114187 PE=3 SV=1	0	2.518	2.59067	1	1	1	1	386	43.2	4.89	2.73	1
FALSE	High	Master Protein	A0A1M3TJ51	Uncharacterized protein OS=Aspergillus luchuensis CBS 106.47 OX=1137211 GN=ASPFODRAFT_46366 PE=4 SV=1	0	2.514	3.51759	1	2	1	1	398	44.5	5.55	0	1
FALSE	High	Master Protein	A0A2G7G438	Alpha-glucosidase OS=Aspergillus arachidicola OX=656916 GN=AARAC_007240 PE=4 SV=1	0	2.508	0.929752	1	1	1	1	968	112.3	5.6	2.24	1
FALSE	High	Master Protein	A0A1L9V376	Nicotinate-nucleotide pyrophosphorylase [carboxylating] OS=Aspergillus brasiliensis CBS 101740 OX=767769 GN=ASPBRDRAFT_114727 PE=3 SV=1	0	2.505	2.83912	1	1	1	1	317	33.8	6.73	2.52	1
FALSE	High	Master Protein	A0A100IGF5	Oxidoreductase, short-chain dehydrogenase/reductase family OS=Aspergillus niger OX=5061 GN=ABL_03806 PE=4 SV=1	0	2.499	3.78549	1	1	1	1	317	33.1	8.92	0	1
FALSE	High	Master Protein	A0A1L9NAU3	Uncharacterized protein OS=Aspergillus tubingensis CBS 134.48 OX=767770 GN=ASPTUDRAFT_116398 PE=4 SV=1	0	2.492	2.40964	1	1	1	1	498	54.9	8.75	2.62	1
FALSE	High	Master Protein	A0A2K5A6Q8	Uncharacterized protein OS=Aspergillus niger OX=5061 GN=ATCC64974_53450 PE=4 SV=1	0	2.481	0.914077	1	1	1	1	1094	100.5	4.11	2.44	1
FALSE	High	Master Protein	A0A254TSZ7	NADH:flavin oxidoreductase / NADH oxidase family protein OS=Aspergillus niger OX=5061 GN=CAN33_55340 PE=4 SV=1	0	2.48	1.89753	1	1	1	1	527	57	6.48	2.09	1
FALSE	High	Master Protein	A0A1M3T604	Cytosolic Fe-S cluster assembly factor CFD1 OS=Aspergillus luchuensis CBS 106.47 OX=1137211 GN=CFD1 PE=3 SV=1	0	2.467	2.02429	1	1	1	1	741	79.5	5.01	1.9	1
FALSE	High	Master Protein	A0A254TVI8	Nuclear protein 96 family protein OS=Aspergillus niger OX=5061 GN=CAN33_6090 PE=4 SV=1	0	2.465	0.641658	1	1	1	1	2026	214	5.58	2.22	1
FALSE	High	Master Protein	A0A100IE24	Dolichyl-diphosphooligosaccharide--protein glycosyltransferase subunit WBP1 OS=Aspergillus niger OX=5061 GN=ABL_03174 PE=3 SV=1	0	2.461	2.18341	1	1	1	1	458	51.2	6.29	2.18	1
FALSE	High	Master Protein	A0A1L9U9Z7	Uncharacterized protein OS=Aspergillus brasiliensis CBS 101740 OX=767769 GN=ASPBRDRAFT_46720 PE=4 SV=1	0	2.452	10.2041	1	2	1	1	98	10.5	5	4.36	1
FALSE	High	Master Protein	A0A0L1IRG3	Cytochrome b5-like heme binding domain-containing protein OS=Aspergillus nomius NRRL 13137 OX=1509407 GN=ANOM_011074 PE=3 SV=1	0	2.447	11.9048	1	1	1	1	84	9.4	9.47	2.61	1
FALSE	High	Master Protein	Q5BGB5	Proliferating cell nuclear antigen OS=Emericella nidulans (strain FGSC A4 / ATCC 38163 / CBS 112.46 / NRRL 194 / M139) OX=227321 GN=AN0415.2 PE=3 SV=1	0	2.436	1.15425	1	1	1	1	953	105.9	6.39	2.81	1
FALSE	High	Master Protein	A0A100IPF4	DsDNA-binding protein PDCD5 OS=Aspergillus niger OX=5061 GN=ABL_07356 PE=4 SV=1	0	2.434	6.66667	1	1	1	1	165	18.6	5.66	2.49	1
FALSE	High	Master Protein	A0A1M3TJI0	Uncharacterized protein OS=Aspergillus luchuensis CBS 106.47 OX=1137211 GN=ASPFODRAFT_71291 PE=4 SV=1	0	2.429	2.68456	1	1	1	1	447	50.5	6.58	1.64	1
FALSE	High	Master Protein	A0A100IJF3	Rhamnogalacturonate lyase B OS=Aspergillus niger OX=5061 GN=ABL_04641 PE=4 SV=1	0	2.429	1.65913	1	1	1	1	663	73.7	5.08	2.58	1
FALSE	High	Master Protein	A0A2P2HTY5	Cell polarity protein OS=Aspergillus flavus (strain ATCC MYA-384 / AF70) OX=1392242 GN=AFLA70_88g003051 PE=4 SV=1	0	2.42	0.689655	1	1	1	1	1885	208.8	7.83	1.85	1
FALSE	High	Master Protein	Q0CFC4	Cytochrome c oxidase polypeptide V, mitochondrial OS=Aspergillus terreus (strain NIH 2624 / FGSC A1156) OX=341663 GN=ATEG_07610 PE=4 SV=1	0	2.418	5.5	1	1	1	1	200	22.1	10.26	1.74	1
FALSE	High	Master Protein	A0A1M3TBN2	Uncharacterized protein OS=Aspergillus luchuensis CBS 106.47 OX=1137211 GN=ASPFODRAFT_209832 PE=4 SV=1	0	2.415	4.23077	1	1	1	1	260	28.4	6.07	1.92	1
FALSE	High	Master Protein	A0A1L9VGX7	Uncharacterized protein OS=Aspergillus glaucus CBS 516.65 OX=1160497 GN=ASPGLDRAFT_128785 PE=4 SV=1	0	2.393	2.04082	1	1	1	1	441	49.4	5.22	1.61	1
FALSE	High	Master Protein	A0A017SCC8	Oxysterol binding protein OS=Aspergillus ruber CBS 135680 OX=1388766 GN=EURHEDRAFT_457294 PE=4 SV=1	0	2.388	2.36407	1	1	1	1	423	47.5	7.02	2.36	1
FALSE	High	Master Protein	A0A117E1B4	TdiA OS=Aspergillus niger OX=5061 GN=ABL_06449 PE=4 SV=1	0	2.379	1.08108	1	1	1	1	925	103.9	6.13	1.78	1
FALSE	High	Master Protein	A0A117E086	Xylanase D OS=Aspergillus niger OX=5061 GN=ABL_04846 PE=3 SV=1	0	2.378	4.58453	1	1	1	1	349	38.7	5.05	2.32	1
FALSE	High	Master Protein	A0A1L9NNC4	Uncharacterized protein OS=Aspergillus tubingensis CBS 134.48 OX=767770 GN=ASPTUDRAFT_113542 PE=4 SV=1	0	2.373	2.63819	2	2	2	1	796	87.3	5.1	4.57	2
FALSE	High	Master Protein	G7DRZ4	Cytochrome c oxidase subunit 1 (Fragment) OS=Aspergillus kawachii (strain NBRC 4308) OX=1033177 GN=cox1 PE=3 SV=1	0	2.359	1.92982	1	1	1	1	570	62.9	7.75	2.37	1
FALSE	High	Master Protein	A0A0F0IH70	Glycosyl hydrolase family 76 OS=Aspergillus parasiticus (strain ATCC 56775 / NRRL 5862 / SRRC 143 / SU-1) OX=1403190 GN=P875_00117406 PE=3 SV=1	0	2.352	1.13122	1	1	1	1	884	97.9	5.34	2.38	1
FALSE	High	Master Protein	A0A100IC32	Pectinesterase OS=Aspergillus niger OX=5061 GN=ABL_02685 PE=4 SV=1	0	2.34	3.0581	1	1	1	1	327	34.7	4.41	3.15	1
FALSE	High	Master Protein	A0A146F6D3	ATP-dependent 6-phosphofructokinase OS=Aspergillus luchuensis OX=1069201 GN=RIB2604_01001710 PE=3 SV=1	0	2.335	1.40485	1	1	1	1	783	85.7	7.31	0	1
FALSE	High	Master Protein	A0A146FXP1	Prohibitin OS=Aspergillus luchuensis OX=1069201 GN=RIB2604_03302000 PE=4 SV=1	0	2.331	4.24837	1	1	1	1	306	33.7	9.95	2.53	1
FALSE	High	Master Protein	A0A1L9MRD0	Uncharacterized protein OS=Aspergillus tubingensis CBS 134.48 OX=767770 GN=ASPTUDRAFT_887680 PE=3 SV=1	0	2.328	2.01207	1	1	1	1	497	54.5	5.85	2.57	1
FALSE	High	Master Protein	A0A1L9URT5	Uncharacterized protein OS=Aspergillus brasiliensis CBS 101740 OX=767769 GN=ASPBRDRAFT_39362 PE=4 SV=1	0	2.327	3.11615	1	1	1	1	353	39.6	5.69	0	1
FALSE	High	Master Protein	A0A0L1IR79	Uricase OS=Aspergillus nomius NRRL 13137 OX=1509407 GN=ANOM_009341 PE=3 SV=1	0	2.325	3.30033	1	1	1	1	303	34.3	7.65	2.04	1
FALSE	High	Master Protein	A0A1L9UTP6	Uncharacterized protein OS=Aspergillus brasiliensis CBS 101740 OX=767769 GN=ASPBRDRAFT_193750 PE=4 SV=1	0	2.324	3.6036	1	1	1	1	333	35.9	9.44	2.61	1
FALSE	High	Master Protein	A0A0F4Z2X2	40S ribosomal protein S30 OS=Rasamsonia emersonii CBS 393.64 OX=1408163 GN=T310_1090 PE=3 SV=1	0	2.314	6.84932	1	1	1	1	146	16.3	11.85	2.11	1
FALSE	High	Master Protein	A0A017SKI4	NADH-cytochrome b5 reductase OS=Aspergillus ruber CBS 135680 OX=1388766 GN=EURHEDRAFT_376116 PE=3 SV=1	0	2.303	4.22078	1	1	1	1	308	33.6	8.19	2.19	1
FALSE	High	Master Protein	A0A146F9L9	Fe-containing alcohol dehydrogenase OS=Aspergillus luchuensis OX=1069201 GN=RIB2604_01503260 PE=4 SV=1	0	2.303	1.9685	1	1	1	1	508	54.5	7.85	2.5	1
FALSE	High	Master Protein	A0A2K4ZYX9	Uncharacterized protein OS=Aspergillus niger OX=5061 GN=ATCC64974_26450 PE=3 SV=1	0	2.293	3.51351	1	2	1	1	370	40.5	5.44	4.2	1
FALSE	High	Master Protein	A0A100IRR2	Actin cortical patch component OS=Aspergillus niger OX=5061 GN=ABL_08798 PE=4 SV=1	0	2.266	0.466299	1	1	1	1	2359	260.1	6.98	2.06	1
FALSE	High	Master Protein	A0A0F4Z4R0	ATP synthase gamma chain OS=Rasamsonia emersonii CBS 393.64 OX=1408163 GN=T310_0946 PE=4 SV=1	0	2.261	2.5974	1	1	1	1	385	41.2	6.96	2.58	1
FALSE	High	Master Protein	A0A0F4Z4E8	ADP-ribosylation factor OS=Rasamsonia emersonii CBS 393.64 OX=1408163 GN=T310_1005 PE=3 SV=1	0	2.234	1.09649	1	1	1	1	912	103.2	7.18	2.87	1
FALSE	High	Master Protein	A0A1M3TUR3	Uncharacterized protein OS=Aspergillus luchuensis CBS 106.47 OX=1137211 GN=ASPFODRAFT_203137 PE=4 SV=1	0	2.214	2.53807	1	1	1	1	394	43.4	6.47	2.21	1
FALSE	High	Master Protein	A0A100IUG1	Ser/Thr protein phosphatase family OS=Aspergillus niger OX=5061 GN=ABL_09982 PE=4 SV=1	0	2.206	1.41287	1	1	1	1	637	72	5.5	1.89	1
FALSE	High	Master Protein	A0A100INW1	Aspartate-semialdehyde dehydrogenase OS=Aspergillus niger OX=5061 GN=ABL_07317 PE=4 SV=1	0	2.204	3.30579	1	1	1	1	363	39.2	6.8	2.18	1
FALSE	High	Master Protein	A2RB15	Aspergillus niger contig An18c0160, genomic contig OS=Aspergillus niger (strain CBS 513.88 / FGSC A1513) OX=425011 GN=An18g05130 PE=4 SV=1	0	2.202	3.80623	1	1	1	1	289	31.1	6.3	2.18	1
FALSE	High	Master Protein	A0A1S9DHG8	Uncharacterized protein OS=Aspergillus oryzae OX=5062 GN=OAory_01098190 PE=4 SV=1	0	2.188	1.88133	1	1	1	1	691	77.2	4.58	2.65	1
FALSE	High	Master Protein	A0A1M3TCG2	Uncharacterized protein OS=Aspergillus luchuensis CBS 106.47 OX=1137211 GN=ASPFODRAFT_72703 PE=4 SV=1	0	2.162	3.97112	1	2	1	1	277	30.5	7.84	4.03	1
FALSE	High	Master Protein	A0A229Y207	Uncharacterized protein OS=Neosartorya fumigata OX=746128 GN=CDV57_05800 PE=4 SV=1	0	2.156	1.82724	1	2	1	1	602	66.8	6.05	3.8	1
FALSE	High	Master Protein	A0A2V5ILV3	Acylphosphatase OS=Aspergillus indologenus CBS 114.80 OX=1450541 GN=BP00DRAFT_361399 PE=4 SV=1	0	2.146	7.97101	1	1	1	1	138	15.7	9.63	2.86	1
FALSE	High	Master Protein	A0A100ISB5	Membrane bound C2 domain protein vp115 OS=Aspergillus niger OX=5061 GN=ABL_09083 PE=4 SV=1	0	2.146	0.855263	1	1	1	1	1520	167.3	6.11	1.78	1
FALSE	High	Master Protein	A0A1L9NL91	Uncharacterized protein OS=Aspergillus tubingensis CBS 134.48 OX=767770 GN=ASPTUDRAFT_62163 PE=4 SV=1	0	2.136	1.54799	1	1	1	1	646	71.3	5.26	2.55	1
FALSE	High	Master Protein	A0A0S7E5P3	Uncharacterized protein OS=Aspergillus lentulus OX=293939 GN=ALT_8895 PE=4 SV=1	0	2.13	0.71048	1	1	1	1	1689	186.6	6.89	0	1
FALSE	High	Master Protein	A0A0S7E5E2	Protein sda1 OS=Aspergillus lentulus OX=293939 GN=ALT_7781 PE=3 SV=1	0	2.128	0.922131	1	1	1	1	976	109.9	9.11	2.37	1
FALSE	High	Master Protein	A0A146FXP4	Extracelular serine carboxypeptidase OS=Aspergillus luchuensis OX=1069201 GN=RIB2604_03300900 PE=4 SV=1	0	2.102	2.46046	1	2	1	1	569	62.9	5.15	0	1
FALSE	High	Master Protein	A2QI29	Clathrin heavy chain OS=Aspergillus niger (strain CBS 513.88 / FGSC A1513) OX=425011 GN=An04g02070 PE=3 SV=1	0	2.098	0.75979	1	1	1	1	1711	194.5	5.33	2.37	1
FALSE	High	Master Protein	A0A146FVI8	GPI anchored protein OS=Aspergillus luchuensis OX=1069201 GN=RIB2604_02902290 PE=4 SV=1	0	2.096	2.73224	1	1	1	1	366	40.1	5.44	3.13	1
FALSE	High	Master Protein	A0A146FBS9	Uncharacterized protein OS=Aspergillus luchuensis OX=1069201 GN=RIB2604_01704940 PE=4 SV=1	0	2.095	2.52101	1	2	1	1	476	48.2	4.3	4.35	1
FALSE	High	Master Protein	A0A100ILV4	C6 finger domain protein OS=Aspergillus niger OX=5061 GN=ABL_06240 PE=4 SV=1	0	2.084	1.2945	1	1	1	1	1236	137.8	8.03	2.07	1
FALSE	High	Master Protein	A0A1L9NM86	Uncharacterized protein OS=Aspergillus tubingensis CBS 134.48 OX=767770 GN=ASPTUDRAFT_113093 PE=4 SV=1	0	2.077	6.59898	1	1	1	1	197	22.3	5.99	1.9	1
FALSE	High	Master Protein	A0A1L9NNI0	Uncharacterized protein OS=Aspergillus tubingensis CBS 134.48 OX=767770 GN=ASPTUDRAFT_186512 PE=4 SV=1	0	2.071	14.1026	1	2	1	1	78	8.3	5.17	5.3	1
FALSE	High	Master Protein	A0A0F4YV04	E3 ubiquitin ligase complex SCF subunit sconC OS=Rasamsonia emersonii CBS 393.64 OX=1408163 GN=T310_4099 PE=3 SV=1	0	2.069	4.01606	1	1	1	1	249	28.3	4.73	2.17	1
FALSE	High	Master Protein	G7XFT8	Sorting nexin GRD19 OS=Aspergillus kawachii (strain NBRC 4308) OX=1033177 GN=AKAW_03910 PE=4 SV=1	0	2.057	9.15493	1	1	1	1	142	16.7	8.19	1.88	1
FALSE	High	Master Protein	A0A0L1IX98	Proteasome subunit beta type OS=Aspergillus nomius NRRL 13137 OX=1509407 GN=ANOM_007161 PE=3 SV=1	0	2.056	3.50877	1	1	1	1	285	31.1	6.54	2.16	1
FALSE	High	Master Protein	A0A146FIB7	L-aminoadipate-semialdehyde dehydrogenase large subunit OS=Aspergillus luchuensis OX=1069201 GN=RIB2604_02005040 PE=4 SV=1	0	2.055	1.04895	1	1	1	1	1430	157.2	5.64	1.61	1
FALSE	High	Master Protein	A0A2I2G2C8	Putative Xaa-Pro aminopeptidase pepP OS=Aspergillus steynii IBT 23096 OX=1392250 GN=P170DRAFT_428258 PE=3 SV=1	0	2.051	2.36052	1	1	1	1	466	51.8	5.72	1.7	1
FALSE	High	Master Protein	A0A0K8L7B0	Transcriptional activator OS=Aspergillus udagawae OX=91492 GN=AUD_2917 PE=3 SV=1	0	2.051	3.65854	1	1	1	1	328	36.2	7.08	2.21	1
FALSE	High	Master Protein	A0A1L9X6B6	Hydrophobin OS=Aspergillus aculeatus ATCC 16872 OX=690307 GN=ASPACDRAFT_57358 PE=3 SV=1	0	2.037	7.5	1	2	1	1	160	16.4	4.46	0	1
FALSE	High	Master Protein	A0A100IHW9	Pyridoxal reductase OS=Aspergillus niger OX=5061 GN=ABL_04214 PE=4 SV=1	0	2.035	4.04984	1	1	1	1	321	35.1	6.27	2.34	1
FALSE	High	Master Protein	Q5ASY6	Uncharacterized protein OS=Emericella nidulans (strain FGSC A4 / ATCC 38163 / CBS 112.46 / NRRL 194 / M139) OX=227321 GN=AN8594.2 PE=4 SV=1	0	2.025	1.16279	1	1	1	1	774	86.4	6.54	2.12	1
FALSE	High	Master Protein	A0A2V5HPV3	CLN3-domain-containing protein OS=Aspergillus violaceofuscus CBS 115571 OX=1450538 GN=BO99DRAFT_418260 PE=4 SV=1	0	2.021	0.933416	1	1	1	1	1607	176.5	8.41	1.98	1
FALSE	High	Master Protein	A0A1L9UV15	Ubiquitin carboxyl-terminal hydrolase OS=Aspergillus brasiliensis CBS 101740 OX=767769 GN=ASPBRDRAFT_191639 PE=3 SV=1	0	2.019	1.28205	1	1	1	1	780	86.8	5.27	0	1
FALSE	High	Master Protein	A0A117E121	Eukaryotic translation initiation factor subunit eIF-4F OS=Aspergillus niger OX=5061 GN=ABL_06059 PE=4 SV=1	0	2.018	0.534442	1	1	1	1	1684	180.1	9.51	2.23	1
FALSE	High	Master Protein	A0A146F2C3	Ketoreductase OS=Aspergillus luchuensis OX=1069201 GN=RIB2604_00609030 PE=4 SV=1	0	2.013	3.77358	1	1	1	1	318	35.4	7.78	2.55	1
FALSE	High	Master Protein	A0A100I8Y2	Cytochrome P450 OS=Aspergillus niger OX=5061 GN=ABL_01895 PE=3 SV=1	0	2.011	2.35546	1	1	1	1	467	51.9	7.66	2.71	1
FALSE	High	Master Protein	A2Q8P0	Aspergillus niger contig An01c0170, genomic contig OS=Aspergillus niger (strain CBS 513.88 / FGSC A1513) OX=425011 GN=An01g05030 PE=4 SV=1	0	2.007	2.29592	1	1	1	1	392	44.2	8.12	2.19	1
FALSE	High	Master Protein	A0A117DYJ3	Carbonyl reductase OS=Aspergillus niger OX=5061 GN=ABL_03213 PE=4 SV=1	0	2.004	3.07167	1	1	1	1	293	31.1	6.05	2.61	1
FALSE	High	Master Protein	A0A1M3SYT4	Uncharacterized protein OS=Aspergillus luchuensis CBS 106.47 OX=1137211 GN=ASPFODRAFT_213183 PE=4 SV=1	0	2.004	1.91571	1	1	1	1	522	59.1	7.17	2.59	1
FALSE	High	Master Protein	A2R522	Aspergillus niger contig An15c0110, genomic contig OS=Aspergillus niger (strain CBS 513.88 / FGSC A1513) OX=425011 GN=An15g02410 PE=4 SV=1	0	2.003	3.04709	1	1	1	1	361	39.6	6.8	2.3	1
FALSE	High	Master Protein	A0A146F5N1	Survival factor 1 OS=Aspergillus luchuensis OX=1069201 GN=RIB2604_01002870 PE=4 SV=1	0	1.998	2.8777	1	1	1	1	417	46.3	5.49	2.64	1
FALSE	High	Master Protein	A0A1L9P3L5	Uncharacterized protein OS=Aspergillus versicolor CBS 583.65 OX=1036611 GN=ASPVEDRAFT_122758 PE=3 SV=1	0	1.988	2.67261	1	1	1	1	449	48.7	6.64	1.95	1
FALSE	High	Master Protein	A0A100IUC2	Purple acid phosphatase OS=Aspergillus niger OX=5061 GN=ABL_10080 PE=3 SV=1	0	1.98	2.40964	1	1	1	1	498	54.6	4.69	2.5	1
FALSE	High	Master Protein	A0A0F4Z5T6	Galactose-1-phosphate uridylyltransferase OS=Rasamsonia emersonii CBS 393.64 OX=1408163 GN=T310_0075 PE=3 SV=1	0	1.978	3.01508	1	1	1	1	398	45.5	6.6	2.19	1
FALSE	High	Master Protein	A0A2I1CYS3	GMP synthase OS=Aspergillus campestris IBT 28561 OX=1392248 GN=P168DRAFT_291906 PE=3 SV=1	0	1.977	2.03704	1	1	1	1	540	59.7	6.49	3.34	1
FALSE	High	Master Protein	A0A1L9UIH7	Peptidyl-prolyl cis-trans isomerase OS=Aspergillus brasiliensis CBS 101740 OX=767769 GN=ASPBRDRAFT_126073 PE=3 SV=1	0	1.969	4.97238	1	1	1	1	181	20	6.67	0	1
FALSE	High	Master Protein	A0A1R3RNJ9	Carboxypeptidase OS=Aspergillus carbonarius (strain ITEM 5010) OX=602072 GN=ASPCADRAFT_207386 PE=3 SV=1	0	1.962	1.92982	1	1	1	1	570	63.8	4.87	2.33	1
FALSE	High	Master Protein	A0A254U1I4	Alpha/beta hydrolase fold family protein OS=Aspergillus niger OX=5061 GN=CAN33_18550 PE=4 SV=1	0	1.955	2.95699	1	1	1	1	372	41.1	5.6	2.2	1
FALSE	High	Master Protein	A0A2I1D4V1	Serine/threonine-protein phosphatase OS=Aspergillus campestris IBT 28561 OX=1392248 GN=P168DRAFT_141086 PE=3 SV=1	0	1.946	2.33236	1	1	1	1	343	39.4	5.99	2.4	1
FALSE	High	Master Protein	A0A0K8LH28	Cyanide hydratase OS=Aspergillus udagawae OX=91492 GN=AUD_6591 PE=2 SV=1	0	1.94	0.715215	1	1	1	1	1538	172.5	6.21	2.07	1
FALSE	High	Master Protein	A0A0F0IEB8	Uncharacterized protein OS=Aspergillus parasiticus (strain ATCC 56775 / NRRL 5862 / SRRC 143 / SU-1) OX=1403190 GN=P875_00021740 PE=3 SV=1	0	1.936	0.437637	1	1	1	1	2285	259.2	5.62	2.12	1
FALSE	High	Master Protein	A0A0F8V5Z3	NADH-ubiquinone oxidoreductase subunit OS=Aspergillus rambellii OX=308745 GN=ARAM_003702 PE=4 SV=1	0	1.892	4.56853	1	1	1	1	197	21.8	9.13	2.29	1
FALSE	High	Master Protein	B0XZ98	Histone H2A OS=Neosartorya fumigata (strain CEA10 / CBS 144.89 / FGSC A1163) OX=451804 GN=AFUB_043640 PE=3 SV=1	0	1.892	3.39623	1	1	1	1	265	29.8	10.15	2.67	1
FALSE	High	Master Protein	A0A1L9NK28	Uncharacterized protein OS=Aspergillus tubingensis CBS 134.48 OX=767770 GN=ASPTUDRAFT_34503 PE=4 SV=1	0	1.883	1.2837	1	1	1	1	779	85	5.02	2.34	1
FALSE	High	Master Protein	A0A017RZL1	V-type proton ATPase subunit OS=Aspergillus ruber CBS 135680 OX=1388766 GN=EURHEDRAFT_417637 PE=3 SV=1	0	1.883	2.35602	1	1	1	1	382	43.3	4.96	1.74	1
FALSE	High	Master Protein	A0A1M3TXK4	Uncharacterized protein OS=Aspergillus luchuensis CBS 106.47 OX=1137211 GN=ASPFODRAFT_41930 PE=3 SV=1	0	1.882	16.1616	1	1	1	1	99	11.3	9.82	1.88	1
FALSE	High	Master Protein	A0A1L9NL90	Uncharacterized protein OS=Aspergillus tubingensis CBS 134.48 OX=767770 GN=ASPTUDRAFT_51912 PE=4 SV=1	0	1.88	2.36967	1	1	1	1	422	47	8.56	2.06	1
FALSE	High	Master Protein	A0A100IAP7	2-hydroxyhepta-2,4-diene-1,7-dioate isomerase OS=Aspergillus niger OX=5061 GN=ABL_02321 PE=4 SV=1	0	1.878	2.39234	1	1	1	1	418	46.3	5.41	2.36	1
FALSE	High	Master Protein	G7XMU8	Uncharacterized protein OS=Aspergillus kawachii (strain NBRC 4308) OX=1033177 GN=AKAW_06496 PE=4 SV=1	0	1.868	0.984252	1	1	1	1	1016	113.2	8.5	1.62	1
FALSE	High	Master Protein	A0A1L9UZB2	Uncharacterized protein OS=Aspergillus brasiliensis CBS 101740 OX=767769 GN=ASPBRDRAFT_112915 PE=4 SV=1	0	1.862	4.33333	1	1	1	1	300	31.1	4.12	1.82	1
FALSE	High	Master Protein	G3XZZ8	Uncharacterized protein OS=Aspergillus niger (strain ATCC 1015 / CBS 113.46 / FGSC A1144 / LSHB Ac4 / NCTC 3858a / NRRL 328 / USDA 3528.7) OX=380704 GN=ASPNIDRAFT_53357 PE=3 SV=1	0	1.852	2.33918	1	1	1	1	513	55.8	6.4	2.19	1
FALSE	High	Master Protein	A2Q9U4	Aspergillus niger contig An01c0310, genomic contig OS=Aspergillus niger (strain CBS 513.88 / FGSC A1513) OX=425011 GN=An01g09120 PE=4 SV=1	0	1.842	2.32558	1	1	1	1	473	54.6	8.82	0	1
FALSE	High	Master Protein	A0A100ISI7	Cytochrome P450 OS=Aspergillus niger OX=5061 GN=ABL_08977 PE=3 SV=1	0	1.832	2.04082	1	1	1	1	539	61.1	7.53	2.18	1
FALSE	High	Master Protein	A0A254UBX0	Uncharacterized protein OS=Aspergillus niger OX=5061 GN=ATCC64974_49640 PE=4 SV=1	0	1.832	2.34375	1	1	1	1	640	66.7	9.57	2.13	1
FALSE	High	Master Protein	A0A100IR96	Short chain dehydrogenase OS=Aspergillus niger OX=5061 GN=ABL_08376 PE=4 SV=1	0	1.83	2.65252	1	1	1	1	377	40.8	7.27	2.21	1
FALSE	High	Master Protein	A0A2N1VSL6	Uncharacterized protein (Fragment) OS=Ignavibacteriae bacterium HGW-Ignavibacteriae-2 OX=2013809 GN=CVV23_15480 PE=4 SV=1	0	1.829	3.71747	1	2	1	1	269	31.2	6	5.37	1
FALSE	High	Master Protein	A0A1M3T7E6	Uncharacterized protein OS=Aspergillus luchuensis CBS 106.47 OX=1137211 GN=ASPFODRAFT_50499 PE=4 SV=1	0	1.827	4.4335	1	1	1	1	203	21.4	5.52	3.18	1
FALSE	High	Master Protein	A0A0K8L9C1	Cysteine desulfurase, mitochondrial OS=Aspergillus udagawae OX=91492 GN=AUD_3885 PE=3 SV=1	0	1.824	2.70793	1	1	1	1	517	56.5	8.32	1.68	1
FALSE	High	Master Protein	A0A0S7DTK5	Eukaryotic translation initiation factor 3 subunit G OS=Aspergillus lentulus OX=293939 GN=TIF35 PE=3 SV=1	0	1.819	1.10375	1	1	1	1	906	99.1	8.15	2.23	1
FALSE	High	Master Protein	A0A1E3B043	Uncharacterized protein OS=Aspergillus cristatus OX=573508 GN=SI65_10289 PE=4 SV=1	0	1.819	3.7123	1	1	1	1	431	47.7	7.17	2.04	1
FALSE	High	Master Protein	B0YD08	1,2-dihydroxy-3-keto-5-methylthiopentene dioxygenase OS=Neosartorya fumigata (strain CEA10 / CBS 144.89 / FGSC A1163) OX=451804 GN=ADI1 PE=3 SV=1	0	1.813	5.26316	1	1	1	1	228	26.3	6.24	0	1
FALSE	High	Master Protein	A0A100IL58	Haloacid dehalogenase-like hydrolase OS=Aspergillus niger OX=5061 GN=ABL_05906 PE=4 SV=1	0	1.811	3.75	1	1	1	1	240	26.6	5.34	0	1
FALSE	High	Master Protein	A0A146FUJ0	Arp2/3 complex subunit OS=Aspergillus luchuensis OX=1069201 GN=RIB2604_02602130 PE=3 SV=1	0	1.806	2.65487	1	1	1	1	452	50.8	6.64	1.85	1
FALSE	High	Master Protein	A0A146G2B0	FAD binding domain protein OS=Aspergillus luchuensis OX=1069201 GN=RIB2604_03800350 PE=4 SV=1	0	1.802	1.26404	1	1	1	1	712	80.6	5.97	2.83	1
FALSE	High	Master Protein	A0A254TT12	Uncharacterized protein OS=Aspergillus niger OX=5061 GN=CAN33_55215 PE=4 SV=1	0	1.795	3.01003	1	1	1	1	299	33.5	5.38	1.67	1
FALSE	High	Master Protein	A0A146EXR4	Phospholipase OS=Aspergillus luchuensis OX=1069201 GN=RIB2604_00102770 PE=4 SV=1	0	1.793	3.33333	1	1	1	1	270	30.3	7.2	2.23	1
FALSE	High	Master Protein	A5AA65	Aspergillus niger contig An02c0200, genomic contig OS=Aspergillus niger (strain CBS 513.88 / FGSC A1513) OX=425011 GN=An02g06720 PE=4 SV=1	0	1.785	1.1236	1	1	1	1	890	99.5	5.67	0	1
FALSE	High	Master Protein	A0A117E2S6	Similar to An02g14040 OS=Aspergillus niger OX=5061 GN=ABL_08759 PE=4 SV=1	0	1.782	10.1124	1	1	1	1	89	9.3	3.98	2.57	1
FALSE	High	Master Protein	A0A1S9DTC0	Cell division/GTP binding protein OS=Aspergillus oryzae OX=5062 GN=OAory_01000100 PE=3 SV=1	0	1.78	3.58127	1	1	1	1	363	41.2	7.97	1.88	1
FALSE	High	Master Protein	A0A1L9UJM4	Uncharacterized protein OS=Aspergillus brasiliensis CBS 101740 OX=767769 GN=ASPBRDRAFT_152459 PE=4 SV=1	0	1.771	4.45344	1	1	1	1	247	26.3	6.23	2.3	1
FALSE	High	Master Protein	A0A1L9V645	Alpha-glucuronidase OS=Aspergillus glaucus CBS 516.65 OX=1160497 GN=aguA PE=3 SV=1	0	1.77	1.06635	1	1	1	1	844	94	4.83	1.86	1
FALSE	High	Master Protein	A0A117E2W0	Quinone oxidoreductase OS=Aspergillus niger OX=5061 GN=ABL_08821 PE=4 SV=1	0	1.767	3.27381	1	1	1	1	336	36.3	6.18	2.14	1
FALSE	High	Master Protein	A0A1G7JQS0	Metal-dependent hydrolase, endonuclease/exonuclease/phosphatase family OS=Chitinophaga filiformis OX=104663 GN=SAMN04488121_1011339 PE=4 SV=1	0	1.763	2.69542	1	1	1	1	371	43	9.45	2.1	1
FALSE	High	Master Protein	A0A100IN30	Porphobilinogen deaminase OS=Aspergillus niger OX=5061 GN=ABL_06912 PE=4 SV=1	0	1.755	2.99401	1	1	1	1	334	36.3	6.71	2.59	1
FALSE	High	Master Protein	A0A146F8Z3	Calcium sensor OS=Aspergillus luchuensis OX=1069201 GN=RIB2604_01601490 PE=4 SV=1	0	1.75	4.66102	1	1	1	1	236	27	5.12	1.89	1
FALSE	High	Master Protein	A0A146FQH1	Class III chitinase OS=Aspergillus luchuensis OX=1069201 GN=RIB2604_02301030 PE=3 SV=1	0	1.75	2.38727	1	1	1	1	377	40.5	6.02	2.47	1
FALSE	High	Master Protein	A0A1L9MUP2	Uncharacterized protein OS=Aspergillus tubingensis CBS 134.48 OX=767770 GN=ASPTUDRAFT_179468 PE=3 SV=1	0	1.744	2.74841	1	1	1	1	473	50	5.96	1.8	1
FALSE	High	Master Protein	A0A0L1IM61	1,3-beta-glucanosyltransferase OS=Aspergillus nomius NRRL 13137 OX=1509407 GN=ANOM_011618 PE=3 SV=1	0	1.738	0.833333	1	1	1	1	1080	119.5	4.97	1.75	1
FALSE	High	Master Protein	A0A146F4R8	Amine oxidase OS=Aspergillus luchuensis OX=1069201 GN=RIB2604_00801520 PE=3 SV=1	0	1.737	1.78042	1	1	1	1	674	75.7	6.32	1.97	1
FALSE	High	Master Protein	A0A2I1DBX0	Threonyl-tRNA synthetase OS=Aspergillus campestris IBT 28561 OX=1392248 GN=P168DRAFT_324805 PE=3 SV=1	0	1.732	1.20321	1	1	1	1	748	86.1	7.24	2.18	1
FALSE	High	Master Protein	A0A254UFM6	Tubulin alpha chain OS=Aspergillus niger OX=5061 GN=CAN33_31065 PE=3 SV=1	0	1.725	2.29645	1	1	1	1	479	53.5	5.38	1.86	1
FALSE	High	Master Protein	A0A1L9N0J7	Uncharacterized protein OS=Aspergillus tubingensis CBS 134.48 OX=767770 GN=ASPTUDRAFT_173345 PE=4 SV=1	0	1.721	2.77778	1	1	1	1	360	40.3	5.97	2.24	1
FALSE	High	Master Protein	A0A100IAQ2	Flavin-binding monooxygenase-like protein OS=Aspergillus niger OX=5061 GN=ABL_02328 PE=4 SV=1	0.001	1.71	2.11382	1	1	1	1	615	68.6	6.09	2.24	1
FALSE	High	Master Protein	A0A229XAV0	Uncharacterized protein OS=Aspergillus turcosus OX=1245748 GN=CFD26_04037 PE=4 SV=1	0.001	1.699	5.82011	1	1	1	1	189	20.8	9.77	2.12	1
FALSE	High	Master Protein	A0A0C1E375	Uncharacterized protein OS=Aspergillus ustus OX=40382 GN=HK57_00164 PE=4 SV=1	0.001	1.687	2.02578	1	1	1	1	543	57.9	4.58	2.27	1
FALSE	High	Master Protein	A0A017SIT9	Putative alcohol dehydrogenase OS=Aspergillus ruber CBS 135680 OX=1388766 GN=EURHEDRAFT_452359 PE=3 SV=1	0.001	1.685	2.71084	1	1	1	1	332	36.1	7.05	2.54	1
FALSE	High	Master Protein	A0A1L9PU10	Aspartate aminotransferase OS=Aspergillus versicolor CBS 583.65 OX=1036611 GN=ASPVEDRAFT_55048 PE=4 SV=1	0.001	1.681	2.39234	1	1	1	1	418	46.5	7.44	2.53	1
FALSE	High	Master Protein	A0A1L9SPG0	Uncharacterized protein OS=Penicilliopsis zonata CBS 506.65 OX=1073090 GN=ASPZODRAFT_61172 PE=4 SV=1	0.001	1.673	1.43084	1	1	1	1	629	70	6.37	1.88	1
FALSE	High	Master Protein	A2QGK6	Aspergillus niger contig An03c0120, genomic contig OS=Aspergillus niger (strain CBS 513.88 / FGSC A1513) OX=425011 GN=An03g03640 PE=4 SV=1	0.001	1.666	3.22581	1	1	1	1	527	58.1	9.36	2.08	1
FALSE	High	Master Protein	A0A146FF41	1,3-beta-glucanosyltransferase OS=Aspergillus luchuensis OX=1069201 GN=RIB2604_01800470 PE=3 SV=1	0.001	1.666	1.90476	1	1	1	1	525	55.8	4.74	2.25	1
FALSE	High	Master Protein	A0A100IQV3	Uncharacterized protein OS=Aspergillus niger OX=5061 GN=ABL_08360 PE=4 SV=1	0.001	1.665	6.38298	1	1	1	1	141	15	5.57	2.49	1
FALSE	High	Master Protein	A0A0F8U4A1	Chitin synthase B OS=Aspergillus rambellii OX=308745 GN=ARAM_000072 PE=3 SV=1	0.001	1.665	1.22549	1	1	1	1	1224	136.1	8.19	0	1
FALSE	High	Master Protein	G3YGS2	Uncharacterized protein OS=Aspergillus niger (strain ATCC 1015 / CBS 113.46 / FGSC A1144 / LSHB Ac4 / NCTC 3858a / NRRL 328 / USDA 3528.7) OX=380704 GN=ASPNIDRAFT_198713 PE=4 SV=1	0.001	1.665	0.945455	1	1	1	1	1375	151.5	7.39	0	1
FALSE	High	Master Protein	A0A0F4Z714	Importin subunit alpha OS=Rasamsonia emersonii CBS 393.64 OX=1408163 GN=T310_0288 PE=4 SV=1	0.001	1.657	1.67428	1	1	1	1	657	71.9	5.52	1.79	1
FALSE	High	Master Protein	A0A117E1P0	Uncharacterized protein OS=Aspergillus niger OX=5061 GN=ABL_06994 PE=4 SV=1	0.001	1.657	2.52918	1	1	1	1	514	54.5	5	0	1
FALSE	High	Master Protein	A0A100I6I8	CTP synthase OS=Aspergillus niger OX=5061 GN=ABL_01247 PE=3 SV=1	0.001	1.657	2.07254	1	1	1	1	579	63.9	6.8	2.06	1
FALSE	High	Master Protein	A0A1L9R6Q8	Uncharacterized protein OS=Aspergillus wentii DTO 134E9 OX=1073089 GN=ASPWEDRAFT_177249 PE=4 SV=1	0.001	1.657	5.05415	1	1	1	1	277	29.7	6.93	0	1
FALSE	High	Master Protein	A0A254TVG2	Defective in cullin neddylation protein OS=Aspergillus niger OX=5061 GN=ATCC64974_86020 PE=4 SV=1	0.001	1.653	3.33333	1	2	1	1	270	30.8	5.07	3.96	1
FALSE	High	Master Protein	A0A1M3T3Q9	Carbohydrate-binding module family 35 protein OS=Aspergillus luchuensis CBS 106.47 OX=1137211 GN=ASPFODRAFT_199512 PE=3 SV=1	0.001	1.646	2.00445	1	2	1	1	449	48.7	4.35	3.87	1
FALSE	High	Master Protein	A0A100IIX4	Cell wall glucanase OS=Aspergillus niger OX=5061 GN=ABL_04725 PE=4 SV=1	0.001	1.645	2.73224	1	1	1	1	366	38.9	4.59	1.91	1
FALSE	High	Master Protein	A0A1L9UZC8	Uncharacterized protein OS=Aspergillus brasiliensis CBS 101740 OX=767769 GN=ASPBRDRAFT_36221 PE=4 SV=1	0.001	1.634	3.26087	1	2	1	1	368	41.8	6.24	5.02	1
FALSE	High	Master Protein	A0A0F0I3C6	12-HQD like protein OS=Aspergillus parasiticus (strain ATCC 56775 / NRRL 5862 / SRRC 143 / SU-1) OX=1403190 GN=P875_00042655 PE=4 SV=1	0.001	1.634	4.09357	1	1	1	1	342	38.5	5.74	0	1
FALSE	High	Master Protein	A0A0F4YP09	RNA binding effector protein Scp160 OS=Rasamsonia emersonii CBS 393.64 OX=1408163 GN=T310_6426 PE=4 SV=1	0.001	1.628	0.82769	1	1	1	1	1329	143.6	7.55	2.12	1
FALSE	High	Master Protein	A0A146FRP5	Endoglucanase OS=Aspergillus luchuensis OX=1069201 GN=RIB2604_02301700 PE=4 SV=1	0.001	1.622	2.92683	1	1	1	1	410	41.5	6.29	0	1
FALSE	High	Master Protein	A0A124BZ37	60S ribosomal protein L33 OS=Aspergillus niger OX=5061 GN=ABL_10157 PE=3 SV=1	0.001	1.622	5.52486	1	1	1	1	181	20	10.3	2.52	1
FALSE	High	Master Protein	A0A146FXA0	Metallo-beta-lactamase superfamily protein OS=Aspergillus luchuensis OX=1069201 GN=RIB2604_03102630 PE=4 SV=1	0.001	1.604	1.47059	1	1	1	1	680	76.5	5.91	0	1
FALSE	High	Master Protein	A0A100IRW8	XPG I-region protein OS=Aspergillus niger OX=5061 GN=ABL_08874 PE=4 SV=1	0.001	1.604	1.65975	1	1	1	1	723	81.3	5.74	2.01	1
FALSE	High	Master Protein	A0A2G7GBZ2	Ornithine aminotransferase OS=Aspergillus arachidicola OX=656916 GN=AARAC_007991 PE=3 SV=1	0.001	1.599	1.8595	1	1	1	1	484	52.2	6.43	1.93	1
FALSE	High	Master Protein	A0A146FZG5	Hydroxybutyrate dehydrogenase OS=Aspergillus luchuensis OX=1069201 GN=RIB2604_03700530 PE=3 SV=1	0.001	1.599	3.66492	1	1	1	1	382	41.6	7.05	1.85	1
FALSE	High	Master Protein	G3XN19	Phosphomevalonate kinase OS=Aspergillus niger (strain ATCC 1015 / CBS 113.46 / FGSC A1144 / LSHB Ac4 / NCTC 3858a / NRRL 328 / USDA 3528.7) OX=380704 GN=ASPNIDRAFT_211137 PE=3 SV=1	0.001	1.597	2.55864	1	1	1	1	469	51.1	5.11	2.48	1
FALSE	High	Master Protein	A0A1M3TNE7	Uncharacterized protein OS=Aspergillus luchuensis CBS 106.47 OX=1137211 GN=ASPFODRAFT_158332 PE=4 SV=1	0.001	1.595	3.5533	1	1	1	1	394	42.1	4.7	1.63	1
FALSE	High	Master Protein	A0A0S7DUK4	Superoxide dismutase [Mn], mitochondrial OS=Aspergillus lentulus OX=293939 GN=ALT_5612 PE=4 SV=1	0.001	1.595	1.21786	1	1	1	1	739	82.6	9.1	0	1
FALSE	High	Master Protein	A0A0F8VDU7	Uncharacterized protein OS=Aspergillus ochraceoroseus OX=138278 GN=AOCH_001879 PE=4 SV=1	0.001	1.588	0.458015	1	1	1	1	1965	220.7	5.41	1.85	1
FALSE	High	Master Protein	A0A117DYD9	Uncharacterized protein OS=Aspergillus niger OX=5061 GN=ABL_03073 PE=4 SV=1	0.001	1.584	1.67224	1	1	1	1	598	56.4	4.79	2.55	1
FALSE	High	Master Protein	A0A2I2FSX8	Cu,Zn superoxide dismutase-like protein OS=Aspergillus steynii IBT 23096 OX=1392250 GN=P170DRAFT_480692 PE=4 SV=1	0.001	1.583	6.04651	1	1	1	1	215	23.6	4.56	1.62	1
FALSE	High	Master Protein	A0A0S7DZJ9	60S ribosomal protein L36 OS=Aspergillus lentulus OX=293939 GN=ALT_5226 PE=3 SV=1	0.001	1.577	0.621977	1	1	1	1	1447	163.4	9.09	2.91	1
FALSE	High	Master Protein	A0A146G101	Peptide-N4-(N-acetyl-beta-D-glucosaminyl) asparaginase amidase N OS=Aspergillus luchuensis OX=1069201 GN=RIB2604_04300350 PE=4 SV=1	0.001	1.576	1.90641	1	1	1	1	577	63.2	4.44	2.93	1
FALSE	High	Master Protein	A1DL55	Arp2/3 complex 20 kD subunit OS=Neosartorya fischeri (strain ATCC 1020 / DSM 3700 / CBS 544.65 / FGSC A1164 / JCM 1740 / NRRL 181 / WB 181) OX=331117 GN=NFIA_048630 PE=4 SV=1	0.001	1.568	2.91971	1	1	1	1	274	31.2	7.23	1.66	1
FALSE	High	Master Protein	A0A2G7FSR3	Eukaryotic translation initiation factor eIF-1 OS=Aspergillus arachidicola OX=656916 GN=AARAC_005752 PE=4 SV=1	0.001	1.565	2.59067	1	1	1	1	386	42.8	8.47	2.04	1
FALSE	High	Master Protein	A0A1L9UHC8	Uncharacterized protein OS=Aspergillus brasiliensis CBS 101740 OX=767769 GN=ASPBRDRAFT_154052 PE=4 SV=1	0.001	1.558	6.15385	1	1	1	1	195	21.5	5.64	0	1
FALSE	High	Master Protein	G7X4W0	Similar to An02g06220 OS=Aspergillus kawachii (strain NBRC 4308) OX=1033177 GN=AKAW_00247 PE=4 SV=1	0.001	1.553	2.21753	1	1	1	1	947	102.6	5.73	0	1
FALSE	High	Master Protein	A0A229YS12	Uncharacterized protein OS=Aspergillus turcosus OX=1245748 GN=CDV55_05621 PE=3 SV=1	0.001	1.541	3.10078	1	1	1	1	258	29.4	10.26	2.17	1
FALSE	High	Master Protein	A0A1M3TB86	Phosphoacetylglucosamine mutase OS=Aspergillus luchuensis CBS 106.47 OX=1137211 GN=ASPFODRAFT_209719 PE=3 SV=1	0.001	1.539	1.87713	1	1	1	1	586	63.7	5.85	2.66	1
FALSE	High	Master Protein	A0A100I540	Enoyl-CoA hydratase/isomerase family protein OS=Aspergillus niger OX=5061 GN=ABL_00954 PE=3 SV=1	0.001	1.537	3.40136	1	1	1	1	294	31.3	8.38	2.88	1
FALSE	High	Master Protein	A0A117E3I4	Unnamed protein product OS=Aspergillus niger OX=5061 GN=ABL_09839 PE=4 SV=1	0.001	1.533	1.2016	1	1	1	1	749	84.9	6.93	2.15	1
FALSE	High	Master Protein	A0A1L9N9W6	Uncharacterized protein OS=Aspergillus tubingensis CBS 134.48 OX=767770 GN=ASPTUDRAFT_187512 PE=4 SV=1	0.001	1.532	0.943396	1	1	1	1	1272	136.6	6.32	2.21	1
FALSE	High	Master Protein	A0A146FV03	Glucose-methanol-choline oxidoreductase OS=Aspergillus luchuensis OX=1069201 GN=RIB2604_03001120 PE=4 SV=1	0.001	1.531	1.63132	1	1	1	1	613	66.1	5.87	2.23	1
FALSE	High	Master Protein	A0A0L1JF17	Uncharacterized protein OS=Aspergillus nomius NRRL 13137 OX=1509407 GN=ANOM_001830 PE=4 SV=1	0.001	1.529	2.21328	1	1	1	1	497	56.4	9	0	1
FALSE	High	Master Protein	A1CNK4	Probable alpha/beta-glucosidase agdC OS=Aspergillus clavatus (strain ATCC 1007 / CBS 513.65 / DSM 816 / NCTC 3887 / NRRL 1) OX=344612 GN=agdC PE=3 SV=1	0.001	1.529	1.1274	1	1	1	1	887	99.8	6.58	0	1
FALSE	High	Master Protein	A0A146FU06	Similar to An16g07440 OS=Aspergillus luchuensis OX=1069201 GN=RIB2604_02700410 PE=4 SV=1	0.001	1.526	2.6	1	1	1	1	500	56	6.55	1.95	1
FALSE	High	Master Protein	A0A2I2GIM3	SH3-domain-containing protein OS=Aspergillus steynii IBT 23096 OX=1392250 GN=P170DRAFT_434443 PE=4 SV=1	0.001	1.509	3.32103	1	1	1	1	271	28.9	8.35	2.13	1
FALSE	High	Master Protein	A0A1L9WV69	Arabinan endo-1,5-alpha-L-arabinosidase OS=Aspergillus aculeatus ATCC 16872 OX=690307 GN=ASPACDRAFT_78084 PE=3 SV=1	0.001	1.5	2.82132	1	1	1	1	319	34	5.87	2.53	1
FALSE	High	Master Protein	A2QMR1	Uncharacterized protein OS=Aspergillus niger (strain CBS 513.88 / FGSC A1513) OX=425011 GN=An07g03005 PE=4 SV=1	0.001	1.5	10.6667	1	1	1	1	150	16.6	10.7	0	1
FALSE	High	Master Protein	A0A2G7G5U4	Phosphoribosyl-aminoimidazole-succinocarboxamide synthase OS=Aspergillus arachidicola OX=656916 GN=AARAC_010697 PE=3 SV=1	0.001	1.496	1.22951	1	1	1	1	732	81.5	6.35	1.83	1
FALSE	High	Master Protein	A0A100II14	Prefoldin subunit 5 OS=Aspergillus niger OX=5061 GN=ABL_04257 PE=4 SV=1	0.001	1.495	3.45912	1	1	1	1	318	34.8	8.63	1.95	1
FALSE	High	Master Protein	A0A2W4TEW9	Aldo/keto reductase OS=Proteobacteria bacterium OX=1977087 GN=DIU56_00760 PE=4 SV=1	0.001	1.485	4.01235	1	1	1	1	324	35.3	6.25	2.56	1
FALSE	High	Master Protein	A0A254U5F3	Methylthioribulose-1-phosphate dehydratase OS=Aspergillus niger OX=5061 GN=MDE1 PE=3 SV=1	0.001	1.482	4.13223	1	1	1	1	242	27.4	6.43	0	1
FALSE	High	Master Protein	A0A1S9DT59	Acetolactate synthase OS=Aspergillus oryzae OX=5062 GN=OAory_01086810 PE=3 SV=1	0.001	1.482	1.34745	1	1	1	1	1039	115.3	8.9	2.69	1
FALSE	High	Master Protein	A0A229YCS3	Glutamate decarboxylase OS=Neosartorya fumigata OX=746128 GN=CDV57_00389 PE=3 SV=1	0.001	1.478	0.511945	1	1	1	1	1758	197.3	7.06	2.31	1
FALSE	High	Master Protein	A0A100INA2	M28 family peptidase OS=Aspergillus niger OX=5061 GN=ABL_06990 PE=4 SV=1	0.001	1.477	1.79257	1	1	1	1	781	86.8	5.57	2.08	1
FALSE	High	Master Protein	A0A1M3TR72	Uncharacterized protein (Fragment) OS=Aspergillus luchuensis CBS 106.47 OX=1137211 GN=ASPFODRAFT_709940 PE=4 SV=1	0.001	1.468	3.76712	1	1	1	1	292	31.6	9.57	1.96	1
FALSE	High	Master Protein	G3Y1E0	Proteasome endopeptidase complex OS=Aspergillus niger (strain ATCC 1015 / CBS 113.46 / FGSC A1144 / LSHB Ac4 / NCTC 3858a / NRRL 328 / USDA 3528.7) OX=380704 GN=ASPNIDRAFT_52397 PE=3 SV=1	0.001	1.467	3.24484	1	1	1	1	339	36.9	7.12	2.69	1
FALSE	High	Master Protein	A0A0C1KP98	Uncharacterized protein OS=Flavihumibacter sp. ZG627 OX=1463156 GN=HY58_17215 PE=4 SV=1	0.001	1.461	6.32911	1	1	1	1	158	17.3	9.26	3.56	1
FALSE	High	Master Protein	A0A117DXR1	Endonuclease/exonuclease/phosphatase family protein OS=Aspergillus niger OX=5061 GN=ABL_02625 PE=4 SV=1	0.001	1.457	4.02685	1	1	1	1	298	33.6	6.34	0	1
FALSE	High	Master Protein	A0A100IE01	Carboxylic ester hydrolase OS=Aspergillus niger OX=5061 GN=ABL_03156 PE=3 SV=1	0.001	1.454	1.75781	1	1	1	1	512	55.2	4.94	1.89	1
FALSE	High	Master Protein	A0A1L9NJ92	3-hydroxyisobutyryl-CoA hydrolase, mitochondrial OS=Aspergillus tubingensis CBS 134.48 OX=767770 GN=ASPTUDRAFT_132978 PE=3 SV=1	0.001	1.449	1.80361	1	1	1	1	499	55.6	8.43	1.74	1
FALSE	High	Master Protein	A0A100IRS9	Uncharacterized protein OS=Aspergillus niger OX=5061 GN=ABL_08817 PE=3 SV=1	0.001	1.448	0.771704	1	1	1	1	1555	172.4	6.13	1.88	1
FALSE	High	Master Protein	A0A0F4Z4T5	Polyketide synthase (Fragment) OS=Rasamsonia emersonii CBS 393.64 OX=1408163 GN=T310_0867 PE=3 SV=1	0.001	1.433	0.539665	1	1	1	1	1853	201.6	6.21	1.79	1
FALSE	High	Master Protein	A0A117DXJ3	Stress responsive A/B barrel domain protein OS=Aspergillus niger OX=5061 GN=ABL_02459 PE=4 SV=1	0.001	1.424	8.65385	1	1	1	1	104	11.6	6.1	1.97	1
FALSE	High	Master Protein	A0A124BYG9	Pectate lyase OS=Aspergillus niger OX=5061 GN=ABL_08192 PE=3 SV=1	0.001	1.418	2.78638	1	1	1	1	323	34.4	4.78	2.14	1
FALSE	High	Master Protein	Q5B9P9	Uncharacterized protein OS=Emericella nidulans (strain FGSC A4 / ATCC 38163 / CBS 112.46 / NRRL 194 / M139) OX=227321 GN=AN2731.2 PE=3 SV=1	0.001	1.416	1.72414	1	1	1	1	464	50.9	6.32	2.3	1
FALSE	High	Master Protein	A0A146FPN7	Glial factor naturation factor OS=Aspergillus luchuensis OX=1069201 GN=RIB2604_02112210 PE=4 SV=1	0.001	1.414	9.72222	1	1	1	1	144	16.6	4.73	1.66	1
FALSE	High	Master Protein	G7XWA9	NAD-binding Rossmann fold oxidoreductase family protein OS=Aspergillus kawachii (strain NBRC 4308) OX=1033177 GN=AKAW_09332 PE=4 SV=1	0.001	1.413	1.81406	1	1	1	1	441	49.5	6.54	0	1
FALSE	High	Master Protein	A0A0L1IML3	Pyridoxine biosynthesis protein pyroA (Fragment) OS=Aspergillus nomius NRRL 13137 OX=1509407 GN=ANOM_010904 PE=3 SV=1	0.001	1.412	4.34783	1	1	1	1	322	34.2	5.95	0	1
FALSE	High	Master Protein	A1DP88	Reticulon-like protein OS=Neosartorya fischeri (strain ATCC 1020 / DSM 3700 / CBS 544.65 / FGSC A1164 / JCM 1740 / NRRL 181 / WB 181) OX=331117 GN=NFIA_059640 PE=4 SV=1	0.001	1.407	2.54237	1	1	1	1	354	39.5	6.19	2.16	1
FALSE	High	Master Protein	A0A100IHW8	Glycerol-3-phosphate phosphatase OS=Aspergillus niger OX=5061 GN=ABL_04241 PE=4 SV=1	0.001	1.394	4.88722	1	1	1	1	266	28.8	5.62	2.59	1
FALSE	High	Master Protein	A0A0U5GD00	Putative Eukaryotic translation initiation factor 5B OS=Aspergillus calidoustus OX=454130 GN=ASPCAL12221 PE=4 SV=1	0.001	1.389	1.02804	1	1	1	1	1070	118.6	5.59	1.75	1
FALSE	High	Master Protein	A0A1L9UGB3	Uncharacterized protein OS=Aspergillus brasiliensis CBS 101740 OX=767769 GN=ASPBRDRAFT_180929 PE=4 SV=1	0.001	1.387	2.25225	1	1	1	1	444	50.4	5.33	1.88	1
FALSE	High	Master Protein	A0A254ULQ8	Rhodanese-like domain family protein OS=Aspergillus niger OX=5061 GN=CAN33_26890 PE=4 SV=1	0.001	1.384	1.86104	1	1	1	1	806	89	9	0	1
FALSE	High	Master Protein	A0A017S5X8	MICOS complex subunit MIC10 OS=Aspergillus ruber CBS 135680 OX=1388766 GN=EURHEDRAFT_415498 PE=3 SV=1	0.001	1.383	13.8298	1	1	1	1	94	10.5	10.76	0	1
FALSE	High	Master Protein	A0A231MEP4	Trehalase OS=Aspergillus thermomutatus OX=41047 GN=CDV56_05179 PE=3 SV=1	0.001	1.382	0.760456	1	1	1	1	1578	178.7	7.06	1.65	1
FALSE	High	Master Protein	A2QT42	Aspergillus niger contig An09c0030, genomic contig OS=Aspergillus niger (strain CBS 513.88 / FGSC A1513) OX=425011 GN=An09g00700 PE=4 SV=1	0.001	1.373	3.21932	1	1	1	1	497	55.7	7.59	1.77	1
FALSE	High	Master Protein	Q5AZM5	Cytochrome c oxidase subunit OS=Emericella nidulans (strain FGSC A4 / ATCC 38163 / CBS 112.46 / NRRL 194 / M139) OX=227321 GN=AN6255.2 PE=3 SV=1	0.001	1.372	9.67742	1	1	1	1	93	11	7.21	2.22	1
FALSE	High	Master Protein	Q0CC32	Uncharacterized protein OS=Aspergillus terreus (strain NIH 2624 / FGSC A1156) OX=341663 GN=ATEG_08752 PE=4 SV=1	0.003	1.356	1.89753	1	1	1	1	527	57.3	7.06	0	1
FALSE	High	Master Protein	A0A0F4YED0	CRAL/TRIO domain protein OS=Rasamsonia emersonii CBS 393.64 OX=1408163 GN=T310_9811 PE=4 SV=1	0.003	1.355	2.07469	1	1	1	1	482	53.4	4.82	2.66	1
FALSE	High	Master Protein	A0A0L1JAB3	Uncharacterized protein OS=Aspergillus nomius NRRL 13137 OX=1509407 GN=ANOM_003331 PE=4 SV=1	0.003	1.355	1.85529	1	1	1	1	539	60.5	5.59	1.6	1
FALSE	High	Master Protein	A0A2K5A427	Protein ROT1 OS=Aspergillus niger OX=5061 GN=ATCC64974_44270 PE=3 SV=1	0.003	1.35	6.72269	1	1	1	1	238	26.3	5.81	0	1
FALSE	High	Master Protein	A0A100IAW8	Transulfuration enzyme family protein OS=Aspergillus niger OX=5061 GN=ABL_02360 PE=3 SV=1	0.003	1.349	2.03046	1	1	1	1	394	43.3	6.24	1.63	1
FALSE	High	Master Protein	A0A1L9NB83	Uncharacterized protein OS=Aspergillus tubingensis CBS 134.48 OX=767770 GN=ASPTUDRAFT_477146 PE=3 SV=1	0.003	1.348	4.41989	1	1	1	1	181	20.1	4.86	1.84	1
FALSE	High	Master Protein	A0A0L1J4Y2	Uncharacterized protein OS=Aspergillus nomius NRRL 13137 OX=1509407 GN=ANOM_006392 PE=3 SV=1	0.003	1.348	1.02881	1	1	1	1	972	106.5	6.62	0	1
FALSE	High	Master Protein	A0A0K8L6V2	Proteasome subunit beta type OS=Aspergillus udagawae OX=91492 GN=AUD_2767 PE=3 SV=1	0.003	1.342	3.79747	1	1	1	1	237	26.5	6.87	2.23	1
FALSE	High	Master Protein	A0A1M3T9B9	Uncharacterized protein OS=Aspergillus luchuensis CBS 106.47 OX=1137211 GN=ASPFODRAFT_314807 PE=4 SV=1	0.003	1.333	1.79641	1	1	1	1	668	74.7	7.62	1.85	1
FALSE	High	Master Protein	A0A146FIJ8	Mitochondrial acetolactate synthase small subunit OS=Aspergillus luchuensis OX=1069201 GN=RIB2604_02001550 PE=4 SV=1	0.003	1.328	2.99252	1	1	1	1	401	43.9	8.56	1.61	1
FALSE	High	Master Protein	A0A1L9NNV0	Uncharacterized protein OS=Aspergillus tubingensis CBS 134.48 OX=767770 GN=ASPTUDRAFT_52657 PE=4 SV=1	0.003	1.325	1.48064	1	1	1	1	878	95.3	6.99	2.06	1
FALSE	High	Master Protein	A0A1L9MVM4	Uncharacterized protein OS=Aspergillus tubingensis CBS 134.48 OX=767770 GN=ASPTUDRAFT_177142 PE=4 SV=1	0.003	1.319	5.66038	1	1	1	1	159	18.2	10.32	2.12	1
FALSE	High	Master Protein	A0A124BYW1	Alpha,alpha-trehalose phosphate synthase subunit Tps3 OS=Aspergillus niger OX=5061 GN=ABL_09452 PE=4 SV=1	0.003	1.314	1.03257	1	1	1	1	1259	140.6	6.37	2.27	1
FALSE	High	Master Protein	A0A2P2H1D2	Ubiquinone biosynthesis protein OS=Aspergillus flavus (strain ATCC MYA-384 / AF70) OX=1392242 GN=AFLA70_21g004480 PE=4 SV=1	0.003	1.308	3	1	1	1	1	300	33.3	9.48	2.27	1
FALSE	High	Master Protein	A0A1L9S0D3	Uncharacterized protein OS=Aspergillus wentii DTO 134E9 OX=1073089 GN=ASPWEDRAFT_34003 PE=4 SV=1	0.003	1.306	3.2967	1	1	1	1	364	40.1	7.2	1.77	1
FALSE	High	Master Protein	A0A146FNT7	Voltage-gated K+ channel beta subunit OS=Aspergillus luchuensis OX=1069201 GN=RIB2604_02105750 PE=4 SV=1	0.003	1.305	3.26975	1	1	1	1	367	41.2	7.42	1.88	1
FALSE	High	Master Protein	A0A1L9WL98	Uncharacterized protein OS=Aspergillus aculeatus ATCC 16872 OX=690307 GN=ASPACDRAFT_81090 PE=4 SV=1	0.003	1.297	3.80117	1	1	1	1	342	37.1	6.27	2.26	1
FALSE	High	Master Protein	A0A2I1CWD1	Putative ubiquitin C-terminal hydrolase OS=Aspergillus campestris IBT 28561 OX=1392248 GN=P168DRAFT_328928 PE=3 SV=1	0.003	1.297	1.54639	1	1	1	1	582	64.3	5.77	1.79	1
FALSE	High	Master Protein	A0A0F4YZR1	Stomatin family protein OS=Rasamsonia emersonii CBS 393.64 OX=1408163 GN=T310_2387 PE=4 SV=1	0.003	1.296	1.97044	1	1	1	1	406	44.9	7.21	2.06	1
FALSE	High	Master Protein	A0A2G6CW02	AraC family transcriptional regulator OS=Proteobacteria bacterium OX=1977087 GN=CSB48_14005 PE=4 SV=1	0.003	1.288	2.37389	1	1	1	1	337	39.5	8.94	2.01	1
FALSE	High	Master Protein	A0A117DXQ4	Uncharacterized protein OS=Aspergillus niger OX=5061 GN=ABL_02593 PE=3 SV=1	0.003	1.276	1.79283	1	1	1	1	502	55.1	8.57	1.64	1
FALSE	High	Master Protein	A0A100IBY6	PT repeat family protein OS=Aspergillus niger OX=5061 GN=ABL_02639 PE=4 SV=1	0.003	1.268	0.760456	1	1	1	1	1578	166.6	3.98	2.29	1
FALSE	High	Master Protein	G7XGM0	2,3-dihydroxybenzoic acid decarboxylase (DhbD) OS=Aspergillus kawachii (strain NBRC 4308) OX=1033177 GN=AKAW_04193 PE=4 SV=1	0.003	1.256	2.33918	1	1	1	1	342	39.2	5.47	1.88	1
FALSE	High	Master Protein	A0A1L9TWJ0	Uncharacterized protein OS=Aspergillus sydowii CBS 593.65 OX=1036612 GN=ASPSYDRAFT_83713 PE=4 SV=1	0.003	1.255	1.69492	1	1	1	1	590	62.1	9.58	1.64	1
FALSE	High	Master Protein	A0A100IR86	Non-specific serine/threonine protein kinase OS=Aspergillus niger OX=5061 GN=ABL_08361 PE=4 SV=1	0.003	1.253	1.7038	1	1	1	1	763	87.3	7.94	0	1
FALSE	High	Master Protein	A0A146EY29	Epoxide hydrolase OS=Aspergillus luchuensis OX=1069201 GN=RIB2604_00101830 PE=4 SV=1	0.003	1.247	3.17848	1	1	1	1	409	46	6.2	0	1
FALSE	High	Master Protein	G7XAN9	General amidase GmdA OS=Aspergillus kawachii (strain NBRC 4308) OX=1033177 GN=AKAW_02052 PE=4 SV=1	0.003	1.247	2.02703	1	1	1	1	592	64.1	6.05	0	1
FALSE	High	Master Protein	A0A1L9U615	Uncharacterized protein OS=Aspergillus brasiliensis CBS 101740 OX=767769 GN=ASPBRDRAFT_48119 PE=4 SV=1	0.003	1.244	3.86473	1	1	1	1	207	23.8	6.43	1.83	1
FALSE	High	Master Protein	A0A0L1JDV9	Prohibitin-1 (Fragment) OS=Aspergillus nomius NRRL 13137 OX=1509407 GN=ANOM_002378 PE=4 SV=1	0.003	1.241	3.83275	1	1	1	1	287	31.7	9.01	1.76	1
FALSE	High	Master Protein	A0A1G7UYQ5	Multiple sugar transport system substrate-binding protein OS=Fontibacillus panacisegetis OX=670482 GN=SAMN04488542_15211 PE=4 SV=1	0.003	1.236	1.74672	1	1	1	1	458	51.8	5.1	0	1
FALSE	High	Master Protein	A0A146EY60	Uncharacterized protein OS=Aspergillus luchuensis OX=1069201 GN=RIB2604_00301020 PE=4 SV=1	0.003	1.235	2.25989	1	1	1	1	354	38.9	5.31	2.16	1
FALSE	High	Master Protein	A0A2T5MAC5	Uncharacterized protein OS=Aspergillus ochraceoroseus IBT 24754 OX=1392256 GN=P175DRAFT_0554704 PE=4 SV=1	0.004	1.224	0.529451	1	1	1	1	1511	167.4	7.4	1.78	1
FALSE	High	Master Protein	A2QD25	Aspergillus niger contig An02c0160, genomic contig OS=Aspergillus niger (strain CBS 513.88 / FGSC A1513) OX=425011 GN=An02g05590 PE=3 SV=1	0.004	1.223	1.5873	1	1	1	1	693	74.6	6.87	2.4	1
FALSE	High	Master Protein	A0A124BYS6	Eukaryotic translation initiation factor 4E-1 OS=Aspergillus niger OX=5061 GN=ABL_09123 PE=3 SV=1	0.004	1.222	2.36842	1	1	1	1	380	41.7	8.78	1.84	1
FALSE	High	Master Protein	A0A1L9PBS4	Uncharacterized protein OS=Aspergillus versicolor CBS 583.65 OX=1036611 GN=ASPVEDRAFT_123274 PE=3 SV=1	0.004	1.221	3.64146	1	1	1	1	357	37.8	6.68	0	1
FALSE	High	Master Protein	A0A1E3B5R0	Glutathione reductase OS=Aspergillus cristatus OX=573508 GN=SI65_08278 PE=3 SV=1	0.004	1.219	1.80832	1	1	1	1	553	59.9	8.47	2.57	1
FALSE	High	Master Protein	A0A100IAM4	Dead box ATP-dependent rna helicase OS=Aspergillus niger OX=5061 GN=ABL_02306 PE=4 SV=1	0.004	1.218	0.888585	1	1	1	1	1463	163.7	6.35	2.11	1
FALSE	High	Master Protein	A0A0L1ILX2	Adenylosuccinate synthetase (Fragment) OS=Aspergillus nomius NRRL 13137 OX=1509407 GN=ANOM_011257 PE=3 SV=1	0.004	1.214	1.77384	1	1	1	1	451	49.3	7.03	2.3	1
FALSE	High	Master Protein	A0A1L9ULZ9	Uncharacterized protein OS=Aspergillus brasiliensis CBS 101740 OX=767769 GN=ASPBRDRAFT_42448 PE=4 SV=1	0.004	1.212	5.31401	1	1	1	1	207	23	4.79	2.13	1
FALSE	High	Master Protein	A0A2G7FKE3	Uridylate kinase OS=Aspergillus arachidicola OX=656916 GN=AARAC_011020 PE=3 SV=1	0.004	1.209	5.11628	1	1	1	1	215	23.6	6.01	2.48	1
FALSE	High	Master Protein	A0A1L9U3U6	Arabinan endo-1,5-alpha-L-arabinosidase OS=Aspergillus brasiliensis CBS 101740 OX=767769 GN=ASPBRDRAFT_69778 PE=3 SV=1	0.004	1.207	4.30769	1	1	1	1	325	34.8	4.25	0	1
FALSE	High	Master Protein	A0A0F8WA19	Homocitrate synthase OS=Aspergillus ochraceoroseus OX=138278 GN=AOCH_001706 PE=3 SV=1	0.004	1.205	1.60966	1	1	1	1	497	55	5.94	2.11	1
FALSE	High	Master Protein	A0A100IAS4	Uncharacterized protein OS=Aspergillus niger OX=5061 GN=ABL_02345 PE=4 SV=1	0.004	1.204	2.61628	1	1	1	1	344	36.5	5.48	2.05	1
FALSE	High	Master Protein	A0A0M0W915	Uncharacterized protein OS=Bacillus sp. FJAT-21945 OX=1581033 GN=AMS60_25405 PE=4 SV=1	0.004	1.203	6.50407	1	1	1	1	123	14.5	5.07	1.98	1
FALSE	High	Master Protein	A0A1J6WUZ7	Beta-galactosidase OS=Bacillus aquimaris OX=189382 GN=BHE18_01860 PE=3 SV=1	0.004	1.201	1.5456	1	1	1	1	647	74.4	5.5	0	1
FALSE	High	Master Protein	B8NG77	V-type ATPase F subunit, putative OS=Aspergillus flavus (strain ATCC 200026 / FGSC A1120 / NRRL 3357 / JCM 12722 / SRRC 167) OX=332952 GN=AFLA_134160 PE=4 SV=1	0.004	1.201	4.39024	1	1	1	1	205	22.9	5.78	2	1
FALSE	High	Master Protein	A0A0B8R7P3	PTS fructose transporter subunit IIA OS=Listeria monocytogenes OX=1639 GN=LmNIHS28_00910 PE=4 SV=1	0.004	1.201	1.32548	1	1	1	1	679	78	5.73	1.76	1
FALSE	High	Master Protein	A0A100IPD5	Carboxylesterase OS=Aspergillus niger OX=5061 GN=ABL_07572 PE=4 SV=1	0.004	1.2	2.35507	1	1	1	1	552	61	4.74	1.74	1
FALSE	High	Master Protein	A0A100I6J3	Glutaminyl-tRNA synthetase OS=Aspergillus niger OX=5061 GN=ABL_01245 PE=4 SV=1	0.004	1.199	0.775194	1	1	1	1	1290	142.1	5.22	1.69	1
FALSE	High	Master Protein	A0A077LZA1	Uncharacterized protein OS=Tetrasphaera japonica T1-X7 OX=1194083 GN=BN12_2620027 PE=4 SV=1	0.004	1.194	1.19581	1	1	1	1	669	72.9	5.73	2.23	1
FALSE	High	Master Protein	A0A0F4YWX6	Glycylpeptide N-tetradecanoyltransferase OS=Rasamsonia emersonii CBS 393.64 OX=1408163 GN=T310_3347 PE=3 SV=1	0.004	1.181	2.38095	1	1	1	1	546	61.6	7.28	2.08	1
FALSE	High	Master Protein	A0A286IGW6	Acetyl-CoA carboxylase, biotin carboxylase subunit OS=Cytophagales bacterium TFI 002 OX=1945892 GN=SAMN06298216_0304 PE=4 SV=1	0.004	1.178	2.44399	1	1	1	1	491	54.4	5.33	0	1
FALSE	High	Master Protein	A0A1L9XA83	Uncharacterized protein OS=Aspergillus aculeatus ATCC 16872 OX=690307 GN=ASPACDRAFT_74758 PE=4 SV=1	0.004	1.178	1.4733	1	1	1	1	543	59.6	8.68	0	1
FALSE	High	Master Protein	A0A117E306	U5 snRNP complex subunit OS=Aspergillus niger OX=5061 GN=ABL_09046 PE=4 SV=1	0.004	1.177	2.31548	1	1	1	1	691	75.7	8.56	0	1
FALSE	High	Master Protein	A0A1S9D4J4	UBA/THIF-type NAD/FAD binding protein OS=Aspergillus oryzae OX=5062 GN=OAory_01048380 PE=4 SV=1	0.004	1.173	3.20197	1	1	1	1	406	45.3	6.61	0	1
FALSE	High	Master Protein	A0A117DX26	GPI-anchored cell wall organization protein Ecm33 OS=Aspergillus niger OX=5061 GN=ABL_02084 PE=4 SV=1	0.004	1.17	2.49377	1	1	1	1	401	41.1	4.49	1.61	1
FALSE	High	Master Protein	A0A1A2RGM6	Uncharacterized protein OS=Mycobacterium sp. E2479 OX=1834134 GN=A5686_12670 PE=4 SV=1	0.004	1.169	5.06329	1	1	1	1	237	25.4	5.15	2.02	1
FALSE	High	Master Protein	A0A0K8LB52	Eukaryotic translation initiation factor 3 subunit K OS=Aspergillus udagawae OX=91492 GN=AUD_4337 PE=3 SV=1	0.004	1.167	2.39521	1	1	1	1	334	37.3	5.58	2.51	1
FALSE	High	Master Protein	A0A100IKS1	Acetylcholinesterase OS=Aspergillus niger OX=5061 GN=ABL_05227 PE=4 SV=1	0.004	1.163	1.11801	1	1	1	1	805	90.4	6.57	0	1
FALSE	High	Master Protein	A0A0Q7KEU8	3-ketoacyl-ACP reductase OS=Aeromicrobium sp. Root472D3 OX=1736540 GN=ASD10_16475 PE=4 SV=1	0.004	1.161	3.51562	1	1	1	1	256	26.3	4.92	2.55	1
FALSE	High	Master Protein	A0A100IRM3	Glutaminase GtaA OS=Aspergillus niger OX=5061 GN=ABL_08739 PE=4 SV=1	0.004	1.16	1.30246	1	1	1	1	691	75.3	4.46	2.16	1
FALSE	High	Master Protein	A0A0F4YT00	Mitochondrial carrier protein OS=Rasamsonia emersonii CBS 393.64 OX=1408163 GN=T310_4765 PE=3 SV=1	0.004	1.148	1.12518	1	1	1	1	711	79.1	8.94	1.78	1
FALSE	High	Master Protein	A0A100IQ14	Alpha,alpha-trehalose-phosphate synthase OS=Aspergillus niger OX=5061 GN=ABL_07929 PE=4 SV=1	0.004	1.145	1.05263	1	1	1	1	855	96.6	8.31	2.25	1
FALSE	High	Master Protein	A0A1L9USX4	Uncharacterized protein OS=Aspergillus brasiliensis CBS 101740 OX=767769 GN=ASPBRDRAFT_668564 PE=4 SV=1	0.004	1.142	4.10256	1	1	1	1	195	19.8	5.83	1.92	1
FALSE	High	Master Protein	A0A2N1GB13	Glycosyl transferase family 1 OS=Flavobacterium sp. ALD4 OX=2058314 GN=CXF59_00535 PE=4 SV=1	0.004	1.142	2.15054	1	1	1	1	372	43.2	9.47	1.9	1
FALSE	High	Master Protein	A0A1L9U779	Uncharacterized protein OS=Aspergillus brasiliensis CBS 101740 OX=767769 GN=ASPBRDRAFT_135175 PE=4 SV=1	0.004	1.14	1.23288	1	1	1	1	730	81.7	4.86	2.3	1
FALSE	High	Master Protein	A0A017SHB7	Acyl-CoA dehydrogenase NM domain-like protein OS=Aspergillus ruber CBS 135680 OX=1388766 GN=EURHEDRAFT_497303 PE=4 SV=1	0.004	1.139	1.75781	1	1	1	1	512	57.4	7.72	0	1
FALSE	High	Master Protein	A0A1L9N255	Uncharacterized protein OS=Aspergillus tubingensis CBS 134.48 OX=767770 GN=ASPTUDRAFT_57315 PE=4 SV=1	0.004	1.13	0.719424	1	1	1	1	1112	122	7.78	1.72	1

## Sheet: repeat 2
Checked	Protein FDR Confidence	Master	Accession	Description	Exp. q-value	Sum PEP Score	Coverage	# Peptides	# PSMs	# Unique Peptides	# Protein Groups	# AAs	MW [kDa]	calc. pI	Score Sequest HT	# Peptides Sequest HT
FALSE	High	Master Protein	G7XXM0	Uncharacterized protein OS=Aspergillus kawachii (strain NBRC 4308) OX=1033177 GN=AKAW_09800 PE=4 SV=1	0	130.246	11.1503	15	51	15	1	1417	151.4	5.58	162.13	15
FALSE	High	Master Protein	A0A117DYT5	Cobalamin-independent methionine synthase OS=Aspergillus niger OX=5061 GN=ABL_02132 PE=3 SV=1	0	105.343	33.3333	22	38	22	1	774	87.1	6.76	113.62	22
FALSE	High	Master Protein	A0A146FC89	Fructose-bisphosphate aldolase, class II OS=Aspergillus luchuensis OX=1069201 GN=RIB2604_01706270 PE=4 SV=1	0	104.831	27.5	10	27	10	1	360	39.4	5.81	112.76	10
FALSE	High	Master Protein	A0A1M3TZ99	Uncharacterized protein OS=Aspergillus luchuensis CBS 106.47 OX=1137211 GN=ASPFODRAFT_39211 PE=4 SV=1	0	94.213	28.7915	22	43	22	1	844	93.6	6.9	108.8	22
FALSE	High	Master Protein	A0A1L9MZE6	Uncharacterized protein OS=Aspergillus tubingensis CBS 134.48 OX=767770 GN=ASPTUDRAFT_126184 PE=3 SV=1	0	93.794	27.1586	16	39	15	1	637	69.4	5.17	111.91	16
FALSE	High	Master Protein	G7XK81	Conidiation-specific protein (Con-10) OS=Aspergillus kawachii (strain NBRC 4308) OX=1033177 GN=AKAW_05493 PE=4 SV=1	0	86.168	45.977	5	18	5	1	87	9.2	5.12	72.44	5
FALSE	High	Master Protein	A0A146FUI4	Transketolase OS=Aspergillus luchuensis OX=1069201 GN=RIB2604_02602360 PE=3 SV=1	0	86.135	31.4327	18	35	18	1	684	74.7	6.37	103.68	18
FALSE	High	Master Protein	A0A146FXI1	Uncharacterized protein OS=Aspergillus luchuensis OX=1069201 GN=RIB2604_03000840 PE=4 SV=1	0	68.082	17.6471	6	21	3	1	374	38.8	5.63	74.57	6
FALSE	High	Master Protein	A0A146F1W8	Transaldolase OS=Aspergillus luchuensis OX=1069201 GN=RIB2604_00603220 PE=4 SV=1	0	67.153	42.284	15	29	15	1	324	35.4	6.02	88.88	15
FALSE	High	Master Protein	A0A100IK75	ATP synthase subunit beta OS=Aspergillus niger OX=5061 GN=ABL_05426 PE=3 SV=1	0	64.237	29.9228	12	28	12	1	518	55.6	5.31	81.51	12
FALSE	High	Master Protein	A0A146F7G1	Phosphoenolpyruvate carboxykinase [ATP] OS=Aspergillus luchuensis OX=1069201 GN=RIB2604_01502570 PE=3 SV=1	0	64.032	27.3333	12	20	12	1	600	66.3	6.33	56.26	12
FALSE	High	Master Protein	A0A100I1U7	Catalase OS=Aspergillus niger OX=5061 GN=ABL_00030 PE=3 SV=1	0	63.435	19.945	13	19	13	1	727	80.2	5.26	60.77	13
FALSE	High	Master Protein	A0A1L9NPK9	Uncharacterized protein OS=Aspergillus tubingensis CBS 134.48 OX=767770 GN=ASPTUDRAFT_26610 PE=3 SV=1	0	62.171	27.3642	11	21	11	1	497	53.8	6.47	57.96	11
FALSE	High	Master Protein	G7XZ66	Formate dehydrogenase OS=Aspergillus kawachii (strain NBRC 4308) OX=1033177 GN=AKAW_10339 PE=3 SV=1	0	61.525	29.1866	11	22	1	1	418	45.5	8.07	66.38	11
FALSE	High	Master Protein	G7XH77	Translation elongation factor eEF-1 subunit gamma OS=Aspergillus kawachii (strain NBRC 4308) OX=1033177 GN=AKAW_04399 PE=4 SV=1	0	60.862	26.8949	11	21	11	1	409	46.1	7.02	62.55	11
FALSE	High	Master Protein	A0A146FP91	Endo-1,3-beta-glucanase Engl1 OS=Aspergillus luchuensis OX=1069201 GN=RIB2604_02111510 PE=4 SV=1	0	58.987	13.6033	12	22	1	1	963	103.7	5.67	68.26	12
FALSE	High	Master Protein	A0A1M3TGY4	Lytic polysaccharide monooxygenase OS=Aspergillus luchuensis CBS 106.47 OX=1137211 GN=ASPFODRAFT_207846 PE=4 SV=1	0	58.063	13.1367	5	26	2	1	373	38.7	5.62	93.56	5
FALSE	High	Master Protein	A2Q852	Aspergillus niger contig An01c0080, genomic contig OS=Aspergillus niger (strain CBS 513.88 / FGSC A1513) OX=425011 GN=An01g03090 PE=4 SV=1	0	57.412	13.0256	12	22	1	1	975	104.8	5.52	66.85	12
FALSE	High	Master Protein	A0A146FA76	Aconitate hydratase, mitochondrial OS=Aspergillus luchuensis OX=1069201 GN=RIB2604_01602440 PE=3 SV=1	0	57.05	21.3115	14	22	14	1	793	86.1	6.43	58.62	14
FALSE	High	Master Protein	A0A1M3TCZ1	Triosephosphate isomerase OS=Aspergillus luchuensis CBS 106.47 OX=1137211 GN=ASPFODRAFT_138607 PE=3 SV=1	0	56.834	39.3574	9	22	9	1	249	26.8	5.78	65.03	9
FALSE	High	Master Protein	A0A146FEW3	Exo-beta-1,3-glucanase OS=Aspergillus luchuensis OX=1069201 GN=RIB2604_01711360 PE=4 SV=1	0	56.79	9.86977	11	22	3	1	1459	159.3	6.04	67.37	11
FALSE	High	Master Protein	F8WSL2	Enolase/allergen Asp F 22 OS=Aspergillus luchuensis OX=1069201 GN=ALenoA PE=3 SV=1	0	54.323	23.0594	8	13	8	1	438	47.3	5.48	41.4	8
FALSE	High	Master Protein	A0A1L9UBY3	Formate dehydrogenase OS=Aspergillus brasiliensis CBS 101740 OX=767769 GN=ASPBRDRAFT_132104 PE=3 SV=1	0	53.921	29.1169	11	20	1	1	419	45.7	8.07	53.72	11
FALSE	High	Master Protein	A0A100ILI8	ATP synthase subunit alpha OS=Aspergillus niger OX=5061 GN=ABL_06100 PE=3 SV=1	0	53.699	21.5827	10	23	10	1	556	60	9.07	68.06	10
FALSE	High	Master Protein	A0A146G0S5	Adenosine kinase OS=Aspergillus luchuensis OX=1069201 GN=RIB2604_03501220 PE=4 SV=1	0	49.206	19.4915	6	17	6	1	354	38.3	5.55	51.04	6
FALSE	High	Master Protein	G7XGN1	Malate dehydrogenase OS=Aspergillus kawachii (strain NBRC 4308) OX=1033177 GN=AKAW_04204 PE=3 SV=1	0	48.878	33.8235	9	18	8	1	340	35.6	8.66	53.03	9
FALSE	High	Master Protein	A0A124BX74	Adenosylhomocysteinase OS=Aspergillus niger OX=5061 GN=ABL_04200 PE=3 SV=1	0	48.832	26.7261	11	22	11	1	449	49	6.29	64.64	11
FALSE	High	Master Protein	A0A1M3TQL6	Glycoside hydrolase family 55 protein OS=Aspergillus luchuensis CBS 106.47 OX=1137211 GN=ASPFODRAFT_129345 PE=4 SV=1	0	48.533	15.198	9	18	1	1	783	83.7	5.17	55.87	9
FALSE	High	Master Protein	A0A100I553	Ribose/galactose isomerase OS=Aspergillus niger OX=5061 GN=ABL_00941 PE=4 SV=1	0	47.305	54.9383	8	22	8	1	162	17.2	7.85	64.85	8
FALSE	High	Master Protein	A0A1L9N508	Uncharacterized protein OS=Aspergillus tubingensis CBS 134.48 OX=767770 GN=ASPTUDRAFT_56215 PE=3 SV=1	0	46.518	15.2381	10	15	10	1	840	91.5	7.99	45.65	10
FALSE	High	Master Protein	G7XV40	Preproproctase B OS=Aspergillus kawachii (strain NBRC 4308) OX=1033177 GN=AKAW_08863 PE=3 SV=1	0	46.194	25.1269	7	17	7	1	394	41.3	4.69	54.76	7
FALSE	High	Master Protein	A0A1M3THH9	Malate dehydrogenase OS=Aspergillus luchuensis CBS 106.47 OX=1137211 GN=ASPFODRAFT_208041 PE=3 SV=1	0	45.84	32.1212	9	13	8	1	330	34.5	6.57	41.72	9
FALSE	High	Master Protein	A0A1M3TU40	Uncharacterized protein OS=Aspergillus luchuensis CBS 106.47 OX=1137211 GN=ASPFODRAFT_67363 PE=4 SV=1	0	45.207	21.1511	11	15	2	1	695	77.8	6.89	39.25	11
FALSE	High	Master Protein	A0A1M3T678	Uncharacterized protein OS=Aspergillus luchuensis CBS 106.47 OX=1137211 GN=ASPFODRAFT_196979 PE=4 SV=1	0	44.649	23.9247	8	15	8	1	372	40.3	10.95	46.55	8
FALSE	High	Master Protein	A0A1L9NJE9	Uncharacterized protein OS=Aspergillus tubingensis CBS 134.48 OX=767770 GN=ASPTUDRAFT_49054 PE=4 SV=1	0	44.23	19.3407	8	15	8	1	455	51.7	7.25	41.64	8
FALSE	High	Master Protein	A0A146FTU0	Similar to An08g06730 OS=Aspergillus luchuensis OX=1069201 GN=RIB2604_02602520 PE=4 SV=1	0	44.121	25.1366	5	24	5	1	183	19.4	4.46	81.26	5
FALSE	High	Master Protein	A0A146F5U9	Amine oxidase OS=Aspergillus luchuensis OX=1069201 GN=RIB2604_00901340 PE=3 SV=1	0	44.079	23.0994	12	20	12	1	684	76.4	6.74	47.67	12
FALSE	High	Master Protein	A0A117DZT2	Phosphoglycerate kinase OS=Aspergillus niger OX=5061 GN=ABL_04221 PE=3 SV=1	0	43.528	33.8129	13	19	13	1	417	44.3	6.6	47.12	13
FALSE	High	Master Protein	A0A146F005	Hydrolase, CocE/NonD family OS=Aspergillus luchuensis OX=1069201 GN=RIB2604_00601180 PE=4 SV=1	0	43.182	20.1667	10	15	10	1	600	68.4	6.16	47.57	10
FALSE	High	Master Protein	A0A100IA53	Pyruvate carboxylase OS=Aspergillus niger OX=5061 GN=ABL_02163 PE=4 SV=1	0	42.006	13.3389	13	21	13	1	1192	130.9	6.51	51.49	13
FALSE	High	Master Protein	A0A124BXS3	Heat shock protein SSC1, mitochondrial OS=Aspergillus niger OX=5061 GN=ABL_05973 PE=3 SV=1	0	41.786	21.7718	11	15	11	1	666	72.1	5.83	39.53	11
FALSE	High	Master Protein	A0A1L9N8L0	Uncharacterized protein OS=Aspergillus tubingensis CBS 134.48 OX=767770 GN=ASPTUDRAFT_117665 PE=3 SV=1	0	41.636	20.7675	7	12	7	1	443	49.7	5.8	35.4	7
FALSE	High	Master Protein	A0A1M3TAS7	Beta-glucosidase OS=Aspergillus luchuensis CBS 106.47 OX=1137211 GN=ASPFODRAFT_35322 PE=3 SV=1	0	41.239	16.8213	13	23	13	1	862	93.5	4.84	65.21	13
FALSE	High	Master Protein	A0A146FPU9	Glycerol dehydrogenase OS=Aspergillus luchuensis OX=1069201 GN=RIB2604_02108170 PE=4 SV=1	0	39.983	42.4615	10	14	10	1	325	36.7	6.37	41.61	10
FALSE	High	Master Protein	A0A1M3T2L8	Uncharacterized protein OS=Aspergillus luchuensis CBS 106.47 OX=1137211 GN=ASPFODRAFT_52687 PE=4 SV=1	0	39.651	20.3593	5	12	5	1	334	36.9	6.46	42.9	5
FALSE	High	Master Protein	A0A124BXM2	Uncharacterized protein OS=Aspergillus niger OX=5061 GN=ABL_05492 PE=4 SV=1	0	39.617	20.9195	8	14	8	1	435	50.5	6.06	38.03	8
FALSE	High	Master Protein	A0A117E1C4	Polyketide synthase P OS=Aspergillus niger OX=5061 GN=ABL_06494 PE=4 SV=1	0	39.544	6.32558	12	15	12	1	2150	234	6.35	39.35	12
FALSE	High	Master Protein	G7XRI2	Similar to An08g02170 OS=Aspergillus kawachii (strain NBRC 4308) OX=1033177 GN=AKAW_07655 PE=4 SV=1	0	39.542	46.2766	7	13	7	1	188	20.5	4.77	40.47	7
FALSE	High	Master Protein	A0A146F8Z6	ATP citrate lyase subunit OS=Aspergillus luchuensis OX=1069201 GN=RIB2604_01500600 PE=4 SV=1	0	38.951	27.4227	12	22	12	1	485	52.9	6.23	48.38	12
FALSE	High	Master Protein	A0A0S7DEQ6	Actin, gamma OS=Aspergillus lentulus OX=293939 GN=ALT_0877 PE=3 SV=1	0	38.933	31.6901	11	17	11	1	426	47	6.42	45.09	11
FALSE	High	Master Protein	A0A146F3T8	Glutathione-dependent formaldehyde-activating enzyme OS=Aspergillus luchuensis OX=1069201 GN=RIB2604_00804450 PE=4 SV=1	0	38.648	14.1618	5	11	5	1	346	37.6	8	35.7	5
FALSE	High	Master Protein	A0A1M3TUW4	Uncharacterized protein OS=Aspergillus luchuensis CBS 106.47 OX=1137211 GN=ASPFODRAFT_418059 PE=4 SV=1	0	37.915	11.982	11	12	11	1	1110	122.8	6.74	31.61	11
FALSE	High	Master Protein	A0A146FPU4	Catalase-peroxidase OS=Aspergillus luchuensis OX=1069201 GN=katG PE=3 SV=1	0	37.612	17.3228	11	16	11	1	762	84.4	6.74	45.36	11
FALSE	High	Master Protein	A0A1L9MYV0	Uncharacterized protein OS=Aspergillus tubingensis CBS 134.48 OX=767770 GN=ASPTUDRAFT_125988 PE=3 SV=1	0	37.586	37.6923	10	14	9	1	260	28.9	4.84	39.13	10
FALSE	High	Master Protein	A0A146F317	Peptidyl-prolyl cis-trans isomerase OS=Aspergillus luchuensis OX=1069201 GN=RIB2604_00607100 PE=3 SV=1	0	37.097	51.7241	8	16	6	1	174	18.9	8.43	39.52	8
FALSE	High	Master Protein	A0A1M3TNM2	Uncharacterized protein OS=Aspergillus luchuensis CBS 106.47 OX=1137211 GN=ASPFODRAFT_205398 PE=4 SV=1	0	37.046	26.3736	3	10	3	1	182	19.6	5.1	38.77	3
FALSE	High	Master Protein	F8WSL1	Glyceraldehyde-3-phosphate dehydrogenase OS=Aspergillus luchuensis OX=1069201 GN=ALgpdA PE=3 SV=1	0	36.915	34.5238	9	21	6	1	336	36.2	7.11	59.8	9
FALSE	High	Master Protein	A2QMA8	Aspergillus niger contig An07c0020, genomic contig OS=Aspergillus niger (strain CBS 513.88 / FGSC A1513) OX=425011 GN=An07g01440 PE=4 SV=1	0	36.713	18.2961	10	12	1	1	716	80.6	7.06	34.09	10
FALSE	High	Master Protein	A0A1L9N080	6-phosphogluconate dehydrogenase, decarboxylating OS=Aspergillus tubingensis CBS 134.48 OX=767770 GN=ASPTUDRAFT_30718 PE=3 SV=1	0	36.604	20.8661	8	14	8	1	508	55.7	6.64	45.67	8
FALSE	High	Master Protein	A0A100INE1	Elongation factor 1-alpha OS=Aspergillus niger OX=5061 GN=ABL_07058 PE=3 SV=1	0	36.255	19.3478	9	18	5	1	460	49.9	8.92	53.6	9
FALSE	High	Master Protein	A0A254TLV6	14-3-3 protein family protein OS=Aspergillus niger OX=5061 GN=CAN33_44625 PE=3 SV=1	0	35.905	17.0588	6	11	5	1	340	38.5	6.46	32.18	6
FALSE	High	Master Protein	A0A100I837	RNA Polymerase II CTD phosphatase Fcp1 OS=Aspergillus niger OX=5061 GN=ABL_01670 PE=3 SV=1	0	35.856	3.38005	5	11	5	1	1213	133.7	4.78	35.56	5
FALSE	High	Master Protein	A0A100IJB0	Dihydrodipicolinate synthetase family protein OS=Aspergillus niger OX=5061 GN=ABL_04910 PE=3 SV=1	0	35.575	30.6452	8	14	8	1	310	33.7	7.33	44.55	8
FALSE	High	Master Protein	A0A100I3Y5	Isocitrate lyase OS=Aspergillus niger OX=5061 GN=ABL_00610 PE=3 SV=1	0	35.035	17.4721	8	10	8	1	538	60.1	6.92	26.37	8
FALSE	High	Master Protein	G7X9G9	6-phosphogluconolactonase OS=Aspergillus kawachii (strain NBRC 4308) OX=1033177 GN=AKAW_01702 PE=4 SV=1	0	34.784	18.7032	5	12	5	1	401	42.8	4.6	31.78	5
FALSE	High	Master Protein	A0A0K8LEU7	Heat shock protein 60 OS=Aspergillus udagawae OX=91492 GN=AUD_5825 PE=3 SV=1	0	33.422	20.2381	9	11	9	1	588	62	5.64	26.05	9
FALSE	High	Master Protein	A0A100IRD7	Beta-hexosaminidase OS=Aspergillus niger OX=5061 GN=ABL_08622 PE=3 SV=1	0	33.385	13.6439	7	12	2	1	601	67.4	4.94	31.46	7
FALSE	High	Master Protein	A0A100IKP3	Peroxisomal multifunctional beta-oxidation protein OS=Aspergillus niger OX=5061 GN=ABL_05683 PE=4 SV=1	0	33.289	13.6515	9	9	9	1	901	97	8.22	24.61	9
FALSE	High	Master Protein	A0A1L9MW36	Aminopeptidase OS=Aspergillus tubingensis CBS 134.48 OX=767770 GN=ASPTUDRAFT_46577 PE=3 SV=1	0	32.966	14.3585	13	16	13	1	982	108.6	6.61	36.97	13
FALSE	High	Master Protein	G3XPC0	Histidinol dehydrogenase OS=Aspergillus niger (strain ATCC 1015 / CBS 113.46 / FGSC A1144 / LSHB Ac4 / NCTC 3858a / NRRL 328 / USDA 3528.7) OX=380704 GN=ASPNIDRAFT_56640 PE=3 SV=1	0	32.868	23.3184	7	8	7	1	446	47.8	6.55	21.33	7
FALSE	High	Master Protein	A0A1M3T633	Uncharacterized protein OS=Aspergillus luchuensis CBS 106.47 OX=1137211 GN=ASPFODRAFT_143419 PE=4 SV=1	0	32.48	18.8776	6	18	6	1	392	43.5	5.5	48.89	6
FALSE	High	Master Protein	A0A1M3TYR2	Uncharacterized protein OS=Aspergillus luchuensis CBS 106.47 OX=1137211 GN=ASPFODRAFT_27663 PE=4 SV=1	0	32.273	26.7974	7	10	7	1	306	32.1	6.87	26.31	7
FALSE	High	Master Protein	A0A0F4YUE9	60S ribosomal protein L8 OS=Rasamsonia emersonii CBS 393.64 OX=1408163 GN=T310_4071 PE=4 SV=1	0	32.089	14.9606	2	9	2	1	254	27.5	10.78	22.23	2
FALSE	High	Master Protein	A0A100IJD8	Alpha-1,4 glucan phosphorylase OS=Aspergillus niger OX=5061 GN=ABL_04462 PE=3 SV=1	0	32.079	12.7128	9	11	9	1	881	100.5	6.13	27.24	9
FALSE	High	Master Protein	A0A1L9NKL5	Uncharacterized protein OS=Aspergillus tubingensis CBS 134.48 OX=767770 GN=ASPTUDRAFT_60524 PE=4 SV=1	0	31.908	32.967	9	13	9	1	273	31.5	9.96	35.93	9
FALSE	High	Master Protein	A0A146EZJ7	UTP--glucose-1-phosphate uridylyltransferase OS=Aspergillus luchuensis OX=1069201 GN=RIB2604_00300890 PE=3 SV=1	0	31.606	20.1536	8	11	8	1	521	57.9	7.24	30.1	8
FALSE	High	Master Protein	A0A1M3U0W0	NADH-cytochrome b5 reductase OS=Aspergillus luchuensis CBS 106.47 OX=1137211 GN=ASPFODRAFT_40076 PE=3 SV=1	0	31.409	34.1615	10	10	10	1	322	36.1	8.85	28.24	10
FALSE	High	Master Protein	A0A100IDW3	Similar to An07g04590 OS=Aspergillus niger OX=5061 GN=ABL_03147 PE=4 SV=1	0	30.88	5.19547	8	14	8	1	1944	210.9	9.36	39	8
FALSE	High	Master Protein	A0A1L9N7K0	Uncharacterized protein OS=Aspergillus tubingensis CBS 134.48 OX=767770 GN=ASPTUDRAFT_54933 PE=3 SV=1	0	30.601	21.4414	10	13	10	1	555	60.4	6.02	34.26	10
FALSE	High	Master Protein	A0A100IQ27	60S ribosomal protein L7A OS=Aspergillus niger OX=5061 GN=ABL_07931 PE=4 SV=1	0	30.299	13.2883	6	13	6	1	444	49.2	9.77	35.04	6
FALSE	High	Master Protein	A0A1M3TB08	Uncharacterized protein OS=Aspergillus luchuensis CBS 106.47 OX=1137211 GN=ASPFODRAFT_140389 PE=3 SV=1	0	30.191	24.1379	7	18	7	1	319	34.4	9.86	49.88	7
FALSE	High	Master Protein	A0A1M3TUB6	Uncharacterized protein OS=Aspergillus luchuensis CBS 106.47 OX=1137211 GN=ASPFODRAFT_40558 PE=4 SV=1	0	30.186	25.6684	4	15	1	1	187	20.3	5.57	40.66	4
FALSE	High	Master Protein	G7XC47	Inorganic diphosphatase OS=Aspergillus kawachii (strain NBRC 4308) OX=1033177 GN=AKAW_02525 PE=4 SV=1	0	29.869	36.2369	9	17	9	1	287	32.3	5.36	46.41	9
FALSE	High	Master Protein	A0A146FLT9	Hydrophobin OS=Aspergillus luchuensis OX=1069201 GN=RIB2604_02007320 PE=3 SV=1	0	29.851	18.9024	1	3	1	1	164	16.3	4.2	14.99	1
FALSE	High	Master Protein	G7X6H6	Glutamate dehydrogenase OS=Aspergillus kawachii (strain NBRC 4308) OX=1033177 GN=AKAW_00703 PE=3 SV=1	0	29.794	25.8696	9	11	9	1	460	49.4	6.1	26.14	9
FALSE	High	Master Protein	G7X4S1	Telomere and ribosome associated protein Stm1 OS=Aspergillus kawachii (strain NBRC 4308) OX=1033177 GN=AKAW_00208 PE=4 SV=1	0	29.751	20.598	6	9	6	1	301	33.2	9.64	23.84	6
FALSE	High	Master Protein	A0A1M3T6Z1	Beta-hexosaminidase OS=Aspergillus luchuensis CBS 106.47 OX=1137211 GN=ASPFODRAFT_36898 PE=3 SV=1	0	29.599	11.4618	6	10	1	1	602	67.6	4.93	25.76	6
FALSE	High	Master Protein	A0A1L9UFR2	Uncharacterized protein OS=Aspergillus brasiliensis CBS 101740 OX=767769 GN=ASPBRDRAFT_155391 PE=3 SV=1	0	29.405	27.8195	6	12	6	1	266	29.2	9.1	35.83	6
FALSE	High	Master Protein	A0A1L9MVH2	Aspartate aminotransferase OS=Aspergillus tubingensis CBS 134.48 OX=767770 GN=ASPTUDRAFT_127946 PE=4 SV=1	0	29.36	24.7086	9	11	9	1	429	46.9	8.72	31.79	9
FALSE	High	Master Protein	A0A1M3T7I9	Multicopper oxidase OS=Aspergillus luchuensis CBS 106.47 OX=1137211 GN=ASPFODRAFT_50562 PE=3 SV=1	0	29.347	11.5073	6	15	6	1	617	68.3	5.24	36.97	6
FALSE	High	Master Protein	A0A1L9NPS3	Carboxypeptidase OS=Aspergillus tubingensis CBS 134.48 OX=767770 GN=ASPTUDRAFT_298164 PE=3 SV=1	0	29.315	10.2334	6	14	6	1	557	62.1	5.12	37.55	6
FALSE	High	Master Protein	A0A146FPS5	Fumarylacetoacetate hydrolase family protein OS=Aspergillus luchuensis OX=1069201 GN=RIB2604_02109200 PE=4 SV=1	0	29.104	16.9492	4	8	4	1	295	31.5	5.67	24.27	4
FALSE	High	Master Protein	A0A1M3T912	Uncharacterized protein OS=Aspergillus luchuensis CBS 106.47 OX=1137211 GN=ASPFODRAFT_49880 PE=4 SV=1	0	29.038	20.4301	9	11	8	1	465	49.4	6.02	32.04	9
FALSE	High	Master Protein	A0A146F537	Demethylmenaquinone methyltransferase family protein OS=Aspergillus luchuensis OX=1069201 GN=RIB2604_00803430 PE=4 SV=1	0	28.937	20.0873	7	12	6	1	458	49	5.3	32.34	7
FALSE	High	Master Protein	A0A100IKY7	Phosphoglycerate mutase OS=Aspergillus niger OX=5061 GN=ABL_05814 PE=3 SV=1	0	28.928	15	6	8	6	1	520	57	5.68	21.11	6
FALSE	High	Master Protein	A0A146F2R7	Glucanase OS=Aspergillus luchuensis OX=1069201 GN=RIB2604_00608030 PE=3 SV=1	0	28.803	14.3805	5	11	4	1	452	48.2	4.36	30.84	5
FALSE	High	Master Protein	A0A1M3TIT9	Uncharacterized protein OS=Aspergillus luchuensis CBS 106.47 OX=1137211 GN=ASPFODRAFT_32824 PE=4 SV=1	0	28.599	20.202	3	15	3	1	198	21.5	5.55	55.94	3
FALSE	High	Master Protein	A0A117DUY3	Conserved lysine-rich protein OS=Aspergillus niger OX=5061 GN=ABL_00502 PE=4 SV=1	0	28.553	16.9776	8	10	8	1	536	56.2	4.93	28.51	8
FALSE	High	Master Protein	G7XB55	ATP-citrate synthase subunit 1 OS=Aspergillus kawachii (strain NBRC 4308) OX=1033177 GN=AKAW_02252 PE=4 SV=1	0	28.493	13.7195	7	10	7	1	656	71.5	8.05	27.87	7
FALSE	High	Master Protein	A0A1L9N1J3	Uncharacterized protein OS=Aspergillus tubingensis CBS 134.48 OX=767770 GN=ASPTUDRAFT_57142 PE=4 SV=1	0	28.428	8.43206	9	11	6	1	1435	155.6	8.18	22.29	9
FALSE	High	Master Protein	A0A100IHH4	Glutaredoxin OS=Aspergillus niger OX=5061 GN=ABL_04082 PE=4 SV=1	0	27.849	18.4652	6	8	6	1	417	46.4	9.06	25.17	6
FALSE	High	Master Protein	P56205	Cytochrome c OS=Aspergillus niger OX=5061 GN=cycA PE=1 SV=1	0	27.686	42.3423	6	10	6	1	111	11.9	9.22	28.37	6
FALSE	High	Master Protein	A0A146F2G5	3-ketoacyl-CoA thiolase OS=Aspergillus luchuensis OX=1069201 GN=RIB2604_00701680 PE=3 SV=1	0	27.648	22.276	8	11	7	1	413	43.3	6.89	25.95	8
FALSE	High	Master Protein	A0A146F1R9	Serine proteinase OS=Aspergillus luchuensis OX=1069201 GN=RIB2604_00603240 PE=3 SV=1	0	27.518	12.6394	5	14	5	1	538	57.5	6.77	38.04	5
FALSE	High	Master Protein	A0A1M3T5V7	Uncharacterized protein OS=Aspergillus luchuensis CBS 106.47 OX=1137211 GN=ASPFODRAFT_210863 PE=3 SV=1	0	27.51	14.5299	9	12	9	1	702	79.7	5.02	33.21	9
FALSE	High	Master Protein	A0A117E3B4	Mandelate racemase/muconate lactonizing enzyme family protein OS=Aspergillus niger OX=5061 GN=ABL_09496 PE=4 SV=1	0	27.305	15.7647	5	8	5	1	425	46.6	6.29	23.69	5
FALSE	High	Master Protein	A0A1L9MQS4	Uncharacterized protein OS=Aspergillus tubingensis CBS 134.48 OX=767770 GN=ASPTUDRAFT_155507 PE=4 SV=1	0	27.131	5.54723	9	10	9	1	2001	225.2	6.33	24.39	9
FALSE	High	Master Protein	A0A1L9N8J9	Uncharacterized protein OS=Aspergillus tubingensis CBS 134.48 OX=767770 GN=ASPTUDRAFT_118261 PE=3 SV=1	0	26.836	16.7002	6	7	6	1	497	53.9	6.73	19.92	6
FALSE	High	Master Protein	A0A117DZV1	S-adenosylmethionine synthase OS=Aspergillus niger OX=5061 GN=ABL_04247 PE=3 SV=1	0	26.265	23.7726	7	10	5	1	387	42.1	5.88	29.23	7
FALSE	High	Master Protein	G7XV12	Cell surface protein OS=Aspergillus kawachii (strain NBRC 4308) OX=1033177 GN=AKAW_08835 PE=4 SV=1	0	26.034	23.4266	3	5	3	1	286	29.3	7.09	13.35	3
FALSE	High	Master Protein	A0A100I2G0	Alcohol dehydrogenase OS=Aspergillus niger OX=5061 GN=ABL_00195 PE=3 SV=1	0	25.862	20.6897	6	9	6	1	348	37.8	6.07	23.4	6
FALSE	High	Master Protein	A0A1L9MW25	Peroxidase OS=Aspergillus tubingensis CBS 134.48 OX=767770 GN=ASPTUDRAFT_128090 PE=3 SV=1	0	25.67	14.4385	6	8	6	1	561	62.1	6.02	20.62	6
FALSE	High	Master Protein	A0A100IMH1	Citrate synthase OS=Aspergillus niger OX=5061 GN=ABL_06568 PE=3 SV=1	0	25.587	18.9873	8	13	8	1	474	52	8.46	33.46	8
FALSE	High	Master Protein	A0A2K4ZX86	40S ribosomal protein S8 OS=Aspergillus niger OX=5061 GN=ATCC64974_20570 PE=3 SV=1	0	25.448	16.6259	5	8	5	1	409	45.8	10.33	25.44	5
FALSE	High	Master Protein	A0A1M3TK23	Uncharacterized protein OS=Aspergillus luchuensis CBS 106.47 OX=1137211 GN=ASPFODRAFT_59539 PE=4 SV=1	0	25.28	8.59504	9	9	9	1	1210	132.9	5.22	23.38	9
FALSE	High	Master Protein	A0A1L9N423	Uncharacterized protein OS=Aspergillus tubingensis CBS 134.48 OX=767770 GN=ASPTUDRAFT_29947 PE=4 SV=1	0	25.273	25.6809	4	5	4	1	257	27.7	6.23	15.91	4
FALSE	High	Master Protein	A0A023UH08	Endo-beta-1, 4-glucanase OS=Aspergillus niger OX=5061 GN=eg1 PE=2 SV=1	0	25.069	12.9518	3	5	1	1	332	36.8	4.59	16.64	3
FALSE	High	Master Protein	A0A146F0P2	Cupin domain protein OS=Aspergillus luchuensis OX=1069201 GN=RIB2604_00601170 PE=4 SV=1	0	24.988	26.2032	4	14	1	1	187	20.2	5.17	36.83	4
FALSE	High	Master Protein	A0A1M3T705	Uncharacterized protein OS=Aspergillus luchuensis CBS 106.47 OX=1137211 GN=ASPFODRAFT_326765 PE=4 SV=1	0	24.879	11.976	3	8	3	1	334	37.1	4.82	30.57	3
FALSE	High	Master Protein	A0A1M3TR80	Uncharacterized protein OS=Aspergillus luchuensis CBS 106.47 OX=1137211 GN=ASPFODRAFT_57993 PE=3 SV=1	0	24.784	16.5563	9	10	9	1	604	66.4	5.57	21.28	9
FALSE	High	Master Protein	A0A254U4M8	S-(Hydroxymethyl)glutathione dehydrogenase/class III alcohol dehydrogenase OS=Aspergillus niger OX=5061 GN=CAN33_8050 PE=4 SV=1	0	24.52	9.88701	8	11	5	1	708	75.8	7.68	32.78	8
FALSE	High	Master Protein	A0A1L9NBD9	Uncharacterized protein OS=Aspergillus tubingensis CBS 134.48 OX=767770 GN=ASPTUDRAFT_27587 PE=4 SV=1	0	24.318	22.439	4	6	4	1	205	22	6.92	16.66	4
FALSE	High	Master Protein	G7XDN4	Uncharacterized protein OS=Aspergillus kawachii (strain NBRC 4308) OX=1033177 GN=AKAW_02999 PE=4 SV=1	0	24.309	7.42438	7	8	7	1	1091	122.6	7.52	19.31	7
FALSE	High	Master Protein	A0A1L9N3T7	Glucose-6-phosphate isomerase OS=Aspergillus tubingensis CBS 134.48 OX=767770 GN=ASPTUDRAFT_55950 PE=3 SV=1	0	24.302	14.4665	6	9	4	1	553	61.5	6.35	24.61	6
FALSE	High	Master Protein	G7XC68	Alpha-mannosidase OS=Aspergillus kawachii (strain NBRC 4308) OX=1033177 GN=AKAW_02546 PE=3 SV=1	0	24.264	8.17264	7	9	7	1	1089	123.2	6.6	19.97	7
FALSE	High	Master Protein	A0A146FHC5	Tat pathway signal sequence domain-containing protein OS=Aspergillus luchuensis OX=1069201 GN=RIB2604_01807360 PE=4 SV=1	0	24.224	8.4425	4	6	4	1	687	75.9	4.97	17.77	4
FALSE	High	Master Protein	A0A100IUJ8	Cupin domain protein OS=Aspergillus niger OX=5061 GN=ABL_10273 PE=4 SV=1	0	23.937	23.5294	3	7	3	1	187	20.3	5.38	17.4	3
FALSE	High	Master Protein	A0A146FBA9	alpha-1,2-Mannosidase OS=Aspergillus luchuensis OX=1069201 GN=RIB2604_01703360 PE=3 SV=1	0	23.884	13.0604	5	9	5	1	513	55.9	5.1	31.69	5
FALSE	High	Master Protein	A0A146G2H5	Quinate 5-dehydrogenase QutB OS=Aspergillus luchuensis OX=1069201 GN=RIB2604_04300010 PE=4 SV=1	0	23.732	22.6087	6	9	6	1	345	37.2	6.1	25.96	6
FALSE	High	Master Protein	A0A117E139	Uncharacterized protein OS=Aspergillus niger OX=5061 GN=ABL_06079 PE=4 SV=1	0	23.696	13.7441	7	8	7	1	633	67.7	6.81	18.29	7
FALSE	High	Master Protein	G7XHM5	Acetyl-CoA carboxylase OS=Aspergillus kawachii (strain NBRC 4308) OX=1033177 GN=AKAW_04548 PE=4 SV=1	0	23.635	4.90583	8	8	8	1	2283	254.6	6.28	19.75	8
FALSE	High	Master Protein	A0A1L9N810	Uncharacterized protein OS=Aspergillus tubingensis CBS 134.48 OX=767770 GN=ASPTUDRAFT_74721 PE=3 SV=1	0	23.58	20	5	6	5	1	335	35.8	6.7	14.43	5
FALSE	High	Master Protein	A0A100IGI7	Ubiquitin-activating enzyme E1 1 OS=Aspergillus niger OX=5061 GN=ABL_03599 PE=3 SV=1	0	23.283	6.71186	8	11	8	1	1475	165.7	5.87	25.82	8
FALSE	High	Master Protein	A0A100INV8	40S ribosomal protein S4 OS=Aspergillus niger OX=5061 GN=ABL_07316 PE=3 SV=1	0	23.214	26.3566	6	10	6	1	258	29	10.13	28.2	6
FALSE	High	Master Protein	A0A146FL86	Aha1 domain family OS=Aspergillus luchuensis OX=1069201 GN=RIB2604_02004910 PE=4 SV=1	0	23.003	23.3333	6	6	6	1	330	36.5	5.58	13.34	6
FALSE	High	Master Protein	A0A100IQP6	3,4-dihydroxy-2-butanone 4-phosphate synthase OS=Aspergillus niger OX=5061 GN=ABL_07942 PE=3 SV=1	0	22.992	24.1379	5	7	5	1	232	24.6	5.05	22.26	5
FALSE	High	Master Protein	A0A1L9NPQ6	Uncharacterized protein OS=Aspergillus tubingensis CBS 134.48 OX=767770 GN=ASPTUDRAFT_38226 PE=3 SV=1	0	22.858	48.3871	8	14	8	1	155	17.9	10.45	34.91	8
FALSE	High	Master Protein	A0A1M3TI57	Uncharacterized protein OS=Aspergillus luchuensis CBS 106.47 OX=1137211 GN=ASPFODRAFT_45916 PE=4 SV=1	0	22.831	13.7143	6	7	6	1	525	58.2	6.49	22.67	6
FALSE	High	Master Protein	A0A146FMI1	Uncharacterized protein OS=Aspergillus luchuensis OX=1069201 GN=RIB2604_02101700 PE=4 SV=1	0	22.8	28.4722	4	10	4	1	144	15.7	6.18	27.9	4
FALSE	High	Master Protein	A0A146EZE9	Uncharacterized protein OS=Aspergillus luchuensis OX=1069201 GN=RIB2604_00600010 PE=4 SV=1	0	22.722	9.15842	6	6	6	1	808	86.5	4.93	17.82	6
FALSE	High	Master Protein	G7XZ33	Uncharacterized protein OS=Aspergillus kawachii (strain NBRC 4308) OX=1033177 GN=AKAW_10297 PE=4 SV=1	0	22.492	44.3182	3	11	3	1	88	9.6	7.06	31.81	3
FALSE	High	Master Protein	A0A1M3TXB9	Uncharacterized protein OS=Aspergillus luchuensis CBS 106.47 OX=1137211 GN=ASPFODRAFT_41919 PE=4 SV=1	0	22.358	13.0354	6	9	6	1	537	60	6.11	25.02	6
FALSE	High	Master Protein	A0A1L9NMI3	Uncharacterized protein OS=Aspergillus tubingensis CBS 134.48 OX=767770 GN=ASPTUDRAFT_52378 PE=3 SV=1	0	22.302	8.00451	6	8	6	1	887	97.5	6.64	20.62	6
FALSE	High	Master Protein	G7XCK6	Glycosyl hydrolase, family 18 OS=Aspergillus kawachii (strain NBRC 4308) OX=1033177 GN=AKAW_02399 PE=3 SV=1	0	22.125	17.4419	6	10	6	1	430	46.7	5.03	23.07	6
FALSE	High	Master Protein	A0A1R3RS12	Uncharacterized protein OS=Aspergillus carbonarius (strain ITEM 5010) OX=602072 GN=ASPCADRAFT_395503 PE=3 SV=1	0	22.114	27.5	5	9	5	1	200	23.1	10.35	22.57	5
FALSE	High	Master Protein	A0A1L9NBJ8	Succinate dehydrogenase assembly factor 2, mitochondrial OS=Aspergillus tubingensis CBS 134.48 OX=767770 GN=ASPTUDRAFT_64050 PE=3 SV=1	0	21.993	7.63521	7	11	7	1	943	104.8	8	26.52	7
FALSE	High	Master Protein	A0A1L9NE82	Uncharacterized protein OS=Aspergillus tubingensis CBS 134.48 OX=767770 GN=ASPTUDRAFT_432662 PE=4 SV=1	0	21.816	37.8882	5	9	5	1	161	18.9	4.98	23.02	5
FALSE	High	Master Protein	G7XGG7	Uncharacterized protein OS=Aspergillus kawachii (strain NBRC 4308) OX=1033177 GN=AKAW_04140 PE=4 SV=1	0	21.808	40.2174	3	5	3	1	92	10.2	6.77	15.47	3
FALSE	High	Master Protein	A0A100IE90	Hydrophobin OS=Aspergillus niger OX=5061 GN=ABL_03228 PE=3 SV=1	0	21.792	27.1084	4	29	3	1	166	16.6	4.48	74.88	4
FALSE	High	Master Protein	A0A1L9U999	Uncharacterized protein OS=Aspergillus brasiliensis CBS 101740 OX=767769 GN=ASPBRDRAFT_47203 PE=3 SV=1	0	21.735	15.5521	8	9	8	1	643	73	8.73	17.36	8
FALSE	High	Master Protein	A0A1L9N6X0	Uncharacterized protein OS=Aspergillus tubingensis CBS 134.48 OX=767770 GN=ASPTUDRAFT_54722 PE=3 SV=1	0	21.677	9.3199	6	8	6	1	794	87.3	5.76	19.46	6
FALSE	High	Master Protein	A0A1M3TBX5	Rhamnogalacturonate lyase OS=Aspergillus luchuensis CBS 106.47 OX=1137211 GN=ASPFODRAFT_138568 PE=3 SV=1	0	21.67	13.2576	5	7	5	1	528	57	4.65	23.77	5
FALSE	High	Master Protein	A0A1M3TXM4	2-dehydropantoate 2-reductase OS=Aspergillus luchuensis CBS 106.47 OX=1137211 GN=ASPFODRAFT_38665 PE=3 SV=1	0	21.549	16.1491	4	6	4	1	322	35.1	6.8	12.92	4
FALSE	High	Master Protein	A0A100II13	60S ribosomal protein L6 OS=Aspergillus niger OX=5061 GN=ABL_04295 PE=4 SV=1	0	21.521	28.7129	5	10	5	1	202	22.5	10.17	27.97	5
FALSE	High	Master Protein	A0A100IME6	Uncharacterized protein LOC100191558 OS=Aspergillus niger OX=5061 GN=ABL_06566 PE=4 SV=1	0	21.487	18.5185	6	8	6	1	459	47.7	8.63	22.49	6
FALSE	High	Master Protein	A0A146FG16	Similar to An12g02680 OS=Aspergillus luchuensis OX=1069201 GN=RIB2604_01806770 PE=4 SV=1	0	21.252	20.5405	4	5	4	1	185	20.5	4.61	15.3	4
FALSE	High	Master Protein	G7XW48	Heat shock protein OS=Aspergillus kawachii (strain NBRC 4308) OX=1033177 GN=AKAW_09271 PE=4 SV=1	0	21.205	14.4578	7	7	7	1	581	64.1	5.36	14.67	7
FALSE	High	Master Protein	A0A117DVZ2	Peptide hydrolase OS=Aspergillus niger OX=5061 GN=ABL_01267 PE=3 SV=1	0	21.174	8.09524	4	5	4	1	630	68.8	4.84	16.94	4
FALSE	High	Master Protein	G3YG02	Oxidoreductase OS=Aspergillus niger (strain ATCC 1015 / CBS 113.46 / FGSC A1144 / LSHB Ac4 / NCTC 3858a / NRRL 328 / USDA 3528.7) OX=380704 GN=ASPNIDRAFT_38546 PE=4 SV=1	0	21.165	18.4127	5	8	2	1	315	35.4	6.8	22.96	5
FALSE	High	Master Protein	A0A1M3TBX6	Uncharacterized protein OS=Aspergillus luchuensis CBS 106.47 OX=1137211 GN=ASPFODRAFT_48255 PE=4 SV=1	0	21.139	14.8423	8	11	8	1	539	59.2	5.71	26.21	8
FALSE	High	Master Protein	A0A146FV20	Oligopeptidase family protein OS=Aspergillus luchuensis OX=1069201 GN=RIB2604_02701070 PE=4 SV=1	0	21.088	10.8666	7	7	7	1	727	79.8	6.18	14.17	7
FALSE	High	Master Protein	Q5AWS6	Cell division control protein 48 OS=Emericella nidulans (strain FGSC A4 / ATCC 38163 / CBS 112.46 / NRRL 194 / M139) OX=227321 GN=cdc48 PE=1 SV=2	0	21.068	8.14095	5	7	5	1	823	90.5	5.15	21.57	5
FALSE	High	Master Protein	A0A1M3U1K1	Endo-1,4-beta-xylanase OS=Aspergillus luchuensis CBS 106.47 OX=1137211 GN=ASPFODRAFT_122170 PE=3 SV=1	0	21.061	14.6667	2	3	2	1	225	24.2	6.16	11.39	2
FALSE	High	Master Protein	A0A124BVF1	Mitochondrial phosphate carrier protein OS=Aspergillus niger OX=5061 GN=ABL_01401 PE=3 SV=1	0	20.933	27.3885	7	10	7	1	314	32.7	9.29	22.02	7
FALSE	High	Master Protein	A0A100IMC3	Nucleoside diphosphate kinase OS=Aspergillus niger OX=5061 GN=ABL_06504 PE=3 SV=1	0	20.848	26.7974	3	8	3	1	153	17	7.9	28.91	3
FALSE	High	Master Protein	A0A1M3TPR6	Protein disulfide-isomerase OS=Aspergillus luchuensis CBS 106.47 OX=1137211 GN=ASPFODRAFT_128775 PE=3 SV=1	0	20.781	16.5049	7	9	7	1	515	56.4	4.65	24.48	7
FALSE	High	Master Protein	A0A100I395	5-methyltetrahydropteroyltriglutamate-homocysteine methyltransferase OS=Aspergillus niger OX=5061 GN=ABL_00425 PE=4 SV=1	0	20.763	10.963	6	7	6	1	675	76.5	6.4	19.38	6
FALSE	High	Master Protein	A0A100IT99	Gibberellin 20-oxidase OS=Aspergillus niger OX=5061 GN=ABL_09594 PE=3 SV=1	0	20.419	22.7811	7	9	7	1	338	38.7	5.57	23.02	7
FALSE	High	Master Protein	A0A100ITY0	Prolidase PepP OS=Aspergillus niger OX=5061 GN=ABL_09893 PE=3 SV=1	0	20.214	16.9528	7	9	7	1	466	51.7	5.71	24.22	7
FALSE	High	Master Protein	A0A1M3T6Q6	Catalase OS=Aspergillus luchuensis CBS 106.47 OX=1137211 GN=ASPFODRAFT_356374 PE=3 SV=1	0	20.187	9.98703	6	6	6	1	771	86.9	6.4	19.24	6
FALSE	High	Master Protein	A0A100I6K6	Allergenic cerato-platanin Asp F13 OS=Aspergillus niger OX=5061 GN=ABL_01045 PE=4 SV=1	0	20.133	29.5302	3	12	3	1	149	15.2	4.59	38.9	3
FALSE	High	Master Protein	A0A0F4Z550	Elongation factor 1-alpha OS=Rasamsonia emersonii CBS 393.64 OX=1408163 GN=T310_0494 PE=3 SV=1	0	20.097	11.087	5	10	1	1	460	50	8.92	28.59	5
FALSE	High	Master Protein	A0A146FWN9	Carboxylic ester hydrolase OS=Aspergillus luchuensis OX=1069201 GN=RIB2604_03102720 PE=3 SV=1	0	20.094	11.7438	5	9	5	1	562	61.2	4.64	21.56	5
FALSE	High	Master Protein	A0A100IEJ2	Metallopeptidase MepB OS=Aspergillus niger OX=5061 GN=ABL_03327 PE=3 SV=1	0	20.053	6.99523	8	8	8	1	1258	142.6	7.24	20.46	8
FALSE	High	Master Protein	A2R2W0	Aspergillus niger contig An14c0100, genomic contig OS=Aspergillus niger (strain CBS 513.88 / FGSC A1513) OX=425011 GN=An14g02140 PE=4 SV=1	0	20.016	31.8681	2	7	2	1	91	10.6	5.2	18.37	2
FALSE	High	Master Protein	A0A146F611	Exo-beta-1,3-glucanase OS=Aspergillus luchuensis OX=1069201 GN=RIB2604_01003980 PE=3 SV=1	0	19.914	15.8654	5	5	5	1	416	45.5	5.25	14.46	5
FALSE	High	Master Protein	A0A146FPX6	Similar to An09g05330 OS=Aspergillus luchuensis OX=1069201 GN=RIB2604_02301530 PE=4 SV=1	0	19.907	20.339	3	13	3	1	177	19.4	5.41	39.1	3
FALSE	High	Master Protein	A0A146FNL2	Cysteine protease OS=Aspergillus luchuensis OX=1069201 GN=RIB2604_02112780 PE=4 SV=1	0	19.868	13.2554	5	7	5	1	513	57.8	6.62	16.75	5
FALSE	High	Master Protein	A0A146FKD4	Zinc-containing alcohol dehydrogenase OS=Aspergillus luchuensis OX=1069201 GN=RIB2604_02002700 PE=4 SV=1	0	19.832	16.1383	4	5	4	1	347	37.4	6.73	13.29	4
FALSE	High	Master Protein	A0A2I1DDI3	Plasma membrane ATPase OS=Aspergillus campestris IBT 28561 OX=1392248 GN=P168DRAFT_286107 PE=3 SV=1	0	19.773	7.25806	6	9	6	1	992	108.8	5.07	20.09	6
FALSE	High	Master Protein	A0A1L9UCP6	Uncharacterized protein OS=Aspergillus brasiliensis CBS 101740 OX=767769 GN=ASPBRDRAFT_131528 PE=4 SV=1	0	19.703	28.2946	6	7	6	1	258	27.3	5.74	15.81	6
FALSE	High	Master Protein	A0A0S7E593	Obg-like ATPase 1 OS=Aspergillus lentulus OX=293939 GN=ALT_8263 PE=3 SV=1	0	19.617	3.79581	5	6	5	1	1528	166.2	7.94	16.78	5
FALSE	High	Master Protein	A0A146FDH1	Methionine synthase, vitamin-B12 independent OS=Aspergillus luchuensis OX=1069201 GN=RIB2604_01706620 PE=4 SV=1	0	19.542	20.1493	7	7	7	1	402	45.3	5.48	19.63	7
FALSE	High	Master Protein	A0A146FQ17	Ketol-acid reductoisomerase, mitochondrial OS=Aspergillus luchuensis OX=1069201 GN=RIB2604_02301830 PE=3 SV=1	0	19.384	11.9701	4	7	4	1	401	44.6	8.7	14.4	4
FALSE	High	Master Protein	A0A100IK79	Oxidoreductase OS=Aspergillus niger OX=5061 GN=ABL_05412 PE=4 SV=1	0	19.111	8.83797	4	5	4	1	611	65.1	6.73	15.72	4
FALSE	High	Master Protein	A0A1L9MWS5	Uncharacterized protein OS=Aspergillus tubingensis CBS 134.48 OX=767770 GN=ASPTUDRAFT_32878 PE=4 SV=1	0	19.061	14.2857	4	8	4	1	350	37.6	9.44	26.58	4
FALSE	High	Master Protein	A0A1M3T9U5	Adenylate kinase OS=Aspergillus luchuensis CBS 106.47 OX=1137211 GN=ADK1 PE=3 SV=1	0	18.856	15.5039	3	5	3	1	258	28.6	8.22	18.88	3
FALSE	High	Master Protein	A0A1L9N920	Isocitrate dehydrogenase [NADP] OS=Aspergillus tubingensis CBS 134.48 OX=767770 GN=ASPTUDRAFT_42052 PE=3 SV=1	0	18.728	15.0602	7	14	7	1	498	55.5	8.38	33.37	7
FALSE	High	Master Protein	A0A124BXP8	Succinate--CoA ligase [ADP-forming] subunit beta, mitochondrial OS=Aspergillus niger OX=5061 GN=ABL_05747 PE=3 SV=1	0	18.687	16.4786	6	6	6	1	443	47.6	6.02	16.62	6
FALSE	High	Master Protein	A0A117E2E5	Beta-glucosidase OS=Aspergillus niger OX=5061 GN=ABL_08131 PE=3 SV=1	0	18.55	1.6138	5	6	5	1	3594	397.2	7.01	14.98	5
FALSE	High	Master Protein	A0A100I4E3	Mannitol-1-phosphate 5-dehydrogenase OS=Aspergillus niger OX=5061 GN=ABL_00738 PE=3 SV=1	0	18.379	21.9072	8	13	8	1	388	43.2	5.62	26.2	8
FALSE	High	Master Protein	A0A146FSK2	Aflatoxin B1-aldehyde reductase GliO-like OS=Aspergillus luchuensis OX=1069201 GN=RIB2604_02602170 PE=4 SV=1	0	18.373	23.4286	7	9	7	1	350	39.3	6.2	25.11	7
FALSE	High	Master Protein	A0A146G0J4	Actin-bundling protein Sac6 OS=Aspergillus luchuensis OX=1069201 GN=RIB2604_03303930 PE=4 SV=1	0	18.13	11.4826	7	7	7	1	688	77.4	6.33	14.51	7
FALSE	High	Master Protein	A0A100IND6	HAD superfamily hydrolase OS=Aspergillus niger OX=5061 GN=ABL_06801 PE=4 SV=1	0	18.112	16.3934	5	5	5	1	244	27.1	5.15	13.98	5
FALSE	High	Master Protein	A0A146F124	Dihydrolipoyl dehydrogenase OS=Aspergillus luchuensis OX=1069201 GN=RIB2604_00605780 PE=3 SV=1	0	18.029	13.6187	6	7	6	1	514	54.9	8.06	20.92	6
FALSE	High	Master Protein	A0A100IL95	Protein GCY OS=Aspergillus niger OX=5061 GN=ABL_05949 PE=4 SV=1	0	18.021	19.7492	5	5	5	1	319	34.8	7.11	13.75	5
FALSE	High	Master Protein	G7X936	Mitochondrial dihydroxy acid dehydratase OS=Aspergillus kawachii (strain NBRC 4308) OX=1033177 GN=AKAW_01534 PE=3 SV=1	0	17.884	11.0197	5	5	5	1	608	64.6	6.92	13.01	5
FALSE	High	Master Protein	A0A146G015	Short chain type dehydrogenase OS=Aspergillus luchuensis OX=1069201 GN=RIB2604_03800380 PE=4 SV=1	0	17.882	30.9963	6	7	6	1	271	28.7	6.68	15.81	6
FALSE	High	Master Protein	A0A100II52	Flavin-binding monooxygenase OS=Aspergillus niger OX=5061 GN=ABL_04330 PE=4 SV=1	0	17.802	7.26846	5	6	5	1	853	95.5	8.37	15.92	5
FALSE	High	Master Protein	A0A117DZF6	ER to Golgi transport protein Yif1 OS=Aspergillus niger OX=5061 GN=ABL_03897 PE=4 SV=1	0	17.722	8.92857	4	8	4	1	560	62.6	9.77	20.19	4
FALSE	High	Master Protein	A0A1M3TXL1	Uncharacterized protein OS=Aspergillus luchuensis CBS 106.47 OX=1137211 GN=ASPFODRAFT_41929 PE=4 SV=1	0	17.721	13.0064	5	7	5	1	469	50.6	8.91	7.1	5
FALSE	High	Master Protein	A0A1M3TXS5	Uncharacterized protein OS=Aspergillus luchuensis CBS 106.47 OX=1137211 GN=ASPFODRAFT_57604 PE=4 SV=1	0	17.716	14.2424	4	5	4	1	330	36.8	5.1	15.93	4
FALSE	High	Master Protein	A0A146FTM1	Uncharacterized protein OS=Aspergillus luchuensis OX=1069201 GN=RIB2604_02604530 PE=4 SV=1	0	17.651	29.8643	6	10	6	1	221	25.2	6.57	27.89	6
FALSE	High	Master Protein	A0A1S9DDI7	50S ribosomal protein L30e OS=Aspergillus oryzae OX=5062 GN=OAory_01093700 PE=3 SV=1	0	17.633	14.7849	4	6	3	1	372	41.4	10.26	17.34	4
FALSE	High	Master Protein	A0A1L9MVS8	Uncharacterized protein OS=Aspergillus tubingensis CBS 134.48 OX=767770 GN=ASPTUDRAFT_193047 PE=3 SV=1	0	17.516	16.9014	5	6	5	1	355	38.8	5.68	13.23	5
FALSE	High	Master Protein	A0A1L9U8G9	S-(hydroxymethyl)glutathione dehydrogenase OS=Aspergillus brasiliensis CBS 101740 OX=767769 GN=ASPBRDRAFT_33715 PE=3 SV=1	0	17.364	10.8179	4	7	1	1	379	39.8	7.05	23.42	4
FALSE	High	Master Protein	A0A2G7FQJ0	RNP domain protein OS=Aspergillus arachidicola OX=656916 GN=AARAC_011948 PE=4 SV=1	0	17.269	11.6564	4	4	4	1	489	52.4	9.16	10.03	4
FALSE	High	Master Protein	Q2UES3	Proteasome subunit alpha type OS=Aspergillus oryzae (strain ATCC 42149 / RIB 40) OX=510516 GN=AO090026000504 PE=3 SV=1	0	17.148	16.5414	3	4	3	1	266	29.3	4.88	14.08	3
FALSE	High	Master Protein	A0A1M3U060	Glycoside hydrolase family 78 protein OS=Aspergillus luchuensis CBS 106.47 OX=1137211 GN=ASPFODRAFT_202200 PE=4 SV=1	0	17.095	6.41221	3	5	3	1	655	70.2	5.35	15.17	3
FALSE	High	Master Protein	A0A146FMX0	Uncharacterized protein OS=Aspergillus luchuensis OX=1069201 GN=RIB2604_02108310 PE=4 SV=1	0	17	26.1261	4	4	4	1	222	24.3	4.93	11.54	4
FALSE	High	Master Protein	A0A100IJW1	Thiamine thiazole synthase OS=Aspergillus niger OX=5061 GN=ABL_04732 PE=3 SV=1	0	16.907	15.4079	4	5	4	1	331	35.5	5.69	13.55	4
FALSE	High	Master Protein	A0A1L9MS34	Citrate synthase OS=Aspergillus tubingensis CBS 134.48 OX=767770 GN=ASPTUDRAFT_194625 PE=3 SV=1	0	16.84	15.2688	6	6	6	1	465	51.3	8.66	15.42	6
FALSE	High	Master Protein	A0A146FF54	Sec14 cytosolic factor OS=Aspergillus luchuensis OX=1069201 GN=RIB2604_01802550 PE=4 SV=1	0	16.826	21.1356	6	6	6	1	317	35.5	5.5	14.14	6
FALSE	High	Master Protein	A0A146FIB9	Uncharacterized protein OS=Aspergillus luchuensis OX=1069201 GN=RIB2604_02002970 PE=4 SV=1	0	16.815	28.7879	4	5	4	1	198	19.9	8.78	13.02	4
FALSE	High	Master Protein	A0A1M3T1H7	Uncharacterized protein OS=Aspergillus luchuensis CBS 106.47 OX=1137211 GN=ASPFODRAFT_200165 PE=4 SV=1	0	16.814	18.2156	5	5	1	1	269	30	4.87	14.72	5
FALSE	High	Master Protein	A0A117DZU9	Elongation factor 1-beta OS=Aspergillus niger OX=5061 GN=ABL_04301 PE=3 SV=1	0	16.806	10	3	4	3	1	330	36.3	4.81	12.3	3
FALSE	High	Master Protein	Q5BDV6	Uncharacterized protein OS=Emericella nidulans (strain FGSC A4 / ATCC 38163 / CBS 112.46 / NRRL 194 / M139) OX=227321 GN=AN1274.2 PE=4 SV=1	0	16.803	6.26741	4	7	1	1	718	78.7	8.43	19.79	4
FALSE	High	Master Protein	G3Y6L1	Uncharacterized protein OS=Aspergillus niger (strain ATCC 1015 / CBS 113.46 / FGSC A1144 / LSHB Ac4 / NCTC 3858a / NRRL 328 / USDA 3528.7) OX=380704 GN=ASPNIDRAFT_45588 PE=4 SV=1	0	16.803	5.72519	2	3	2	1	262	27.7	4.86	13.71	2
FALSE	High	Master Protein	A0A1M3TFL3	Uncharacterized protein OS=Aspergillus luchuensis CBS 106.47 OX=1137211 GN=ASPFODRAFT_138103 PE=4 SV=1	0	16.769	15.2137	7	9	7	1	585	66.1	7.84	20.16	7
FALSE	High	Master Protein	A0A100ISN4	Similar to An16g01890 OS=Aspergillus niger OX=5061 GN=ABL_09270 PE=4 SV=1	0	16.75	6.5625	3	5	3	1	640	70.4	5.59	16.96	3
FALSE	High	Master Protein	A0A100IPM5	Orotidine 5'-phosphate decarboxylase OS=Aspergillus niger OX=5061 GN=ABL_07721 PE=3 SV=1	0	16.553	20.5776	4	4	4	1	277	30.1	6.7	10.81	4
FALSE	High	Master Protein	A0A146FSU8	60S ribosomal protein L5 OS=Aspergillus luchuensis OX=1069201 GN=RIB2604_02601580 PE=3 SV=1	0	16.465	9.88701	3	6	3	1	354	40.2	8.92	16.53	3
FALSE	High	Master Protein	G3Y8M6	Uncharacterized protein OS=Aspergillus niger (strain ATCC 1015 / CBS 113.46 / FGSC A1144 / LSHB Ac4 / NCTC 3858a / NRRL 328 / USDA 3528.7) OX=380704 GN=ASPNIDRAFT_203639 PE=4 SV=1	0	16.399	4.58891	6	7	6	1	1569	171.4	5.96	16.38	6
FALSE	High	Master Protein	G7XIZ6	Exo-beta-1,3-glucanase OS=Aspergillus kawachii (strain NBRC 4308) OX=1033177 GN=AKAW_04805 PE=4 SV=1	0	16.287	4.09234	3	15	3	1	953	100.1	4.7	41.48	3
FALSE	High	Master Protein	A0A1L9UHR9	Uncharacterized protein OS=Aspergillus brasiliensis CBS 101740 OX=767769 GN=ASPBRDRAFT_44112 PE=4 SV=1	0	16.267	18.9189	5	9	5	1	222	24.6	5.64	25.18	5
FALSE	High	Master Protein	A0A1L9NG99	Uncharacterized protein OS=Aspergillus tubingensis CBS 134.48 OX=767770 GN=ASPTUDRAFT_51203 PE=3 SV=1	0	16.121	9.88372	4	5	4	1	516	55.9	6.64	16.91	4
FALSE	High	Master Protein	A0A0S7E2T9	60S ribosomal protein L25 OS=Aspergillus lentulus OX=293939 GN=ALT_6362 PE=3 SV=1	0	16.091	30.5195	4	8	4	1	154	17	10.42	23.98	4
FALSE	High	Master Protein	A0A100I8N1	1,3-beta-glucanosyltransferase OS=Aspergillus niger OX=5061 GN=ABL_01828 PE=3 SV=1	0	16.09	10.0189	4	7	4	1	529	56.8	4.78	20.08	4
FALSE	High	Master Protein	A0A1R3RZW1	40S ribosomal protein S0 OS=Aspergillus carbonarius (strain ITEM 5010) OX=602072 GN=RPS0 PE=3 SV=1	0	16.079	16.7224	4	7	4	1	299	32.1	4.97	19.05	4
FALSE	High	Master Protein	A0A100IKY5	Oxidoreductase, short chain dehydrogenase/reductase family protein OS=Aspergillus niger OX=5061 GN=ABL_05790 PE=4 SV=1	0	16.038	23.9216	4	6	4	1	255	26.8	6.64	15.17	4
FALSE	High	Master Protein	B0XTP8	Histone H4 OS=Neosartorya fumigata (strain CEA10 / CBS 144.89 / FGSC A1163) OX=451804 GN=AFUB_029490 PE=3 SV=1	0	15.837	22.5352	3	9	2	1	142	15.8	10.21	22.14	3
FALSE	High	Master Protein	A0A1L9NNX3	Isocitrate dehydrogenase [NAD] subunit, mitochondrial OS=Aspergillus tubingensis CBS 134.48 OX=767770 GN=ASPTUDRAFT_72702 PE=3 SV=1	0	15.818	16.8798	6	7	6	1	391	42.4	8.25	19.86	6
FALSE	High	Master Protein	A0A1L9U6A5	Uncharacterized protein OS=Aspergillus brasiliensis CBS 101740 OX=767769 GN=ASPBRDRAFT_210969 PE=4 SV=1	0	15.807	16.9951	5	5	5	1	406	44	8.21	12.04	5
FALSE	High	Master Protein	A0A100IK03	Beta-galactosidase OS=Aspergillus niger OX=5061 GN=ABL_05321 PE=3 SV=1	0	15.758	6.02527	5	5	5	1	1029	113.4	5.1	9.51	5
FALSE	High	Master Protein	A0A100IS80	FAD binding oxidoreductase OS=Aspergillus niger OX=5061 GN=ABL_08976 PE=3 SV=1	0	15.732	9.3617	4	5	4	1	470	51.4	6.55	14.51	4
FALSE	High	Master Protein	A0A1L9MW74	Uncharacterized protein OS=Aspergillus tubingensis CBS 134.48 OX=767770 GN=ASPTUDRAFT_128889 PE=3 SV=1	0	15.608	11.4964	5	5	5	1	548	59	6.81	12.03	5
FALSE	High	Master Protein	A0A117DYJ9	Signal transduction protein Syg1 OS=Aspergillus niger OX=5061 GN=ABL_03206 PE=4 SV=1	0	15.591	1.08794	1	7	1	1	1103	125.8	8.85	16.75	1
FALSE	High	Master Protein	A0A100ITA7	Uncharacterized protein OS=Aspergillus niger OX=5061 GN=ABL_09597 PE=4 SV=1	0	15.581	37.0079	5	5	1	1	127	14.5	6.32	14.79	5
FALSE	High	Master Protein	A0A1M3TRE2	Uncharacterized protein OS=Aspergillus luchuensis CBS 106.47 OX=1137211 GN=ASPFODRAFT_127725 PE=4 SV=1	0	15.555	12.9699	6	6	6	1	532	59.3	6.76	14.67	6
FALSE	High	Master Protein	A0A146EY76	Uncharacterized protein OS=Aspergillus luchuensis OX=1069201 GN=RIB2604_00100650 PE=4 SV=1	0	15.498	33.6538	2	4	2	1	104	10.8	5.94	11.45	2
FALSE	High	Master Protein	A0A1M3TBQ3	60S ribosomal protein L13 OS=Aspergillus luchuensis CBS 106.47 OX=1137211 GN=ASPFODRAFT_208713 PE=3 SV=1	0	15.497	7.93651	5	5	5	1	693	76.9	9.99	15.79	5
FALSE	High	Master Protein	G3XN08	UDP-glucose 4-epimerase OS=Aspergillus niger (strain ATCC 1015 / CBS 113.46 / FGSC A1144 / LSHB Ac4 / NCTC 3858a / NRRL 328 / USDA 3528.7) OX=380704 GN=ASPNIDRAFT_56583 PE=3 SV=1	0	15.44	7.1618	3	3	3	1	377	41.2	6.19	9.79	3
FALSE	High	Master Protein	A0A100I7Y3	3-isopropylmalate dehydrogenase OS=Aspergillus niger OX=5061 GN=ABL_01363 PE=3 SV=1	0	15.395	19.4521	5	5	5	1	365	38.8	5.58	14.56	5
FALSE	High	Master Protein	A0A117E2I1	Dienelactone hydrolase family protein OS=Aspergillus niger OX=5061 GN=ABL_08284 PE=4 SV=1	0	15.366	27.8884	7	8	7	1	251	27.5	6.9	19.38	7
FALSE	High	Master Protein	A0A100INZ0	Rho GDP-dissociation inhibitor OS=Aspergillus niger OX=5061 GN=ABL_07042 PE=4 SV=1	0	15.338	16.2437	2	3	2	1	197	22.3	5.48	9.66	2
FALSE	High	Master Protein	A0A146FWE3	Saponin hydrolase OS=Aspergillus luchuensis OX=1069201 GN=RIB2604_03300260 PE=4 SV=1	0	15.318	8.00543	4	4	4	1	737	79.4	6.32	14.12	4
FALSE	High	Master Protein	A0A100IRN4	Asparaginyl-tRNA synthetase OS=Aspergillus niger OX=5061 GN=ABL_08760 PE=4 SV=1	0	15.285	10.9756	5	6	5	1	574	64.9	6.19	11.47	5
FALSE	High	Master Protein	A0A254UAR6	Eukaryotic translation initiation factor 3 subunit M OS=Aspergillus niger OX=5061 GN=CAN33_10595 PE=3 SV=1	0	15.267	8.9172	5	6	5	1	628	66.8	4.88	13.79	5
FALSE	High	Master Protein	A0A117E187	Alpha-xylosidase OS=Aspergillus niger OX=5061 GN=ABL_06329 PE=3 SV=1	0	15.21	10.3261	6	6	6	1	736	82.4	5.55	12.01	6
FALSE	High	Master Protein	A0A124BX67	Hsc70 cochaperone OS=Aspergillus niger OX=5061 GN=ABL_04175 PE=4 SV=1	0	15.156	20.7602	5	5	5	1	342	35.4	5.06	10.97	5
FALSE	High	Master Protein	A0A2P2HI43	Solute carrier family 25 member 42 OS=Aspergillus flavus (strain ATCC MYA-384 / AF70) OX=1392242 GN=AFLA70_385g000940 PE=3 SV=1	0	15.121	8.18182	4	8	4	1	550	60.3	10.61	24.48	4
FALSE	High	Master Protein	A0A254TXY2	Uncharacterized protein OS=Aspergillus niger OX=5061 GN=CAN33_39795 PE=4 SV=1	0	15.098	17.7165	4	9	4	1	254	28	7.85	26.53	4
FALSE	High	Master Protein	A0A1L9UWJ4	Homoserine dehydrogenase OS=Aspergillus brasiliensis CBS 101740 OX=767769 GN=ASPBRDRAFT_38465 PE=3 SV=1	0	15.078	17.2507	6	7	6	1	371	39	5.38	14.47	6
FALSE	High	Master Protein	A1CD39	Glyceraldehyde-3-phosphate dehydrogenase OS=Aspergillus clavatus (strain ATCC 1007 / CBS 513.65 / DSM 816 / NCTC 3887 / NRRL 1) OX=344612 GN=ACLA_064170 PE=3 SV=1	0	14.943	11.276	3	6	1	1	337	36.7	7.15	20.51	3
FALSE	High	Master Protein	A0A229YET8	Uncharacterized protein OS=Aspergillus turcosus OX=1245748 GN=CDV55_09895 PE=4 SV=1	0	14.897	8.70406	4	8	4	1	517	56.8	9.85	21.9	4
FALSE	High	Master Protein	A0A100IQ98	UV excision repair protein OS=Aspergillus niger OX=5061 GN=ABL_08036 PE=4 SV=1	0	14.852	11.1111	3	3	3	1	369	39.5	4.56	9.92	3
FALSE	High	Master Protein	A0A146FTF8	Oxidoreductase, short chain dehydrogenase/reductase family OS=Aspergillus luchuensis OX=1069201 GN=RIB2604_02604030 PE=4 SV=1	0	14.848	20.1521	4	6	4	1	263	28.3	5.48	15.82	4
FALSE	High	Master Protein	A0A100INX9	Sulfate adenylyltransferase OS=Aspergillus niger OX=5061 GN=MET3 PE=3 SV=1	0	14.828	12.1951	6	6	6	1	574	63.9	7.21	16.2	6
FALSE	High	Master Protein	A0A117DZM2	S-formylglutathione hydrolase OS=Aspergillus niger OX=5061 GN=ABL_03245 PE=3 SV=1	0	14.797	19.0972	5	5	5	1	288	31.6	6.54	12.74	5
FALSE	High	Master Protein	A0A1M3TH29	Uncharacterized protein OS=Aspergillus luchuensis CBS 106.47 OX=1137211 GN=ASPFODRAFT_718648 PE=4 SV=1	0	14.793	10.2334	5	6	5	1	557	61.8	7.93	16.13	5
FALSE	High	Master Protein	G7XEC8	DJ-1/PfpI family protein OS=Aspergillus kawachii (strain NBRC 4308) OX=1033177 GN=AKAW_03621 PE=4 SV=1	0	14.762	12.9278	3	9	3	1	263	28.4	5.66	23.09	3
FALSE	High	Master Protein	G7XXP6	Transcription factor RfeF OS=Aspergillus kawachii (strain NBRC 4308) OX=1033177 GN=AKAW_09858 PE=4 SV=1	0	14.757	9.28793	5	5	5	1	646	67.4	5.83	13.65	5
FALSE	High	Master Protein	A0A1M3TT87	Histidine biosynthesis trifunctional protein OS=Aspergillus luchuensis CBS 106.47 OX=1137211 GN=ASPFODRAFT_30657 PE=3 SV=1	0	14.746	8.17972	6	6	6	1	868	92.5	5.71	13.89	6
FALSE	High	Master Protein	A0A100IQV6	Fumarate hydratase OS=Aspergillus niger OX=5061 GN=ABL_08348 PE=3 SV=1	0	14.714	4.9505	4	6	4	1	909	99.7	7.21	15.58	4
FALSE	High	Master Protein	A0A1M3TLT4	Uncharacterized protein OS=Aspergillus luchuensis CBS 106.47 OX=1137211 GN=ASPFODRAFT_32278 PE=4 SV=1	0	14.652	30.1075	4	5	4	1	186	20.8	4.78	13.8	4
FALSE	High	Master Protein	A0A1M3TM85	Glycoside hydrolase family 125 protein OS=Aspergillus luchuensis CBS 106.47 OX=1137211 GN=ASPFODRAFT_206585 PE=4 SV=1	0	14.614	9.14179	4	5	4	1	536	58.9	5.31	13.46	4
FALSE	High	Master Protein	A0A100IKP8	Eukaryotic translation initiation factor 3 subunit C OS=Aspergillus niger OX=5061 GN=NIP1 PE=3 SV=1	0	14.601	6.25	4	4	4	1	864	97.6	5.38	11.14	4
FALSE	High	Master Protein	A0A117E4K6	Short chain dehydrogenase/reductase family OS=Aspergillus niger OX=5061 GN=ABL_09513 PE=3 SV=1	0	14.565	8.16327	2	6	2	1	294	31.5	5.9	16.35	2
FALSE	High	Master Protein	A0A1L9SRF8	S-adenosylmethionine synthase OS=Penicilliopsis zonata CBS 506.65 OX=1073090 GN=ASPZODRAFT_128203 PE=3 SV=1	0	14.53	13.3721	4	6	2	1	344	38	7.25	16.78	4
FALSE	High	Master Protein	A0A1L9NPD9	Uncharacterized protein OS=Aspergillus tubingensis CBS 134.48 OX=767770 GN=ASPTUDRAFT_52810 PE=4 SV=1	0	14.366	32.3944	4	4	4	1	142	15.5	6.39	11.77	4
FALSE	High	Master Protein	A0A146FIA4	Peptidyl-prolyl cis-trans isomerase OS=Aspergillus luchuensis OX=1069201 GN=RIB2604_02002020 PE=3 SV=1	0	14.313	16.3265	4	4	4	1	294	32.5	6.81	10.99	4
FALSE	High	Master Protein	A0A146FIC4	Alpha-galactosidase OS=Aspergillus luchuensis OX=1069201 GN=RIB2604_01901850 PE=3 SV=1	0	14.303	7.33652	4	5	4	1	627	67.7	4.86	13.73	4
FALSE	High	Master Protein	G7XFX3	Glutaminase OS=Aspergillus kawachii (strain NBRC 4308) OX=1033177 GN=AKAW_04012 PE=4 SV=1	0	14.268	6.5097	4	6	1	1	722	79.5	5.88	13.42	4
FALSE	High	Master Protein	G7X9B2	Uncharacterized protein OS=Aspergillus kawachii (strain NBRC 4308) OX=1033177 GN=AKAW_01645 PE=4 SV=1	0	14.18	14.4144	1	2	1	1	111	12.2	4.09	8.38	1
FALSE	High	Master Protein	A0A2V5HFP6	40S ribosomal protein S2 OS=Aspergillus violaceofuscus CBS 115571 OX=1450538 GN=BO99DRAFT_402145 PE=4 SV=1	0	14.146	21.9231	4	4	4	1	260	28.3	10.46	10.03	4
FALSE	High	Master Protein	A0A117E1Y9	ATP-dependent RNA helicase chl1 OS=Aspergillus niger OX=5061 GN=ABL_07444 PE=3 SV=1	0	14.14	3.02457	3	5	3	1	1058	119.4	8.9	11.99	3
FALSE	High	Master Protein	A0A1M3T3A7	Glycoside hydrolase family 17 protein OS=Aspergillus luchuensis CBS 106.47 OX=1137211 GN=ASPFODRAFT_211928 PE=4 SV=1	0	14.11	13.9344	4	6	4	1	366	39.5	6.55	16.71	4
FALSE	High	Master Protein	A0A254TV92	Proteasome endopeptidase complex OS=Aspergillus niger OX=5061 GN=CAN33_53195 PE=3 SV=1	0	14.107	13.0064	6	7	6	1	469	51.9	8.53	16.16	6
FALSE	High	Master Protein	A0A1L9MSB3	Malate synthase OS=Aspergillus tubingensis CBS 134.48 OX=767770 GN=ASPTUDRAFT_48566 PE=3 SV=1	0	14.071	9.40959	4	5	4	1	542	61.1	7.44	9.28	4
FALSE	High	Master Protein	A0A1M3TBD5	Arabinogalactan endo-beta-1,4-galactanase OS=Aspergillus luchuensis CBS 106.47 OX=1137211 GN=ASPFODRAFT_49559 PE=3 SV=1	0	14.04	8.75706	3	5	3	1	354	39.2	4.11	16.21	3
FALSE	High	Master Protein	A0A146FMI6	3-isopropylmalate dehydrogenase OS=Aspergillus luchuensis OX=1069201 GN=RIB2604_02008930 PE=3 SV=1	0	14.026	19.0104	6	7	6	1	384	41.9	5.26	13.86	6
FALSE	High	Master Protein	G7XD23	Quinone oxidoreductase OS=Aspergillus kawachii (strain NBRC 4308) OX=1033177 GN=AKAW_02809 PE=4 SV=1	0	13.896	16.7139	5	5	5	1	353	38.2	6.8	13.73	5
FALSE	High	Master Protein	A0A1M3TTZ1	Glycoside hydrolase family 132 protein OS=Aspergillus luchuensis CBS 106.47 OX=1137211 GN=ASPFODRAFT_40701 PE=4 SV=1	0	13.851	13.1765	4	6	4	1	425	44.3	5.29	15.27	4
FALSE	High	Master Protein	A0A146F023	Uncharacterized protein OS=Aspergillus luchuensis OX=1069201 GN=RIB2604_00400830 PE=4 SV=1	0	13.843	12.1212	4	4	4	1	561	58.5	6.83	9.28	4
FALSE	High	Master Protein	A0A1L9MZ71	Pyruvate kinase OS=Aspergillus tubingensis CBS 134.48 OX=767770 GN=ASPTUDRAFT_77487 PE=3 SV=1	0	13.766	14.0684	7	8	7	1	526	58.1	7.25	17.66	7
FALSE	High	Master Protein	A0A100IR24	NAD binding Rossmann fold oxidoreductase OS=Aspergillus niger OX=5061 GN=ABL_08152 PE=4 SV=1	0	13.741	13.8889	4	4	4	1	360	40	7.08	14.2	4
FALSE	High	Master Protein	A0A1M3TA46	Uncharacterized protein OS=Aspergillus luchuensis CBS 106.47 OX=1137211 GN=ASPFODRAFT_83090 PE=4 SV=1	0	13.723	1.9573	7	8	7	1	3934	430.6	6.29	12.87	7
FALSE	High	Master Protein	A0A146FC27	Superoxide dismutase OS=Aspergillus luchuensis OX=1069201 GN=RIB2604_01703370 PE=3 SV=1	0	13.649	26.1905	5	9	5	1	210	23.8	6.52	22.8	5
FALSE	High	Master Protein	A0A1M3TGM5	Glycoside hydrolase family 43 protein OS=Aspergillus luchuensis CBS 106.47 OX=1137211 GN=ASPFODRAFT_136217 PE=3 SV=1	0	13.64	13.9394	3	5	3	1	330	35.9	5	17.09	3
FALSE	High	Master Protein	G7XGV7	Transaldolase OS=Aspergillus kawachii (strain NBRC 4308) OX=1033177 GN=AKAW_04280 PE=4 SV=1	0	13.618	13.5135	4	4	4	1	333	36.4	6.27	11.84	4
FALSE	High	Master Protein	A0A146F605	Uncharacterized protein OS=Aspergillus luchuensis OX=1069201 GN=RIB2604_00901220 PE=4 SV=1	0	13.485	39.7849	3	4	3	1	93	10.7	6.92	11.06	3
FALSE	High	Master Protein	A0A1L9NQJ9	Uncharacterized protein OS=Aspergillus tubingensis CBS 134.48 OX=767770 GN=ASPTUDRAFT_27003 PE=4 SV=1	0	13.392	16.5644	2	4	2	1	163	17.2	4.96	12.47	2
FALSE	High	Master Protein	A0A146F8D9	Beta-glucosidase OS=Aspergillus luchuensis OX=1069201 GN=RIB2604_01500380 PE=4 SV=1	0	13.277	6.79739	5	7	5	1	765	82.1	4.79	16.52	5
FALSE	High	Master Protein	A0A1M3T619	Uncharacterized protein OS=Aspergillus luchuensis CBS 106.47 OX=1137211 GN=ASPFODRAFT_51031 PE=4 SV=1	0	13.276	18.3486	5	5	5	1	327	36.1	6.06	12.38	5
FALSE	High	Master Protein	A0A1L9UT68	Peptidylprolyl isomerase OS=Aspergillus brasiliensis CBS 101740 OX=767769 GN=ASPBRDRAFT_463782 PE=4 SV=1	0	13.27	29.2857	3	5	3	1	140	14.9	6.3	10.38	3
FALSE	High	Master Protein	A0A100IMW6	Uncharacterized protein OS=Aspergillus niger OX=5061 GN=ABL_06780 PE=3 SV=1	0	13.253	2.21339	3	4	3	1	1762	195.3	5.83	11.17	3
FALSE	High	Master Protein	A0A1L9UGR1	Uncharacterized protein OS=Aspergillus brasiliensis CBS 101740 OX=767769 GN=ASPBRDRAFT_196370 PE=4 SV=1	0	13.225	25.5319	3	4	3	1	141	15.3	5.19	8.57	3
FALSE	High	Master Protein	A0A117DVB7	ATP synthase oligomycin sensitivity conferral protein OS=Aspergillus niger OX=5061 GN=ABL_00820 PE=3 SV=1	0	13.198	26.3158	6	8	6	1	228	24.2	9.48	20.39	6
FALSE	High	Master Protein	A2QIU5	Aspergillus niger contig An04c0140, genomic contig OS=Aspergillus niger (strain CBS 513.88 / FGSC A1513) OX=425011 GN=An04g04750 PE=4 SV=1	0	13.112	5.49763	4	5	4	1	1055	118.4	6.8	14.06	4
FALSE	High	Master Protein	A0A1L9UB71	Uncharacterized protein OS=Aspergillus brasiliensis CBS 101740 OX=767769 GN=ASPBRDRAFT_184765 PE=3 SV=1	0	13.071	9.59184	4	6	4	1	490	53.5	6.05	14.56	4
FALSE	High	Master Protein	G3XN35	Uncharacterized protein OS=Aspergillus niger (strain ATCC 1015 / CBS 113.46 / FGSC A1144 / LSHB Ac4 / NCTC 3858a / NRRL 328 / USDA 3528.7) OX=380704 GN=ASPNIDRAFT_49373 PE=4 SV=1	0	13.07	11.3712	4	5	4	1	299	29.6	4.96	12.24	4
FALSE	High	Master Protein	A0A1M3T246	Lactoylglutathione lyase OS=Aspergillus luchuensis CBS 106.47 OX=1137211 GN=ASPFODRAFT_52486 PE=3 SV=1	0	13.068	10.0287	3	4	3	1	349	40	6.86	11.5	3
FALSE	High	Master Protein	A0A146FCM0	Succinate dehydrogenase [ubiquinone] flavoprotein subunit, mitochondrial OS=Aspergillus luchuensis OX=1069201 GN=RIB2604_01710970 PE=3 SV=1	0	13.053	7.04846	4	4	3	1	681	75.2	6.55	10.9	4
FALSE	High	Master Protein	A0A1L9UWK4	Uncharacterized protein OS=Aspergillus brasiliensis CBS 101740 OX=767769 GN=ASPBRDRAFT_51745 PE=3 SV=1	0	13.021	4.16263	4	4	4	1	1033	115	7.42	12.27	4
FALSE	High	Master Protein	A0A100IIJ3	Spermidine synthase OS=Aspergillus niger OX=5061 GN=ABL_04515 PE=3 SV=1	0	12.987	15.4088	4	4	4	1	318	36.2	5.78	11.82	4
FALSE	High	Master Protein	A0A124BYH9	Allergen Asp F3 OS=Aspergillus niger OX=5061 GN=ABL_08314 PE=4 SV=1	0	12.956	28.5714	4	4	4	1	168	18.5	5.38	12.49	4
FALSE	High	Master Protein	A0A100IA47	Bifunctional purine biosynthesis protein Ade16 OS=Aspergillus niger OX=5061 GN=ABL_02161 PE=3 SV=1	0	12.826	6.93277	6	6	6	1	952	104.6	8.24	11.4	6
FALSE	High	Master Protein	A0A1L9NCK2	ATP synthase subunit gamma OS=Aspergillus tubingensis CBS 134.48 OX=767770 GN=ASPTUDRAFT_54061 PE=3 SV=1	0	12.824	16.1616	4	4	4	1	297	32.4	7.87	7.34	4
FALSE	High	Master Protein	A0A1L9UJE3	Uncharacterized protein OS=Aspergillus brasiliensis CBS 101740 OX=767769 GN=ASPBRDRAFT_125145 PE=4 SV=1	0	12.821	11.244	4	7	4	1	418	46.2	7.33	18.33	4
FALSE	High	Master Protein	A0A100IFI2	Translation initiation factor 4B OS=Aspergillus niger OX=5061 GN=ABL_03542 PE=4 SV=1	0	12.786	12.0724	4	5	4	1	497	53.7	8.87	13.43	4
FALSE	High	Master Protein	A0A100IS87	UDP-N-acetylglucosamine pyrophosphorylase OS=Aspergillus niger OX=5061 GN=ABL_09055 PE=4 SV=1	0	12.727	9.27022	4	5	4	1	507	55.9	6.16	7.62	4
FALSE	High	Master Protein	A0A1L9MYP5	Uncharacterized protein OS=Aspergillus tubingensis CBS 134.48 OX=767770 GN=ASPTUDRAFT_67877 PE=4 SV=1	0	12.705	14.5511	4	4	4	1	323	34.9	5.74	10.61	4
FALSE	High	Master Protein	A0A1L9NE67	Uncharacterized protein OS=Aspergillus tubingensis CBS 134.48 OX=767770 GN=ASPTUDRAFT_28357 PE=4 SV=1	0	12.698	14.7059	4	4	4	1	374	40.3	7.3	10.17	4
FALSE	High	Master Protein	A0A100I669	Rab GDP dissociation inhibitor OS=Aspergillus niger OX=5061 GN=ABL_00928 PE=3 SV=1	0	12.679	6.79191	4	5	4	1	692	77.9	7.03	12.89	4
FALSE	High	Master Protein	A0A1L9NIB9	Uncharacterized protein OS=Aspergillus tubingensis CBS 134.48 OX=767770 GN=ASPTUDRAFT_133926 PE=4 SV=1	0	12.641	13.0742	3	3	3	1	283	31.5	6.32	8.9	3
FALSE	High	Master Protein	A0A0F8VLI8	Uncharacterized protein OS=Aspergillus rambellii OX=308745 GN=ARAM_005364 PE=3 SV=1	0	12.632	4.59893	3	5	3	1	935	103.4	6.51	15.1	3
FALSE	High	Master Protein	A0A1L9URF5	Glycerol-3-phosphate dehydrogenase OS=Aspergillus brasiliensis CBS 101740 OX=767769 GN=ASPBRDRAFT_122007 PE=3 SV=1	0	12.619	9.14205	6	6	6	1	711	77.8	7.23	13.51	6
FALSE	High	Master Protein	A0A1L9N527	Succinate--CoA ligase [ADP-forming] subunit alpha, mitochondrial OS=Aspergillus tubingensis CBS 134.48 OX=767770 GN=ASPTUDRAFT_43429 PE=3 SV=1	0	12.613	17.7711	4	4	4	1	332	34.5	8.81	8.68	4
FALSE	High	Master Protein	A0A1L9UUP0	Uncharacterized protein OS=Aspergillus brasiliensis CBS 101740 OX=767769 GN=ASPBRDRAFT_148194 PE=3 SV=1	0	12.581	8.19672	3	4	3	1	427	46.7	5.05	7.75	3
FALSE	High	Master Protein	G7XNL3	O-methyltransferase OS=Aspergillus kawachii (strain NBRC 4308) OX=1033177 GN=AKAW_06697 PE=4 SV=1	0	12.524	14.7343	5	5	5	1	414	46.3	6.6	11.14	5
FALSE	High	Master Protein	A0A100IMW5	Polyubiquitin binding protein OS=Aspergillus niger OX=5061 GN=ABL_06807 PE=4 SV=1	0	12.507	7.40741	5	7	5	1	783	84.3	5.29	12.73	5
FALSE	High	Master Protein	A0A124BXT9	Dihydrodipicolinate synthetase family protein OS=Aspergillus niger OX=5061 GN=ABL_06122 PE=3 SV=1	0	12.505	9.61538	2	3	2	1	312	33	6.06	6.01	2
FALSE	High	Master Protein	A0A124BVY9	Aldehyde reductase 1 OS=Aspergillus niger OX=5061 GN=ABL_02212 PE=4 SV=1	0	12.481	15.4079	4	4	4	1	331	37.8	5.85	11.77	4
FALSE	High	Master Protein	A0A146FWH8	Tubulin beta chain OS=Aspergillus luchuensis OX=1069201 GN=RIB2604_02902750 PE=3 SV=1	0	12.476	10.4213	4	6	4	1	451	50.3	5.26	14.58	4
FALSE	High	Master Protein	A0A1L9MZD3	Uncharacterized protein OS=Aspergillus tubingensis CBS 134.48 OX=767770 GN=ASPTUDRAFT_58081 PE=3 SV=1	0	12.376	10.9312	4	5	2	1	494	53.6	6.42	12.16	4
FALSE	High	Master Protein	A0A1L9N741	Beta-galactosidase OS=Aspergillus tubingensis CBS 134.48 OX=767770 GN=ASPTUDRAFT_28744 PE=3 SV=1	0	12.325	3.34975	3	3	3	1	1015	110.6	5.21	8.5	3
FALSE	High	Master Protein	A0A2P2HPR9	Pathogenesis associated protein OS=Aspergillus flavus (strain ATCC MYA-384 / AF70) OX=1392242 GN=AFLA70_459g000881 PE=4 SV=1	0	12.289	10	3	5	3	1	320	36	9.69	13.83	3
FALSE	High	Master Protein	A0A1M3U0X5	Ribosomal protein L15 OS=Aspergillus luchuensis CBS 106.47 OX=1137211 GN=ASPFODRAFT_67028 PE=3 SV=1	0	12.266	16.6667	3	4	3	1	228	26.9	11.19	10.4	3
FALSE	High	Master Protein	G7XL52	Uncharacterized protein OS=Aspergillus kawachii (strain NBRC 4308) OX=1033177 GN=AKAW_05775 PE=4 SV=1	0	12.26	29.7872	3	3	3	1	141	15	5.57	7.96	3
FALSE	High	Master Protein	A0A146F4I8	Similar to An10g00970 OS=Aspergillus luchuensis OX=1069201 GN=RIB2604_00901010 PE=4 SV=1	0	12.236	20.4444	3	4	3	1	225	23.4	4.56	11.38	3
FALSE	High	Master Protein	G7XFA2	Monooxygenase OS=Aspergillus kawachii (strain NBRC 4308) OX=1033177 GN=AKAW_03363 PE=4 SV=1	0	12.169	8.10811	3	5	3	1	444	48.5	6.61	11.96	3
FALSE	High	Master Protein	A0A1L9N524	Uncharacterized protein OS=Aspergillus tubingensis CBS 134.48 OX=767770 GN=ASPTUDRAFT_172216 PE=3 SV=1	0	12.075	10.4418	4	4	2	1	498	55.7	8.09	8.94	4
FALSE	High	Master Protein	A0A1V1FJ13	Calmodulin (Fragment) OS=Aspergillus sp. IFM 64239 OX=1904974 GN=CaM PE=4 SV=1	0	12.048	38.8889	4	5	1	1	126	14.3	4.3	13.38	4
FALSE	High	Master Protein	A0A1L9U5C9	Uncharacterized protein OS=Aspergillus brasiliensis CBS 101740 OX=767769 GN=ASPBRDRAFT_48399 PE=4 SV=1	0	11.991	13.3038	4	4	2	1	451	47.7	7.46	8.66	4
FALSE	High	Master Protein	A0A1L9MRZ7	Uncharacterized protein OS=Aspergillus tubingensis CBS 134.48 OX=767770 GN=ASPTUDRAFT_59847 PE=4 SV=1	0	11.964	16.6667	4	6	4	1	288	31.4	5.92	14.48	4
FALSE	High	Master Protein	E0WH82	Ribulose bisphosphate carboxylase large chain (Fragment) OS=Cosmarium laeve OX=328285 GN=rbcL PE=3 SV=1	0	11.883	11.2108	4	5	4	1	446	49.3	6.6	13.04	4
FALSE	High	Master Protein	A0A1L9NC44	Uncharacterized protein OS=Aspergillus tubingensis CBS 134.48 OX=767770 GN=ASPTUDRAFT_114910 PE=4 SV=1	0	11.874	7.14286	3	5	3	1	476	52.2	5.58	13.36	3
FALSE	High	Master Protein	A0A1M3TYJ1	Uncharacterized protein OS=Aspergillus luchuensis CBS 106.47 OX=1137211 GN=ASPFODRAFT_66230 PE=3 SV=1	0	11.833	9.49612	5	5	5	1	516	57.7	6.11	13.74	5
FALSE	High	Master Protein	G7XD38	Gamma-glutamylputrescine oxidoreductase OS=Aspergillus kawachii (strain NBRC 4308) OX=1033177 GN=AKAW_02824 PE=4 SV=1	0	11.799	6.67904	3	5	3	1	539	59.9	6.23	13.39	3
FALSE	High	Master Protein	A0A1L9UBG7	Uncharacterized protein OS=Aspergillus brasiliensis CBS 101740 OX=767769 GN=ASPBRDRAFT_32760 PE=4 SV=1	0	11.729	16.3435	5	5	5	1	361	38.5	5.91	11.6	5
FALSE	High	Master Protein	A0A254UAW8	Superoxide dismutase [Cu-Zn] OS=Aspergillus niger OX=5061 GN=CAN33_1470 PE=3 SV=1	0	11.722	11.7949	2	5	2	1	195	20.4	5.53	14.63	2
FALSE	High	Master Protein	A0A146FQY4	D-xylose reductase OS=Aspergillus luchuensis OX=1069201 GN=RIB2604_02110920 PE=4 SV=1	0	11.722	2.96443	1	2	1	1	506	56.4	6.49	7.24	1
FALSE	High	Master Protein	Q5B1B1	Succinyl-CoA:3-ketoacid-coenzyme A transferase OS=Emericella nidulans (strain FGSC A4 / ATCC 38163 / CBS 112.46 / NRRL 194 / M139) OX=227321 GN=AN5669.2 PE=3 SV=1	0	11.695	9.00563	4	4	3	1	533	56.8	7.64	7.35	4
FALSE	High	Master Protein	A0A124BZ06	Tubulin-specific chaperone A OS=Aspergillus niger OX=5061 GN=ABL_09844 PE=3 SV=1	0	11.635	22.0339	2	3	2	1	118	13.4	5.43	13.06	2
FALSE	High	Master Protein	A0A100IC32	Pectinesterase OS=Aspergillus niger OX=5061 GN=ABL_02685 PE=4 SV=1	0	11.579	9.78593	2	2	2	1	327	34.7	4.41	5.75	2
FALSE	High	Master Protein	A0A124BZ38	Glucose-6-phosphate 1-dehydrogenase OS=Aspergillus niger OX=5061 GN=ABL_10158 PE=3 SV=1	0	11.519	4.77555	5	6	5	1	1047	117.6	7.21	10.14	5
FALSE	High	Master Protein	A0A146F1X2	Cell wall integrity signaling protein Lsp1 OS=Aspergillus luchuensis OX=1069201 GN=RIB2604_00607600 PE=4 SV=1	0	11.477	10.7143	4	5	4	1	392	44.3	6.62	11.9	4
FALSE	High	Master Protein	A0A1L9NMZ2	Uncharacterized protein OS=Aspergillus tubingensis CBS 134.48 OX=767770 GN=ASPTUDRAFT_52434 PE=3 SV=1	0	11.472	10.643	4	4	4	1	451	48.9	4.65	9.17	4
FALSE	High	Master Protein	A0A2G7FI14	Hydroxyisocaproate dehydrogenase OS=Aspergillus arachidicola OX=656916 GN=AARAC_003743 PE=3 SV=1	0	11.467	8.52843	5	6	4	1	598	65.1	9.44	10.37	5
FALSE	High	Master Protein	A0A146F662	40S ribosomal protein S19 OS=Aspergillus luchuensis OX=1069201 GN=RIB2604_01004060 PE=4 SV=1	0	11.461	18.6047	4	5	4	1	215	24	8.78	9.55	4
FALSE	High	Master Protein	A0A1L9UK97	Uncharacterized protein OS=Aspergillus brasiliensis CBS 101740 OX=767769 GN=ASPBRDRAFT_196173 PE=4 SV=1	0	11.456	12.9032	3	3	3	1	310	34.8	4.77	9.23	3
FALSE	High	Master Protein	A0A100IRN0	Mannitol dehydrogenase OS=Aspergillus niger OX=5061 GN=ABL_08586 PE=4 SV=1	0	11.45	8.16733	4	5	4	1	502	56.1	5.82	12.4	4
FALSE	High	Master Protein	A0A1L9NMY0	Uncharacterized protein OS=Aspergillus tubingensis CBS 134.48 OX=767770 GN=ASPTUDRAFT_113102 PE=3 SV=1	0	11.411	8.54922	3	6	3	1	386	41.7	6.6	15.18	3
FALSE	High	Master Protein	A0A0L1JGM7	Argininosuccinate synthase OS=Aspergillus nomius NRRL 13137 OX=1509407 GN=ANOM_001491 PE=3 SV=1	0	11.398	5.9952	2	3	2	1	417	46.8	5.67	7.74	2
FALSE	High	Master Protein	G7XCM1	Phospholipase, PLC-D OS=Aspergillus kawachii (strain NBRC 4308) OX=1033177 GN=AKAW_03077 PE=4 SV=1	0	11.379	8.77944	4	5	4	1	467	53.8	5.12	12.93	4
FALSE	High	Master Protein	A0A146EYN3	Similar to An12g08890 OS=Aspergillus luchuensis OX=1069201 GN=RIB2604_00101850 PE=4 SV=1	0	11.349	9.28144	2	2	2	1	334	36.1	5.83	6.49	2
FALSE	High	Master Protein	A0A1M3T4Q9	40S ribosomal protein S1 OS=Aspergillus luchuensis CBS 106.47 OX=1137211 GN=RPS1 PE=3 SV=1	0	11.32	13.6719	3	5	3	1	256	29.2	10.04	11.31	3
FALSE	High	Master Protein	A0A1M3TVR5	Uncharacterized protein OS=Aspergillus luchuensis CBS 106.47 OX=1137211 GN=ASPFODRAFT_57040 PE=4 SV=1	0	11.308	13.0435	3	4	3	1	276	29.6	6.55	11.45	3
FALSE	High	Master Protein	A0A1L9N9A7	Uncharacterized protein OS=Aspergillus tubingensis CBS 134.48 OX=767770 GN=ASPTUDRAFT_189799 PE=4 SV=1	0	11.293	18.0791	3	7	3	1	177	19.4	5.05	17.38	3
FALSE	High	Master Protein	A0A1E3BT63	Uncharacterized protein OS=Aspergillus cristatus OX=573508 GN=SI65_01763 PE=4 SV=1	0	11.292	5.24554	4	5	4	1	896	97.7	6.79	12.52	4
FALSE	High	Master Protein	A0A254U9E1	Uncharacterized protein OS=Aspergillus niger OX=5061 GN=CAN33_35515 PE=4 SV=1	0	11.29	4.67405	3	4	3	1	813	90.7	6.15	10.25	3
FALSE	High	Master Protein	A0A0M3M4Y7	Pectate lyase family protein OS=Aspergillus niger OX=5061 GN=pelA PE=2 SV=1	0	11.199	8.97098	3	6	3	1	379	39.7	4.34	15.24	3
FALSE	High	Master Protein	A0A117E266	Alpha/beta hydrolase OS=Aspergillus niger OX=5061 GN=ABL_06721 PE=4 SV=1	0	11.142	7.69231	4	4	4	1	546	61.1	5.85	9.78	4
FALSE	High	Master Protein	A0A1L9NQH5	Uncharacterized protein OS=Aspergillus tubingensis CBS 134.48 OX=767770 GN=ASPTUDRAFT_38602 PE=4 SV=1	0	11.061	25.9615	2	3	2	1	104	11.4	7.61	10.74	2
FALSE	High	Master Protein	A0A1L9X198	Uncharacterized protein OS=Aspergillus aculeatus ATCC 16872 OX=690307 GN=ASPACDRAFT_76666 PE=4 SV=1	0	11.06	10.3594	4	4	4	1	473	48.9	7.18	9.82	4
FALSE	High	Master Protein	A0A100IJ10	Unnamed protein product OS=Aspergillus niger OX=5061 GN=ABL_04812 PE=4 SV=1	0	11.026	4.61957	4	4	2	1	1104	119.2	6.07	10.59	4
FALSE	High	Master Protein	A0A146FSJ4	Tripeptidyl peptidase A OS=Aspergillus luchuensis OX=1069201 GN=RIB2604_02600670 PE=4 SV=1	0	11.003	6.21762	3	4	3	1	579	61.9	4.5	10.72	3
FALSE	High	Master Protein	A2QF85	Uncharacterized protein OS=Aspergillus niger (strain CBS 513.88 / FGSC A1513) OX=425011 GN=An02g13650 PE=4 SV=1	0	10.977	15.2047	2	3	2	1	171	18.1	4.88	6.59	2
FALSE	High	Master Protein	A0A124BVH4	Acyl-CoA dehydrogenase, mitochondrial OS=Aspergillus niger OX=5061 GN=ABL_01447 PE=4 SV=1	0	10.931	5.09194	3	3	3	1	707	78.2	7.02	7.75	3
FALSE	High	Master Protein	A0A1M3SYU5	Uncharacterized protein OS=Aspergillus luchuensis CBS 106.47 OX=1137211 GN=ASPFODRAFT_201249 PE=4 SV=1	0	10.916	11.6601	5	5	5	1	506	55.6	7.21	11.8	5
FALSE	High	Master Protein	A0A146F294	26S proteasome regulatory subunit rpn-8 OS=Aspergillus luchuensis OX=1069201 GN=RIB2604_00608900 PE=4 SV=1	0	10.895	11.3889	3	3	3	1	360	40.1	6.01	7.1	3
FALSE	High	Master Protein	A0A0L1J251	Proteasome endopeptidase complex OS=Aspergillus nomius NRRL 13137 OX=1509407 GN=ANOM_005170 PE=3 SV=1	0	10.873	16.1491	4	5	4	1	322	35.7	7.75	10.89	4
FALSE	High	Master Protein	Q5B4I4	KH domain RNA-binding protein (AFU_orthologue AFUA_2G02780) OS=Emericella nidulans (strain FGSC A4 / ATCC 38163 / CBS 112.46 / NRRL 194 / M139) OX=227321 GN=ANIA_04546 PE=4 SV=1	0	10.796	7.19557	3	3	3	1	542	58.7	7.43	7.96	3
FALSE	High	Master Protein	A0A254U087	AAR2 protein family protein OS=Aspergillus niger OX=5061 GN=CAN33_53525 PE=3 SV=1	0	10.794	6.93878	3	3	3	1	490	54.3	6.23	9.16	3
FALSE	High	Master Protein	G7XZX5	Similar to An02g00330 OS=Aspergillus kawachii (strain NBRC 4308) OX=1033177 GN=AKAW_10631 PE=4 SV=1	0	10.78	19.6532	2	3	2	1	173	18.5	4.94	8.82	2
FALSE	High	Master Protein	A0A117DXS9	Class V chitinase OS=Aspergillus niger OX=5061 GN=ABL_01657 PE=3 SV=1	0	10.756	7.15884	3	6	3	1	447	49	5.36	13.12	3
FALSE	High	Master Protein	A0A1M3TRT2	Uncharacterized protein OS=Aspergillus luchuensis CBS 106.47 OX=1137211 GN=ASPFODRAFT_30449 PE=4 SV=1	0	10.701	18	2	3	2	1	150	15.2	9.82	9.03	2
FALSE	High	Master Protein	A0A1L9MRG9	Uncharacterized protein OS=Aspergillus tubingensis CBS 134.48 OX=767770 GN=ASPTUDRAFT_156027 PE=4 SV=1	0	10.699	16.5049	2	2	2	1	206	21	5.45	7.38	2
FALSE	High	Master Protein	A0A117E1I3	Extracellular cellulase CelA/allergen Asp F7-like OS=Aspergillus niger OX=5061 GN=ABL_06779 PE=4 SV=1	0	10.689	5.23364	2	2	2	1	535	53.5	4.11	6.39	2
FALSE	High	Master Protein	A0A100ITZ9	Alpha-L-arabinofuranosidase A OS=Aspergillus niger OX=5061 GN=ABL_09965 PE=4 SV=1	0	10.66	3.82166	2	5	2	1	628	67.9	4.28	16.78	2
FALSE	High	Master Protein	A0A146FFB7	Allergen OS=Aspergillus luchuensis OX=1069201 GN=RIB2604_01805200 PE=4 SV=1	0	10.652	26.506	4	7	4	1	166	17.9	5.96	13.74	4
FALSE	High	Master Protein	A0A146F8W5	Cytochrome b5 OS=Aspergillus luchuensis OX=1069201 GN=RIB2604_01504480 PE=3 SV=1	0	10.65	14.2857	2	3	2	1	161	17.4	5.03	8.58	2
FALSE	High	Master Protein	G7XSF5	Acyl-CoA dehydrogenase family protein OS=Aspergillus kawachii (strain NBRC 4308) OX=1033177 GN=AKAW_07954 PE=3 SV=1	0	10.579	7.8125	3	4	3	1	448	49.7	8.7	10.49	3
FALSE	High	Master Protein	A0A100I3F9	RNA polymerase I specific transcription initiation factor Rrn7 OS=Aspergillus niger OX=5061 GN=ABL_00146 PE=4 SV=1	0	10.57	4.93218	4	8	4	1	811	91.8	6.18	19.42	4
FALSE	High	Master Protein	A0A1M3TTT1	Glycoside hydrolase family 30 protein OS=Aspergillus luchuensis CBS 106.47 OX=1137211 GN=ASPFODRAFT_58763 PE=3 SV=1	0	10.566	9.61924	3	3	3	1	499	53.3	4.3	8.03	3
FALSE	High	Master Protein	A0A1M3TY72	Tryptophan synthase OS=Aspergillus luchuensis CBS 106.47 OX=1137211 GN=ASPFODRAFT_55372 PE=3 SV=1	0	10.518	6.5097	4	4	4	1	722	77.2	6.16	10.16	4
FALSE	High	Master Protein	A0A1L9N6T5	Uncharacterized protein OS=Aspergillus tubingensis CBS 134.48 OX=767770 GN=ASPTUDRAFT_168337 PE=4 SV=1	0	10.504	11.6848	4	4	4	1	368	38.9	7.03	9.34	4
FALSE	High	Master Protein	A0A1L9UJK7	Uncharacterized protein OS=Aspergillus brasiliensis CBS 101740 OX=767769 GN=ASPBRDRAFT_55138 PE=3 SV=1	0	10.48	26.1111	4	4	4	1	180	20.8	9.95	9.2	4
FALSE	High	Master Protein	A0A0J5Q018	Formamidase OS=Aspergillus fumigatus Z5 OX=1437362 GN=Y699_04764 PE=4 SV=1	0	10.455	5.16796	3	3	3	1	774	86.5	6.93	9.99	3
FALSE	High	Master Protein	A0A100IHQ6	NADP(+) coupled glycerol dehydrogenase OS=Aspergillus niger OX=5061 GN=ABL_04165 PE=4 SV=1	0	10.428	14.791	4	5	4	1	311	35	7.74	8.52	4
FALSE	High	Master Protein	A0A1L9N5Y1	1,3-beta-glucanosyltransferase OS=Aspergillus tubingensis CBS 134.48 OX=767770 GN=ASPTUDRAFT_121162 PE=3 SV=1	0	10.414	8.51528	3	4	3	1	458	48.5	4.97	10.04	3
FALSE	High	Master Protein	G0W2Q8	Calmodulin (Fragment) OS=Aspergillus fumigatiaffinis OX=340414 GN=caM PE=4 SV=1	0	10.357	39.6825	4	5	1	1	126	14.3	4.27	13.64	4
FALSE	High	Master Protein	A0A100I1V8	Quercetin 2,3-dioxygenase OS=Aspergillus niger OX=5061 GN=ABL_00031 PE=4 SV=1	0	10.304	10.6267	3	3	3	1	367	40	4.87	8.94	3
FALSE	High	Master Protein	A0A100IEA6	Glycosyl hydrolase OS=Aspergillus niger OX=5061 GN=ABL_02927 PE=4 SV=1	0	10.289	5.97738	3	3	3	1	619	68.5	5.01	9.58	3
FALSE	High	Master Protein	A0A100IE53	Transcription factor OS=Aspergillus niger OX=5061 GN=ABL_03198 PE=4 SV=1	0	10.284	4.75651	4	4	4	1	883	98.4	6.18	8.53	4
FALSE	High	Master Protein	A0A117DXA8	Glucose-6-phosphate 1-epimerase OS=Aspergillus niger OX=5061 GN=ABL_02292 PE=3 SV=1	0	10.247	6.875	2	4	2	1	320	35.1	5.15	10.52	2
FALSE	High	Master Protein	A0A1M3TQZ2	Uncharacterized protein OS=Aspergillus luchuensis CBS 106.47 OX=1137211 GN=ASPFODRAFT_181499 PE=4 SV=1	0	10.157	8.43806	4	4	4	1	557	61.4	5.44	11.19	4
FALSE	High	Master Protein	A0A1L9N8A0	Uncharacterized protein OS=Aspergillus tubingensis CBS 134.48 OX=767770 GN=ASPTUDRAFT_119649 PE=3 SV=1	0	10.127	11.5607	4	4	4	1	346	39.7	5.5	11.01	4
FALSE	High	Master Protein	A0A0B4UL66	Endo-polygalacturonase OS=Aspergillus niger OX=5061 PE=2 SV=1	0	10.122	6.48649	2	3	2	1	370	38.7	4.18	7.65	2
FALSE	High	Master Protein	A0A117E118	Mandelate racemase/muconate lactonizing enzyme family protein OS=Aspergillus niger OX=5061 GN=ABL_05989 PE=4 SV=1	0	10.118	9.95575	4	5	4	1	452	50.1	5.39	13.08	4
FALSE	High	Master Protein	A0A117DUZ4	Phosphoserine phosphatase OS=Aspergillus niger OX=5061 GN=ABL_00528 PE=4 SV=1	0	10.098	18.5606	4	5	4	1	264	29.5	5.02	10.03	4
FALSE	High	Master Protein	G7X6C3	CobW/P47K family protein OS=Aspergillus kawachii (strain NBRC 4308) OX=1033177 GN=AKAW_00588 PE=4 SV=1	0	10.089	12.3333	3	4	3	1	300	32.2	6.23	9.73	3
FALSE	High	Master Protein	A0A0F4IWR0	Peptidyl-prolyl cis-trans isomerase OS=Streptomyces katrae OX=68223 GN=VR44_33345 PE=3 SV=1	0	10.074	15.1515	2	3	1	1	165	17.8	6.18	7.37	2
FALSE	High	Master Protein	A0A0L1ILR2	Proteasome subunit alpha type OS=Aspergillus nomius NRRL 13137 OX=1509407 GN=ANOM_010322 PE=3 SV=1	0	10.039	13.1868	3	3	3	1	273	30.1	5.87	8.02	3
FALSE	High	Master Protein	A0A1M3TVZ5	S-methyl-5'-thioadenosine phosphorylase OS=Aspergillus luchuensis CBS 106.47 OX=1137211 GN=ASPFODRAFT_57261 PE=3 SV=1	0	10.026	4.82509	3	5	3	1	829	91.3	6.33	11.18	3
FALSE	High	Master Protein	A0A1L9NFH0	Uncharacterized protein OS=Aspergillus tubingensis CBS 134.48 OX=767770 GN=ASPTUDRAFT_136174 PE=4 SV=1	0	10.01	9.71429	3	5	3	1	350	38.8	5.05	13.82	3
FALSE	High	Master Protein	A0A1L9NPX2	Uncharacterized protein OS=Aspergillus tubingensis CBS 134.48 OX=767770 GN=ASPTUDRAFT_112470 PE=4 SV=1	0	9.854	9.83607	4	5	4	1	427	47	9.29	13.25	4
FALSE	High	Master Protein	A0A146FMZ4	FAD binding domain containing protein OS=Aspergillus luchuensis OX=1069201 GN=RIB2604_02103910 PE=4 SV=1	0	9.81	8.81226	4	4	4	1	522	56.6	8.1	9.46	4
FALSE	High	Master Protein	A0A146F034	Dihydroxyacetone kinase OS=Aspergillus luchuensis OX=1069201 GN=RIB2604_00400930 PE=4 SV=1	0	9.775	6.72131	3	3	3	1	610	65.4	6.11	5.99	3
FALSE	High	Master Protein	A0A1M3TMJ9	Uncharacterized protein OS=Aspergillus luchuensis CBS 106.47 OX=1137211 GN=ASPFODRAFT_129990 PE=4 SV=1	0	9.753	10.3064	3	3	3	1	359	39.4	7.91	6.88	3
FALSE	High	Master Protein	A0A124BWT6	Cyanate hydratase OS=Aspergillus niger OX=5061 GN=cyn1 PE=3 SV=1	0	9.719	1.61725	1	2	1	1	742	83.7	5.91	5.42	1
FALSE	High	Master Protein	A0A100IRW4	Uncharacterized protein LOC100273618 OS=Aspergillus niger OX=5061 GN=ABL_08873 PE=3 SV=1	0	9.699	13.3705	4	4	4	1	359	38.6	5.68	10.83	4
FALSE	High	Master Protein	A0A100IC39	Endo-xylogalacturonan hydrolase A OS=Aspergillus niger OX=5061 GN=ABL_02686 PE=3 SV=1	0	9.685	8.867	3	3	3	1	406	42	4.54	9.24	3
FALSE	High	Master Protein	Q0CSY9	Glutamine synthetase OS=Aspergillus terreus (strain NIH 2624 / FGSC A1156) OX=341663 GN=ATEG_03195 PE=3 SV=1	0	9.684	10.4046	2	2	2	1	346	38.5	5.72	5.29	2
FALSE	High	Master Protein	A0A100IJE3	Patched sphingolipid transporter OS=Aspergillus niger OX=5061 GN=ABL_05005 PE=4 SV=1	0	9.662	2.97572	3	4	3	1	1277	140.2	5.24	11.08	3
FALSE	High	Master Protein	A0A0U5FX40	Putative Small GTPase AvaA OS=Aspergillus calidoustus OX=454130 GN=ASPCAL04443 PE=4 SV=1	0	9.635	17.4757	3	4	2	1	206	23	5.02	8.24	3
FALSE	High	Master Protein	A0A100I820	Ribonuclease T2 family OS=Aspergillus niger OX=5061 GN=ABL_01654 PE=3 SV=1	0	9.633	6.49652	2	5	2	1	431	47.4	5.88	10.25	2
FALSE	High	Master Protein	A0A100IPJ6	Dipeptidyl-peptidase V OS=Aspergillus niger OX=5061 GN=ABL_07633 PE=4 SV=1	0	9.562	3.44353	2	4	2	1	726	79.2	4.42	9.28	2
FALSE	High	Master Protein	A0A117DW12	Catechol dioxygenase OS=Aspergillus niger OX=5061 GN=ABL_01312 PE=4 SV=1	0	9.559	10.7937	3	4	3	1	315	35.4	5.76	10.76	3
FALSE	High	Master Protein	G7Y086	Uncharacterized protein OS=Aspergillus kawachii (strain NBRC 4308) OX=1033177 GN=AKAW_10692 PE=4 SV=1	0	9.558	7.52688	1	2	1	1	186	20	4.92	6.76	1
FALSE	High	Master Protein	A0A146F345	Carboxymethylcellulase B OS=Aspergillus luchuensis OX=1069201 GN=RIB2604_00607630 PE=3 SV=1	0	9.537	8.53081	3	4	1	1	422	47.1	4.37	8.94	3
FALSE	High	Master Protein	A0A146FEM5	Alpha/beta hydrolase OS=Aspergillus luchuensis OX=1069201 GN=RIB2604_01800730 PE=4 SV=1	0	9.515	9.33333	2	3	2	1	300	32.9	5.35	6.09	2
FALSE	High	Master Protein	A0A146FP49	Methylmalonate-semialdehyde dehydrogenase OS=Aspergillus luchuensis OX=1069201 GN=RIB2604_02106950 PE=4 SV=1	0	9.449	6.5	3	4	3	1	600	63.8	7.9	10.39	3
FALSE	High	Master Protein	A0A146FIK0	Peptide hydrolase OS=Aspergillus luchuensis OX=1069201 GN=RIB2604_01903040 PE=3 SV=1	0	9.444	8.4399	3	3	3	1	391	43.4	5.53	8.41	3
FALSE	High	Master Protein	A0A1S9DQ15	N-acetyl-gamma-glutamyl-phosphate reductase OS=Aspergillus oryzae OX=5062 GN=OAory_01076480 PE=3 SV=1	0	9.419	2.11838	3	3	3	1	1605	175.8	6.61	7.05	3
FALSE	High	Master Protein	A0A1R3RK11	Uncharacterized protein OS=Aspergillus carbonarius (strain ITEM 5010) OX=602072 GN=ASPCADRAFT_208482 PE=4 SV=1	0	9.384	11.3924	3	5	3	1	316	35.5	8.7	12.1	3
FALSE	High	Master Protein	A0A100I5R0	Uncharacterized protein OS=Aspergillus niger OX=5061 GN=ABL_01096 PE=4 SV=1	0	9.381	2.63505	1	2	1	1	759	74.2	4.35	8.45	1
FALSE	High	Master Protein	A0A1S9DUY1	Cytochrome c1 OS=Aspergillus oryzae OX=5062 GN=OAory_01006380 PE=4 SV=1	0	9.378	3.10811	2	3	2	1	740	82.4	5.55	7.44	2
FALSE	High	Master Protein	A0A146FM63	Uncharacterized protein OS=Aspergillus luchuensis OX=1069201 GN=RIB2604_02104190 PE=4 SV=1	0	9.375	13.0769	3	4	3	1	260	29	5.14	9.76	3
FALSE	High	Master Protein	A0A1L9U6U4	Uncharacterized protein OS=Aspergillus brasiliensis CBS 101740 OX=767769 GN=ASPBRDRAFT_135783 PE=4 SV=1	0	9.284	8.90208	2	3	2	1	337	36.8	9.03	4.95	2
FALSE	High	Master Protein	A0A1M3U1I5	Uncharacterized protein OS=Aspergillus luchuensis CBS 106.47 OX=1137211 GN=ASPFODRAFT_56338 PE=4 SV=1	0	9.241	9.49721	1	3	1	1	179	19.8	4.96	12.13	1
FALSE	High	Master Protein	A0A1M3TRT3	Glutathione peroxidase OS=Aspergillus luchuensis CBS 106.47 OX=1137211 GN=ASPFODRAFT_58169 PE=3 SV=1	0	9.235	21.5094	5	5	5	1	265	29.4	9.17	11.74	5
FALSE	High	Master Protein	A0A1L9V0K5	Uncharacterized protein OS=Aspergillus brasiliensis CBS 101740 OX=767769 GN=ASPBRDRAFT_70871 PE=3 SV=1	0	9.195	7.74648	3	4	3	1	426	45.7	4.78	10.66	3
FALSE	High	Master Protein	A0A124BY16	Pyridoxine biosynthesis protein PDX1 OS=Aspergillus niger OX=5061 GN=ABL_06784 PE=3 SV=1	0	9.195	12.2977	3	3	3	1	309	32.9	6.18	6.87	3
FALSE	High	Master Protein	A0A100ILE8	3-hydroxybutyryl-CoA dehydrogenase OS=Aspergillus niger OX=5061 GN=ABL_05736 PE=4 SV=1	0	9.187	10.6583	3	4	3	1	319	33.9	8.5	11.28	3
FALSE	High	Master Protein	G3Y305	NAD-specific glutamate dehydrogenase OS=Aspergillus niger (strain ATCC 1015 / CBS 113.46 / FGSC A1144 / LSHB Ac4 / NCTC 3858a / NRRL 328 / USDA 3528.7) OX=380704 GN=gdhB PE=3 SV=1	0	9.172	5.0405	4	5	4	1	1111	125.1	6.38	7.5	4
FALSE	High	Master Protein	A0A100IIF9	DUF718 domain protein OS=Aspergillus niger OX=5061 GN=ABL_04455 PE=4 SV=1	0	9.152	31.0924	3	5	3	1	119	13.7	4.97	11.27	3
FALSE	High	Master Protein	A0A1M3T7Y6	Glycoside hydrolase family 17 protein OS=Aspergillus luchuensis CBS 106.47 OX=1137211 GN=ASPFODRAFT_221803 PE=3 SV=1	0	9.123	7.28477	3	5	3	1	453	45.9	4.51	15.03	3
FALSE	High	Master Protein	A0A117E041	Ribose 5-phosphate isomerase A OS=Aspergillus niger OX=5061 GN=ABL_04649 PE=4 SV=1	0	9.123	13.5531	3	5	3	1	273	28.4	5.76	10.33	3
FALSE	High	Master Protein	A0A1L9N1T9	Uncharacterized protein OS=Aspergillus tubingensis CBS 134.48 OX=767770 GN=ASPTUDRAFT_57229 PE=4 SV=1	0	9.122	15.2439	2	3	2	1	164	18.6	8.57	8.26	2
FALSE	High	Master Protein	A0A100IB46	Acetyl-coenzyme A synthetase OS=Aspergillus niger OX=5061 GN=ABL_02424 PE=3 SV=1	0	9.121	7.76119	5	5	5	1	670	74.3	6.27	9.13	5
FALSE	High	Master Protein	A0A2K4ZYX9	Uncharacterized protein OS=Aspergillus niger OX=5061 GN=ATCC64974_26450 PE=3 SV=1	0	9.117	7.83784	2	3	2	1	370	40.5	5.44	4.92	2
FALSE	High	Master Protein	A2QXI7	Aspergillus niger contig An11c0300, genomic contig OS=Aspergillus niger (strain CBS 513.88 / FGSC A1513) OX=425011 GN=An11g09120 PE=4 SV=1	0	9.111	23.8806	3	6	3	1	134	15	11.14	16.89	3
FALSE	High	Master Protein	A0A124BWH7	Aspartyl-tRNA synthetase Dps1 OS=Aspergillus niger OX=5061 GN=ABL_03047 PE=3 SV=1	0	9.076	8.58676	4	4	4	1	559	62	6.1	9.53	4
FALSE	High	Master Protein	B0Y722	Isocitrate dehydrogenase [NAD] subunit, mitochondrial OS=Neosartorya fumigata (strain CEA10 / CBS 144.89 / FGSC A1163) OX=451804 GN=AFUB_072290 PE=3 SV=1	0	9.054	4.3956	2	4	2	1	455	49.7	8.15	12.57	2
FALSE	High	Master Protein	A0A146FYX9	Pectinesterase OS=Aspergillus luchuensis OX=1069201 GN=RIB2604_03102460 PE=4 SV=1	0	9.051	11.1421	3	3	3	1	359	38.8	4.63	7.32	3
FALSE	High	Master Protein	A0A0L1IKM1	Aminopeptidase OS=Aspergillus nomius NRRL 13137 OX=1509407 GN=ANOM_011122 PE=4 SV=1	0	9.045	3.39303	3	5	1	1	1061	118.7	5.57	13.24	3
FALSE	High	Master Protein	A0A0F0IFB9	RPT1 like protein OS=Aspergillus parasiticus (strain ATCC 56775 / NRRL 5862 / SRRC 143 / SU-1) OX=1403190 GN=P875_00011292 PE=3 SV=1	0	9.029	11.7048	4	4	3	1	393	44.1	5.81	7.64	4
FALSE	High	Master Protein	A0A0F8VC96	Eukaryotic translation initiation factor 2 subunit gamma OS=Aspergillus rambellii OX=308745 GN=ARAM_000323 PE=4 SV=1	0	8.997	3.7001	3	3	3	1	1027	111.7	6.68	7.51	3
FALSE	High	Master Protein	A0A1L9UUC2	Succinyl-CoA:3-ketoacid-coenzyme A transferase OS=Aspergillus brasiliensis CBS 101740 OX=767769 GN=ASPBRDRAFT_119640 PE=3 SV=1	0	8.945	7.53968	3	3	2	1	504	54.5	7.02	7.08	3
FALSE	High	Master Protein	A0A146EXG2	Phosphotransferase OS=Aspergillus luchuensis OX=1069201 GN=RIB2604_00102120 PE=3 SV=1	0	8.876	5.25253	2	3	2	1	495	54.3	5.68	8.51	2
FALSE	High	Master Protein	A0A117E149	Eukaryotic translation initiation factor 3 subunit H OS=Aspergillus niger OX=5061 GN=ABL_04188 PE=3 SV=1	0	8.859	4.5082	3	4	3	1	732	81	8.51	10.29	3
FALSE	High	Master Protein	A0A0F8U516	Uncharacterized protein OS=Aspergillus ochraceoroseus OX=138278 GN=AOCH_003532 PE=4 SV=1	0	8.84	3.49127	3	3	1	1	1203	132.8	6.84	7.76	3
FALSE	High	Master Protein	A0A1F8ABX5	Polyadenylate-binding protein (Fragment) OS=Aspergillus bombycis OX=109264 GN=ABOM_002272 PE=3 SV=1	0	8.762	5.22293	4	5	4	1	785	85.4	5.97	11.44	4
FALSE	High	Master Protein	A0A100ICN8	Cyclin OS=Aspergillus niger OX=5061 GN=ABL_02795 PE=3 SV=1	0	8.739	4.6131	3	5	3	1	672	76.5	6.76	8.64	3
FALSE	High	Master Protein	Q0CSG6	Uncharacterized protein OS=Aspergillus terreus (strain NIH 2624 / FGSC A1156) OX=341663 GN=ATEG_03368 PE=4 SV=1	0	8.72	10.4348	1	2	1	1	115	12.6	5.25	8.36	1
FALSE	High	Master Protein	A0A1L9UL25	Uncharacterized protein OS=Aspergillus brasiliensis CBS 101740 OX=767769 GN=ASPBRDRAFT_42048 PE=4 SV=1	0	8.71	5.81162	3	5	3	1	499	54.4	5.24	12.85	3
FALSE	High	Master Protein	A0A100IRC9	Uncharacterized protein OS=Aspergillus niger OX=5061 GN=ABL_08585 PE=4 SV=1	0	8.674	12.2137	1	3	1	1	131	13	4.22	8.14	1
FALSE	High	Master Protein	A0A1L9UXM0	Uncharacterized protein OS=Aspergillus brasiliensis CBS 101740 OX=767769 GN=ASPBRDRAFT_192519 PE=3 SV=1	0	8.674	11.271	4	4	4	1	417	47.3	10.15	9.28	4
FALSE	High	Master Protein	A0A146FIV0	Saccharopine dehydrogenase OS=Aspergillus luchuensis OX=1069201 GN=RIB2604_02004900 PE=4 SV=1	0	8.656	11.1607	5	7	5	1	448	49.1	5.82	14.91	5
FALSE	High	Master Protein	A0A100II27	Uncharacterized protein OS=Aspergillus niger OX=5061 GN=ABL_04309 PE=4 SV=1	0	8.633	13.7143	2	4	2	1	175	18.8	5.52	12.17	2
FALSE	High	Master Protein	A0A1L9PLC7	Uncharacterized protein OS=Aspergillus versicolor CBS 583.65 OX=1036611 GN=ASPVEDRAFT_53048 PE=3 SV=1	0	8.629	2.51221	3	3	1	1	1433	155.4	6.93	5.12	3
FALSE	High	Master Protein	A0A2I2GB70	GTP-binding nuclear protein OS=Aspergillus steynii IBT 23096 OX=1392250 GN=P170DRAFT_380516 PE=3 SV=1	0	8.629	14.8148	3	4	3	1	216	24.2	6.92	11.16	3
FALSE	High	Master Protein	G3XWX7	Uncharacterized protein OS=Aspergillus niger (strain ATCC 1015 / CBS 113.46 / FGSC A1144 / LSHB Ac4 / NCTC 3858a / NRRL 328 / USDA 3528.7) OX=380704 GN=ASPNIDRAFT_210319 PE=3 SV=1	0	8.623	6.90738	3	3	3	1	637	70.9	7.17	6.8	3
FALSE	High	Master Protein	G3XP44	Uncharacterized protein OS=Aspergillus niger (strain ATCC 1015 / CBS 113.46 / FGSC A1144 / LSHB Ac4 / NCTC 3858a / NRRL 328 / USDA 3528.7) OX=380704 GN=ASPNIDRAFT_41640 PE=4 SV=1	0	8.617	8.2397	2	3	2	1	267	27.3	4.98	4.96	2
FALSE	High	Master Protein	A0A2I2FXP0	Putative mitochondrial cytochrome b2 OS=Aspergillus steynii IBT 23096 OX=1392250 GN=P170DRAFT_512101 PE=3 SV=1	0	8.598	8.50202	3	4	1	1	494	53.6	6.3	6.79	3
FALSE	High	Master Protein	A2QV30	Uncharacterized protein OS=Aspergillus niger (strain CBS 513.88 / FGSC A1513) OX=425011 GN=An10g00810 PE=4 SV=1	0	8.572	9.89399	2	2	2	1	283	31.9	10.58	3.98	2
FALSE	High	Master Protein	A0A100IMS1	Glutathione reductase OS=Aspergillus niger OX=5061 GN=ABL_06745 PE=3 SV=1	0	8.558	2.37838	2	3	2	1	925	100	8.18	8.08	2
FALSE	High	Master Protein	A0A1L9N4R0	Alanine--tRNA ligase OS=Aspergillus tubingensis CBS 134.48 OX=767770 GN=ALA1 PE=3 SV=1	0	8.524	4.12169	3	3	3	1	1019	113.9	6.23	7.13	3
FALSE	High	Master Protein	A0A1F8AG12	ATP synthase D chain OS=Aspergillus bombycis OX=109264 GN=ABOM_001151 PE=4 SV=1	0	8.51	8.35267	3	3	1	1	431	47.6	5.43	7.82	3
FALSE	High	Master Protein	A0A2T5M2I9	Uncharacterized protein OS=Aspergillus ochraceoroseus IBT 24754 OX=1392256 GN=P175DRAFT_0521861 PE=3 SV=1	0	8.508	8.12065	2	4	1	1	431	45.7	6.7	11.48	2
FALSE	High	Master Protein	A0A100ILS2	Serine hydroxymethyltransferase OS=Aspergillus niger OX=5061 GN=ABL_05812 PE=3 SV=1	0	8.507	6.58174	3	3	2	1	471	51.9	7.77	7.04	3
FALSE	High	Master Protein	A0A100IMF6	NADH-ubiquinone oxidoreductase subunit G OS=Aspergillus niger OX=5061 GN=ABL_06582 PE=3 SV=1	0	8.503	7.05563	4	4	4	1	737	80.6	6.42	7.61	4
FALSE	High	Master Protein	A0A1L9NPG4	Uncharacterized protein OS=Aspergillus tubingensis CBS 134.48 OX=767770 GN=ASPTUDRAFT_52811 PE=4 SV=1	0	8.49	10.9023	2	3	2	1	266	27.5	5.26	8.72	2
FALSE	High	Master Protein	A0A2K5ACY3	Uncharacterized protein OS=Aspergillus niger OX=5061 GN=ATCC64974_74490 PE=4 SV=1	0	8.45	2.26415	2	2	2	1	1060	119.4	6.28	5.57	2
FALSE	High	Master Protein	A0A1M3TTY3	Uncharacterized protein OS=Aspergillus luchuensis CBS 106.47 OX=1137211 GN=ASPFODRAFT_40509 PE=4 SV=1	0	8.431	11.9565	2	2	2	1	368	40	5.05	2.68	2
FALSE	High	Master Protein	G7XMU8	Uncharacterized protein OS=Aspergillus kawachii (strain NBRC 4308) OX=1033177 GN=AKAW_06496 PE=4 SV=1	0	8.32	2.55906	2	2	1	1	1016	113.2	8.5	5.25	2
FALSE	High	Master Protein	A0A146FM18	NADH-ubiquinone oxidoreductase 49 kDa subunit OS=Aspergillus luchuensis OX=1069201 GN=RIB2604_02104000 PE=3 SV=1	0	8.311	6.09244	2	2	2	1	476	53.2	6.73	5.93	2
FALSE	High	Master Protein	A0A100INU2	1,3-beta-glucanosyltransferase OS=Aspergillus niger OX=5061 GN=ABL_07290 PE=3 SV=1	0	8.299	3.18352	3	4	3	1	1068	114.5	5.81	7.56	3
FALSE	High	Master Protein	A0A117E2I5	NADH-ubiquinone oxidoreductase 105 kDa subunit OS=Aspergillus niger OX=5061 GN=ABL_08373 PE=4 SV=1	0	8.293	30.8511	2	2	2	1	94	10.7	9.86	5.61	2
FALSE	High	Master Protein	P33559	Endo-1,4-beta-xylanase A OS=Aspergillus kawachii (strain NBRC 4308) OX=1033177 GN=xynA PE=1 SV=2	0	8.292	10.7034	3	4	3	1	327	35.5	6.35	7.41	3
FALSE	High	Master Protein	A0A100IHT5	Fad NAD binding oxidoreductase OS=Aspergillus niger OX=5061 GN=ABL_03918 PE=4 SV=1	0	8.29	7.07317	2	2	2	1	410	43.4	7.03	4.9	2
FALSE	High	Master Protein	A0A0L1J7Z9	Glucose-6-phosphate isomerase OS=Aspergillus nomius NRRL 13137 OX=1509407 GN=ANOM_004402 PE=3 SV=1	0	8.265	6.69078	3	4	1	1	553	61.2	6.3	9.52	3
FALSE	High	Master Protein	A0A146F9L3	Dienelactone hydrolase family protein OS=Aspergillus luchuensis OX=1069201 GN=RIB2604_01602260 PE=4 SV=1	0	8.256	12.0482	3	3	3	1	249	27.4	6.42	8.78	3
FALSE	High	Master Protein	A0A124BXM8	Tripeptidyl-peptidase OS=Aspergillus niger OX=5061 GN=ABL_05568 PE=4 SV=1	0	8.251	4.0783	2	2	2	1	613	65.9	5.59	6.31	2
FALSE	High	Master Protein	A0A146FWB0	1,3-beta-glucanosyltransferase Bgt1 OS=Aspergillus luchuensis OX=1069201 GN=RIB2604_02903120 PE=3 SV=1	0	8.247	10.9272	3	3	3	1	302	32.4	4.78	8.02	3
FALSE	High	Master Protein	A0A1L9ND36	Uncharacterized protein OS=Aspergillus tubingensis CBS 134.48 OX=767770 GN=ASPTUDRAFT_521018 PE=3 SV=1	0	8.238	11.465	3	4	3	1	314	33.9	8.92	10.71	3
FALSE	High	Master Protein	G3XRV4	Proliferating cell nuclear antigen (Fragment) OS=Aspergillus niger (strain ATCC 1015 / CBS 113.46 / FGSC A1144 / LSHB Ac4 / NCTC 3858a / NRRL 328 / USDA 3528.7) OX=380704 GN=ASPNIDRAFT_206156 PE=3 SV=1	0	8.196	2.81996	2	2	2	1	922	102.3	6.02	5.49	2
FALSE	High	Master Protein	A0A0F4YXL4	40S ribosomal protein S11 OS=Rasamsonia emersonii CBS 393.64 OX=1408163 GN=T310_3148 PE=3 SV=1	0	8.147	19.7531	3	4	3	1	162	18.6	10.65	11.56	3
FALSE	High	Master Protein	A0A1R3REX3	Uncharacterized protein OS=Aspergillus carbonarius (strain ITEM 5010) OX=602072 GN=ASPCADRAFT_209664 PE=4 SV=1	0	8.115	13.2867	3	4	3	1	286	30.8	9.09	10.29	3
FALSE	High	Master Protein	A0A1L9MWE5	Uncharacterized protein OS=Aspergillus tubingensis CBS 134.48 OX=767770 GN=ASPTUDRAFT_818561 PE=4 SV=1	0	8.078	7.53296	3	3	3	1	531	57.6	8.24	7.17	3
FALSE	High	Master Protein	G3XW67	Methylisocitrate lyase OS=Aspergillus niger (strain ATCC 1015 / CBS 113.46 / FGSC A1144 / LSHB Ac4 / NCTC 3858a / NRRL 328 / USDA 3528.7) OX=380704 GN=ASPNIDRAFT_42171 PE=4 SV=1	0	8.078	4.07166	2	2	2	1	614	67.6	6.81	6.35	2
FALSE	High	Master Protein	A0A1R3RZC0	Uncharacterized protein OS=Aspergillus carbonarius (strain ITEM 5010) OX=602072 GN=ASPCADRAFT_203662 PE=4 SV=1	0	8.041	8.42697	1	3	1	1	178	20.1	9.42	9.55	1
FALSE	High	Master Protein	A0A1M3T5Y6	Uncharacterized protein OS=Aspergillus luchuensis CBS 106.47 OX=1137211 GN=ASPFODRAFT_143573 PE=4 SV=1	0	8.04	8.94855	4	4	4	1	447	48.5	6.37	6.39	4
FALSE	High	Master Protein	A0A100IAY6	Similar to An04g04940 OS=Aspergillus niger OX=5061 GN=ABL_02375 PE=4 SV=1	0	7.993	4.24242	1	2	1	1	330	35.5	9.19	5.35	1
FALSE	High	Master Protein	A0A2V5HW89	Uncharacterized protein OS=Aspergillus indologenus CBS 114.80 OX=1450541 GN=BP00DRAFT_417796 PE=4 SV=1	0	7.969	2.58964	4	6	4	1	1506	168.6	9.13	13.94	4
FALSE	High	Master Protein	A0A100I925	Uncharacterized protein LOC100192528 OS=Aspergillus niger OX=5061 GN=ABL_01914 PE=4 SV=1	0	7.967	9.64912	3	4	3	1	342	38.2	5.68	9.52	3
FALSE	High	Master Protein	A0A2I2G531	Triosephosphate isomerase OS=Aspergillus steynii IBT 23096 OX=1392250 GN=P170DRAFT_447808 PE=3 SV=1	0	7.964	9.82456	2	3	2	1	285	30.3	5.44	6.77	2
FALSE	High	Master Protein	A0A1M3TKJ9	Uncharacterized protein OS=Aspergillus luchuensis CBS 106.47 OX=1137211 GN=ASPFODRAFT_131665 PE=4 SV=1	0	7.93	30.8824	3	3	3	1	136	15.1	10.23	5.8	3
FALSE	High	Master Protein	A0A2J5I2U6	GTP-binding protein rhoA OS=Aspergillus taichungensis OX=482145 GN=BDW42DRAFT_183753 PE=4 SV=1	0	7.92	8.24742	2	2	2	1	194	21.9	6.67	4.38	2
FALSE	High	Master Protein	A0A100IAP7	2-hydroxyhepta-2,4-diene-1,7-dioate isomerase OS=Aspergillus niger OX=5061 GN=ABL_02321 PE=4 SV=1	0	7.907	10.0478	3	3	3	1	418	46.3	5.41	3.34	3
FALSE	High	Master Protein	A0A100I8W6	1,4-beta-D-glucan cellobiohydrolase B OS=Aspergillus niger OX=5061 GN=ABL_01546 PE=4 SV=1	0	7.88	2.21893	3	4	2	1	1352	144.9	4.72	11.51	3
FALSE	High	Master Protein	A0A146EX84	NADP-dependent alcohol dehydrogenase OS=Aspergillus luchuensis OX=1069201 GN=RIB2604_00100940 PE=3 SV=1	0	7.857	10.8434	3	3	3	1	332	36	7.3	4.91	3
FALSE	High	Master Protein	A0A146EZL6	F5/8 type C domain protein OS=Aspergillus luchuensis OX=1069201 GN=RIB2604_00600350 PE=4 SV=1	0	7.788	14.4928	3	7	3	1	276	30.5	4.11	15.46	3
FALSE	High	Master Protein	G7X9Y8	NADH-ubiquinone oxidoreductase 304 kDa subunit OS=Aspergillus kawachii (strain NBRC 4308) OX=1033177 GN=AKAW_01802 PE=3 SV=1	0	7.772	10.8014	2	2	2	1	287	32.6	8.21	4.81	2
FALSE	High	Master Protein	G7XWQ6	Nitroreductase family protein OS=Aspergillus kawachii (strain NBRC 4308) OX=1033177 GN=AKAW_09479 PE=4 SV=1	0	7.757	10.1382	2	3	2	1	217	24.1	5.29	5.55	2
FALSE	High	Master Protein	A0A1L9P3G8	Uncharacterized protein OS=Aspergillus versicolor CBS 583.65 OX=1036611 GN=ASPVEDRAFT_35384 PE=4 SV=1	0	7.726	14.7541	3	3	3	1	244	27.1	4.98	5.85	3
FALSE	High	Master Protein	A0A1L9N7P7	Uncharacterized protein OS=Aspergillus tubingensis CBS 134.48 OX=767770 GN=ASPTUDRAFT_118036 PE=3 SV=1	0	7.724	10.1124	3	3	3	1	356	39.3	6.54	5.82	3
FALSE	High	Master Protein	A0A254TWJ0	NAD dependent epimerase/dehydratase family protein OS=Aspergillus niger OX=5061 GN=CAN33_37575 PE=4 SV=1	0	7.717	5.8319	3	4	2	1	583	65.8	5.47	8.96	3
FALSE	High	Master Protein	A2QWJ9	Aspergillus niger contig An11c0210, genomic contig (Fragment) OS=Aspergillus niger (strain CBS 513.88 / FGSC A1513) OX=425011 GN=An11g05460 PE=3 SV=1	0	7.715	6.23782	3	3	3	1	513	56.2	7.08	8.69	3
FALSE	High	Master Protein	G7XTZ9	Beta-glucosidase 1 OS=Aspergillus kawachii (strain NBRC 4308) OX=1033177 GN=AKAW_08522 PE=4 SV=1	0	7.697	3.13152	3	3	3	1	958	104.2	5.94	6.49	3
FALSE	High	Master Protein	A0A146F3V9	Uncharacterized protein OS=Aspergillus luchuensis OX=1069201 GN=RIB2604_00900040 PE=4 SV=1	0	7.689	9.79228	2	2	2	1	337	37.4	6.44	2.42	2
FALSE	High	Master Protein	A0A1S9DD40	Ribosomal protein S9 OS=Aspergillus oryzae OX=5062 GN=OAory_01092240 PE=3 SV=1	0	7.661	3.71585	3	4	3	1	915	102.9	7.42	11.08	3
FALSE	High	Master Protein	G7XVI1	Glutathione S-transferase OS=Aspergillus kawachii (strain NBRC 4308) OX=1033177 GN=AKAW_09054 PE=4 SV=1	0	7.633	6.15385	2	2	2	1	390	43.8	6.21	4.92	2
FALSE	High	Master Protein	A0A100IHF7	Short-chain dehydrogenase/reductase family protein OS=Aspergillus niger OX=5061 GN=ABL_03883 PE=4 SV=1	0	7.625	10.3571	2	2	2	1	280	29.7	6.95	7.07	2
FALSE	High	Master Protein	A0A1M3TI98	Carbohydrate-binding module family 1 protein OS=Aspergillus luchuensis CBS 106.47 OX=1137211 GN=ASPFODRAFT_133732 PE=3 SV=1	0	7.596	4.5977	2	3	2	1	522	55.1	4.69	9.32	2
FALSE	High	Master Protein	A0A1L9NGB9	Uncharacterized protein OS=Aspergillus tubingensis CBS 134.48 OX=767770 GN=ASPTUDRAFT_61693 PE=3 SV=1	0	7.581	8.54503	3	3	3	1	433	46.8	6.44	7.48	3
FALSE	High	Master Protein	A0A1L9UZX1	Uncharacterized protein OS=Aspergillus brasiliensis CBS 101740 OX=767769 GN=ASPBRDRAFT_654468 PE=3 SV=1	0	7.55	4.79705	2	3	2	1	542	61.5	5.2	3.33	2
FALSE	High	Master Protein	A0A1M3U0L4	Glycoside hydrolase family 31 protein OS=Aspergillus luchuensis CBS 106.47 OX=1137211 GN=ASPFODRAFT_214212 PE=3 SV=1	0	7.536	5.02283	3	3	3	1	657	75.4	5.53	7.78	3
FALSE	High	Master Protein	A0A117DYK9	2-nitropropane dioxygenase family oxidoreductase OS=Aspergillus niger OX=5061 GN=ABL_03230 PE=4 SV=1	0	7.504	7.83133	2	3	2	1	332	35.7	8.66	9.09	2
FALSE	High	Master Protein	A0A1M3TA65	Uncharacterized protein OS=Aspergillus luchuensis CBS 106.47 OX=1137211 GN=ASPFODRAFT_697896 PE=4 SV=1	0	7.497	9.6875	3	3	3	1	320	35.2	6.7	7.26	3
FALSE	High	Master Protein	G3XNA5	Uncharacterized protein OS=Aspergillus niger (strain ATCC 1015 / CBS 113.46 / FGSC A1144 / LSHB Ac4 / NCTC 3858a / NRRL 328 / USDA 3528.7) OX=380704 GN=ASPNIDRAFT_210876 PE=4 SV=1	0	7.46	28.1818	2	2	2	1	110	11.2	7.81	3.38	2
FALSE	High	Master Protein	A0A1L9N7E5	Uncharacterized protein OS=Aspergillus tubingensis CBS 134.48 OX=767770 GN=ASPTUDRAFT_120061 PE=4 SV=1	0	7.447	2.7366	2	2	2	1	877	95.3	5.68	5.34	2
FALSE	High	Master Protein	G7X932	Similar to An18g04120 OS=Aspergillus kawachii (strain NBRC 4308) OX=1033177 GN=AKAW_01530 PE=4 SV=1	0	7.444	23.7705	2	3	2	1	122	13.2	5.12	7.43	2
FALSE	High	Master Protein	A0A146FY87	Uncharacterized protein OS=Aspergillus luchuensis OX=1069201 GN=RIB2604_03200120 PE=4 SV=1	0	7.416	10.3846	2	2	2	1	260	30.1	8.53	5.51	2
FALSE	High	Master Protein	A0A146FJB4	3-ketoacyl-coA thiolase peroxisomal A OS=Aspergillus luchuensis OX=1069201 GN=RIB2604_02005360 PE=3 SV=1	0	7.416	5.48926	2	2	2	1	419	43.4	7.91	6.59	2
FALSE	High	Master Protein	A0A100I860	EstA OS=Aspergillus niger OX=5061 GN=ABL_01314 PE=3 SV=1	0	7.396	3.9953	3	4	3	1	851	92.8	5.29	10.14	3
FALSE	High	Master Protein	A0A100IQX0	Nascent polypeptide-associated complex subunit beta OS=Aspergillus niger OX=5061 GN=ABL_08353 PE=3 SV=1	0	7.395	2.10325	2	2	2	1	523	57.3	7.43	5.33	2
FALSE	High	Master Protein	A0A146EXH9	ATP dependent RNA helicase OS=Aspergillus luchuensis OX=1069201 GN=RIB2604_00102520 PE=4 SV=1	0	7.395	7.04225	3	3	3	1	497	55.9	6.34	7.58	3
FALSE	High	Master Protein	A0A1L9NCG6	Uncharacterized protein OS=Aspergillus tubingensis CBS 134.48 OX=767770 GN=ASPTUDRAFT_39982 PE=4 SV=1	0	7.373	16.7488	3	4	3	1	203	21.6	6.18	11.92	3
FALSE	High	Master Protein	A0A124BY56	Calcium-transporting ATPase OS=Aspergillus niger OX=5061 GN=ABL_07154 PE=3 SV=1	0	7.37	3.66795	3	3	3	1	1036	111.5	5.66	7.15	3
FALSE	High	Master Protein	A0A146FUW8	Alpha-n-arabinofuranosidase B OS=Aspergillus luchuensis OX=1069201 GN=RIB2604_03001060 PE=4 SV=1	0	7.361	4.40882	2	3	2	1	499	52.6	4.46	8.74	2
FALSE	High	Master Protein	A0A2G7FPZ2	PHD and RING finger domain protein OS=Aspergillus arachidicola OX=656916 GN=AARAC_003986 PE=3 SV=1	0	7.334	2.5825	1	2	1	1	697	77	8.28	6.96	1
FALSE	High	Master Protein	A0A100I8V0	WD40 domain protein OS=Aspergillus niger OX=5061 GN=ABL_01619 PE=4 SV=1	0	7.327	3.3123	3	3	3	1	634	69.8	8.76	9.55	3
FALSE	High	Master Protein	A0A146F7A4	Uncharacterized protein OS=Aspergillus luchuensis OX=1069201 GN=RIB2604_01502060 PE=4 SV=1	0	7.313	17.5182	2	3	2	1	137	15.5	6.33	7.57	2
FALSE	High	Master Protein	A0A146F0H0	Succinate dehydrogenase [ubiquinone] iron-sulfur subunit, mitochondrial OS=Aspergillus luchuensis OX=1069201 GN=RIB2604_00402700 PE=3 SV=1	0	7.299	11.0368	3	3	3	1	299	33.8	8.66	6.57	3
FALSE	High	Master Protein	A0A1S9DI06	Succinate dehydrogenase [ubiquinone] flavoprotein subunit, mitochondrial OS=Aspergillus oryzae OX=5062 GN=OAory_01098620 PE=3 SV=1	0	7.286	2.40616	2	2	1	1	1039	114.6	6.44	5.34	2
FALSE	High	Master Protein	A0A1L9UC97	Uncharacterized protein OS=Aspergillus brasiliensis CBS 101740 OX=767769 GN=ASPBRDRAFT_77492 PE=4 SV=1	0	7.282	4.90694	3	3	3	1	591	64.3	7.02	6.96	3
FALSE	High	Master Protein	A0A117E322	Uncharacterized protein OS=Aspergillus niger OX=5061 GN=ABL_07352 PE=4 SV=1	0	7.249	26.8966	3	4	3	1	145	16.4	9.31	6.89	3
FALSE	High	Master Protein	A0A100IFS8	Sorbitol/xylulose reductase OS=Aspergillus niger OX=5061 GN=ABL_03636 PE=4 SV=1	0	7.246	9.02256	2	3	2	1	266	28.4	6.13	8.64	2
FALSE	High	Master Protein	G7XCA6	UPF0047 domain protein OS=Aspergillus kawachii (strain NBRC 4308) OX=1033177 GN=AKAW_02583 PE=4 SV=1	0	7.246	6.34921	2	4	2	1	441	49.1	6.14	5.16	2
FALSE	High	Master Protein	D5HQ11	Phytase B (Fragment) OS=Aspergillus ficuum OX=5058 GN=phyB PE=2 SV=1	0	7.191	6.52174	2	2	2	1	460	50.7	4.6	4.74	2
FALSE	High	Master Protein	A0A1L9N9K0	Carboxylic ester hydrolase OS=Aspergillus tubingensis CBS 134.48 OX=767770 GN=ASPTUDRAFT_116643 PE=3 SV=1	0	7.188	5.48885	3	4	2	1	583	63.7	4.83	8.43	3
FALSE	High	Master Protein	A0A0L1J2Y9	Alcohol dehydrogenase OS=Aspergillus nomius NRRL 13137 OX=1509407 GN=ANOM_004866 PE=4 SV=1	0	7.182	6.36792	2	2	2	1	424	44.7	6.16	5.79	2
FALSE	High	Master Protein	A0A100I890	NAD binding Rossmann fold oxidoreductase OS=Aspergillus niger OX=5061 GN=ABL_01709 PE=4 SV=1	0	7.179	3.64078	1	1	1	1	412	45.3	6.6	3.98	1
FALSE	High	Master Protein	A0A1L9NQL0	Uncharacterized protein OS=Aspergillus tubingensis CBS 134.48 OX=767770 GN=ASPTUDRAFT_164702 PE=4 SV=1	0	7.174	2.11102	2	2	2	1	1279	138.6	5.82	5.59	2
FALSE	High	Master Protein	A0A1L9UHY9	Pyrroline-5-carboxylate reductase OS=Aspergillus brasiliensis CBS 101740 OX=767769 GN=ASPBRDRAFT_196747 PE=3 SV=1	0	7.174	2.75862	2	2	2	1	870	93.9	6.19	6.44	2
FALSE	High	Master Protein	A0A1L9NIB8	Uncharacterized protein OS=Aspergillus tubingensis CBS 134.48 OX=767770 GN=ASPTUDRAFT_195663 PE=4 SV=1	0	7.162	17.3913	3	4	3	1	207	23.2	4.81	9.84	3
FALSE	High	Master Protein	A0A100IMH6	Pectin lyase D OS=Aspergillus niger OX=5061 GN=ABL_06612 PE=3 SV=1	0	7.155	6.43432	2	3	2	1	373	39	4.49	8.1	2
FALSE	High	Master Protein	A0A1L9UA72	Uncharacterized protein OS=Aspergillus brasiliensis CBS 101740 OX=767769 GN=ASPBRDRAFT_33164 PE=4 SV=1	0	7.129	3.98724	2	3	2	1	627	67.6	4.34	7.63	2
FALSE	High	Master Protein	A0A100I4B0	Uncharacterized protein OS=Aspergillus niger OX=5061 GN=ABL_00708 PE=4 SV=1	0	7.115	7.96813	4	4	4	1	502	54.5	9.31	11.47	4
FALSE	High	Master Protein	A0A1M3TP78	Uncharacterized protein OS=Aspergillus luchuensis CBS 106.47 OX=1137211 GN=ASPFODRAFT_79935 PE=4 SV=1	0	7.112	8.62745	2	2	2	1	255	27.6	5.64	4.99	2
FALSE	High	Master Protein	A0A1L9X6S4	NADH dehydrogenase [ubiquinone] flavoprotein 1, mitochondrial OS=Aspergillus aculeatus ATCC 16872 OX=690307 GN=ASPACDRAFT_75655 PE=3 SV=1	0	7.089	5.6338	2	2	2	1	497	54.6	8.09	4.79	2
FALSE	High	Master Protein	A0A100I6Z0	Putative glutathione-dependent formaldehyde-activating enzyme OS=Aspergillus niger OX=5061 GN=ABL_01149 PE=3 SV=1	0	7.075	19.3717	3	3	3	1	191	20.5	6.98	5.19	3
FALSE	High	Master Protein	A0A1M3TBG8	Uncharacterized protein OS=Aspergillus luchuensis CBS 106.47 OX=1137211 GN=ASPFODRAFT_49570 PE=4 SV=1	0	7.062	8.76494	2	3	2	1	251	26.9	6.77	8.36	2
FALSE	High	Master Protein	A0A146F7G7	Quinone oxidoreductase OS=Aspergillus luchuensis OX=1069201 GN=RIB2604_01004520 PE=4 SV=1	0	7.021	5.29801	2	2	2	1	453	49.7	7.14	6.45	2
FALSE	High	Master Protein	A0A1L9N9Q8	Uncharacterized protein OS=Aspergillus tubingensis CBS 134.48 OX=767770 GN=ASPTUDRAFT_53271 PE=4 SV=1	0	7.019	15	1	2	1	1	100	11.1	6.35	3.52	1
FALSE	High	Master Protein	A0A100IUC2	Purple acid phosphatase OS=Aspergillus niger OX=5061 GN=ABL_10080 PE=3 SV=1	0	6.985	5.22088	2	2	2	1	498	54.6	4.69	5.41	2
FALSE	High	Master Protein	A0A1M3TJQ9	Uncharacterized protein OS=Aspergillus luchuensis CBS 106.47 OX=1137211 GN=ASPFODRAFT_618865 PE=4 SV=1	0	6.981	7.45763	2	2	2	1	295	32.7	6.8	5.97	2
FALSE	High	Master Protein	A0A1L9WI23	Uncharacterized protein OS=Aspergillus aculeatus ATCC 16872 OX=690307 GN=ASPACDRAFT_47172 PE=4 SV=1	0	6.978	15.534	3	5	1	1	206	22.9	6.06	12.43	3
FALSE	High	Master Protein	A0A1L9MYU7	Uncharacterized protein OS=Aspergillus tubingensis CBS 134.48 OX=767770 GN=ASPTUDRAFT_32018 PE=4 SV=1	0	6.977	11.8812	1	2	1	1	101	11.3	9.41	5.57	1
FALSE	High	Master Protein	A2QK49	Aspergillus niger contig An04c0330, genomic contig OS=Aspergillus niger (strain CBS 513.88 / FGSC A1513) OX=425011 GN=An04g09360 PE=4 SV=1	0	6.963	7.91367	2	2	2	1	278	30.1	4.81	6.74	2
FALSE	High	Master Protein	G7XAN9	General amidase GmdA OS=Aspergillus kawachii (strain NBRC 4308) OX=1033177 GN=AKAW_02052 PE=4 SV=1	0	6.963	7.26351	3	3	3	1	592	64.1	6.05	4.75	3
FALSE	High	Master Protein	A0A117DVH6	Ring finger protein OS=Aspergillus niger OX=5061 GN=ABL_00963 PE=3 SV=1	0	6.959	2.33184	2	2	2	1	1115	120.8	6.64	6.34	2
FALSE	High	Master Protein	A0A1L9N1A6	Uncharacterized protein OS=Aspergillus tubingensis CBS 134.48 OX=767770 GN=ASPTUDRAFT_124442 PE=4 SV=1	0	6.931	6.7623	3	3	3	1	488	52.1	5.36	7.46	3
FALSE	High	Master Protein	G3YG03	Glucanase (Fragment) OS=Aspergillus niger (strain ATCC 1015 / CBS 113.46 / FGSC A1144 / LSHB Ac4 / NCTC 3858a / NRRL 328 / USDA 3528.7) OX=380704 GN=ASPNIDRAFT_133986 PE=3 SV=1	0	6.928	3.64078	1	2	1	1	412	43.4	4.35	7.52	1
FALSE	High	Master Protein	A0A100IR86	Non-specific serine/threonine protein kinase OS=Aspergillus niger OX=5061 GN=ABL_08361 PE=4 SV=1	0	6.923	3.53866	2	6	2	1	763	87.3	7.94	12.84	2
FALSE	High	Master Protein	A0A146FXS3	ATP synthase subunit d, mitochondrial OS=Aspergillus luchuensis OX=1069201 GN=RIB2604_03001550 PE=4 SV=1	0	6.909	15.8654	3	3	1	1	208	23.1	9.1	7.7	3
FALSE	High	Master Protein	A0A017SI28	T-complex protein 1 subunit alpha OS=Aspergillus ruber CBS 135680 OX=1388766 GN=EURHEDRAFT_476216 PE=3 SV=1	0	6.907	4.58554	2	2	2	1	567	61.5	6.33	4.77	2
FALSE	High	Master Protein	A0A100I3T1	60S acidic ribosomal protein P0 OS=Aspergillus niger OX=5061 GN=ABL_00241 PE=3 SV=1	0	6.804	7.37179	2	3	2	1	312	33.4	4.92	8.16	2
FALSE	High	Master Protein	A0A0U5GC79	Putative 4-aminobutyrate aminotransferase OS=Aspergillus calidoustus OX=454130 GN=ASPCAL13033 PE=3 SV=1	0	6.803	6.2249	3	3	1	1	498	55.3	8.78	5.22	3
FALSE	High	Master Protein	A0A2I1D4V1	Serine/threonine-protein phosphatase OS=Aspergillus campestris IBT 28561 OX=1392248 GN=P168DRAFT_141086 PE=3 SV=1	0	6.801	9.32945	3	3	3	1	343	39.4	5.99	6.63	3
FALSE	High	Master Protein	A0A1M3TZR5	Uncharacterized protein OS=Aspergillus luchuensis CBS 106.47 OX=1137211 GN=ASPFODRAFT_120568 PE=3 SV=1	0	6.772	5.48387	3	3	3	1	620	68.4	8.15	6.93	3
FALSE	High	Master Protein	A0A1R3RZD7	Uncharacterized protein OS=Aspergillus carbonarius (strain ITEM 5010) OX=602072 GN=ASPCADRAFT_512416 PE=3 SV=1	0	6.765	6.57084	3	3	2	1	487	54.2	6.1	7.61	3
FALSE	High	Master Protein	A0A100I2T3	ATP synthase subunit delta OS=Aspergillus niger OX=5061 GN=ABL_00288 PE=3 SV=1	0	6.715	8.06452	1	1	1	1	186	19.9	6.01	4.18	1
FALSE	High	Master Protein	A0A117E069	Pyroglutamyl peptidase type I OS=Aspergillus niger OX=5061 GN=ABL_04756 PE=4 SV=1	0	6.707	11.3553	3	3	3	1	273	29.5	5.45	4.16	3
FALSE	High	Master Protein	A0A100IF68	Retinol dehydrogenase 12 OS=Aspergillus niger OX=5061 GN=ABL_03461 PE=4 SV=1	0	6.707	11.1111	3	3	3	1	342	37.1	6.35	7.29	3
FALSE	High	Master Protein	A0A100I8Y6	Fumarylacetoacetate hydrolase OS=Aspergillus niger OX=5061 GN=ABL_01893 PE=4 SV=1	0	6.704	4.78469	2	3	2	1	418	44.6	5.83	7.9	2
FALSE	High	Master Protein	A0A1L9UD75	Uncharacterized protein OS=Aspergillus brasiliensis CBS 101740 OX=767769 GN=ASPBRDRAFT_182692 PE=3 SV=1	0	6.698	5.81162	2	2	2	1	499	51.4	4.55	5.19	2
FALSE	High	Master Protein	A0A0L1ISJ0	Protein transport protein SEC13 (Fragment) OS=Aspergillus nomius NRRL 13137 OX=1509407 GN=ANOM_009301 PE=3 SV=1	0	6.687	9.61538	3	3	3	1	312	34.4	6.09	4.24	3
FALSE	High	Master Protein	A0A0K8L818	60S ribosomal protein L24 OS=Aspergillus udagawae OX=91492 GN=AUD_3207 PE=4 SV=1	0	6.669	4.57413	3	4	3	1	634	69.5	9.8	9.36	3
FALSE	High	Master Protein	A0A100I7V8	L-arabitol dehydrogenase OS=Aspergillus niger OX=5061 GN=ABL_01603 PE=3 SV=1	0	6.657	8.80829	3	3	3	1	386	41.3	6.19	5.1	3
FALSE	High	Master Protein	A0A0L1J5Z6	Uncharacterized protein OS=Aspergillus nomius NRRL 13137 OX=1509407 GN=ANOM_005280 PE=3 SV=1	0	6.651	2.25352	2	3	2	1	1065	117.8	7.47	4.62	2
FALSE	High	Master Protein	A2QHP2	Aspergillus niger contig An04c0030, genomic contig OS=Aspergillus niger (strain CBS 513.88 / FGSC A1513) OX=425011 GN=An04g00560 PE=3 SV=1	0	6.64	18.9024	2	3	2	1	164	18.4	7.24	6.38	2
FALSE	High	Master Protein	A0A100IE58	Uncharacterized protein OS=Aspergillus niger OX=5061 GN=ABL_03218 PE=4 SV=1	0	6.596	4.38389	3	3	3	1	844	93.3	8.32	3.93	3
FALSE	High	Master Protein	A0A1M3TWQ0	Uncharacterized protein OS=Aspergillus luchuensis CBS 106.47 OX=1137211 GN=ASPFODRAFT_41549 PE=4 SV=1	0	6.589	10.7692	2	2	2	1	325	35	6.11	5.72	2
FALSE	High	Master Protein	A0A146F2C3	Ketoreductase OS=Aspergillus luchuensis OX=1069201 GN=RIB2604_00609030 PE=4 SV=1	0	6.574	9.1195	2	2	2	1	318	35.4	7.78	4.56	2
FALSE	High	Master Protein	A0A100ILQ8	RNA polymerase Rpb1 C-terminal repeat domain-containing protein OS=Aspergillus niger OX=5061 GN=ABL_06205 PE=4 SV=1	0	6.531	2.59542	3	3	3	1	1310	145.7	4.73	7.55	3
FALSE	High	Master Protein	A0A100IEM4	DNA damage-inducible v-SNARE binding protein Ddi1 OS=Aspergillus niger OX=5061 GN=ABL_03356 PE=4 SV=1	0	6.528	4.97427	2	2	2	1	583	63.4	5.97	3.2	2
FALSE	High	Master Protein	A0A124BXH6	Delta-1-pyrroline-5-carboxylate dehydrogenase PrnC OS=Aspergillus niger OX=5061 GN=ABL_05084 PE=3 SV=1	0	6.527	3.1614	3	3	3	1	1202	130.7	7.42	7.79	3
FALSE	High	Master Protein	A0A1L9N5Y7	Carboxylic ester hydrolase OS=Aspergillus tubingensis CBS 134.48 OX=767770 GN=ASPTUDRAFT_190898 PE=3 SV=1	0	6.523	3.67412	2	2	2	1	626	68.1	4.98	5.16	2
FALSE	High	Master Protein	A0A0U5G6D1	Putative Fumarylacetoacetate hydrolase family protein OS=Aspergillus calidoustus OX=454130 GN=ASPCAL10395 PE=4 SV=1	0	6.495	11.2069	2	2	2	1	232	25.8	7.44	5.98	2
FALSE	High	Master Protein	A0A1L9RZD2	Uncharacterized protein OS=Aspergillus wentii DTO 134E9 OX=1073089 GN=ASPWEDRAFT_166391 PE=4 SV=1	0	6.433	11.1111	1	1	1	1	135	15	6.87	3.69	1
FALSE	High	Master Protein	A0A0L1JF17	Uncharacterized protein OS=Aspergillus nomius NRRL 13137 OX=1509407 GN=ANOM_001830 PE=4 SV=1	0	6.43	2.21328	2	2	2	1	497	56.4	9	5.21	2
FALSE	High	Master Protein	A0A1L9N732	Uncharacterized protein OS=Aspergillus tubingensis CBS 134.48 OX=767770 GN=ASPTUDRAFT_926274 PE=4 SV=1	0	6.427	6.64062	2	2	1	1	512	57.8	5.27	4.7	2
FALSE	High	Master Protein	A0A117E1R3	Translation release factor eRF3 OS=Aspergillus niger OX=5061 GN=ABL_04968 PE=4 SV=1	0	6.424	3.84088	3	3	3	1	729	78	8.68	6.78	3
FALSE	High	Master Protein	A0A117E3U1	3-hydroxyisobutyrate dehydrogenase OS=Aspergillus niger OX=5061 GN=ABL_10279 PE=4 SV=1	0	6.423	6.1674	2	2	2	1	454	49.3	6.55	5.28	2
FALSE	High	Master Protein	A0A254TNE2	Tubulin/FtsZ family GTPase domain family protein OS=Aspergillus niger OX=5061 GN=CAN33_47340 PE=3 SV=1	0	6.383	2.47453	1	1	1	1	687	75.4	5.71	3.56	1
FALSE	High	Master Protein	A0A2P2HBQ4	Apoptosis-inducing factor OS=Aspergillus flavus (strain ATCC MYA-384 / AF70) OX=1392242 GN=AFLA70_128g002541 PE=4 SV=1	0	6.378	4.60624	3	4	3	1	673	72.5	8.7	11.23	3
FALSE	High	Master Protein	A0A1M3T4Q4	Inosine triphosphate pyrophosphatase OS=Aspergillus luchuensis CBS 106.47 OX=1137211 GN=ASPFODRAFT_359873 PE=3 SV=1	0	6.336	11.828	2	2	2	1	186	20.6	5.68	4.95	2
FALSE	High	Master Protein	A0A100IRD4	2,4-dihydroxyhept-2-ene-1,7-dioic acid aldolase OS=Aspergillus niger OX=5061 GN=ABL_08588 PE=4 SV=1	0	6.33	8.39695	2	3	2	1	262	28.1	5.96	7.71	2
FALSE	High	Master Protein	A0A124BYH6	GDSL lipase/acylhydrolase family protein OS=Aspergillus niger OX=5061 GN=ABL_08177 PE=4 SV=1	0	6.31	6.19718	2	3	2	1	355	39.9	5.16	8.19	2
FALSE	High	Master Protein	A0A1F7ZKJ7	Acetyl-CoA acetyltransferase IA (Fragment) OS=Aspergillus bombycis OX=109264 GN=ABOM_011259 PE=3 SV=1	0	6.298	7.2093	2	2	2	1	430	44.2	6.87	5.32	2
FALSE	High	Master Protein	A0A1R3R758	Uncharacterized protein OS=Aspergillus carbonarius (strain ITEM 5010) OX=602072 GN=ASPCADRAFT_179287 PE=4 SV=1	0	6.276	5.61798	2	2	2	1	445	48.2	6.42	4.76	2
FALSE	High	Master Protein	A0A1L9NC60	Uncharacterized protein OS=Aspergillus tubingensis CBS 134.48 OX=767770 GN=ASPTUDRAFT_495968 PE=4 SV=1	0	6.267	5.22023	3	4	3	1	613	69.2	5.44	7.7	3
FALSE	High	Master Protein	A0A117E493	Nitrogen assimilation transcription factor NirA OS=Aspergillus niger OX=5061 GN=ABL_09377 PE=4 SV=1	0	6.25	3.087	3	3	3	1	1069	118.9	7.21	4.99	3
FALSE	High	Master Protein	A0A146F2H6	Carboxylic ester hydrolase OS=Aspergillus luchuensis OX=1069201 GN=RIB2604_00700420 PE=3 SV=1	0	6.238	7.30435	3	3	3	1	575	62.5	5.02	4.3	3
FALSE	High	Master Protein	A0A1L9PL65	Uncharacterized protein OS=Aspergillus versicolor CBS 583.65 OX=1036611 GN=ASPVEDRAFT_664982 PE=4 SV=1	0	6.237	8.30565	2	2	2	1	301	33.4	6.95	5.54	2
FALSE	High	Master Protein	A0A1M3T0P8	Uncharacterized protein OS=Aspergillus luchuensis CBS 106.47 OX=1137211 GN=ASPFODRAFT_212740 PE=4 SV=1	0	6.236	6.11028	4	4	4	1	671	74.5	6.57	8.98	4
FALSE	High	Master Protein	A0A146FNT7	Voltage-gated K+ channel beta subunit OS=Aspergillus luchuensis OX=1069201 GN=RIB2604_02105750 PE=4 SV=1	0	6.213	6.81199	2	2	2	1	367	41.2	7.42	4.63	2
FALSE	High	Master Protein	A0A100IB18	V-type proton ATPase subunit a OS=Aspergillus niger OX=5061 GN=ABL_02399 PE=3 SV=1	0	6.21	3.64706	3	3	3	1	850	96.8	5.59	5.49	3
FALSE	High	Master Protein	A0A146FHT1	Peptidylprolyl isomerase OS=Aspergillus luchuensis OX=1069201 GN=RIB2604_01902830 PE=4 SV=1	0	6.206	21.0526	2	3	2	1	114	12.2	6.02	7.91	2
FALSE	High	Master Protein	A0A100ISI7	Cytochrome P450 OS=Aspergillus niger OX=5061 GN=ABL_08977 PE=3 SV=1	0	6.185	4.08163	2	2	2	1	539	61.1	7.53	6.04	2
FALSE	High	Master Protein	A2QA64	Probable beta-galactosidase B OS=Aspergillus niger (strain CBS 513.88 / FGSC A1513) OX=425011 GN=lacB PE=3 SV=2	0	6.162	2.65487	2	2	2	1	1017	111.7	5	4.71	2
FALSE	High	Master Protein	A0A1L9NIG3	Arginine biosynthesis bifunctional protein ArgJ, mitochondrial OS=Aspergillus tubingensis CBS 134.48 OX=767770 GN=ASPTUDRAFT_49943 PE=3 SV=1	0	6.161	7.47863	3	3	3	1	468	49.1	6.33	5.05	3
FALSE	High	Master Protein	G3Y1E0	Proteasome endopeptidase complex OS=Aspergillus niger (strain ATCC 1015 / CBS 113.46 / FGSC A1144 / LSHB Ac4 / NCTC 3858a / NRRL 328 / USDA 3528.7) OX=380704 GN=ASPNIDRAFT_52397 PE=3 SV=1	0	6.154	7.37463	2	3	2	1	339	36.9	7.12	6.46	2
FALSE	High	Master Protein	A0A2K5A2P1	Uncharacterized protein OS=Aspergillus niger OX=5061 GN=ATCC64974_39060 PE=3 SV=1	0	6.148	9.11458	3	4	3	1	384	40.9	6.68	8	3
FALSE	High	Master Protein	A0A0K8L5P6	Hydrophobin OS=Aspergillus udagawae OX=91492 GN=AUD_2550 PE=3 SV=1	0	6.068	8.84354	2	9	1	1	147	15	4.53	28.04	2
FALSE	High	Master Protein	A0A146FFJ5	Glutathione S-transferase OS=Aspergillus luchuensis OX=1069201 GN=RIB2604_01800480 PE=4 SV=1	0	6.046	16.5854	3	3	3	1	205	23.8	5.52	7.29	3
FALSE	High	Master Protein	A0A117E376	ThiJ/PfpI family protein OS=Aspergillus niger OX=5061 GN=ABL_09346 PE=4 SV=1	0	6.043	10.2564	2	3	2	1	234	24.8	5.54	7.72	2
FALSE	High	Master Protein	A0A2K5AM88	Uncharacterized protein OS=Aspergillus niger OX=5061 GN=ATCC64974_107410 PE=4 SV=1	0	6.036	8.08081	1	2	1	1	198	20.5	6.35	5.71	1
FALSE	High	Master Protein	A0A1M3TZR2	Uncharacterized protein OS=Aspergillus luchuensis CBS 106.47 OX=1137211 GN=ASPFODRAFT_39440 PE=3 SV=1	0	6.02	11.4155	3	4	3	1	219	24.1	5.49	9.93	3
FALSE	High	Master Protein	G8B4N8	Histone H4 (Fragment) OS=Cloeosiphon aspergillus OX=210794 GN=h4 PE=3 SV=1	0	6.006	37.7358	2	4	1	1	53	6	10.98	11.56	2
FALSE	High	Master Protein	A0A1F8A4P0	Uncharacterized protein OS=Aspergillus bombycis OX=109264 GN=ABOM_005114 PE=3 SV=1	0	6.001	17.6923	2	2	2	1	130	14.7	9.82	6.74	2
FALSE	High	Master Protein	A0A0U5G793	Putative Hsp70 chaperone BiP/Kar2 OS=Aspergillus calidoustus OX=454130 GN=ASPCAL06541 PE=3 SV=1	0	6	2.96736	2	11	1	1	674	73.6	4.94	24.49	2
FALSE	High	Master Protein	A0A1L9RXM1	Uroporphyrinogen decarboxylase OS=Aspergillus wentii DTO 134E9 OX=1073089 GN=ASPWEDRAFT_169533 PE=3 SV=1	0	5.968	4.94505	2	3	2	1	364	40.8	6.87	5.1	2
FALSE	High	Master Protein	A0A1M3T604	Cytosolic Fe-S cluster assembly factor CFD1 OS=Aspergillus luchuensis CBS 106.47 OX=1137211 GN=CFD1 PE=3 SV=1	0	5.933	4.58839	2	2	2	1	741	79.5	5.01	2.83	2
FALSE	High	Master Protein	A0A2P2HTY5	Cell polarity protein OS=Aspergillus flavus (strain ATCC MYA-384 / AF70) OX=1392242 GN=AFLA70_88g003051 PE=4 SV=1	0	5.931	1.32626	2	2	2	1	1885	208.8	7.83	5.01	2
FALSE	High	Master Protein	A0A146F6E9	Glucose-methanol-choline oxidoreductase OS=Aspergillus luchuensis OX=1069201 GN=RIB2604_01005190 PE=4 SV=1	0	5.927	6.29685	3	3	3	1	667	74.5	7.14	6.3	3
FALSE	High	Master Protein	A0A146FXQ0	Similar to An03g04840 OS=Aspergillus luchuensis OX=1069201 GN=RIB2604_03100950 PE=4 SV=1	0	5.856	5.53506	1	1	1	1	271	28.8	4.61	3.65	1
FALSE	High	Master Protein	Q2USL7	Uncharacterized protein OS=Aspergillus oryzae (strain ATCC 42149 / RIB 40) OX=510516 GN=AO090005000378 PE=4 SV=1	0	5.853	3.13808	1	2	1	1	478	52.7	10.4	3.87	1
FALSE	High	Master Protein	A0A1M3T717	Uncharacterized protein OS=Aspergillus luchuensis CBS 106.47 OX=1137211 GN=ASPFODRAFT_63745 PE=4 SV=1	0	5.848	14.7887	2	2	2	1	142	16.3	5.54	5.18	2
FALSE	High	Master Protein	A0A0F8XBN8	60S ribosomal protein OS=Aspergillus rambellii OX=308745 GN=ARAM_006058 PE=3 SV=1	0	5.847	10.7527	2	3	2	1	186	21.6	11.18	9.67	2
FALSE	High	Master Protein	A0A1L9NEM5	Uncharacterized protein OS=Aspergillus tubingensis CBS 134.48 OX=767770 GN=ASPTUDRAFT_51358 PE=4 SV=1	0	5.826	8	2	2	2	1	300	31.6	6.37	5.62	2
FALSE	High	Master Protein	A0A2K4ZY90	Uncharacterized protein OS=Aspergillus niger OX=5061 GN=ATCC64974_23430 PE=3 SV=1	0	5.823	1.92308	3	3	3	1	1872	205.3	6.23	3.99	3
FALSE	High	Master Protein	A0A146F2E5	Phosphoesterase superfamily protein OS=Aspergillus luchuensis OX=1069201 GN=RIB2604_00700260 PE=4 SV=1	0	5.815	5.72687	2	2	2	1	454	49.7	5.5	4.33	2
FALSE	High	Master Protein	A0A2V5H4Y5	RNA-binding domain-containing protein OS=Aspergillus violaceofuscus CBS 115571 OX=1450538 GN=BO99DRAFT_484167 PE=4 SV=1	0	5.812	6.13333	2	4	2	1	375	39.5	5.78	9.5	2
FALSE	High	Master Protein	A0A100IAT1	Carboxylic ester hydrolase OS=Aspergillus niger OX=5061 GN=ABL_02339 PE=3 SV=1	0	5.811	4.52962	2	3	1	1	574	62.7	4.58	6.81	2
FALSE	High	Master Protein	G3Y238	Putative translation initiation factor 2, beta subunit OS=Aspergillus niger (strain ATCC 1015 / CBS 113.46 / FGSC A1144 / LSHB Ac4 / NCTC 3858a / NRRL 328 / USDA 3528.7) OX=380704 GN=ASPNIDRAFT_52431 PE=4 SV=1	0	5.808	3.49854	1	2	1	1	343	38	8.57	4.99	1
FALSE	High	Master Protein	A0A146FG43	Glucose-methanol-choline oxidoreductase OS=Aspergillus luchuensis OX=1069201 GN=RIB2604_01805880 PE=3 SV=1	0	5.803	2.47117	1	1	1	1	607	65.5	5.44	3.15	1
FALSE	High	Master Protein	A0A100II62	Protein SEY1 OS=Aspergillus niger OX=5061 GN=SEY1 PE=3 SV=1	0	5.783	1.09073	2	2	2	1	2017	223.4	5.66	4.87	2
FALSE	High	Master Protein	A2QAU7	Aspergillus niger contig An01c0390, genomic contig OS=Aspergillus niger (strain CBS 513.88 / FGSC A1513) OX=425011 GN=An01g12810 PE=4 SV=1	0	5.764	11.7117	2	2	2	1	222	25	8.87	4.62	2
FALSE	High	Master Protein	A0A100IHZ5	Unnamed protein product OS=Aspergillus niger OX=5061 GN=ABL_04251 PE=4 SV=1	0	5.749	3.09278	3	3	3	1	1067	117.9	7.25	6.35	3
FALSE	High	Master Protein	A0A124BY88	DNA repair protein Rad18 OS=Aspergillus niger OX=5061 GN=ABL_07458 PE=4 SV=1	0	5.732	1.91045	3	3	3	1	1675	190.1	6.57	5.65	3
FALSE	High	Master Protein	A0A117DYS1	SNARE domain protein OS=Aspergillus niger OX=5061 GN=ABL_02109 PE=3 SV=1	0	5.724	8.42491	2	2	2	1	273	31	5.15	4.37	2
FALSE	High	Master Protein	A0A117E0U5	Serine peptidase, family S28 OS=Aspergillus niger OX=5061 GN=ABL_05671 PE=4 SV=1	0	5.718	2.31317	1	1	1	1	562	61.8	4.48	3.01	1
FALSE	High	Master Protein	A0A124BXQ3	26S protease subunit rpt4 OS=Aspergillus niger OX=5061 GN=ABL_05759 PE=3 SV=1	0	5.697	6.42674	2	2	1	1	389	43.4	8.18	4.87	2
FALSE	High	Master Protein	A0A100IJ87	Isoleucyl-tRNA synthetase, cytoplasmic OS=Aspergillus niger OX=5061 GN=ABL_04536 PE=3 SV=1	0	5.68	2.87837	3	3	3	1	1077	124.3	6.34	7.07	3
FALSE	High	Master Protein	A0A1R3RB91	Uncharacterized protein OS=Aspergillus carbonarius (strain ITEM 5010) OX=602072 GN=ASPCADRAFT_9174 PE=4 SV=1	0	5.658	9.92366	1	5	1	1	131	13.8	4.41	12.33	1
FALSE	High	Master Protein	A0A100ICU6	ABC transporter OS=Aspergillus niger OX=5061 GN=ABL_02825 PE=4 SV=1	0	5.641	1.92132	2	2	2	1	1093	120.1	5.6	4.72	2
FALSE	High	Master Protein	A0A1M3TG41	Uncharacterized protein OS=Aspergillus luchuensis CBS 106.47 OX=1137211 GN=ASPFODRAFT_33374 PE=4 SV=1	0	5.64	6.87961	3	3	3	1	407	44.7	7.8	6.59	3
FALSE	High	Master Protein	A0A254U6S5	Cytochrome P450 family protein OS=Aspergillus niger OX=5061 GN=CAN33_28535 PE=3 SV=1	0	5.638	1.92555	1	2	1	1	779	88.5	6.21	5.66	1
FALSE	High	Master Protein	A0A1L9N8M2	Uncharacterized protein OS=Aspergillus tubingensis CBS 134.48 OX=767770 GN=ASPTUDRAFT_189586 PE=4 SV=1	0	5.637	9.01639	2	2	2	1	244	27.5	7.66	3.77	2
FALSE	High	Master Protein	A0A2I2G2C8	Putative Xaa-Pro aminopeptidase pepP OS=Aspergillus steynii IBT 23096 OX=1392250 GN=P170DRAFT_428258 PE=3 SV=1	0	5.637	2.36052	1	2	1	1	466	51.8	5.72	4.12	1
FALSE	High	Master Protein	A0A117DYL2	Exportin-t OS=Aspergillus niger OX=5061 GN=ABL_03239 PE=4 SV=1	0	5.63	0.94518	1	1	1	1	1587	175.9	5.17	3.42	1
FALSE	High	Master Protein	A0A1L9N7Z6	Uncharacterized protein OS=Aspergillus tubingensis CBS 134.48 OX=767770 GN=ASPTUDRAFT_577483 PE=4 SV=1	0	5.603	3.31858	1	3	1	1	452	49.3	5.11	7.33	1
FALSE	High	Master Protein	G7XER2	Dimeric dihydrodiol dehydrogenase OS=Aspergillus kawachii (strain NBRC 4308) OX=1033177 GN=AKAW_03717 PE=4 SV=1	0	5.587	9.90338	3	3	3	1	414	46	6.42	4.43	3
FALSE	High	Master Protein	G7XQL0	NACHT domain protein OS=Aspergillus kawachii (strain NBRC 4308) OX=1033177 GN=AKAW_07164 PE=4 SV=1	0	5.581	1.13189	2	2	2	1	2032	229.7	6.47	4.42	2
FALSE	High	Master Protein	A0A117DYP4	40S ribosomal protein S6 OS=Aspergillus niger OX=5061 GN=ABL_02441 PE=3 SV=1	0	5.568	13.0802	2	2	2	1	237	27.1	10.9	4.42	2
FALSE	High	Master Protein	A0A100IPX5	NADH-ubiquinone oxidoreductase 213 kDa subunit OS=Aspergillus niger OX=5061 GN=ABL_07868 PE=4 SV=1	0	5.565	7.17949	1	1	1	1	195	20.9	8.38	3.02	1
FALSE	High	Master Protein	A0A2I2F4D8	Cu,Zn superoxide dismutase-like protein OS=Aspergillus candidus OX=41067 GN=BDW47DRAFT_62212 PE=4 SV=1	0	5.55	5.47264	1	3	1	1	201	21.3	5.92	8.05	1
FALSE	High	Master Protein	A0A1L9NMT7	Uncharacterized protein OS=Aspergillus tubingensis CBS 134.48 OX=767770 GN=ASPTUDRAFT_250486 PE=4 SV=1	0	5.543	4.79616	2	3	2	1	417	45.3	4.92	6.93	2
FALSE	High	Master Protein	A0A146G0L5	Norsolorinic acid reductase OS=Aspergillus luchuensis OX=1069201 GN=RIB2604_04000320 PE=4 SV=1	0	5.537	6.78851	2	2	2	1	383	42.5	6.81	4.25	2
FALSE	High	Master Protein	A0A1L9UWD1	Uncharacterized protein OS=Aspergillus brasiliensis CBS 101740 OX=767769 GN=ASPBRDRAFT_26418 PE=4 SV=1	0	5.536	13.6232	4	5	4	1	345	37.6	6.24	8.45	4
FALSE	High	Master Protein	G3YBH9	40S ribosomal protein S27 (Fragment) OS=Aspergillus niger (strain ATCC 1015 / CBS 113.46 / FGSC A1144 / LSHB Ac4 / NCTC 3858a / NRRL 328 / USDA 3528.7) OX=380704 GN=ASPNIDRAFT_179599 PE=3 SV=1	0	5.508	20	1	2	1	1	80	8.6	9.03	6.88	1
FALSE	High	Master Protein	A0A1L9NL90	Uncharacterized protein OS=Aspergillus tubingensis CBS 134.48 OX=767770 GN=ASPTUDRAFT_51912 PE=4 SV=1	0	5.5	8.05687	3	3	3	1	422	47	8.56	5.9	3
FALSE	High	Master Protein	A0A146FQT6	Eukaryotic translation initiation factor 3 subunit A OS=Aspergillus luchuensis OX=1069201 GN=TIF32 PE=3 SV=1	0	5.498	2.36967	2	2	2	1	1055	120.5	9.41	6.39	2
FALSE	High	Master Protein	A2QB20	Aspergillus niger contig An01c0430, genomic contig OS=Aspergillus niger (strain CBS 513.88 / FGSC A1513) OX=425011 GN=An01g13580 PE=4 SV=1	0	5.486	6.23229	2	2	2	1	353	39.6	5.83	6.55	2
FALSE	High	Master Protein	A0A2K5A558	Uncharacterized protein OS=Aspergillus niger OX=5061 GN=ATCC64974_48020 PE=3 SV=1	0	5.453	2.89017	2	3	2	1	692	79.6	8.32	8.82	2
FALSE	High	Master Protein	A0A1L9N3Q0	Uncharacterized protein OS=Aspergillus tubingensis CBS 134.48 OX=767770 GN=ASPTUDRAFT_122784 PE=4 SV=1	0	5.449	7.88732	2	2	2	1	355	38.8	6.46	4.91	2
FALSE	High	Master Protein	A0A100IUD0	Eukaryotic translation initiation factor 3 subunit I OS=Aspergillus niger OX=5061 GN=TIF34 PE=3 SV=1	0	5.428	7.0028	2	2	2	1	357	40	7.14	4.27	2
FALSE	High	Master Protein	A0A117E086	Xylanase D OS=Aspergillus niger OX=5061 GN=ABL_04846 PE=3 SV=1	0	5.415	4.58453	1	3	1	1	349	38.7	5.05	7.72	1
FALSE	High	Master Protein	A0A100IT92	YkgB OS=Aspergillus niger OX=5061 GN=ABL_09565 PE=4 SV=1	0	5.395	6.28141	2	2	2	1	398	42.5	6.11	6.33	2
FALSE	High	Master Protein	A0A1M3TG60	Uncharacterized protein OS=Aspergillus luchuensis CBS 106.47 OX=1137211 GN=ASPFODRAFT_207608 PE=4 SV=1	0	5.394	4.7619	2	3	2	1	714	74.9	6.98	1.91	2
FALSE	High	Master Protein	A0A146FHU4	Beta-mannanase OS=Aspergillus luchuensis OX=1069201 GN=RIB2604_01807470 PE=3 SV=1	0	5.387	3.52645	1	1	1	1	397	43	4.6	3.18	1
FALSE	High	Master Protein	A2QQ10	Eukaryotic translation initiation factor 3 subunit F OS=Aspergillus niger (strain CBS 513.88 / FGSC A1513) OX=425011 GN=An08g00880 PE=3 SV=1	0	5.383	6.13333	2	3	2	1	375	40.9	5.05	7.1	2
FALSE	High	Master Protein	Q0CPN1	Proteasome subunit beta type OS=Aspergillus terreus (strain NIH 2624 / FGSC A1156) OX=341663 GN=ATEG_04353 PE=3 SV=1	0	5.347	14.3426	3	3	3	1	251	27.2	5.72	6.96	3
FALSE	High	Master Protein	A0A1L9UWI9	Uncharacterized protein OS=Aspergillus brasiliensis CBS 101740 OX=767769 GN=ASPBRDRAFT_117017 PE=4 SV=1	0	5.339	2.75634	2	2	2	1	907	94.2	6.55	4.56	2
FALSE	High	Master Protein	A0A1M3TRV9	Uncharacterized protein OS=Aspergillus luchuensis CBS 106.47 OX=1137211 GN=ASPFODRAFT_204416 PE=3 SV=1	0	5.335	8.35655	3	3	3	1	359	38.9	6.71	6.95	3
FALSE	High	Master Protein	A0A1L9N4W9	Uncharacterized protein OS=Aspergillus tubingensis CBS 134.48 OX=767770 GN=ASPTUDRAFT_190681 PE=4 SV=1	0	5.333	4.85232	2	2	2	1	474	54	6.13	4.61	2
FALSE	High	Master Protein	A0A2K5A427	Protein ROT1 OS=Aspergillus niger OX=5061 GN=ATCC64974_44270 PE=3 SV=1	0	5.324	6.72269	1	1	1	1	238	26.3	5.81	1.8	1
FALSE	High	Master Protein	A0A117E3J5	Ribosomal protein L19 OS=Aspergillus niger OX=5061 GN=ABL_09859 PE=3 SV=1	0	5.323	0.91247	3	3	3	1	2959	323.8	6.77	6.51	3
FALSE	High	Master Protein	A0A124BXN7	Steroid monooxygenase OS=Aspergillus niger OX=5061 GN=ABL_05624 PE=4 SV=1	0	5.321	1.46956	2	3	2	1	1429	157.2	5.26	7.91	2
FALSE	High	Master Protein	A0A254TM29	Uncharacterized protein OS=Aspergillus niger OX=5061 GN=CAN33_45000 PE=4 SV=1	0	5.312	12.6316	2	2	2	1	190	21.9	9.2	5.72	2
FALSE	High	Master Protein	A0A100IS51	Phosphotransferase OS=Aspergillus niger OX=5061 GN=ABL_08782 PE=3 SV=1	0	5.306	5.10204	2	2	2	1	490	54.1	5.33	4.87	2
FALSE	High	Master Protein	A0A146FSH5	Similar to An08g04540 OS=Aspergillus luchuensis OX=1069201 GN=RIB2604_02600570 PE=4 SV=1	0	5.302	4.55927	1	2	1	1	329	37	5.25	3.58	1
FALSE	High	Master Protein	A0A2K5A6Z9	Uncharacterized protein OS=Aspergillus niger OX=5061 GN=ATCC64974_54390 PE=4 SV=1	0	5.286	10.7438	1	3	1	1	121	12.6	8.46	7.17	1
FALSE	High	Master Protein	A0A146FCL2	Cysteine synthase (o-acetylserine) OS=Aspergillus luchuensis OX=1069201 GN=RIB2604_01709390 PE=4 SV=1	0	5.284	6.1828	2	2	2	1	372	40	8.47	4.3	2
FALSE	High	Master Protein	A0A2I1D4K9	Nagb/rpia/CoA transferase-like protein OS=Aspergillus campestris IBT 28561 OX=1392248 GN=P168DRAFT_235324 PE=4 SV=1	0	5.273	1.52284	1	2	1	1	788	86.3	8.07	4.52	1
FALSE	High	Master Protein	A0A1M3T213	Uncharacterized protein OS=Aspergillus luchuensis CBS 106.47 OX=1137211 GN=ASPFODRAFT_53006 PE=4 SV=1	0	5.256	18.6667	1	1	1	1	75	8.6	5.68	3.07	1
FALSE	High	Master Protein	A0A100IE70	Phenylalanyl-tRNA synthetase beta chain cytoplasmic OS=Aspergillus niger OX=5061 GN=ABL_02896 PE=4 SV=1	0	5.251	3.28185	1	1	1	1	518	58.2	6.68	2.74	1
FALSE	High	Master Protein	A0A117E2H8	Choline oxidase OS=Aspergillus niger OX=5061 GN=ABL_06228 PE=4 SV=1	0	5.248	4.33996	2	2	2	1	553	61.4	6.43	4.01	2
FALSE	High	Master Protein	A0A100IBX6	Epoxide hydrolase OS=Aspergillus niger OX=5061 GN=ABL_02632 PE=3 SV=1	0	5.238	2.08644	3	3	3	1	1342	149	6.19	6.15	3
FALSE	High	Master Protein	A0A1L9U2M5	Uncharacterized protein OS=Aspergillus brasiliensis CBS 101740 OX=767769 GN=ASPBRDRAFT_35578 PE=4 SV=1	0	5.227	1.67742	1	1	1	1	775	87.7	7.5	3.45	1
FALSE	High	Master Protein	A0A117DXR1	Endonuclease/exonuclease/phosphatase family protein OS=Aspergillus niger OX=5061 GN=ABL_02625 PE=4 SV=1	0	5.201	4.02685	1	1	1	1	298	33.6	6.34	3.27	1
FALSE	High	Master Protein	A0A1L9MU41	Uncharacterized protein OS=Aspergillus tubingensis CBS 134.48 OX=767770 GN=ASPTUDRAFT_59269 PE=4 SV=1	0	5.189	7.69231	2	2	2	1	260	28.9	6.05	4.86	2
FALSE	High	Master Protein	A0A2K4ZXD8	Uncharacterized protein OS=Aspergillus niger OX=5061 GN=ATCC64974_21050 PE=4 SV=1	0	5.181	10.4972	2	3	2	1	181	19.9	9.47	6.54	2
FALSE	High	Master Protein	A0A100IAQ2	Flavin-binding monooxygenase-like protein OS=Aspergillus niger OX=5061 GN=ABL_02328 PE=4 SV=1	0	5.176	3.90244	2	2	2	1	615	68.6	6.09	5.05	2
FALSE	High	Master Protein	A0A100IPR0	Extracellular invertase OS=Aspergillus niger OX=5061 GN=ABL_07765 PE=3 SV=1	0	5.149	2.07006	1	2	1	1	628	68	5.08	3.44	1
FALSE	High	Master Protein	A0A100IJ01	Homogentisate 1,2-dioxygenase OS=Aspergillus niger OX=5061 GN=ABL_04775 PE=4 SV=1	0	5.139	5.45852	2	2	2	1	458	51.3	6.2	5.9	2
FALSE	High	Master Protein	A0A1S9DAR4	S-(hydroxymethyl)glutathione dehydrogenase OS=Aspergillus oryzae OX=5062 GN=OAory_01017500 PE=3 SV=1	0	5.132	2.60304	1	1	1	1	461	49.8	6.86	3.21	1
FALSE	High	Master Protein	A0A146FK32	Gluconate 5-dehydrogenase OS=Aspergillus luchuensis OX=1069201 GN=RIB2604_02008160 PE=3 SV=1	0	5.13	8.24742	2	2	2	1	291	31.8	7.85	5.24	2
FALSE	High	Master Protein	A0A100IES2	Glutathione S-transferase OS=Aspergillus niger OX=5061 GN=ABL_03381 PE=4 SV=1	0	5.126	10.084	2	2	2	1	238	26.3	6.89	4.21	2
FALSE	High	Master Protein	G7Y1P6	Uncharacterized protein OS=Aspergillus kawachii (strain NBRC 4308) OX=1033177 GN=AKAW_11217 PE=4 SV=1	0	5.122	6.32411	3	3	3	1	506	57.4	6.58	4.62	3
FALSE	High	Master Protein	A0A117E4E4	Proteasome regulatory particle subunit OS=Aspergillus niger OX=5061 GN=ABL_09243 PE=4 SV=1	0	5.121	8.63309	2	2	2	1	278	30.9	4.89	4.88	2
FALSE	High	Master Protein	A0A100IGP4	Sarcosine oxidase OS=Aspergillus niger OX=5061 GN=ABL_03871 PE=4 SV=1	0	5.063	2.31481	1	2	1	1	432	48.3	5.85	4.62	1
FALSE	High	Master Protein	A0A254TWX8	Flavin reductase like domain family protein OS=Aspergillus niger OX=5061 GN=ATCC64974_12540 PE=4 SV=1	0	5.05	6.98413	2	2	2	1	315	34.6	9.1	4.3	2
FALSE	High	Master Protein	A0A100IPW8	Peroxidase OS=Aspergillus niger OX=5061 GN=ABL_07813 PE=4 SV=1	0	5.041	4.49438	1	1	1	1	267	29.6	5.92	3.71	1
FALSE	High	Master Protein	A0A100ICX1	Allergen Asp f 4 OS=Aspergillus niger OX=5061 GN=ABL_02873 PE=4 SV=1	0	5.038	4.26829	1	1	1	1	328	34	5.33	3.71	1
FALSE	High	Master Protein	A0A100IU61	Dynamin-2 OS=Aspergillus niger OX=5061 GN=ABL_09832 PE=3 SV=1	0	5.037	2.09391	3	3	3	1	1576	172.2	5.44	5.78	3
FALSE	High	Master Protein	A0A1R3S1F2	Uncharacterized protein OS=Aspergillus carbonarius (strain ITEM 5010) OX=602072 GN=ASPCADRAFT_202386 PE=3 SV=1	0	5.031	2.45184	1	1	1	1	571	61.5	5.3	3.16	1
FALSE	High	Master Protein	A0A1M3TA21	Uncharacterized protein OS=Aspergillus luchuensis CBS 106.47 OX=1137211 GN=ASPFODRAFT_73045 PE=4 SV=1	0	5.02	5.53191	1	1	1	1	235	25.7	5.2	2.59	1
FALSE	High	Master Protein	A0A146F2W4	Phospho-2-dehydro-3-deoxyheptonate aldolase OS=Aspergillus luchuensis OX=1069201 GN=RIB2604_00701710 PE=3 SV=1	0	5.011	6.73854	2	2	2	1	371	40.1	6.74	4.7	2
FALSE	High	Master Protein	A0A146F3Z8	Integral membrane protein OS=Aspergillus luchuensis OX=1069201 GN=RIB2604_00802820 PE=4 SV=1	0	5.007	2.04082	1	1	1	1	637	69.7	8.13	3.25	1
FALSE	High	Master Protein	G3Y8Y3	Uncharacterized protein OS=Aspergillus niger (strain ATCC 1015 / CBS 113.46 / FGSC A1144 / LSHB Ac4 / NCTC 3858a / NRRL 328 / USDA 3528.7) OX=380704 GN=ASPNIDRAFT_57034 PE=4 SV=1	0	5.005	4.0367	2	2	2	1	545	60.8	7.72	6.28	2
FALSE	High	Master Protein	A2QVR8	Lysine--tRNA ligase OS=Aspergillus niger (strain CBS 513.88 / FGSC A1513) OX=425011 GN=An11g02400 PE=3 SV=1	0	4.995	4.85437	3	3	3	1	618	70.4	5.9	4.38	3
FALSE	High	Master Protein	A0A0F0IH70	Glycosyl hydrolase family 76 OS=Aspergillus parasiticus (strain ATCC 56775 / NRRL 5862 / SRRC 143 / SU-1) OX=1403190 GN=P875_00117406 PE=3 SV=1	0	4.991	2.14932	2	2	2	1	884	97.9	5.34	5.67	2
FALSE	High	Master Protein	A0A1S9DTC0	Cell division/GTP binding protein OS=Aspergillus oryzae OX=5062 GN=OAory_01000100 PE=3 SV=1	0	4.985	8.26446	2	2	2	1	363	41.2	7.97	4.27	2
FALSE	High	Master Protein	A0A1L9X9V5	Uncharacterized protein OS=Aspergillus aculeatus ATCC 16872 OX=690307 GN=ASPACDRAFT_1852091 PE=4 SV=1	0	4.972	4.54545	1	1	1	1	308	33	8.85	2.69	1
FALSE	High	Master Protein	A0A1L9MXK3	Acetyltransferase component of pyruvate dehydrogenase complex OS=Aspergillus tubingensis CBS 134.48 OX=767770 GN=ASPTUDRAFT_77047 PE=3 SV=1	0	4.967	3.49819	2	2	2	1	829	90.2	8.18	5.7	2
FALSE	High	Master Protein	A0A124BXS7	Oxidoreductase, 2-nitropropane dioxygenase family OS=Aspergillus niger OX=5061 GN=ABL_05984 PE=4 SV=1	0	4.965	5.35211	2	2	2	1	355	37.6	7.56	4.29	2
FALSE	High	Master Protein	A2QVC3	Uncharacterized protein OS=Aspergillus niger (strain CBS 513.88 / FGSC A1513) OX=425011 GN=An11g00890 PE=4 SV=1	0	4.96	9.89583	1	1	1	1	192	20	7.71	2.44	1
FALSE	High	Master Protein	A0A100IL48	NPP1 domain protein OS=Aspergillus niger OX=5061 GN=ABL_05556 PE=4 SV=1	0	4.958	11.9522	3	3	3	1	251	26.8	4.63	6.8	3
FALSE	High	Master Protein	A0A1L9RWE9	Eukaryotic translation initiation factor 3 subunit E OS=Aspergillus wentii DTO 134E9 OX=1073089 GN=INT6 PE=3 SV=1	0	4.949	4.03397	2	2	2	1	471	54.3	5.43	4.59	2
FALSE	High	Master Protein	A0A1M3TUR3	Uncharacterized protein OS=Aspergillus luchuensis CBS 106.47 OX=1137211 GN=ASPFODRAFT_203137 PE=4 SV=1	0	4.936	9.39086	3	3	3	1	394	43.4	6.47	5.71	3
FALSE	High	Master Protein	A2QXP0	Aspergillus niger contig An11c0330, genomic contig OS=Aspergillus niger (strain CBS 513.88 / FGSC A1513) OX=425011 GN=An11g09650 PE=4 SV=1	0	4.923	9.0379	3	4	3	1	343	39.5	9.2	9.34	3
FALSE	High	Master Protein	G7X7I7	Similar to An04g02920 OS=Aspergillus kawachii (strain NBRC 4308) OX=1033177 GN=AKAW_00880 PE=4 SV=1	0	4.906	13.125	2	4	2	1	160	17.7	4.41	12.04	2
FALSE	High	Master Protein	A0A1L9NGD8	Uncharacterized protein OS=Aspergillus tubingensis CBS 134.48 OX=767770 GN=ASPTUDRAFT_195906 PE=4 SV=1	0	4.898	3.24074	2	3	2	1	648	72.5	5.76	7.1	2
FALSE	High	Master Protein	A0A117E121	Eukaryotic translation initiation factor subunit eIF-4F OS=Aspergillus niger OX=5061 GN=ABL_06059 PE=4 SV=1	0	4.877	2.73159	3	3	3	1	1684	180.1	9.51	5.19	3
FALSE	High	Master Protein	A0A1L9N8C3	Uncharacterized protein OS=Aspergillus tubingensis CBS 134.48 OX=767770 GN=ASPTUDRAFT_41864 PE=4 SV=1	0	4.865	8.64198	3	3	3	1	324	36.2	6.2	6.63	3
FALSE	High	Master Protein	A0A100INA5	Vanillin dehydrogenase OS=Aspergillus niger OX=5061 GN=ABL_06999 PE=4 SV=1	0	4.835	2.90456	1	1	1	1	482	51.3	6.1	3.02	1
FALSE	High	Master Protein	A0A1L9NKC5	Uncharacterized protein OS=Aspergillus tubingensis CBS 134.48 OX=767770 GN=ASPTUDRAFT_195204 PE=3 SV=1	0	4.8	4.55635	2	2	2	1	417	45.7	5.95	2.15	2
FALSE	High	Master Protein	A0A124BYX7	Versicolorin B synthase OS=Aspergillus niger OX=5061 GN=ABL_09618 PE=4 SV=1	0	4.798	1.95122	1	2	1	1	615	65.6	4.88	6.53	1
FALSE	High	Master Protein	A0A100I7B5	Probable xaa-pro aminopeptidase An01g13040 OS=Aspergillus niger OX=5061 GN=ABL_01441 PE=3 SV=1	0	4.792	5.70265	2	2	2	1	491	55.1	6.33	4.84	2
FALSE	High	Master Protein	A0A1L9UUH2	Uncharacterized protein OS=Aspergillus brasiliensis CBS 101740 OX=767769 GN=ASPBRDRAFT_53131 PE=4 SV=1	0	4.775	11.7925	2	2	2	1	212	23.8	4.94	4.52	2
FALSE	High	Master Protein	A0A1L9S3L8	Hydrophobin OS=Aspergillus wentii DTO 134E9 OX=1073089 GN=ASPWEDRAFT_35354 PE=3 SV=1	0	4.764	7.45342	1	5	1	1	161	16	4.54	16.71	1
FALSE	High	Master Protein	A0A1L9MY88	Uncharacterized protein OS=Aspergillus tubingensis CBS 134.48 OX=767770 GN=ASPTUDRAFT_45354 PE=4 SV=1	0	4.716	4.24144	2	2	2	1	613	67	7.06	5.17	2
FALSE	High	Master Protein	A0A100IAH9	Calcium homeostasis protein Regucalcin OS=Aspergillus niger OX=5061 GN=ABL_02272 PE=4 SV=1	0	4.697	5.25	2	2	2	1	400	44.4	5.35	4.4	2
FALSE	High	Master Protein	A0A097KZT4	Cytochrome c oxidase subunit 2 OS=Aspergillus ustus OX=40382 GN=cox2 PE=3 SV=1	0	4.693	3.95257	1	3	1	1	253	29.1	4.77	7.34	1
FALSE	High	Master Protein	A0A100I8D7	Fatty acid oxygenase OS=Aspergillus niger OX=5061 GN=ABL_01732 PE=4 SV=1	0	4.687	1.08108	1	1	1	1	1110	125.1	6.7	3.35	1
FALSE	High	Master Protein	A0A100I8W1	Carboxylic ester hydrolase OS=Aspergillus niger OX=5061 GN=ABL_01874 PE=3 SV=1	0	4.684	3.56506	2	2	2	1	561	61.6	4.86	5.58	2
FALSE	High	Master Protein	A0A1L9NLC1	Uncharacterized protein OS=Aspergillus tubingensis CBS 134.48 OX=767770 GN=ASPTUDRAFT_113156 PE=4 SV=1	0	4.678	8.36653	2	2	2	1	251	29.1	7.05	4.75	2
FALSE	High	Master Protein	A0A1M3TB86	Phosphoacetylglucosamine mutase OS=Aspergillus luchuensis CBS 106.47 OX=1137211 GN=ASPFODRAFT_209719 PE=3 SV=1	0	4.669	3.58362	2	2	2	1	586	63.7	5.85	2.43	2
FALSE	High	Master Protein	A0A254U1I4	Alpha/beta hydrolase fold family protein OS=Aspergillus niger OX=5061 GN=CAN33_18550 PE=4 SV=1	0	4.668	8.06452	2	2	2	1	372	41.1	5.6	3.63	2
FALSE	High	Master Protein	A0A146F085	Electron transfer flavoprotein alpha subunit OS=Aspergillus luchuensis OX=1069201 GN=RIB2604_00602270 PE=4 SV=1	0	4.664	6.32184	2	2	2	1	348	36.1	5.78	5.47	2
FALSE	High	Master Protein	A0A100IUA0	C1 tetrahydrofolate synthase OS=Aspergillus niger OX=5061 GN=ABL_10176 PE=3 SV=1	0	4.641	2.55591	2	3	2	1	939	100.6	6.87	6.72	2
FALSE	High	Master Protein	A0A117E3R8	Uncharacterized protein OS=Aspergillus niger OX=5061 GN=ABL_09376 PE=4 SV=1	0	4.639	6.68896	2	4	2	1	299	33.5	6.67	7.24	2
FALSE	High	Master Protein	A0A117E323	Phenylacetyl-CoA ligase OS=Aspergillus niger OX=5061 GN=ABL_08161 PE=4 SV=1	0	4.629	3.95189	2	2	2	1	582	63.8	8.03	4.11	2
FALSE	High	Master Protein	A0A146F7B7	Fumarylacetoacetase OS=Aspergillus luchuensis OX=1069201 GN=RIB2604_01502160 PE=4 SV=1	0	4.615	4.87239	2	2	2	1	431	47.1	6.39	5.43	2
FALSE	High	Master Protein	A0A146EYZ2	RNA annealing protein Yra1 OS=Aspergillus luchuensis OX=1069201 GN=RIB2604_00402020 PE=4 SV=1	0	4.61	10.5442	2	2	2	1	294	30.9	9.99	5.17	2
FALSE	High	Master Protein	A0A117E3N6	Tripeptidyl peptidase Sed3 OS=Aspergillus niger OX=5061 GN=ABL_09241 PE=4 SV=1	0	4.601	3.57143	2	2	2	1	588	64	4.74	5.67	2
FALSE	High	Master Protein	A0A0F8VDU7	Uncharacterized protein OS=Aspergillus ochraceoroseus OX=138278 GN=AOCH_001879 PE=4 SV=1	0	4.593	1.17048	2	2	2	1	1965	220.7	5.41	3.68	2
FALSE	High	Master Protein	G7Y1Y7	Dynamin family protein OS=Aspergillus kawachii (strain NBRC 4308) OX=1033177 GN=AKAW_11308 PE=3 SV=1	0	4.59	2.81481	2	2	2	1	675	75.6	5.97	3.94	2
FALSE	High	Master Protein	A0A146FK44	L-lactate dehydrogenase OS=Aspergillus luchuensis OX=1069201 GN=RIB2604_02001380 PE=3 SV=1	0	4.579	5.96026	2	2	2	1	453	50	7.39	2.29	2
FALSE	High	Master Protein	A0A1M3TUQ7	Uncharacterized protein OS=Aspergillus luchuensis CBS 106.47 OX=1137211 GN=ASPFODRAFT_126205 PE=4 SV=1	0	4.568	1.4742	1	1	1	1	814	88.1	8.06	2.7	1
FALSE	High	Master Protein	A0A1L9N677	Uncharacterized protein OS=Aspergillus tubingensis CBS 134.48 OX=767770 GN=ASPTUDRAFT_40872 PE=3 SV=1	0	4.563	2.45399	2	2	2	1	815	92	6.95	4.28	2
FALSE	High	Master Protein	A0A100IPG1	60S ribosomal protein L10 OS=Aspergillus niger OX=5061 GN=ABL_07617 PE=4 SV=1	0	4.55	9.86547	2	3	1	1	223	25.5	10.24	8.34	2
FALSE	High	Master Protein	A0A142HXW6	Glyceraldehyde-3-phosphate dehydrogenase OS=Mucilaginibacter sp. PAMC 26640 OX=1300914 GN=A0256_20950 PE=3 SV=1	0	4.548	6.0423	2	3	1	1	331	35.5	6.19	8.16	2
FALSE	High	Master Protein	A0A100ICN3	Pyruvate dehydrogenase E1 component subunit alpha OS=Aspergillus niger OX=5061 GN=ABL_02800 PE=4 SV=1	0	4.532	4.49438	3	3	3	1	623	69	8.78	6.3	3
FALSE	High	Master Protein	A0A100I3U9	Thioredoxin reductase OS=Aspergillus niger OX=5061 GN=ABL_00553 PE=3 SV=1	0	4.524	0.659341	1	1	1	1	1820	200	6.95	3.08	1
FALSE	High	Master Protein	A0A146FYY0	Serine/threonine-protein phosphatase OS=Aspergillus luchuensis OX=1069201 GN=RIB2604_03500740 PE=3 SV=1	0	4.522	1.9802	2	2	2	1	909	102.9	5.68	4.7	2
FALSE	High	Master Protein	A0A124BWF4	Alkaline phosphatase OS=Aspergillus niger OX=5061 GN=ABL_02941 PE=3 SV=1	0	4.498	1.7684	3	3	3	1	1753	193.9	6.77	7.27	3
FALSE	High	Master Protein	A0A0K8L782	Conidiation-specific protein 10 OS=Aspergillus udagawae OX=91492 GN=AUD_3125 PE=4 SV=1	0	4.475	16.129	1	2	1	1	93	9.8	8.56	5.53	1
FALSE	High	Master Protein	A0A0L1J6D6	60S ribosomal protein L22 (Fragment) OS=Aspergillus nomius NRRL 13137 OX=1509407 GN=ANOM_003962 PE=4 SV=1	0	4.474	13.8158	2	2	2	1	152	17.1	9.47	4.22	2
FALSE	High	Master Protein	Q0CUW5	Deoxyuridine 5'-triphosphate nucleotidohydrolase OS=Aspergillus terreus (strain NIH 2624 / FGSC A1156) OX=341663 GN=ATEG_02519 PE=4 SV=1	0	4.472	6.45161	1	1	1	1	217	23.1	9.52	2.99	1
FALSE	High	Master Protein	A0A1M3SYP7	Uncharacterized protein (Fragment) OS=Aspergillus luchuensis CBS 106.47 OX=1137211 GN=ASPFODRAFT_54877 PE=4 SV=1	0	4.466	1.89492	2	2	2	1	1161	126.8	7.28	3.84	2
FALSE	High	Master Protein	A0A1M3TZQ4	Uncharacterized protein OS=Aspergillus luchuensis CBS 106.47 OX=1137211 GN=ASPFODRAFT_39393 PE=3 SV=1	0	4.454	11.0497	2	2	2	1	181	20.3	4.87	4.34	2
FALSE	High	Master Protein	G3XP39	Cell wall biogenesis protein OS=Aspergillus niger (strain ATCC 1015 / CBS 113.46 / FGSC A1144 / LSHB Ac4 / NCTC 3858a / NRRL 328 / USDA 3528.7) OX=380704 GN=cwpA PE=4 SV=1	0	4.424	7.29167	2	2	2	1	288	28.3	4.55	6.4	2
FALSE	High	Master Protein	A0A2G7G4T2	D-galactonate dehydratase OS=Aspergillus arachidicola OX=656916 GN=AARAC_011800 PE=4 SV=1	0	4.415	3.71287	1	1	1	1	404	44.6	5.5	3.21	1
FALSE	High	Master Protein	A0A117DYY8	Uncharacterized protein OS=Aspergillus niger OX=5061 GN=ABL_03499 PE=4 SV=1	0	4.405	13.5417	1	1	1	1	96	10.2	5.49	3.06	1
FALSE	High	Master Protein	A0A100I6J0	Phospholipase/carboxylesterase OS=Aspergillus niger OX=5061 GN=ABL_01239 PE=4 SV=1	0	4.402	9.12863	2	2	2	1	241	27.1	5.82	4.45	2
FALSE	High	Master Protein	A0A2T5LW81	Peptidyl-prolyl cis-trans isomerase OS=Aspergillus ochraceoroseus IBT 24754 OX=1392256 GN=P175DRAFT_0457923 PE=4 SV=1	0	4.4	10.6061	1	1	1	1	132	14.3	9.41	2.38	1
FALSE	High	Master Protein	A0A0S7E5E2	Protein sda1 OS=Aspergillus lentulus OX=293939 GN=ALT_7781 PE=3 SV=1	0	4.389	1.84426	2	3	2	1	976	109.9	9.11	7.53	2
FALSE	High	Master Protein	A0A146FG11	Lipase OS=Aspergillus luchuensis OX=1069201 GN=RIB2604_01800760 PE=4 SV=1	0	4.386	4.30464	1	1	1	1	302	32	5.22	3.19	1
FALSE	High	Master Protein	A0A100ISN1	Epoxide hydrolase OS=Aspergillus niger OX=5061 GN=ABL_09249 PE=4 SV=1	0	4.381	4.27136	1	1	1	1	398	44.5	5.68	2.49	1
FALSE	High	Master Protein	Q45U61	Actibind OS=Aspergillus niger OX=5061 GN=ACTIB-I PE=1 SV=1	0	4.34	4.81481	1	2	1	1	270	29.9	4.21	6.4	1
FALSE	High	Master Protein	A0A146FAT1	Chaperone/heat shock protein Hsp12 OS=Aspergillus luchuensis OX=1069201 GN=RIB2604_01601940 PE=4 SV=1	0	4.337	24.7191	2	2	2	1	89	9.5	6.55	5.2	2
FALSE	High	Master Protein	A0A1L9P4C6	Uncharacterized protein OS=Aspergillus versicolor CBS 583.65 OX=1036611 GN=ASPVEDRAFT_23398 PE=4 SV=1	0	4.335	9.17031	2	2	2	1	229	25.4	5.49	5.36	2
FALSE	High	Master Protein	A0A1M3U1Z9	Inositol-1-monophosphatase OS=Aspergillus luchuensis CBS 106.47 OX=1137211 GN=ASPFODRAFT_178446 PE=3 SV=1	0	4.297	8.88158	2	2	2	1	304	33.4	5.3	4.17	2
FALSE	High	Master Protein	A0A146FZL5	Similar to An15g00620 OS=Aspergillus luchuensis OX=1069201 GN=RIB2604_03600590 PE=4 SV=1	0	4.286	9.34579	2	4	2	1	214	22.6	5.25	9.9	2
FALSE	High	Master Protein	A0A100IQT8	Unnamed protein product OS=Aspergillus niger OX=5061 GN=ABL_08002 PE=4 SV=1	0	4.285	4.43548	2	2	2	1	496	55.4	5.49	2.36	2
FALSE	High	Master Protein	A0A146FI06	Branched-chain-amino-acid aminotransferase OS=Aspergillus luchuensis OX=1069201 GN=RIB2604_02000340 PE=3 SV=1	0	4.284	2.67857	1	1	1	1	448	49.3	7.39	2.56	1
FALSE	High	Master Protein	A0A117E189	Exo-1,3-beta-glucanase D OS=Aspergillus niger OX=5061 GN=ABL_05191 PE=4 SV=1	0	4.283	1.26024	2	2	2	1	1587	179.2	5.66	4.82	2
FALSE	High	Master Protein	A0A1R3RWQ3	Acylphosphatase OS=Aspergillus carbonarius (strain ITEM 5010) OX=602072 GN=ASPCADRAFT_204621 PE=3 SV=1	0	4.282	24.5098	2	2	2	1	102	11.3	8.7	5.16	2
FALSE	High	Master Protein	A0A1M3T9T9	2-(3-amino-3-carboxypropyl)histidine synthase subunit 2 OS=Aspergillus luchuensis CBS 106.47 OX=1137211 GN=ASPFODRAFT_63613 PE=3 SV=1	0	4.279	3.63436	2	2	2	1	908	98.1	5.31	2.74	2
FALSE	High	Master Protein	A0A146FMR5	Dienelactone hydrolase OS=Aspergillus luchuensis OX=1069201 GN=RIB2604_02103210 PE=4 SV=1	0	4.273	3.34572	2	3	2	1	269	29.6	6.99	8.91	2
FALSE	High	Master Protein	A0A1M3U1H0	Uncharacterized protein OS=Aspergillus luchuensis CBS 106.47 OX=1137211 GN=ASPFODRAFT_56400 PE=4 SV=1	0	4.265	10.6667	2	2	2	1	225	25.9	7.33	5.31	2
FALSE	High	Master Protein	A0A1M3T7Y4	Uncharacterized protein OS=Aspergillus luchuensis CBS 106.47 OX=1137211 GN=ASPFODRAFT_143079 PE=3 SV=1	0	4.261	2.45614	1	1	1	1	570	62.7	4.77	2.32	1
FALSE	High	Master Protein	A0A146F4B3	Glyoxalase family protein OS=Aspergillus luchuensis OX=1069201 GN=RIB2604_00804290 PE=4 SV=1	0	4.252	9.48905	1	1	1	1	137	15.2	6.51	3.42	1
FALSE	High	Master Protein	A0A100I5S5	RTA1 domain protein OS=Aspergillus niger OX=5061 GN=ABL_01117 PE=4 SV=1	0	4.25	2.86885	1	3	1	1	488	55	8.56	7.21	1
FALSE	High	Master Protein	A0A1L9NAU3	Uncharacterized protein OS=Aspergillus tubingensis CBS 134.48 OX=767770 GN=ASPTUDRAFT_116398 PE=4 SV=1	0	4.25	2.40964	1	1	1	1	498	54.9	8.75	3.17	1
FALSE	High	Master Protein	A0A100IFF6	Phospholipase OS=Aspergillus niger OX=5061 GN=ABL_03524 PE=3 SV=1	0	4.243	1.8283	2	2	2	1	1258	140.2	6.6	4.52	2
FALSE	High	Master Protein	A0A100ISP0	Uncharacterized protein OS=Aspergillus niger OX=5061 GN=ABL_09278 PE=4 SV=1	0	4.24	9.23077	1	1	1	1	195	20	4.51	2.77	1
FALSE	High	Master Protein	A0A254TUL3	Diphosphomevalonate decarboxylase OS=Aspergillus niger OX=5061 GN=ATCC64974_77580 PE=3 SV=1	0	4.207	5.94059	2	2	2	1	404	43.4	6.19	3.69	2
FALSE	High	Master Protein	A0A1L9UMX5	Peptidyl-prolyl cis-trans isomerase OS=Aspergillus brasiliensis CBS 101740 OX=767769 GN=ASPBRDRAFT_42598 PE=3 SV=1	0	4.195	12.6437	2	4	1	1	174	19	8.41	6.94	2
FALSE	High	Master Protein	A0A254UP90	Amidase family protein OS=Aspergillus niger OX=5061 GN=CAN33_26715 PE=4 SV=1	0	4.187	4.15973	2	2	2	1	601	65.8	7.37	3.88	2
FALSE	High	Master Protein	A0A100I2Z4	EF hand domain protein OS=Aspergillus niger OX=5061 GN=ABL_00339 PE=3 SV=1	0	4.181	0.734049	1	1	1	1	1771	190	4.82	2.95	1
FALSE	High	Master Protein	A0A100IN28	Uncharacterized protein OS=Aspergillus niger OX=5061 GN=ABL_06547 PE=4 SV=1	0	4.166	4.41176	1	1	1	1	272	29.2	4.39	2.32	1
FALSE	High	Master Protein	A0A0U5FVB2	Putative Nonspecific lipid-transfer protein OS=Aspergillus calidoustus OX=454130 GN=ASPCAL03710 PE=3 SV=1	0	4.134	5.24017	2	2	2	1	458	49	7.08	4.31	2
FALSE	High	Master Protein	A0A146FM90	Actin-related protein 2/3 complex subunit 5 OS=Aspergillus luchuensis OX=1069201 GN=RIB2604_02104710 PE=3 SV=1	0	4.131	7.32984	1	1	1	1	191	20.4	5.59	2.98	1
FALSE	High	Master Protein	A0A146FVM5	Adenylyl-sulfate kinase OS=Aspergillus luchuensis OX=1069201 GN=RIB2604_02902600 PE=3 SV=1	0	4.118	5.72687	1	1	1	1	227	25.5	7.21	2.93	1
FALSE	High	Master Protein	A0A100IR49	Short-chain dehydrogenase OS=Aspergillus niger OX=5061 GN=ABL_08495 PE=4 SV=1	0	4.092	3.5316	2	2	2	1	538	59.4	5.58	4.45	2
FALSE	High	Master Protein	A0A254U3D6	Carboxypeptidase OS=Aspergillus niger OX=5061 GN=CAN33_12325 PE=3 SV=1	0	4.091	2.31729	1	1	1	1	561	62.2	4.63	3.05	1
FALSE	High	Master Protein	A0A1L9NBQ9	Uncharacterized protein OS=Aspergillus tubingensis CBS 134.48 OX=767770 GN=ASPTUDRAFT_27580 PE=4 SV=1	0	4.086	3.10559	2	2	2	1	805	87.3	4.87	6.3	2
FALSE	High	Master Protein	A0A100I8Y2	Cytochrome P450 OS=Aspergillus niger OX=5061 GN=ABL_01895 PE=3 SV=1	0	4.083	5.13919	2	2	2	1	467	51.9	7.66	3.94	2
FALSE	High	Master Protein	A0A2T5LN96	Eukaryotic translation initiation factor 6 OS=Aspergillus ochraceoroseus IBT 24754 OX=1392256 GN=TIF6 PE=3 SV=1	0	4.079	5.16605	1	1	1	1	271	29.2	5.3	2.08	1
FALSE	High	Master Protein	A0A117DV69	Glutathione S-transferase GstA OS=Aspergillus niger OX=5061 GN=ABL_00697 PE=3 SV=1	0	4.076	5.2	1	1	1	1	250	28.4	7.31	2.92	1
FALSE	High	Master Protein	A0A1L9N3R7	Uncharacterized protein OS=Aspergillus tubingensis CBS 134.48 OX=767770 GN=ASPTUDRAFT_122485 PE=4 SV=1	0	4.071	1.70648	2	2	2	1	1172	128.7	5.97	3.82	2
FALSE	High	Master Protein	A0A117E1S1	CFEM domain protein OS=Aspergillus niger OX=5061 GN=ABL_07158 PE=4 SV=1	0	4.062	9.80392	2	3	2	1	204	19.9	6.89	6.72	2
FALSE	High	Master Protein	A0A124BVC6	Oxalate decarboxylase OxdC OS=Aspergillus niger OX=5061 GN=ABL_01235 PE=4 SV=1	0	4.061	3.28228	1	2	1	1	457	51.9	6.01	0	1
FALSE	High	Master Protein	A0A1L9NIW0	Uncharacterized protein OS=Aspergillus tubingensis CBS 134.48 OX=767770 GN=ASPTUDRAFT_50254 PE=4 SV=1	0	4.055	7.84314	1	1	1	1	153	16.3	7.66	2.97	1
FALSE	High	Master Protein	A2R3Z8	Aspergillus niger contig An14c0180, genomic contig OS=Aspergillus niger (strain CBS 513.88 / FGSC A1513) OX=425011 GN=An14g06050 PE=4 SV=1	0	4.05	8.21918	1	3	1	1	146	16	6.54	6.12	1
FALSE	High	Master Protein	A0A146FRT7	Nucleoside hydrolase OS=Aspergillus luchuensis OX=1069201 GN=RIB2604_02600050 PE=4 SV=1	0	4.041	2.1028	1	1	1	1	428	47.8	5.45	2.98	1
FALSE	High	Master Protein	A0A1L9S3P3	Uncharacterized protein OS=Aspergillus wentii DTO 134E9 OX=1073089 GN=ASPWEDRAFT_102397 PE=3 SV=1	0	4.039	14.4737	2	2	2	1	152	16.8	10.37	4.82	2
FALSE	High	Master Protein	A0A1L9NEQ5	Hydrophobin OS=Aspergillus tubingensis CBS 134.48 OX=767770 GN=ASPTUDRAFT_51365 PE=3 SV=1	0	4.033	23.7705	2	2	2	1	122	12.5	4.61	2.74	2
FALSE	High	Master Protein	A0A0F8V8H7	Vacuolar ATP synthase subunit E OS=Aspergillus rambellii OX=308745 GN=ARAM_005864 PE=3 SV=1	0	4.025	9.09091	2	2	2	1	231	26	5.5	4.19	2
FALSE	High	Master Protein	A0A1L9N6K4	Uncharacterized protein OS=Aspergillus tubingensis CBS 134.48 OX=767770 GN=ASPTUDRAFT_545652 PE=4 SV=1	0	4.018	2.5641	1	1	1	1	507	54.7	6.1	2.08	1
FALSE	High	Master Protein	Q2U6G4	Uncharacterized protein OS=Aspergillus oryzae (strain ATCC 42149 / RIB 40) OX=510516 GN=AO090120000247 PE=4 SV=1	0	3.986	2.43309	1	1	1	1	411	45.8	6.18	3.25	1
FALSE	High	Master Protein	A0A146FP77	Glutamyl-tRNA synthetase OS=Aspergillus luchuensis OX=1069201 GN=RIB2604_02301000 PE=3 SV=1	0	3.979	1.68539	1	1	1	1	712	80.5	6.92	3.33	1
FALSE	High	Master Protein	G7XHC8	Leukotriene A(4) hydrolase OS=Aspergillus kawachii (strain NBRC 4308) OX=1033177 GN=AKAW_04451 PE=3 SV=1	0	3.967	3.43284	2	2	2	1	670	75.9	5.96	2.08	2
FALSE	High	Master Protein	A0A0K8LGT6	Phenol 2-monooxygenase OS=Aspergillus udagawae OX=91492 GN=AUD_6382 PE=4 SV=1	0	3.949	2.69953	2	2	2	1	852	96.1	6.48	5.69	2
FALSE	High	Master Protein	A0A017SCX7	60S ribosomal protein L11 OS=Aspergillus ruber CBS 135680 OX=1388766 GN=EURHEDRAFT_73589 PE=3 SV=1	0	3.94	7.95455	1	1	1	1	176	20.2	9.95	3.85	1
FALSE	High	Master Protein	A0A146FL74	Aminotransferase, classes I and II OS=Aspergillus luchuensis OX=1069201 GN=RIB2604_02004810 PE=4 SV=1	0	3.933	2.82723	2	2	2	1	955	106.2	6.54	2.79	2
FALSE	High	Master Protein	A0A1M3TJI0	Uncharacterized protein OS=Aspergillus luchuensis CBS 106.47 OX=1137211 GN=ASPFODRAFT_71291 PE=4 SV=1	0	3.924	2.68456	1	1	1	1	447	50.5	6.58	2.34	1
FALSE	High	Master Protein	A0A100ISK7	Threonine synthase OS=Aspergillus niger OX=5061 GN=ABL_09210 PE=4 SV=1	0	3.916	4.68165	2	2	2	1	534	59	5.68	2.34	2
FALSE	High	Master Protein	A0A100IC23	Sarcosine oxidase OS=Aspergillus niger OX=5061 GN=ABL_02695 PE=4 SV=1	0	3.916	5.06608	2	2	2	1	454	49.3	6.7	4.13	2
FALSE	High	Master Protein	A0A146FBL9	Importin beta-1 subunit OS=Aspergillus luchuensis OX=1069201 GN=RIB2604_01702080 PE=4 SV=1	0	3.911	1.6055	1	2	1	1	872	96.4	4.78	4.38	1
FALSE	High	Master Protein	A0A017SNI2	Serine hydroxymethyltransferase OS=Aspergillus ruber CBS 135680 OX=1388766 GN=EURHEDRAFT_449881 PE=3 SV=1	0	3.898	4.4586	2	2	1	1	471	51.8	7.56	4.4	2
FALSE	High	Master Protein	A0A1L9Q041	Uncharacterized protein OS=Aspergillus versicolor CBS 583.65 OX=1036611 GN=ASPVEDRAFT_201722 PE=4 SV=1	0	3.878	3.5868	2	2	1	1	697	76.6	6.68	4.67	2
FALSE	High	Master Protein	A0A100IGJ9	Acetylornithine aminotransferase OS=Aspergillus niger OX=5061 GN=ABL_03843 PE=3 SV=1	0	3.875	5.06329	2	2	2	1	474	50.9	7.93	2.33	2
FALSE	High	Master Protein	A0A254U1Z2	Lyase family protein OS=Aspergillus niger OX=5061 GN=CAN33_19390 PE=4 SV=1	0	3.87	1.22222	1	1	1	1	900	99.4	5.73	2.73	1
FALSE	High	Master Protein	A0A100IB39	Kynurenine aminotransferase OS=Aspergillus niger OX=5061 GN=ABL_02409 PE=4 SV=1	0	3.864	4.90405	2	2	2	1	469	52.3	6.8	5.82	2
FALSE	High	Master Protein	A0A146FFE9	Aldo-keto reductase OS=Aspergillus luchuensis OX=1069201 GN=RIB2604_01804360 PE=4 SV=1	0	3.859	3.68098	1	2	1	1	326	36.5	6.67	3.9	1
FALSE	High	Master Protein	A0A1M3TUP1	Uncharacterized protein OS=Aspergillus luchuensis CBS 106.47 OX=1137211 GN=ASPFODRAFT_56886 PE=4 SV=1	0	3.855	2.39852	1	1	1	1	542	60.3	5.72	2.84	1
FALSE	High	Master Protein	G7XFT8	Sorting nexin GRD19 OS=Aspergillus kawachii (strain NBRC 4308) OX=1033177 GN=AKAW_03910 PE=4 SV=1	0	3.854	14.7887	2	2	2	1	142	16.7	8.19	3.97	2
FALSE	High	Master Protein	G7XRN5	Uncharacterized protein OS=Aspergillus kawachii (strain NBRC 4308) OX=1033177 GN=AKAW_07790 PE=4 SV=1	0	3.849	4.88722	1	1	1	1	266	26.4	8.88	2.88	1
FALSE	High	Master Protein	A0A100IFR4	Similar to An15g06100 OS=Aspergillus niger OX=5061 GN=ABL_03595 PE=4 SV=1	0	3.843	9.58904	2	2	2	1	146	16	6.19	3.88	2
FALSE	High	Master Protein	A0A1L9NDQ9	Uncharacterized protein OS=Aspergillus tubingensis CBS 134.48 OX=767770 GN=ASPTUDRAFT_40627 PE=4 SV=1	0	3.839	1.05364	2	2	2	1	2088	231.4	5.87	4.32	2
FALSE	High	Master Protein	A0A017SBG7	T-complex protein 1 subunit gamma OS=Aspergillus ruber CBS 135680 OX=1388766 GN=EURHEDRAFT_458116 PE=3 SV=1	0	3.828	4.26716	2	2	2	1	539	59.1	6.07	4.56	2
FALSE	High	Master Protein	A0A146F4R8	Amine oxidase OS=Aspergillus luchuensis OX=1069201 GN=RIB2604_00801520 PE=3 SV=1	0	3.822	3.7092	2	2	2	1	674	75.7	6.32	2.14	2
FALSE	High	Master Protein	A0A100IUG1	Ser/Thr protein phosphatase family OS=Aspergillus niger OX=5061 GN=ABL_09982 PE=4 SV=1	0	3.816	2.1978	1	1	1	1	637	72	5.5	2.57	1
FALSE	High	Master Protein	A0A254U227	Uncharacterized protein OS=Aspergillus niger OX=5061 GN=CAN33_19575 PE=4 SV=1	0	3.811	6.38298	1	1	1	1	188	19.9	6.15	2.97	1
FALSE	High	Master Protein	G3YA88	Uncharacterized protein OS=Aspergillus niger (strain ATCC 1015 / CBS 113.46 / FGSC A1144 / LSHB Ac4 / NCTC 3858a / NRRL 328 / USDA 3528.7) OX=380704 GN=ASPNIDRAFT_55175 PE=4 SV=1	0	3.806	7.64331	1	1	1	1	157	17.1	6.54	2.45	1
FALSE	High	Master Protein	A0A146EXZ7	Similar to An12g10730 OS=Aspergillus luchuensis OX=1069201 GN=RIB2604_00100040 PE=4 SV=1	0	3.805	6.79348	2	2	2	1	368	40.8	5.06	4.74	2
FALSE	High	Master Protein	A0A124BYG9	Pectate lyase OS=Aspergillus niger OX=5061 GN=ABL_08192 PE=3 SV=1	0	3.803	5.88235	2	2	2	1	323	34.4	4.78	5.09	2
FALSE	High	Master Protein	A0A0S7E5P3	Uncharacterized protein OS=Aspergillus lentulus OX=293939 GN=ALT_8895 PE=4 SV=1	0	3.783	1.48017	2	2	2	1	1689	186.6	6.89	4.11	2
FALSE	High	Master Protein	A0A1L9V0Y8	Uncharacterized protein OS=Aspergillus brasiliensis CBS 101740 OX=767769 GN=ASPBRDRAFT_25232 PE=4 SV=1	0	3.782	3.00668	2	2	2	1	898	100.5	5.88	2.01	2
FALSE	High	Master Protein	A0A0L1IRG3	Cytochrome b5-like heme binding domain-containing protein OS=Aspergillus nomius NRRL 13137 OX=1509407 GN=ANOM_011074 PE=3 SV=1	0	3.778	11.9048	1	1	1	1	84	9.4	9.47	2.52	1
FALSE	High	Master Protein	A0A1E3B761	Heat shock protein Hsp88 OS=Aspergillus cristatus OX=573508 GN=SI65_07742 PE=3 SV=1	0	3.775	2.92072	2	2	2	1	719	80.4	5.07	3.92	2
FALSE	High	Master Protein	A0A117DYI9	GPI anchored cell wall protein OS=Aspergillus niger OX=5061 GN=ABL_02298 PE=4 SV=1	0	3.765	1.99275	1	1	1	1	552	55.5	3.99	3.01	1
FALSE	High	Master Protein	G7XHD4	Beta-1,6-glucan boisynthesis protein OS=Aspergillus kawachii (strain NBRC 4308) OX=1033177 GN=AKAW_04457 PE=4 SV=1	0	3.764	5.59441	1	1	1	1	286	30.9	6.21	2.91	1
FALSE	High	Master Protein	A0A1L9RR31	Uncharacterized protein OS=Aspergillus wentii DTO 134E9 OX=1073089 GN=ASPWEDRAFT_26781 PE=3 SV=1	0	3.761	3.03797	1	1	1	1	395	41.4	4.92	3.4	1
FALSE	High	Master Protein	A0A146F9B3	NADH-ubiquinone oxidoreductase 39 kDa subunit OS=Aspergillus luchuensis OX=1069201 GN=RIB2604_01602300 PE=4 SV=1	0	3.759	6.02094	2	2	2	1	382	43.8	7.43	4.18	2
FALSE	High	Master Protein	H9CNQ8	NADH-ubiquinone oxidoreductase chain 5 OS=Neosartorya fischeri (strain ATCC 1020 / DSM 3700 / CBS 544.65 / FGSC A1164 / JCM 1740 / NRRL 181 / WB 181) OX=331117 GN=NFIA_m0510 PE=3 SV=1	0	3.743	1.95783	1	1	1	1	664	73.8	7.36	3	1
FALSE	High	Master Protein	A0A0K8L0G8	Uncharacterized protein OS=Aspergillus udagawae OX=91492 GN=AUD_0816 PE=4 SV=1	0	3.723	5.50964	2	3	2	1	363	39.1	5.31	8.15	2
FALSE	High	Master Protein	A0A1L9MRD0	Uncharacterized protein OS=Aspergillus tubingensis CBS 134.48 OX=767770 GN=ASPTUDRAFT_887680 PE=3 SV=1	0	3.712	3.62173	2	2	2	1	497	54.5	5.85	4.66	2
FALSE	High	Master Protein	Q0CG61	IMP-specific 5'-nucleotidase 1 OS=Aspergillus terreus (strain NIH 2624 / FGSC A1156) OX=341663 GN=ATEG_07331 PE=3 SV=1	0	3.702	3.22581	1	1	1	1	434	48.4	6.96	2.34	1
FALSE	High	Master Protein	A0A1S9DMP1	Cytochrome b5 OS=Aspergillus oryzae OX=5062 GN=OAory_01061510 PE=3 SV=1	0	3.702	5.17241	1	1	1	1	290	31.8	8.65	2.32	1
FALSE	High	Master Protein	A0A146F2M0	GPR/FUN34 family protein OS=Aspergillus luchuensis OX=1069201 GN=RIB2604_00607490 PE=4 SV=1	0	3.695	3.97351	1	2	1	1	302	32.5	6.19	5.98	1
FALSE	High	Master Protein	A0A100IQ42	Filament-forming protein OS=Aspergillus niger OX=5061 GN=ABL_07940 PE=4 SV=1	0	3.69	0.627521	1	1	1	1	2231	247.2	5.49	2.03	1
FALSE	High	Master Protein	A0A1R3RZ66	Uncharacterized protein OS=Aspergillus carbonarius (strain ITEM 5010) OX=602072 GN=ASPCADRAFT_203607 PE=3 SV=1	0	3.685	3.33333	2	2	2	1	570	62.5	5.55	4.41	2
FALSE	High	Master Protein	A0A100IK56	Fructose-bisphosphate aldolase OS=Aspergillus niger OX=5061 GN=ABL_05413 PE=4 SV=1	0	3.671	8.68056	2	2	2	1	288	31.4	5.5	2.43	2
FALSE	High	Master Protein	A0A100IBY6	PT repeat family protein OS=Aspergillus niger OX=5061 GN=ABL_02639 PE=4 SV=1	0	3.644	0.760456	1	1	1	1	1578	166.6	3.98	2.94	1
FALSE	High	Master Protein	A0A117DWQ4	Hypothetical HET-C protein OS=Aspergillus niger OX=5061 GN=ABL_01871 PE=4 SV=1	0	3.641	7.53769	1	1	1	1	199	22.1	7.56	2.31	1
FALSE	High	Master Protein	A0A100IME3	Scramblase family protein OS=Aspergillus niger OX=5061 GN=ABL_06525 PE=4 SV=1	0	3.627	2.06677	1	1	1	1	629	67.8	5.19	3.05	1
FALSE	High	Master Protein	G3XN19	Phosphomevalonate kinase OS=Aspergillus niger (strain ATCC 1015 / CBS 113.46 / FGSC A1144 / LSHB Ac4 / NCTC 3858a / NRRL 328 / USDA 3528.7) OX=380704 GN=ASPNIDRAFT_211137 PE=3 SV=1	0	3.626	4.90405	2	2	2	1	469	51.1	5.11	4.49	2
FALSE	High	Master Protein	A0A146EX77	Phosphoribosyl transferase OS=Aspergillus luchuensis OX=1069201 GN=RIB2604_00101210 PE=4 SV=1	0	3.626	12.6829	2	2	2	1	205	22.4	5.58	2.18	2
FALSE	High	Master Protein	A0A100IUA9	Beta-glucuronidase OS=Aspergillus niger OX=5061 GN=ABL_10137 PE=4 SV=1	0	3.624	2.95749	1	1	1	1	541	58.9	5.38	0	1
FALSE	High	Master Protein	A0A124BYG4	DUF803 domain membrane protein OS=Aspergillus niger OX=5061 GN=ABL_08147 PE=4 SV=1	0	3.621	0.571973	1	1	1	1	2098	229.1	6.74	2.76	1
FALSE	High	Master Protein	A0A2V5HGI8	Dipeptidase OS=Aspergillus violaceofuscus CBS 115571 OX=1450538 GN=BO99DRAFT_481190 PE=4 SV=1	0	3.617	3.0837	1	1	1	1	454	49.6	5.78	2.67	1
FALSE	High	Master Protein	A0A1S9DHG8	Uncharacterized protein OS=Aspergillus oryzae OX=5062 GN=OAory_01098190 PE=4 SV=1	0	3.6	1.88133	1	1	1	1	691	77.2	4.58	3.37	1
FALSE	High	Master Protein	A0A0L1J7S7	Conidiation-specific protein 10 OS=Aspergillus nomius NRRL 13137 OX=1509407 GN=ANOM_004413 PE=4 SV=1	0	3.59	17.8571	1	1	1	1	84	8.9	8.59	3.17	1
FALSE	High	Master Protein	A0A100IBV7	Lectin family integral membrane protein OS=Aspergillus niger OX=5061 GN=ABL_02621 PE=4 SV=1	0	3.586	3.13253	1	1	1	1	415	45.4	8.22	2.58	1
FALSE	High	Master Protein	A0A1L9WPD2	Uncharacterized protein OS=Aspergillus aculeatus ATCC 16872 OX=690307 GN=ASPACDRAFT_1858030 PE=4 SV=1	0	3.585	5.80357	1	2	1	1	224	26.1	10.32	4.76	1
FALSE	High	Master Protein	A0A1L9NP74	Mitogen-activated protein kinase OS=Aspergillus tubingensis CBS 134.48 OX=767770 GN=ASPTUDRAFT_52753 PE=3 SV=1	0	3.584	5.23691	2	2	2	1	401	46.2	6.32	5.56	2
FALSE	High	Master Protein	A0A100IKM4	Aldehyde dehydrogenase family protein OS=Aspergillus niger OX=5061 GN=ABL_05636 PE=3 SV=1	0	3.577	2.79255	2	2	2	1	752	83	6.54	4.69	2
FALSE	High	Master Protein	A0A229YVY6	NADH dehydrogenase [ubiquinone] 1 alpha subcomplex subunit OS=Aspergillus turcosus OX=1245748 GN=CDV55_03934 PE=3 SV=1	0	3.566	5.52764	1	1	1	1	199	22.5	6.8	2.57	1
FALSE	High	Master Protein	A0A0F8X9F9	Vesicle transport v-snare protein OS=Aspergillus rambellii OX=308745 GN=ARAM_000950 PE=4 SV=1	0	3.558	4.70588	1	1	1	1	255	29.2	5.78	2.9	1
FALSE	High	Master Protein	A0A1L9N697	Uncharacterized protein OS=Aspergillus tubingensis CBS 134.48 OX=767770 GN=ASPTUDRAFT_64793 PE=4 SV=1	0	3.549	9.32203	1	1	1	1	118	13	5.02	2.38	1
FALSE	High	Master Protein	A0A117E306	U5 snRNP complex subunit OS=Aspergillus niger OX=5061 GN=ABL_09046 PE=4 SV=1	0	3.542	2.31548	1	1	1	1	691	75.7	8.56	2.51	1
FALSE	High	Master Protein	G7XW03	Translation initiation inhibitor OS=Aspergillus kawachii (strain NBRC 4308) OX=1033177 GN=AKAW_09226 PE=4 SV=1	0	3.521	7.10059	1	2	1	1	169	18.3	8.72	5.82	1
FALSE	High	Master Protein	A0A1L9UG67	Uncharacterized protein OS=Aspergillus brasiliensis CBS 101740 OX=767769 GN=ASPBRDRAFT_155750 PE=4 SV=1	0	3.501	1.5894	1	1	1	1	755	85.3	6.74	2.04	1
FALSE	High	Master Protein	A0A1L9UYX3	Uncharacterized protein OS=Aspergillus brasiliensis CBS 101740 OX=767769 GN=ASPBRDRAFT_115032 PE=4 SV=1	0	3.495	1.67866	1	1	1	1	834	89.3	7.61	2.47	1
FALSE	High	Master Protein	A0A146FIK4	3-phytase B OS=Aspergillus luchuensis OX=1069201 GN=RIB2604_02002630 PE=3 SV=1	0	3.485	3.09917	1	1	1	1	484	53.2	4.6	2.31	1
FALSE	High	Master Protein	A0A2K5A6Q8	Uncharacterized protein OS=Aspergillus niger OX=5061 GN=ATCC64974_53450 PE=4 SV=1	0	3.47	1.82815	2	2	2	1	1094	100.5	4.11	5.24	2
FALSE	High	Master Protein	A0A1M3TTP2	Glucooligosaccharide oxidase OS=Aspergillus luchuensis CBS 106.47 OX=1137211 GN=ASPFODRAFT_204902 PE=3 SV=1	0	3.463	2.85132	1	1	1	1	491	52.8	5.08	2.1	1
FALSE	High	Master Protein	A0A146FTG3	Bifunctional pyrimidine biosynthesis protein OS=Aspergillus luchuensis OX=1069201 GN=RIB2604_02603110 PE=3 SV=1	0	3.459	0.922266	2	2	2	1	2277	250.1	6.43	4.24	2
FALSE	High	Master Protein	A0A117E2D6	NADPH-dependent diflavin oxidoreductase 1 OS=Aspergillus niger OX=5061 GN=TAH18 PE=3 SV=1	0	3.453	1.98123	2	2	2	1	959	106	6.81	4.14	2
FALSE	High	Master Protein	A0A117DZ46	Delta(24(24(1)))-sterol reductase OS=Aspergillus niger OX=5061 GN=ABL_02788 PE=4 SV=1	0	3.451	1.69014	2	3	2	1	1065	120.1	6.87	3.59	2
FALSE	High	Master Protein	A0A1M3T7X1	Uncharacterized protein OS=Aspergillus luchuensis CBS 106.47 OX=1137211 GN=ASPFODRAFT_64007 PE=4 SV=1	0	3.446	4.56274	1	1	1	1	263	29.1	6.07	2.86	1
FALSE	High	Master Protein	A0A100IAP9	Ornithine aminotransferase OS=Aspergillus niger OX=5061 GN=ABL_02320 PE=3 SV=1	0	3.439	4.19287	2	2	2	1	477	52	6.32	4.63	2
FALSE	High	Master Protein	A0A0K8LBQ6	AP-2 complex subunit beta OS=Aspergillus udagawae OX=91492 GN=AUD_4363 PE=4 SV=1	0	3.433	1.17739	1	1	1	1	1274	139.8	5.63	2.17	1
FALSE	High	Master Protein	A0A1L9N0V7	Uncharacterized protein OS=Aspergillus tubingensis CBS 134.48 OX=767770 GN=ASPTUDRAFT_125182 PE=4 SV=1	0	3.428	2.29885	1	1	1	1	522	57.1	7.97	2.33	1
FALSE	High	Master Protein	G7Y260	Similar to An08g11410 OS=Aspergillus kawachii (strain NBRC 4308) OX=1033177 GN=AKAW_11381 PE=4 SV=1	0	3.427	10.8871	2	2	2	1	248	28.1	6.34	3.96	2
FALSE	High	Master Protein	A0A146FZ70	Polysaccharide deacetylase family protein OS=Aspergillus luchuensis OX=1069201 GN=RIB2604_03600970 PE=4 SV=1	0	3.401	4.56026	1	1	1	1	307	35.5	5.83	2.61	1
FALSE	High	Master Protein	A0A117E1R1	Lanthionine synthetase C family protein OS=Aspergillus niger OX=5061 GN=ABL_07113 PE=4 SV=1	0	3.391	3.2197	1	1	1	1	528	58	6.18	2.5	1
FALSE	High	Master Protein	A0A100IKI2	5-methyltetrahydropteroyltriglutamate-homocysteine methyltransferase OS=Aspergillus niger OX=5061 GN=ABL_05558 PE=4 SV=1	0	3.384	3.50877	1	1	1	1	399	45.1	5.72	3.18	1
FALSE	High	Master Protein	A0A0K8LNK7	Actin-related protein 2/3 complex subunit 2 OS=Aspergillus udagawae OX=91492 GN=AUD_8880 PE=4 SV=1	0	3.378	0.884173	1	2	1	1	1131	127.9	7.11	4.7	1
FALSE	High	Master Protein	A0A229XAV0	Uncharacterized protein OS=Aspergillus turcosus OX=1245748 GN=CFD26_04037 PE=4 SV=1	0	3.374	5.82011	1	1	1	1	189	20.8	9.77	3.33	1
FALSE	High	Master Protein	A0A1M3TQS0	Carbohydrate esterase family 8 protein OS=Aspergillus luchuensis CBS 106.47 OX=1137211 GN=ASPFODRAFT_215818 PE=4 SV=1	0	3.35	3.25815	1	1	1	1	399	43.3	5.24	3.1	1
FALSE	High	Master Protein	A0A1L9U8A4	Uncharacterized protein OS=Aspergillus brasiliensis CBS 101740 OX=767769 GN=ASPBRDRAFT_134464 PE=4 SV=1	0	3.347	3.67647	1	1	1	1	408	43.6	5.03	3.36	1
FALSE	High	Master Protein	A0A117E2P4	Thioredoxin OS=Aspergillus niger OX=5061 GN=ABL_08624 PE=4 SV=1	0	3.341	13.3803	2	2	2	1	142	15.8	8.84	5.44	2
FALSE	High	Master Protein	A0A1F8A4Y1	Argininosuccinate lyase OS=Aspergillus bombycis OX=109264 GN=ABOM_004819 PE=3 SV=1	0	3.338	2.95276	1	1	1	1	508	57.1	6.29	2.3	1
FALSE	High	Master Protein	A0A100IGK2	NmrA-like family protein OS=Aspergillus niger OX=5061 GN=ABL_03838 PE=4 SV=1	0	3.328	6.92771	2	2	2	1	332	36.8	5.83	4.01	2
FALSE	High	Master Protein	A0A0U5G9Z3	Putative Histone H1 OS=Aspergillus calidoustus OX=454130 GN=ASPCAL10911 PE=3 SV=1	0	3.316	6.51163	1	1	1	1	215	22.6	10.81	3.15	1
FALSE	High	Master Protein	A0A1F7ZUJ8	Peptidyl-prolyl cis-trans isomerase OS=Aspergillus bombycis OX=109264 GN=ABOM_008215 PE=3 SV=1	0	3.307	14.9425	2	4	1	1	174	19	8.41	10.13	2
FALSE	High	Master Protein	A0A1L9MVW2	Uncharacterized protein OS=Aspergillus tubingensis CBS 134.48 OX=767770 GN=ASPTUDRAFT_32592 PE=3 SV=1	0	3.304	2.13816	1	1	1	1	608	67.2	5.31	2.7	1
FALSE	High	Master Protein	Q0CMK7	Uncharacterized protein OS=Aspergillus terreus (strain NIH 2624 / FGSC A1156) OX=341663 GN=ATEG_05077 PE=4 SV=1	0	3.298	6.19946	2	2	2	1	371	41.3	6.76	4.37	2
FALSE	High	Master Protein	A0A124BWE4	Oxidoreductase, short-chain dehydrogenase/reductase family OS=Aspergillus niger OX=5061 GN=ABL_02892 PE=4 SV=1	0	3.282	7.74411	2	2	2	1	297	31.9	6.25	2.54	2
FALSE	High	Master Protein	A0A1L9RGY1	Uncharacterized protein OS=Aspergillus wentii DTO 134E9 OX=1073089 GN=ASPWEDRAFT_42105 PE=4 SV=1	0	3.28	4.08163	2	2	2	1	490	56.8	6.65	4.63	2
FALSE	High	Master Protein	A0A0K8L5H8	Mitogen-activated protein kinase OS=Aspergillus udagawae OX=91492 GN=AUD_2208 PE=3 SV=1	0	3.272	2.59434	1	1	1	1	424	48.4	5.88	2.42	1
FALSE	High	Master Protein	A0A1F8AFT2	Septin AspB OS=Aspergillus bombycis OX=109264 GN=ABOM_000662 PE=3 SV=1	0	3.26	3.56473	2	2	2	1	533	60.2	7.47	5.17	2
FALSE	High	Master Protein	A0A1L9UP64	Uncharacterized protein OS=Aspergillus brasiliensis CBS 101740 OX=767769 GN=ASPBRDRAFT_41226 PE=4 SV=1	0	3.254	9.09091	1	1	1	1	187	19.9	4.7	0	1
FALSE	High	Master Protein	Q0CTF7	Serine palmitoyltransferase 2 OS=Aspergillus terreus (strain NIH 2624 / FGSC A1156) OX=341663 GN=ATEG_03027 PE=3 SV=1	0	3.252	2.12766	2	2	2	1	893	99.1	9.64	5.19	2
FALSE	High	Master Protein	A0A1M3T827	Uncharacterized protein OS=Aspergillus luchuensis CBS 106.47 OX=1137211 GN=ASPFODRAFT_170189 PE=4 SV=1	0	3.251	12.9771	1	1	1	1	131	14.2	5.94	2.34	1
FALSE	High	Master Protein	A0A146FIJ8	Mitochondrial acetolactate synthase small subunit OS=Aspergillus luchuensis OX=1069201 GN=RIB2604_02001550 PE=4 SV=1	0	3.236	2.99252	1	1	1	1	401	43.9	8.56	2.59	1
FALSE	High	Master Protein	A0A100ISE0	BolA domain protein OS=Aspergillus niger OX=5061 GN=ABL_09113 PE=3 SV=1	0	3.23	9.84848	1	1	1	1	132	14.9	10.18	0	1
FALSE	High	Master Protein	G7X6S8	Clathrin heavy chain OS=Aspergillus kawachii (strain NBRC 4308) OX=1033177 GN=AKAW_00803 PE=3 SV=1	0	3.225	1.25074	2	2	2	1	1679	190.7	5.31	3.48	2
FALSE	High	Master Protein	A0A2I1C9I2	Ubiquitin-like protein OS=Aspergillus novofumigatus IBT 16806 OX=1392255 GN=P174DRAFT_420837 PE=4 SV=1	0	3.222	8.8	1	1	1	1	125	14.6	8.75	2.35	1
FALSE	High	Master Protein	A0A100IQ14	Alpha,alpha-trehalose-phosphate synthase OS=Aspergillus niger OX=5061 GN=ABL_07929 PE=4 SV=1	0	3.221	2.22222	2	2	2	1	855	96.6	8.31	5.01	2
FALSE	High	Master Protein	A0A1M3TVS1	Carbohydrate-binding module family 20 protein OS=Aspergillus luchuensis CBS 106.47 OX=1137211 GN=ASPFODRAFT_57045 PE=4 SV=1	0	3.219	2.3511	1	1	1	1	638	69.2	4.31	1.76	1
FALSE	High	Master Protein	A0A146FNM8	Ser/Thr protein phosphatase family protein OS=Aspergillus luchuensis OX=1069201 GN=RIB2604_02111430 PE=4 SV=1	0	3.217	4.16667	1	1	1	1	336	37.2	6.32	1.98	1
FALSE	High	Master Protein	A0A0F4YZQ7	Nucleolar protein 58 OS=Rasamsonia emersonii CBS 393.64 OX=1408163 GN=T310_2382 PE=4 SV=1	0	3.212	2.13115	1	1	1	1	610	67.2	7.05	2.92	1
FALSE	High	Master Protein	A0A100ITT4	Patatin-like serine hydrolase OS=Aspergillus niger OX=5061 GN=ABL_09867 PE=4 SV=1	0	3.209	3.57143	2	2	2	1	840	91.2	7.97	2.48	2
FALSE	High	Master Protein	A0A100ILY6	Similar to An16g04350 OS=Aspergillus niger OX=5061 GN=ABL_05917 PE=4 SV=1	0	3.199	1.67832	1	1	1	1	715	77.2	5.16	2.85	1
FALSE	High	Master Protein	A0A1L9UR76	Uncharacterized protein OS=Aspergillus brasiliensis CBS 101740 OX=767769 GN=ASPBRDRAFT_27283 PE=4 SV=1	0	3.198	7.11111	1	1	1	1	225	24.3	9.58	2.67	1
FALSE	High	Master Protein	A0A0F4Z006	Transcription factor (Sin3) OS=Rasamsonia emersonii CBS 393.64 OX=1408163 GN=T310_2124 PE=4 SV=1	0	3.17	0.508318	1	1	1	1	2164	244.5	7.01	2.03	1
FALSE	High	Master Protein	A0A100ISB5	Membrane bound C2 domain protein vp115 OS=Aspergillus niger OX=5061 GN=ABL_09083 PE=4 SV=1	0	3.163	1.38158	2	2	2	1	1520	167.3	6.11	4.25	2
FALSE	High	Master Protein	A0A254TQ95	Ribosomal protein L21e family protein OS=Aspergillus niger OX=5061 GN=CAN33_50540 PE=4 SV=1	0	3.142	9.13706	2	2	2	1	197	22.5	10.42	4.86	2
FALSE	High	Master Protein	A0A100ISJ8	Coatomer subunit alpha OS=Aspergillus niger OX=5061 GN=ABL_09216 PE=4 SV=1	0	3.138	1.23762	1	1	1	1	1212	136	6.28	2.38	1
FALSE	High	Master Protein	A0A0F8U140	40S ribosomal protein S24 (Fragment) OS=Aspergillus ochraceoroseus OX=138278 GN=AOCH_002671 PE=3 SV=1	0	3.133	6.31579	2	3	2	1	190	21.6	11.17	7.18	2
FALSE	High	Master Protein	G3Y435	Uncharacterized protein OS=Aspergillus niger (strain ATCC 1015 / CBS 113.46 / FGSC A1144 / LSHB Ac4 / NCTC 3858a / NRRL 328 / USDA 3528.7) OX=380704 GN=ASPNIDRAFT_213851 PE=4 SV=1	0	3.114	1.65394	1	1	1	1	786	84.7	6.39	0	1
FALSE	High	Master Protein	A0A100IPF4	DsDNA-binding protein PDCD5 OS=Aspergillus niger OX=5061 GN=ABL_07356 PE=4 SV=1	0	3.111	6.66667	1	1	1	1	165	18.6	5.66	2.83	1
FALSE	High	Master Protein	A0A100INM2	Uncharacterized protein OS=Aspergillus niger OX=5061 GN=ABL_06936 PE=4 SV=1	0	3.106	1.34715	1	1	1	1	965	108.4	5.74	0	1
FALSE	High	Master Protein	A0A117E1V8	NADH-ubiquinone oxidoreductase 21 kDa subunit OS=Aspergillus niger OX=5061 GN=ABL_07304 PE=4 SV=1	0	3.068	2.78746	1	3	1	1	287	31.9	9.69	5.22	1
FALSE	High	Master Protein	A0A231MSY4	Uncharacterized protein OS=Aspergillus thermomutatus OX=41047 GN=CDV56_00145 PE=4 SV=1	0	3.065	0.677757	1	1	1	1	1623	179.9	7.5	2.56	1
FALSE	High	Master Protein	G3Y4N1	1-(5-phosphoribosyl)-5-[(5-phosphoribosylamino)methylideneamino] imidazole-4-carboxamide isomerase OS=Aspergillus niger (strain ATCC 1015 / CBS 113.46 / FGSC A1144 / LSHB Ac4 / NCTC 3858a / NRRL 328 / USDA 3528.7) OX=380704 GN=ASPNIDRAFT_51056 PE=3 SV=1	0	3.057	4.65116	1	1	1	1	258	28.3	5.66	2.63	1
FALSE	High	Master Protein	A0A0F8UEM5	Putative catechol dioxygenase OS=Aspergillus rambellii OX=308745 GN=ARAM_000759 PE=4 SV=1	0	3.05	4.48549	1	1	1	1	379	42.7	6.65	2.73	1
FALSE	High	Master Protein	A0A1L9UZC8	Uncharacterized protein OS=Aspergillus brasiliensis CBS 101740 OX=767769 GN=ASPBRDRAFT_36221 PE=4 SV=1	0	3.042	3.26087	1	1	1	1	368	41.8	6.24	3.05	1
FALSE	High	Master Protein	A0A100I3L3	Phosphoribosylaminoimidazole carboxylase OS=Aspergillus niger OX=5061 GN=ABL_00517 PE=3 SV=1	0	3.037	3.84615	2	2	2	1	572	62.4	6.92	4.36	2
FALSE	High	Master Protein	A0A1R3RR85	Eukaryotic translation initiation factor 3 subunit J OS=Aspergillus carbonarius (strain ITEM 5010) OX=602072 GN=HCR1 PE=3 SV=1	0	3.026	4.49438	1	1	1	1	267	29.8	5	1.98	1
FALSE	High	Master Protein	A0A100I8Y3	Phosphoribosylformylglycinamidine synthase OS=Aspergillus niger OX=5061 GN=ABL_01889 PE=3 SV=1	0	3.017	0.95518	1	1	1	1	1361	147	6.15	2.23	1
FALSE	High	Master Protein	Q5B4Q4	Mitochondrial pyruvate carrier OS=Emericella nidulans (strain FGSC A4 / ATCC 38163 / CBS 112.46 / NRRL 194 / M139) OX=227321 GN=AN4476.2 PE=3 SV=1	0	3.017	2.78481	1	1	1	1	395	41.3	9.74	1.95	1
FALSE	High	Master Protein	A0A100IU49	Catalase OS=Aspergillus niger OX=5061 GN=ABL_10033 PE=4 SV=1	0	3.016	2.38854	1	1	1	1	628	69.8	7.72	2.19	1
FALSE	High	Master Protein	A0A2G7G4Q0	cAMP-dependent protein kinase regulatory subunit OS=Aspergillus arachidicola OX=656916 GN=AARAC_011355 PE=3 SV=1	0	3.011	2.40385	1	2	1	1	416	45.2	5.16	4.09	1
FALSE	High	Master Protein	A0A117E0X7	60S ribosomal protein L28 OS=Aspergillus niger OX=5061 GN=ABL_04037 PE=4 SV=1	0	3.01	9.15033	1	1	1	1	153	16.6	10.36	2.82	1
FALSE	High	Master Protein	A0A1M3TJ51	Uncharacterized protein OS=Aspergillus luchuensis CBS 106.47 OX=1137211 GN=ASPFODRAFT_46366 PE=4 SV=1	0	3.008	3.51759	1	1	1	1	398	44.5	5.55	2.09	1
FALSE	High	Master Protein	A0A146EYA0	Exo-inulinase OS=Aspergillus luchuensis OX=1069201 GN=RIB2604_00102370 PE=3 SV=1	0	3.001	4.27729	2	2	2	1	678	74.7	5.92	2.22	2
FALSE	High	Master Protein	A0A100I6T9	Uncharacterized protein OS=Aspergillus niger OX=5061 GN=ABL_01302 PE=4 SV=1	0	2.993	1.86125	1	1	1	1	591	65.4	4.77	2.35	1
FALSE	High	Master Protein	A0A2G7G8Y2	Cytochrome b2 (Fragment) OS=Aspergillus arachidicola OX=656916 GN=AARAC_011580 PE=3 SV=1	0	2.988	2.27704	1	1	1	1	527	58.4	6.18	1.96	1
FALSE	High	Master Protein	A0A2I1DBX0	Threonyl-tRNA synthetase OS=Aspergillus campestris IBT 28561 OX=1392248 GN=P168DRAFT_324805 PE=3 SV=1	0	2.987	1.60428	1	1	1	1	748	86.1	7.24	3.1	1
FALSE	High	Master Protein	G7Y195	Uncharacterized protein OS=Aspergillus kawachii (strain NBRC 4308) OX=1033177 GN=AKAW_11066 PE=4 SV=1	0	2.97	5.22388	1	1	1	1	268	31	8.22	2.03	1
FALSE	High	Master Protein	A0A146F3N6	Enoyl-CoA hydratase/isomerase family protein OS=Aspergillus luchuensis OX=1069201 GN=RIB2604_00801900 PE=4 SV=1	0	2.952	6.40569	1	1	1	1	281	30.9	6.32	2.01	1
FALSE	High	Master Protein	A0A124BZ01	CobW domain protein OS=Aspergillus niger OX=5061 GN=ABL_09812 PE=3 SV=1	0	2.944	1.10442	1	1	1	1	996	111.1	4.73	3	1
FALSE	High	Master Protein	A0A1M3TST3	Uncharacterized protein OS=Aspergillus luchuensis CBS 106.47 OX=1137211 GN=ASPFODRAFT_42921 PE=4 SV=1	0	2.939	6.06061	1	1	1	1	198	20.8	10.68	3.13	1
FALSE	High	Master Protein	A0A1L9N8S5	T-complex protein 1 subunit delta OS=Aspergillus tubingensis CBS 134.48 OX=767770 GN=ASPTUDRAFT_145653 PE=3 SV=1	0	2.935	2.55941	1	1	1	1	547	59	7.72	2.31	1
FALSE	High	Master Protein	A0A146FGF6	Profilin OS=Aspergillus luchuensis OX=1069201 GN=RIB2604_01900410 PE=3 SV=1	0	2.932	11.5108	1	1	1	1	139	15.1	7.56	2.72	1
FALSE	High	Master Protein	A0A117E1A5	Palmitoyl-protein thioesterase OS=Aspergillus niger OX=5061 GN=ABL_06409 PE=4 SV=1	0	2.926	2.98507	1	1	1	1	402	45	5.3	3.03	1
FALSE	High	Master Protein	A0A0S7DM25	ATP phosphoribosyltransferase OS=Aspergillus lentulus OX=293939 GN=ALT_3020 PE=3 SV=1	0	2.923	3.03951	1	1	1	1	329	35.2	5.34	1.71	1
FALSE	High	Master Protein	A2QGK6	Aspergillus niger contig An03c0120, genomic contig OS=Aspergillus niger (strain CBS 513.88 / FGSC A1513) OX=425011 GN=An03g03640 PE=4 SV=1	0	2.916	3.22581	1	1	1	1	527	58.1	9.36	2.31	1
FALSE	High	Master Protein	A0A0F4YV04	E3 ubiquitin ligase complex SCF subunit sconC OS=Rasamsonia emersonii CBS 393.64 OX=1408163 GN=T310_4099 PE=3 SV=1	0	2.909	4.01606	1	1	1	1	249	28.3	4.73	2.7	1
FALSE	High	Master Protein	Q76KT3	Alpha-glucosidase OS=Aspergillus awamori OX=105351 GN=alpha-GI PE=2 SV=1	0	2.898	1.46628	1	1	1	1	1023	113	5.08	1.79	1
FALSE	High	Master Protein	A0A1M3T5T7	Aminopeptidase OS=Aspergillus luchuensis CBS 106.47 OX=1137211 GN=ASPFODRAFT_50928 PE=3 SV=1	0	2.891	1.33745	1	1	1	1	972	109.1	6.74	3.12	1
FALSE	High	Master Protein	A0A2V5HPV3	CLN3-domain-containing protein OS=Aspergillus violaceofuscus CBS 115571 OX=1450538 GN=BO99DRAFT_418260 PE=4 SV=1	0	2.879	0.933416	1	1	1	1	1607	176.5	8.41	2.64	1
FALSE	High	Master Protein	A0A1M3T1Y2	Amine oxidase OS=Aspergillus luchuensis CBS 106.47 OX=1137211 GN=ASPFODRAFT_38151 PE=3 SV=1	0	2.874	2.14286	1	1	1	1	700	79.5	6.65	2.34	1
FALSE	High	Master Protein	A0A100IL76	Stress response protein OS=Aspergillus niger OX=5061 GN=ABL_05922 PE=4 SV=1	0	2.87	2.46679	1	1	1	1	527	58.2	8.91	2.28	1
FALSE	High	Master Protein	G3XZZ8	Uncharacterized protein OS=Aspergillus niger (strain ATCC 1015 / CBS 113.46 / FGSC A1144 / LSHB Ac4 / NCTC 3858a / NRRL 328 / USDA 3528.7) OX=380704 GN=ASPNIDRAFT_53357 PE=3 SV=1	0	2.853	2.33918	1	1	1	1	513	55.8	6.4	2.87	1
FALSE	High	Master Protein	A0A2I2G289	Proteasome component C5 OS=Aspergillus steynii IBT 23096 OX=1392250 GN=P170DRAFT_466353 PE=4 SV=1	0	2.848	5.34351	1	1	1	1	262	28.6	6.34	2.35	1
FALSE	High	Master Protein	A0A117DXP3	Short chain dehydrogenase/reductase OS=Aspergillus niger OX=5061 GN=ABL_01250 PE=4 SV=1	0	2.846	3.72881	1	1	1	1	295	32.4	7.01	0	1
FALSE	High	Master Protein	A0A1L9NAL5	Uncharacterized protein OS=Aspergillus tubingensis CBS 134.48 OX=767770 GN=ASPTUDRAFT_187722 PE=3 SV=1	0	2.841	12.1212	1	1	1	1	99	10.8	7.05	2.42	1
FALSE	High	Master Protein	A0A100ITQ3	Malic enzyme OS=Aspergillus niger OX=5061 GN=ABL_09838 PE=3 SV=1	0	2.839	2.47093	2	2	2	1	688	75.8	6.18	4.32	2
FALSE	High	Master Protein	A0A100ISM8	MGS207 protein OS=Aspergillus niger OX=5061 GN=ABL_09263 PE=4 SV=1	0	2.831	3.1941	1	1	1	1	407	47	6.27	2.55	1
FALSE	High	Master Protein	A0A124BUR9	Glycogen debranching enzyme Gdb1 OS=Aspergillus niger OX=5061 GN=ABL_00375 PE=4 SV=1	0	2.825	0.466299	1	1	1	1	2359	266.8	6.47	2.41	1
FALSE	High	Master Protein	A1CBG8	G protein complex beta subunit SfaD OS=Aspergillus clavatus (strain ATCC 1007 / CBS 513.65 / DSM 816 / NCTC 3887 / NRRL 1) OX=344612 GN=ACLA_015240 PE=4 SV=1	0	2.82	2.55814	1	1	1	1	430	47.4	7.39	1.73	1
FALSE	High	Master Protein	A0A0F4Z7N1	BAR domain protein OS=Rasamsonia emersonii CBS 393.64 OX=1408163 GN=T310_0066 PE=4 SV=1	0	2.807	1.26582	1	1	1	1	790	90.4	8.57	2.6	1
FALSE	High	Master Protein	A0A100INW1	Aspartate-semialdehyde dehydrogenase OS=Aspergillus niger OX=5061 GN=ABL_07317 PE=4 SV=1	0	2.804	3.30579	1	1	1	1	363	39.2	6.8	2.16	1
FALSE	High	Master Protein	A0A146FLY5	Gamma-glutamyltranspeptidase OS=Aspergillus luchuensis OX=1069201 GN=RIB2604_02105930 PE=4 SV=1	0	2.796	2.62726	1	1	1	1	609	65.7	6.38	2.63	1
FALSE	High	Master Protein	A0A1L9NL91	Uncharacterized protein OS=Aspergillus tubingensis CBS 134.48 OX=767770 GN=ASPTUDRAFT_62163 PE=4 SV=1	0	2.794	1.54799	1	1	1	1	646	71.3	5.26	2.43	1
FALSE	High	Master Protein	A0A1L9NKR5	Uncharacterized protein OS=Aspergillus tubingensis CBS 134.48 OX=767770 GN=ASPTUDRAFT_132937 PE=4 SV=1	0	2.769	1.49254	1	1	1	1	737	79.6	8.46	0	1
FALSE	High	Master Protein	A0A254U1A3	Eukaryotic initiation factor 4E family protein OS=Aspergillus niger OX=5061 GN=CAN33_18150 PE=3 SV=1	0	2.766	0.75188	1	1	1	1	1463	162.1	9.19	2.08	1
FALSE	High	Master Protein	A0A0J5TN78	Adenylate kinase OS=Bacillus pseudalcaliphilus OX=79884 GN=adk PE=3 SV=1	0	2.762	4.60829	1	1	1	1	217	24.2	4.89	2.75	1
FALSE	High	Master Protein	A0A1L9U926	Uncharacterized protein OS=Aspergillus brasiliensis CBS 101740 OX=767769 GN=ASPBRDRAFT_33466 PE=4 SV=1	0	2.755	0.957592	1	1	1	1	1462	161.5	6.54	3.02	1
FALSE	High	Master Protein	A0A1L9U3U6	Arabinan endo-1,5-alpha-L-arabinosidase OS=Aspergillus brasiliensis CBS 101740 OX=767769 GN=ASPBRDRAFT_69778 PE=3 SV=1	0	2.755	4.61538	2	2	2	1	325	34.8	4.25	4.18	2
FALSE	High	Master Protein	A0A146F222	Similar to An01g15030 OS=Aspergillus luchuensis OX=1069201 GN=RIB2604_00700130 PE=4 SV=1	0	2.75	4.92611	1	1	1	1	203	23.6	9.44	2.34	1
FALSE	High	Master Protein	A0A100ICG2	MFS monosaccharide transporter OS=Aspergillus niger OX=5061 GN=ABL_02730 PE=3 SV=1	0	2.744	1.20724	1	1	1	1	994	109.9	9.16	2.84	1
FALSE	High	Master Protein	A0A1L9UWY1	Uncharacterized protein OS=Aspergillus brasiliensis CBS 101740 OX=767769 GN=ASPBRDRAFT_38431 PE=4 SV=1	0	2.73	5.62249	1	1	1	1	249	27.3	5.01	3.37	1
FALSE	High	Master Protein	A0A100IAD3	Mandelate racemase/muconate lactonizing enzyme family protein OS=Aspergillus niger OX=5061 GN=ABL_02218 PE=4 SV=1	0	2.718	3.13316	1	1	1	1	383	42.8	5.34	1.79	1
FALSE	High	Master Protein	A0A117DYJ6	Uncharacterized protein OS=Aspergillus niger OX=5061 GN=ABL_03222 PE=4 SV=1	0	2.696	2.30496	1	1	1	1	564	60.8	5.86	1.65	1
FALSE	High	Master Protein	A0A1M3TW41	Uncharacterized protein OS=Aspergillus luchuensis CBS 106.47 OX=1137211 GN=ASPFODRAFT_57158 PE=4 SV=1	0	2.694	6.95364	2	2	2	1	302	32.6	7.8	4.19	2
FALSE	High	Master Protein	A0A2I1C806	Putative oxidoreductase OS=Aspergillus novofumigatus IBT 16806 OX=1392255 GN=P174DRAFT_441014 PE=4 SV=1	0	2.684	5.81395	2	2	2	1	344	37.5	6.96	4.72	2
FALSE	High	Master Protein	A0A146F4J4	GMC oxidoreductase OS=Aspergillus luchuensis OX=1069201 GN=RIB2604_01001210 PE=3 SV=1	0	2.679	3.75817	2	2	2	1	612	66	5.16	2.09	2
FALSE	High	Master Protein	A0A0F4Z714	Importin subunit alpha OS=Rasamsonia emersonii CBS 393.64 OX=1408163 GN=T310_0288 PE=4 SV=1	0	2.663	1.67428	1	1	1	1	657	71.9	5.52	2.87	1
FALSE	High	Master Protein	A0A1E3B6J9	Methylenetetrahydrofolate reductase OS=Aspergillus cristatus OX=573508 GN=SI65_08090 PE=3 SV=1	0	2.661	1.63205	1	1	1	1	674	75.6	6.16	1.86	1
FALSE	High	Master Protein	A0A146F5A4	ATP dependent RNA helicase OS=Aspergillus luchuensis OX=1069201 GN=RIB2604_00900390 PE=3 SV=1	0	2.656	3.37478	2	2	2	1	563	62.2	5.8	1.93	2
FALSE	High	Master Protein	G7XHK8	Carboxylic ester hydrolase OS=Aspergillus kawachii (strain NBRC 4308) OX=1033177 GN=AKAW_04531 PE=3 SV=1	0	2.65	2.41636	1	1	1	1	538	58.6	4.77	1.82	1
FALSE	High	Master Protein	A0A146FBS9	Uncharacterized protein OS=Aspergillus luchuensis OX=1069201 GN=RIB2604_01704940 PE=4 SV=1	0	2.645	2.52101	1	1	1	1	476	48.2	4.3	3.03	1
[truncated: 305 more rows]

## Sheet: repeat 3
Checked	Protein FDR Confidence	Master	Accession	Description	Exp. q-value	Sum PEP Score	Coverage	# Peptides	# PSMs	# Unique Peptides	# Protein Groups	# AAs	MW [kDa]	calc. pI	Score Sequest HT	# Peptides Sequest HT
[truncated: 1,280 more rows]

[truncated: 4 more sheets: repeat 4, repeat 5, repeat 6, detected in all repeats ]
